# Supplementary material for: Exome sequencing identifies somatic mutations of DNA methyltransferase gene DNMT3A in acute monocytic leukemia
Source: Springer Nature journal article supplement (doi:10.1038/ng.788), 2011-03-13
Supplement: 41588_2011_BFng788_MOESM15_ESM.pdf [file 41588_2011_BFng788_MOESM15_ESM.pdf]

# Supplementary Information

## Exome Sequencing Identifies Somatic Mutations of DNA Methyltransferase

### Gene *DNMT3A* in Acute Monocytic Leukemia

Xiao-Jing Yan\*, Jie Xu\*, Zhao-Hui Gu\*, Chun-Ming Pan\*, Gang Lu\*, Yang Shen, Jing-Yi Shi, Yong-Mei Zhu, Lin Tang, Xiao-Wei Zhang, Wen-Xue Liang, Jian-Qing Mi, Huai-Dong Song, Ke-Qin Li, Zhu Chen, Sai-Juan Chen

\* These authors contributed equally to this work.

Correspondence should be addressed to Z.C. ([zchen@stn.sh.cn](mailto:zchen@stn.sh.cn)) or S-J.C. ([sjchen@stn.sh.cn](mailto:sjchen@stn.sh.cn))

## Supplementary Figures

a.

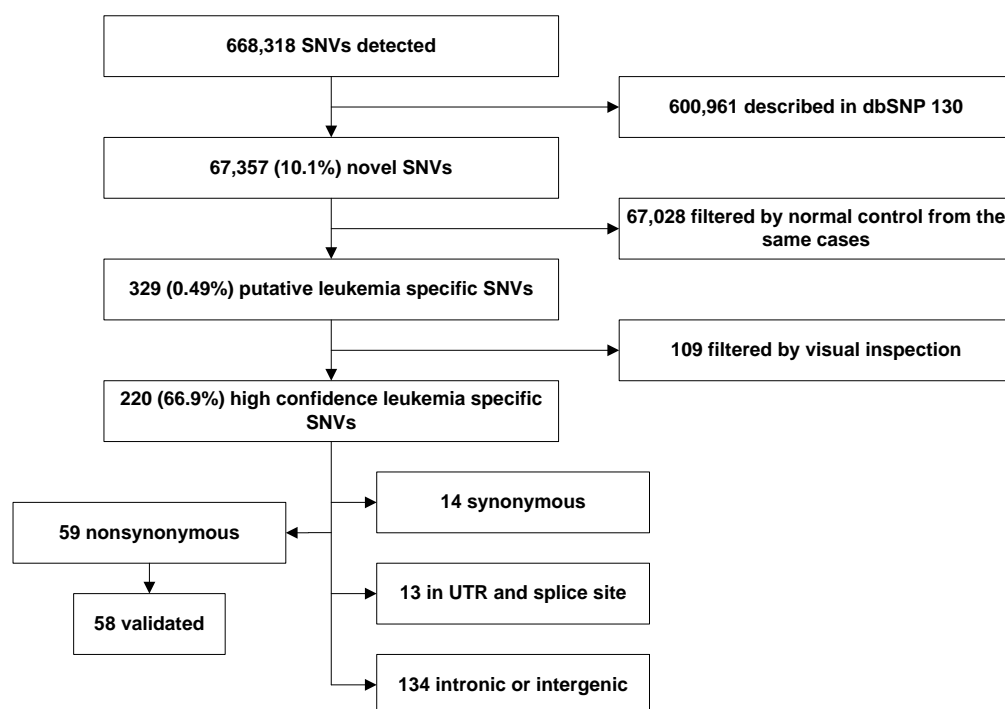

b.

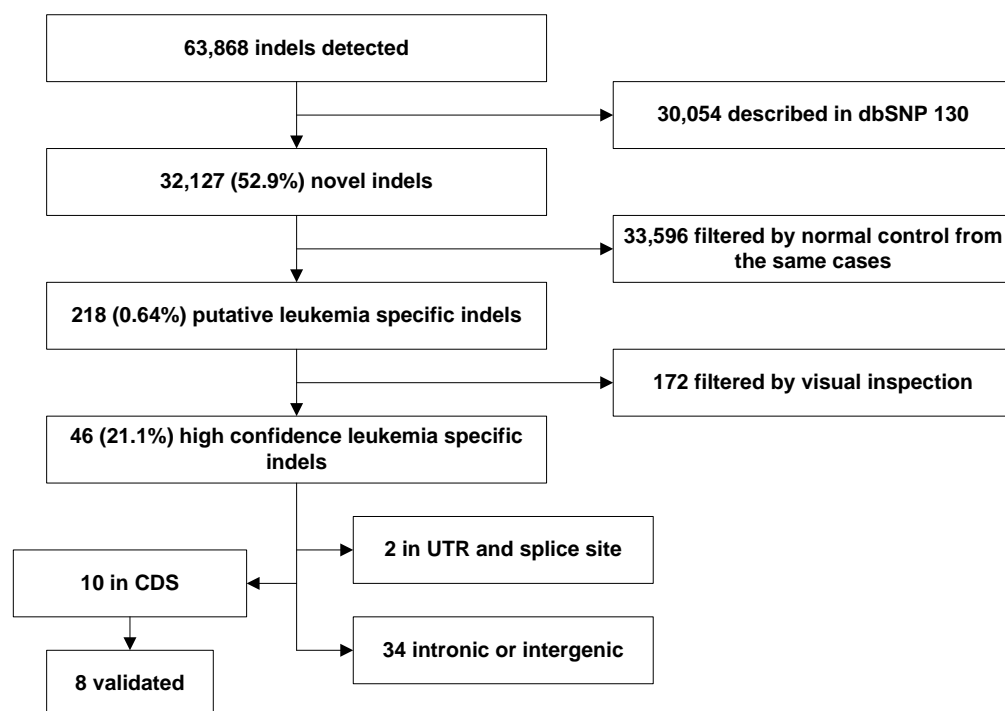

**Supplementary Figure 1. Flow chart for identification of somatic point mutations (a) and small insertions and deletions (b) from database of nine initial sequencing patients.**

SNV denotes single-nucleotide variant, dbSNP single nucleotide polymorphism database,

UTR untranslated regions, indels small insertions and deletions, and CDS coding sequence.

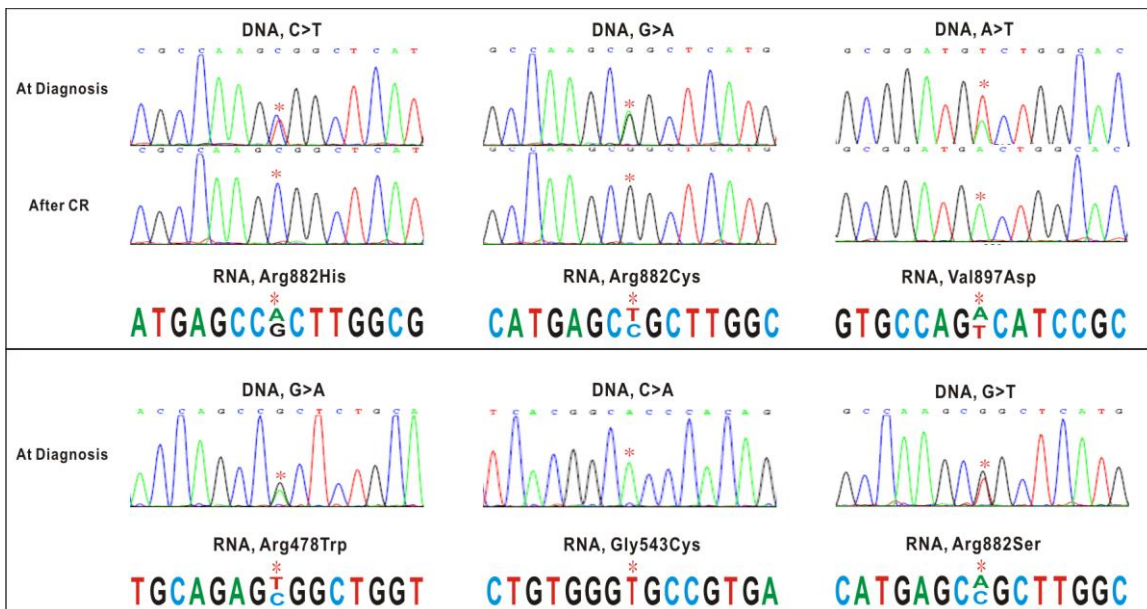

**Supplementary Figure 2. Sequencing results of *DNMT3A* gene.** Distinct mutations and amino acid replacements from the leukemia DNA samples and the paired cDNA collected (colorful letters) at diagnosis as well as the matched control samples collected during CR, were analyzed by Sanger sequencing.

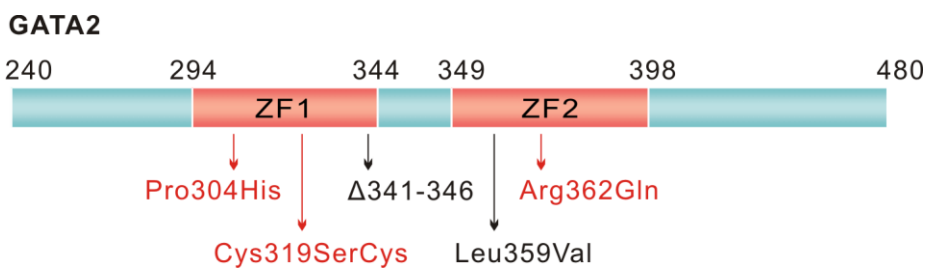

**Supplementary Figure 3. Mutations of GATA2 in protein domains.** GATA2 contains two zinc fingers (ZF1 and ZF2). The mutations in acute myelomonocytic blastic crisis of CML, which were previously reported by our lab, are labeled in black. Mutations newly found in this work are marked in red. These mutations are located in different sites of the two ZFs.

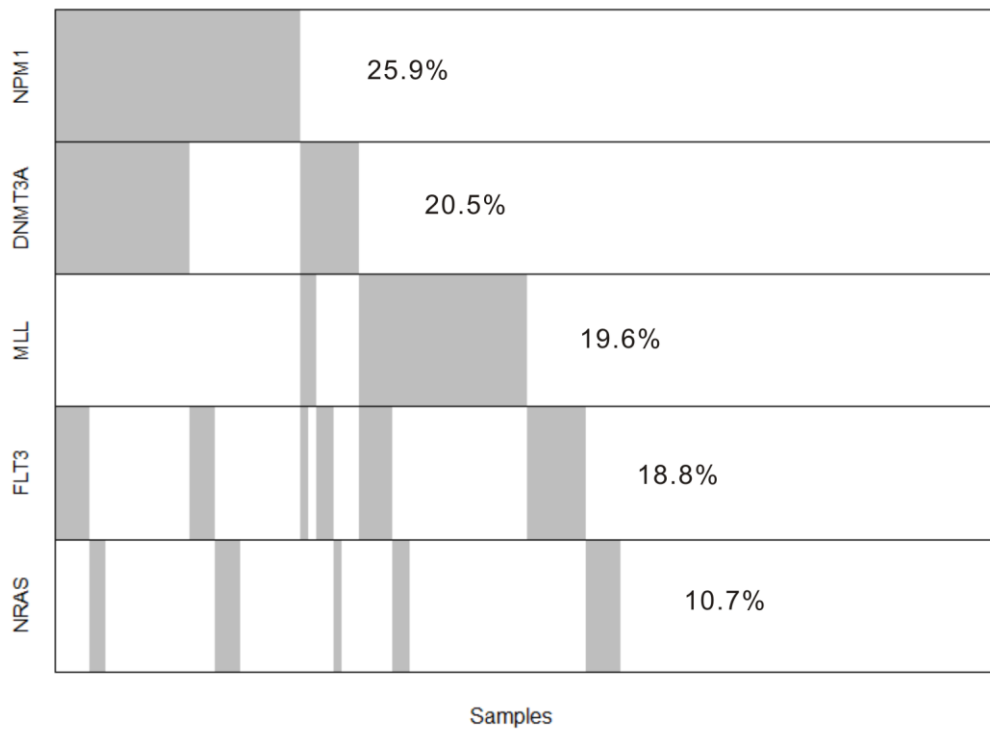

**Supplementary Figure 4. Distribution and frequencies of *DNMT3A* mutations and other common mutations in 112 AML-M5 patients.** Patients with and without genes mutations are indicated by gray filled and non-filled regions, respectively.

hDNMT3A 438 DMWVEPEAAAYAPPPPAKKPRKSTAEKPKVKEIIDERTRE<sup>↓</sup>RLVYEVRQKCRNIEDICISC  
 mDNMT3A 434 DMWVEPEAAAYAPPPPAKKPRKSTTEKPKVKEIIDERTRE<sup>↓</sup>RLVYEVRQKCRNIEDICISC  
 chDNMT3A 403 EMWVEPEAAAYAPPPPAKKPRKSTTEKPKVKEIIDERTRE<sup>↓</sup>RLVYEVRQKCRNIEDICISC  
 DrDNMT3A 380 EMW-EPEAASYTAPPPPAKKPRKNSVEKTKIKEIIDEGTRE<sup>↓</sup>RLMLEVKQKCRNIEDICISC  
 hDNMT3B 380 RRR<sup>↓</sup>TADDSATS<sup>↓</sup>DYCPAK<sup>↓</sup>RLK<sup>↓</sup>TNCYNNGKDRGDEDQ-SREQMASDVANNKSSLEDGCLISC  
 hDNMT3L 10 ----EAE<sup>↓</sup>PSMDVILVGSSELSS<sup>↓</sup>VSPGTG-----RDL<sup>↓</sup>LAYEVKANQ<sup>↓</sup>RNIEDICIC<sup>↓</sup>CC  
 HhaI 1 -----MIEIKDKQLTGLRFIDLFA

hDNMT3A 498 GSLNVTLEHPLFVGGMCQNCKNCFLECA<sup>↓</sup>YQYDDDGYQSYCTICCG<sup>↓</sup>GREVLMCGNNCCRC  
 mDNMT3A 494 GSLNVTLEHPLFVGGMCQNCKNCFLECA<sup>↓</sup>YQYDDDGYQSYCTICCG<sup>↓</sup>GREVLMCGNNCCRC  
 chDNMT3A 463 GSLNVTLEHPLFVGGMCQNCKNCFLECA<sup>↓</sup>YQYDDDGYQSYCTICCG<sup>↓</sup>GREVLMCGNNCCRC  
 DrDNMT3A 439 GSLNVTLEHPLFVGGMCQSCKN<sup>↓</sup>SFLECA<sup>↓</sup>YQYDE<sup>↓</sup>DGYQSE<sup>↓</sup>CTICCG<sup>↓</sup>GRQ<sup>↓</sup>VL<sup>↓</sup>MCGNNCCRC  
 hDNMT3B 439 GRKNPVSF<sup>↓</sup>HPLE<sup>↓</sup>FGG<sup>↓</sup>L<sup>↓</sup>COT<sup>↓</sup>CRDR<sup>↓</sup>FLE<sup>↓</sup>LFY<sup>↓</sup>MY<sup>↓</sup>DDDGYQSYCTV<sup>↓</sup>CC<sup>↓</sup>E<sup>↓</sup>GRE<sup>↓</sup>LL<sup>↓</sup>CS<sup>↓</sup>NT<sup>↓</sup>SC<sup>↓</sup>RC  
 hDNMT3L 57 GS<sup>↓</sup>L<sup>↓</sup>OV<sup>↓</sup>H<sup>↓</sup>TQ<sup>↓</sup>HPLE<sup>↓</sup>FGG<sup>↓</sup>L<sup>↓</sup>CAP<sup>↓</sup>CK<sup>↓</sup>DK<sup>↓</sup>FL<sup>↓</sup>DAL<sup>↓</sup>FLY<sup>↓</sup>DDDGYQSYCS<sup>↓</sup>IC<sup>↓</sup>CS<sup>↓</sup>GET<sup>↓</sup>LL<sup>↓</sup>IC<sup>↓</sup>GN<sup>↓</sup>PD<sup>↓</sup>CT<sup>↓</sup>RC  
 HhaI 20 G-----LGGFRLALES<sup>↓</sup>CGAECV<sup>↓</sup>YSNE<sup>↓</sup>WD<sup>↓</sup>KYA<sup>↓</sup>QEVYEMNF<sup>↓</sup>GE--KPEGDITQVNE

hDNMT3A 558 FCVECDLLVGPAAQAAIKEDPWNCYMGH<sup>↓</sup>KGT<sup>↓</sup>YGLLRREDW<sup>↓</sup>PSRLQ<sup>↓</sup>MF<sup>↓</sup>FANNHDQ<sup>↓</sup>EF  
 mDNM3TA 554 FCVECDLLVGPAAQAAIKEDPWNCYMGH<sup>↓</sup>KGT<sup>↓</sup>YGLLRREDW<sup>↓</sup>PSRLQ<sup>↓</sup>MF<sup>↓</sup>FANNHDQ<sup>↓</sup>EF  
 chDNMT3A 523 FCVECDLLVGPAAQAAIKEDPWNCYMGH<sup>↓</sup>KGV<sup>↓</sup>YGLLRREDW<sup>↓</sup>PSRLQ<sup>↓</sup>MF<sup>↓</sup>FANNHDQ<sup>↓</sup>EF  
 DrDNMT3A 499 YC<sup>↓</sup>VECDLLVGTGCAQAAI<sup>↓</sup>SEDPWNCYMC<sup>↓</sup>CSR<sup>↓</sup>SV<sup>↓</sup>FGLLRREDW<sup>↓</sup>PSRLQ<sup>↓</sup>MF<sup>↓</sup>FANNHDQ<sup>↓</sup>EF  
 hDNMT3B 499 FC<sup>↓</sup>VE<sup>↓</sup>CL<sup>↓</sup>EV<sup>↓</sup>LVGT<sup>↓</sup>GTAAE<sup>↓</sup>AK<sup>↓</sup>LQ<sup>↓</sup>EPW<sup>↓</sup>SCY<sup>↓</sup>MCL<sup>↓</sup>PQR<sup>↓</sup>CH<sup>↓</sup>GL<sup>↓</sup>RRR<sup>↓</sup>KD<sup>↓</sup>WN<sup>↓</sup>VL<sup>↓</sup>QA<sup>↓</sup>FF<sup>↓</sup>TS<sup>↓</sup>D<sup>↓</sup>TG<sup>↓</sup>LE<sup>↓</sup>Y  
 hDNMT3L 417 YC<sup>↓</sup>F<sup>↓</sup>EC<sup>↓</sup>V<sup>↓</sup>D<sup>↓</sup>SL<sup>↓</sup>VGP<sup>↓</sup>GT<sup>↓</sup>SG<sup>↓</sup>KV<sup>↓</sup>HAMS<sup>↓</sup>NW<sup>↓</sup>V<sup>↓</sup>CYL<sup>↓</sup>CL<sup>↓</sup>PSS<sup>↓</sup>RS<sup>↓</sup>G<sup>↓</sup>LL<sup>↓</sup>Q<sup>↓</sup>RR<sup>↓</sup>R<sup>↓</sup>K<sup>↓</sup>W<sup>↓</sup>S<sup>↓</sup>QL<sup>↓</sup>KA<sup>↓</sup>F<sup>↓</sup>Y<sup>↓</sup>D<sup>↓</sup>RES<sup>↓</sup>E---  
 HhaI 67 KTIPDHILCAG-----FPCQAFSISGKQKGFEDSRGTLFFDIARIVRE

hDNMT3A 618 DPPKVYPPVPAEK<sup>↓</sup>RK<sup>↓</sup>PIR<sup>↓</sup>VL<sup>↓</sup>SL<sup>↓</sup>FDGIATGLLV<sup>↓</sup>LK<sup>↓</sup>D<sup>↓</sup>LGI<sup>↓</sup>QV<sup>↓</sup>DRY<sup>↓</sup>IA<sup>↓</sup>SE<sup>↓</sup>VC<sup>↓</sup>ED<sup>↓</sup>SIT<sup>↓</sup>VG<sup>↓</sup>M<sup>↓</sup>VR<sup>↓</sup>H  
 mDNMT3A 614 DPPKVYPPVPAEK<sup>↓</sup>RK<sup>↓</sup>PIR<sup>↓</sup>VL<sup>↓</sup>SL<sup>↓</sup>FDGIATGLLV<sup>↓</sup>LK<sup>↓</sup>D<sup>↓</sup>LGI<sup>↓</sup>QV<sup>↓</sup>DRY<sup>↓</sup>IA<sup>↓</sup>SE<sup>↓</sup>VC<sup>↓</sup>ED<sup>↓</sup>SIT<sup>↓</sup>VG<sup>↓</sup>M<sup>↓</sup>VR<sup>↓</sup>H  
 chDNMT3A 583 DPPKVYPPVPAEK<sup>↓</sup>RK<sup>↓</sup>PIR<sup>↓</sup>VL<sup>↓</sup>SL<sup>↓</sup>FDGIATGLLV<sup>↓</sup>LK<sup>↓</sup>D<sup>↓</sup>LGI<sup>↓</sup>QV<sup>↓</sup>DRY<sup>↓</sup>IA<sup>↓</sup>SE<sup>↓</sup>VC<sup>↓</sup>ED<sup>↓</sup>SIT<sup>↓</sup>VG<sup>↓</sup>M<sup>↓</sup>VR<sup>↓</sup>H  
 DrDNMT3A 559 EPPAL<sup>↓</sup>YSP<sup>↓</sup>V<sup>↓</sup>A<sup>↓</sup>E<sup>↓</sup>K<sup>↓</sup>R<sup>↓</sup>Q<sup>↓</sup>PIR<sup>↓</sup>VL<sup>↓</sup>SL<sup>↓</sup>FDGIATGLLV<sup>↓</sup>LK<sup>↓</sup>D<sup>↓</sup>LGI<sup>↓</sup>QV<sup>↓</sup>DRY<sup>↓</sup>V<sup>↓</sup>A<sup>↓</sup>SE<sup>↓</sup>VC<sup>↓</sup>ED<sup>↓</sup>SIT<sup>↓</sup>VG<sup>↓</sup>M<sup>↓</sup>VR<sup>↓</sup>H  
 hDNMT3B 559 EAP<sup>↓</sup>K<sup>↓</sup>L<sup>↓</sup>Y<sup>↓</sup>PA<sup>↓</sup>IP<sup>↓</sup>AARR<sup>↓</sup>R<sup>↓</sup>PIR<sup>↓</sup>VL<sup>↓</sup>SL<sup>↓</sup>FDGIATG<sup>↓</sup>Y<sup>↓</sup>L<sup>↓</sup>V<sup>↓</sup>L<sup>↓</sup>K<sup>↓</sup>E<sup>↓</sup>L<sup>↓</sup>G<sup>↓</sup>I<sup>↓</sup>K<sup>↓</sup>V<sup>↓</sup>G<sup>↓</sup>K<sup>↓</sup>Y<sup>↓</sup>V<sup>↓</sup>A<sup>↓</sup>SE<sup>↓</sup>VC<sup>↓</sup>ES<sup>↓</sup>IA<sup>↓</sup>V<sup>↓</sup>GT<sup>↓</sup>VR<sup>↓</sup>H  
 hDNMT3L 174 NP<sup>↓</sup>LE<sup>↓</sup>MF<sup>↓</sup>ET<sup>↓</sup>VP<sup>↓</sup>VRR<sup>↓</sup>Q<sup>↓</sup>PIR<sup>↓</sup>VL<sup>↓</sup>SL<sup>↓</sup>FEDI<sup>↓</sup>KKEL<sup>↓</sup>TS<sup>↓</sup>L<sup>↓</sup>GF<sup>↓</sup>LES<sup>↓</sup>GS<sup>↓</sup>D-----  
 HhaI 111 KKP<sup>↓</sup>K<sup>↓</sup>V<sup>↓</sup>F<sup>↓</sup>MEN<sup>↓</sup>VKN<sup>↓</sup>FASH<sup>↓</sup>DNG<sup>↓</sup>N<sup>↓</sup>TLE<sup>↓</sup>V<sup>↓</sup>V<sup>↓</sup>KN<sup>↓</sup>---T<sup>↓</sup>M<sup>↓</sup>N<sup>↓</sup>EL<sup>↓</sup>D<sup>↓</sup>YS<sup>↓</sup>F<sup>↓</sup>HAK<sup>↓</sup>V<sup>↓</sup>LN<sup>↓</sup>----A<sup>↓</sup>LD<sup>↓</sup>Y<sup>↓</sup>CI<sup>↓</sup>P<sup>↓</sup>Q<sup>↓</sup>K

hDNMT3A 678 QGKIMYVGDVRSVTQKH<sup>↓</sup>I<sup>↓</sup>Q<sup>↓</sup>EW<sup>↓</sup>GP<sup>↓</sup>FDL<sup>↓</sup>VIG<sup>↓</sup>GSP<sup>↓</sup>CND<sup>↓</sup>LS<sup>↓</sup>IV<sup>↓</sup>N<sup>↓</sup>PARK<sup>↓</sup>GLY<sup>↓</sup>EGT<sup>↓</sup>GRL<sup>↓</sup>FF<sup>↓</sup>E<sup>↓</sup>F<sup>↓</sup>Y<sup>↓</sup>RL  
 mDNMT3A 674 QGKIMYVGDVRSVTQKH<sup>↓</sup>I<sup>↓</sup>Q<sup>↓</sup>EW<sup>↓</sup>GP<sup>↓</sup>FDL<sup>↓</sup>VIG<sup>↓</sup>GSP<sup>↓</sup>CND<sup>↓</sup>LS<sup>↓</sup>IV<sup>↓</sup>N<sup>↓</sup>PARK<sup>↓</sup>GLY<sup>↓</sup>EGT<sup>↓</sup>GRL<sup>↓</sup>FF<sup>↓</sup>E<sup>↓</sup>F<sup>↓</sup>Y<sup>↓</sup>RL  
 chDNMT3A 643 QGKIMYVGDV<sup>↓</sup>RV<sup>↓</sup>NT<sup>↓</sup>QKH<sup>↓</sup>I<sup>↓</sup>Q<sup>↓</sup>EW<sup>↓</sup>GP<sup>↓</sup>FDL<sup>↓</sup>VIG<sup>↓</sup>GSP<sup>↓</sup>CND<sup>↓</sup>LS<sup>↓</sup>IV<sup>↓</sup>N<sup>↓</sup>PARK<sup>↓</sup>GLY<sup>↓</sup>EGT<sup>↓</sup>GRL<sup>↓</sup>FF<sup>↓</sup>E<sup>↓</sup>F<sup>↓</sup>Y<sup>↓</sup>RL  
 DrDNMT3A 619 FERIT<sup>↓</sup>Y<sup>↓</sup>VG<sup>↓</sup>D<sup>↓</sup>IR<sup>↓</sup>NT<sup>↓</sup>TRKH<sup>↓</sup>I<sup>↓</sup>Q<sup>↓</sup>EW<sup>↓</sup>GP<sup>↓</sup>FDL<sup>↓</sup>VIG<sup>↓</sup>GSP<sup>↓</sup>CND<sup>↓</sup>LS<sup>↓</sup>IV<sup>↓</sup>N<sup>↓</sup>PARK<sup>↓</sup>GL<sup>↓</sup>FE<sup>↓</sup>GT<sup>↓</sup>GRL<sup>↓</sup>FF<sup>↓</sup>E<sup>↓</sup>F<sup>↓</sup>Y<sup>↓</sup>RL  
 hDNMT3B 619 EGN<sup>↓</sup>IK<sup>↓</sup>Y<sup>↓</sup>V<sup>↓</sup>ND<sup>↓</sup>VR<sup>↓</sup>NT<sup>↓</sup>TK<sup>↓</sup>KN<sup>↓</sup>IE<sup>↓</sup>EW<sup>↓</sup>GP<sup>↓</sup>FDL<sup>↓</sup>VIG<sup>↓</sup>GSP<sup>↓</sup>CND<sup>↓</sup>LS<sup>↓</sup>IV<sup>↓</sup>N<sup>↓</sup>PARK<sup>↓</sup>GLY<sup>↓</sup>EGT<sup>↓</sup>GRL<sup>↓</sup>FF<sup>↓</sup>E<sup>↓</sup>F<sup>↓</sup>Y<sup>↓</sup>HL  
 hDNMT3L 215 PG<sup>↓</sup>Q<sup>↓</sup>L<sup>↓</sup>K<sup>↓</sup>H<sup>↓</sup>V<sup>↓</sup>D<sup>↓</sup>V<sup>↓</sup>T<sup>↓</sup>D<sup>↓</sup>TV<sup>↓</sup>R<sup>↓</sup>K<sup>↓</sup>D<sup>↓</sup>VE<sup>↓</sup>EW<sup>↓</sup>GP<sup>↓</sup>FDL<sup>↓</sup>VY<sup>↓</sup>GAT<sup>↓</sup>P<sup>↓</sup>PL<sup>↓</sup>G<sup>↓</sup>H<sup>↓</sup>T<sup>↓</sup>CD<sup>↓</sup>R<sup>↓</sup>PP-----SW<sup>↓</sup>YL<sup>↓</sup>F<sup>↓</sup>Q<sup>↓</sup>F<sup>↓</sup>H<sup>↓</sup>RL  
 HhaI 163 RER<sup>↓</sup>TY<sup>↓</sup>MC<sup>↓</sup>FR<sup>↓</sup>ND<sup>↓</sup>NI<sup>↓</sup>Q<sup>↓</sup>N<sup>↓</sup>F<sup>↓</sup>Q<sup>↓</sup>FP<sup>↓</sup>K<sup>↓</sup>PF<sup>↓</sup>EL<sup>↓</sup>NT<sup>↓</sup>---FV<sup>↓</sup>K<sup>↓</sup>D<sup>↓</sup>LL<sup>↓</sup>PD<sup>↓</sup>SE-----VE<sup>↓</sup>HL

hDNMT3A 738 LHDARPKEGDDRPF<sup>↓</sup>FWL<sup>↓</sup>FEN<sup>↓</sup>V<sup>↓</sup>VAM<sup>↓</sup>GV<sup>↓</sup>SD<sup>↓</sup>K<sup>↓</sup>R<sup>↓</sup>DIS<sup>↓</sup>R<sup>↓</sup>F<sup>↓</sup>LES<sup>↓</sup>NP<sup>↓</sup>V<sup>↓</sup>M<sup>↓</sup>IDA<sup>↓</sup>KE<sup>↓</sup>V<sup>↓</sup>SA<sup>↓</sup>AHR<sup>↓</sup>ARY<sup>↓</sup>FW<sup>↓</sup>GN  
 mDNMT3A 734 LHDARPKEGDDRPF<sup>↓</sup>FWL<sup>↓</sup>FEN<sup>↓</sup>V<sup>↓</sup>VAM<sup>↓</sup>GV<sup>↓</sup>SD<sup>↓</sup>K<sup>↓</sup>R<sup>↓</sup>DIS<sup>↓</sup>R<sup>↓</sup>F<sup>↓</sup>LES<sup>↓</sup>NP<sup>↓</sup>V<sup>↓</sup>M<sup>↓</sup>IDA<sup>↓</sup>KE<sup>↓</sup>V<sup>↓</sup>SA<sup>↓</sup>AHR<sup>↓</sup>ARY<sup>↓</sup>FW<sup>↓</sup>GN  
 chDNMT3A 703 LHEARPKEGDDRPF<sup>↓</sup>FWL<sup>↓</sup>FEN<sup>↓</sup>V<sup>↓</sup>VAM<sup>↓</sup>GV<sup>↓</sup>SD<sup>↓</sup>K<sup>↓</sup>R<sup>↓</sup>DIS<sup>↓</sup>R<sup>↓</sup>F<sup>↓</sup>LES<sup>↓</sup>NP<sup>↓</sup>V<sup>↓</sup>M<sup>↓</sup>IDA<sup>↓</sup>KE<sup>↓</sup>V<sup>↓</sup>SA<sup>↓</sup>AHR<sup>↓</sup>ARY<sup>↓</sup>FW<sup>↓</sup>GN  
 DrDNMT3A 679 LHEARPKEGDDRPF<sup>↓</sup>FWL<sup>↓</sup>FEN<sup>↓</sup>V<sup>↓</sup>VAM<sup>↓</sup>GV<sup>↓</sup>SD<sup>↓</sup>K<sup>↓</sup>K<sup>↓</sup>DIS<sup>↓</sup>R<sup>↓</sup>F<sup>↓</sup>LE<sup>↓</sup>C<sup>↓</sup>NP<sup>↓</sup>V<sup>↓</sup>M<sup>↓</sup>IDA<sup>↓</sup>KE<sup>↓</sup>V<sup>↓</sup>SA<sup>↓</sup>AHR<sup>↓</sup>ARY<sup>↓</sup>FW<sup>↓</sup>GN  
 hDNMT3B 679 L<sup>↓</sup>N<sup>↓</sup>Y<sup>↓</sup>S<sup>↓</sup>R<sup>↓</sup>P<sup>↓</sup>K<sup>↓</sup>E<sup>↓</sup>G<sup>↓</sup>D<sup>↓</sup>D<sup>↓</sup>R<sup>↓</sup>P<sup>↓</sup>F<sup>↓</sup>F<sup>↓</sup>W<sup>↓</sup>M<sup>↓</sup>FEN<sup>↓</sup>V<sup>↓</sup>VAM<sup>↓</sup>K<sup>↓</sup>V<sup>↓</sup>G<sup>↓</sup>D<sup>↓</sup>K<sup>↓</sup>R<sup>↓</sup>DIS<sup>↓</sup>R<sup>↓</sup>F<sup>↓</sup>LE<sup>↓</sup>C<sup>↓</sup>NP<sup>↓</sup>V<sup>↓</sup>M<sup>↓</sup>IDA<sup>↓</sup>IK<sup>↓</sup>V<sup>↓</sup>SA<sup>↓</sup>AHR<sup>↓</sup>ARY<sup>↓</sup>FW<sup>↓</sup>GN  
 hDNMT3L 267 LQ<sup>↓</sup>Y<sup>↓</sup>AR<sup>↓</sup>PK<sup>↓</sup>PG<sup>↓</sup>SP<sup>↓</sup>RP<sup>↓</sup>PF<sup>↓</sup>FW<sup>↓</sup>M<sup>↓</sup>FD<sup>↓</sup>N<sup>↓</sup>L<sup>↓</sup>V<sup>↓</sup>L<sup>↓</sup>N<sup>↓</sup>K<sup>↓</sup>ED<sup>↓</sup>LD<sup>↓</sup>VAS<sup>↓</sup>R<sup>↓</sup>F<sup>↓</sup>LEM<sup>↓</sup>EP<sup>↓</sup>V<sup>↓</sup>T<sup>↓</sup>IP<sup>↓</sup>D<sup>↓</sup>V<sup>↓</sup>H<sup>↓</sup>G<sup>↓</sup>GS<sup>↓</sup>LQ<sup>↓</sup>NAV<sup>↓</sup>R<sup>↓</sup>V<sup>↓</sup>WS<sup>↓</sup>N  
 HhaI 206 VID<sup>↓</sup>R<sup>↓</sup>K<sup>↓</sup>DL<sup>↓</sup>V<sup>↓</sup>M<sup>↓</sup>T<sup>↓</sup>NQ<sup>↓</sup>E<sup>↓</sup>IE<sup>↓</sup>QT<sup>↓</sup>PK<sup>↓</sup>TV<sup>↓</sup>RL<sup>↓</sup>G<sup>↓</sup>IV<sup>↓</sup>G<sup>↓</sup>K<sup>↓</sup>G<sup>↓</sup>Q<sup>↓</sup>GER<sup>↓</sup>I<sup>↓</sup>YS<sup>↓</sup>----TR<sup>↓</sup>G<sup>↓</sup>IA<sup>↓</sup>IT<sup>↓</sup>LS<sup>↓</sup>AY<sup>↓</sup>GG<sup>↓</sup>GI<sup>↓</sup>FA<sup>↓</sup>K

hDNMT3A 798 LP-GMNRPLASTVNDKLELQ<sup>↓</sup>ECLEHGRIAK<sup>↓</sup>FS<sup>↓</sup>SKV<sup>↓</sup>RT<sup>↓</sup>IT<sup>↓</sup>TRS<sup>↓</sup>NS<sup>↓</sup>IK<sup>↓</sup>Q<sup>↓</sup>G<sup>↓</sup>K<sup>↓</sup>D<sup>↓</sup>Q<sup>↓</sup>H<sup>↓</sup>FP<sup>↓</sup>VM<sup>↓</sup>NE<sup>↓</sup>KE  
 mDNMT3A 794 LP-GMNRPLASTVNDKLELQ<sup>↓</sup>ECLEHGRIAK<sup>↓</sup>FS<sup>↓</sup>SKV<sup>↓</sup>RT<sup>↓</sup>IT<sup>↓</sup>TRS<sup>↓</sup>NS<sup>↓</sup>IK<sup>↓</sup>Q<sup>↓</sup>G<sup>↓</sup>K<sup>↓</sup>D<sup>↓</sup>Q<sup>↓</sup>H<sup>↓</sup>FP<sup>↓</sup>VM<sup>↓</sup>NE<sup>↓</sup>KE  
 chDNMT3A 763 LP-GMNRPLASTVNDKLELQ<sup>↓</sup>ECLEHGRIAK<sup>↓</sup>FS<sup>↓</sup>SKV<sup>↓</sup>RT<sup>↓</sup>IT<sup>↓</sup>TRS<sup>↓</sup>NS<sup>↓</sup>IK<sup>↓</sup>Q<sup>↓</sup>G<sup>↓</sup>K<sup>↓</sup>D<sup>↓</sup>Q<sup>↓</sup>H<sup>↓</sup>FP<sup>↓</sup>VM<sup>↓</sup>NE<sup>↓</sup>KE  
 DrDNMT3A 739 LP-GMNRPL<sup>↓</sup>TAM<sup>↓</sup>VND<sup>↓</sup>KL<sup>↓</sup>DL<sup>↓</sup>Q<sup>↓</sup>DCLEHGRT<sup>↓</sup>AK<sup>↓</sup>FN<sup>↓</sup>KV<sup>↓</sup>RT<sup>↓</sup>IT<sup>↓</sup>TRS<sup>↓</sup>NS<sup>↓</sup>IK<sup>↓</sup>Q<sup>↓</sup>G<sup>↓</sup>K<sup>↓</sup>D<sup>↓</sup>Q<sup>↓</sup>H<sup>↓</sup>Y<sup>↓</sup>P<sup>↓</sup>V<sup>↓</sup>Y<sup>↓</sup>M<sup>↓</sup>NN<sup>↓</sup>KE  
 hDNMT3B 739 LP-GMNR<sup>↓</sup>P<sup>↓</sup>V<sup>↓</sup>IAS<sup>↓</sup>K<sup>↓</sup>ND<sup>↓</sup>KLE<sup>↓</sup>LQ<sup>↓</sup>DCLE<sup>↓</sup>YN<sup>↓</sup>RIAK<sup>↓</sup>L<sup>↓</sup>K<sup>↓</sup>V<sup>↓</sup>Q<sup>↓</sup>T<sup>↓</sup>IT<sup>↓</sup>TS<sup>↓</sup>NS<sup>↓</sup>IK<sup>↓</sup>Q<sup>↓</sup>G<sup>↓</sup>K<sup>↓</sup>N<sup>↓</sup>Q<sup>↓</sup>L<sup>↓</sup>FP<sup>↓</sup>VM<sup>↓</sup>NG<sup>↓</sup>KE  
 hDNMT3L 327 LP-A<sup>↓</sup>IR-----SSR<sup>↓</sup>H<sup>↓</sup>W<sup>↓</sup>AL<sup>↓</sup>V<sup>↓</sup>SEE<sup>↓</sup>--  
 HhaI 262 TGG-----YL<sup>↓</sup>V<sup>↓</sup>NG<sup>↓</sup>KT

hDNMT3A 857 DILWCTEMERVFGFPVHYTDVSNMS<sup>↓</sup>RLARQ<sup>↓</sup>RL<sup>↓</sup>LGR<sup>↓</sup>S<sup>↓</sup>WS<sup>↓</sup>VP<sup>↓</sup>V<sup>↓</sup>IR<sup>↓</sup>HL<sup>↓</sup>FAP<sup>↓</sup>L<sup>↓</sup>KEY<sup>↓</sup>FAC<sup>↓</sup>V----  
 mDNMT3A 853 DILWCTEMERVFGFPVHYTDVSNMS<sup>↓</sup>RLARQ<sup>↓</sup>RL<sup>↓</sup>LGR<sup>↓</sup>S<sup>↓</sup>WS<sup>↓</sup>VP<sup>↓</sup>V<sup>↓</sup>IR<sup>↓</sup>HL<sup>↓</sup>FAP<sup>↓</sup>L<sup>↓</sup>KEY<sup>↓</sup>FAC<sup>↓</sup>V----  
 chDNMT3A 822 DILWCTEMERVFGFPVHYTDVSNMS<sup>↓</sup>RLARQ<sup>↓</sup>RL<sup>↓</sup>LGR<sup>↓</sup>S<sup>↓</sup>WS<sup>↓</sup>VP<sup>↓</sup>V<sup>↓</sup>IR<sup>↓</sup>HL<sup>↓</sup>FAP<sup>↓</sup>L<sup>↓</sup>KEY<sup>↓</sup>FAC<sup>↓</sup>V----  
 DrDNMT3A 798 DILWCTEMERVFGFPVHYTDVSNMS<sup>↓</sup>RLARQ<sup>↓</sup>RL<sup>↓</sup>LGR<sup>↓</sup>S<sup>↓</sup>WS<sup>↓</sup>VP<sup>↓</sup>V<sup>↓</sup>IR<sup>↓</sup>HL<sup>↓</sup>FAP<sup>↓</sup>L<sup>↓</sup>KEY<sup>↓</sup>FAC<sup>↓</sup>V----  
 hDNMT3B 798 D<sup>↓</sup>V<sup>↓</sup>L<sup>↓</sup>W<sup>↓</sup>C<sup>↓</sup>T<sup>↓</sup>E<sup>↓</sup>L<sup>↓</sup>E<sup>↓</sup>R<sup>↓</sup>I<sup>↓</sup>F<sup>↓</sup>G<sup>↓</sup>F<sup>↓</sup>P<sup>↓</sup>V<sup>↓</sup>H<sup>↓</sup>Y<sup>↓</sup>T<sup>↓</sup>D<sup>↓</sup>V<sup>↓</sup>S<sup>↓</sup>N<sup>↓</sup>M<sup>↓</sup>G<sup>↓</sup>GA<sup>↓</sup>R<sup>↓</sup>Q<sup>↓</sup>L<sup>↓</sup>LGR<sup>↓</sup>S<sup>↓</sup>WS<sup>↓</sup>VP<sup>↓</sup>V<sup>↓</sup>IR<sup>↓</sup>HL<sup>↓</sup>FAP<sup>↓</sup>L<sup>↓</sup>Y<sup>↓</sup>FAC<sup>↓</sup>E----  
 hDNMT3L 343 -----E<sup>↓</sup>I<sup>↓</sup>S<sup>↓</sup>L<sup>↓</sup>L<sup>↓</sup>AQ<sup>↓</sup>N<sup>↓</sup>Q<sup>↓</sup>SS<sup>↓</sup>KL<sup>↓</sup>AK<sup>↓</sup>W<sup>↓</sup>PT<sup>↓</sup>KL<sup>↓</sup>V<sup>↓</sup>R<sup>↓</sup>NC<sup>↓</sup>F<sup>↓</sup>L<sup>↓</sup>PL<sup>↓</sup>RE<sup>↓</sup>Y<sup>↓</sup>F<sup>↓</sup>K<sup>↓</sup>Y<sup>↓</sup>F<sup>↓</sup>ST<sup>↓</sup>EL  
 HhaI 272 RKL<sup>↓</sup>H<sup>↓</sup>P<sup>↓</sup>R<sup>↓</sup>E<sup>↓</sup>CAR<sup>↓</sup>V<sup>↓</sup>M<sup>↓</sup>G<sup>↓</sup>Y<sup>↓</sup>P<sup>↓</sup>D<sup>↓</sup>S<sup>↓</sup>Y<sup>↓</sup>K<sup>↓</sup>V<sup>↓</sup>H<sup>↓</sup>P<sup>↓</sup>ST<sup>↓</sup>SQ<sup>↓</sup>AY<sup>↓</sup>K<sup>↓</sup>Q--FC<sup>↓</sup>NS<sup>↓</sup>V<sup>↓</sup>V<sup>↓</sup>IN<sup>↓</sup>V<sup>↓</sup>L<sup>↓</sup>O<sup>↓</sup>Y<sup>↓</sup>AY<sup>↓</sup>NI<sup>↓</sup>G<sup>↓</sup>SSL<sup>↓</sup>N<sup>↓</sup>F<sup>↓</sup>K<sup>↓</sup>P<sup>↓</sup>Y--

**Supplementary Figure 5. Alignment of DNMT3As among different species and with DNMT3B and DNMT3L.** The mutation sites in DNMT3A are marked in red and indicated with arrow. All the four amino acids in DNMT3A mutated in AML-M5 are highly conserved among different species. The Gly543, Arg882 and Val897 are highly conserved between DNMT3A and DNMT3B. Arg882 in DNMT3A corresponds to Arg823 in DNMT3B, which has been found mutated in ICF (immunodeficiency, centromeric instability, facial anomalies) syndrome. h: Human, m: Mouse, ch: Chicken, Dr: Zebra fish (DANRE), HhaI: Bacterium (*Haemophilus parahaemolyticus*).

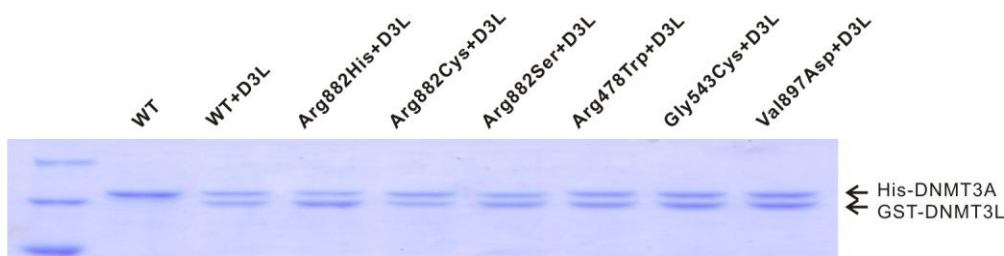

**Supplementary Figure 6. Mutations in DNMT3A did not hamper the interaction of DNMT3A with DNMT3L.** Recombinant DNMT3A or DNMT3A-DNMT3L (D3L) complex were purified from *E.coli*. The proteins used as enzymes (100 ng) were homogeneous which were monitored on 12% SDS-PAGE gel stained with Coomassie blue. WT: wild-type DNMT3A.

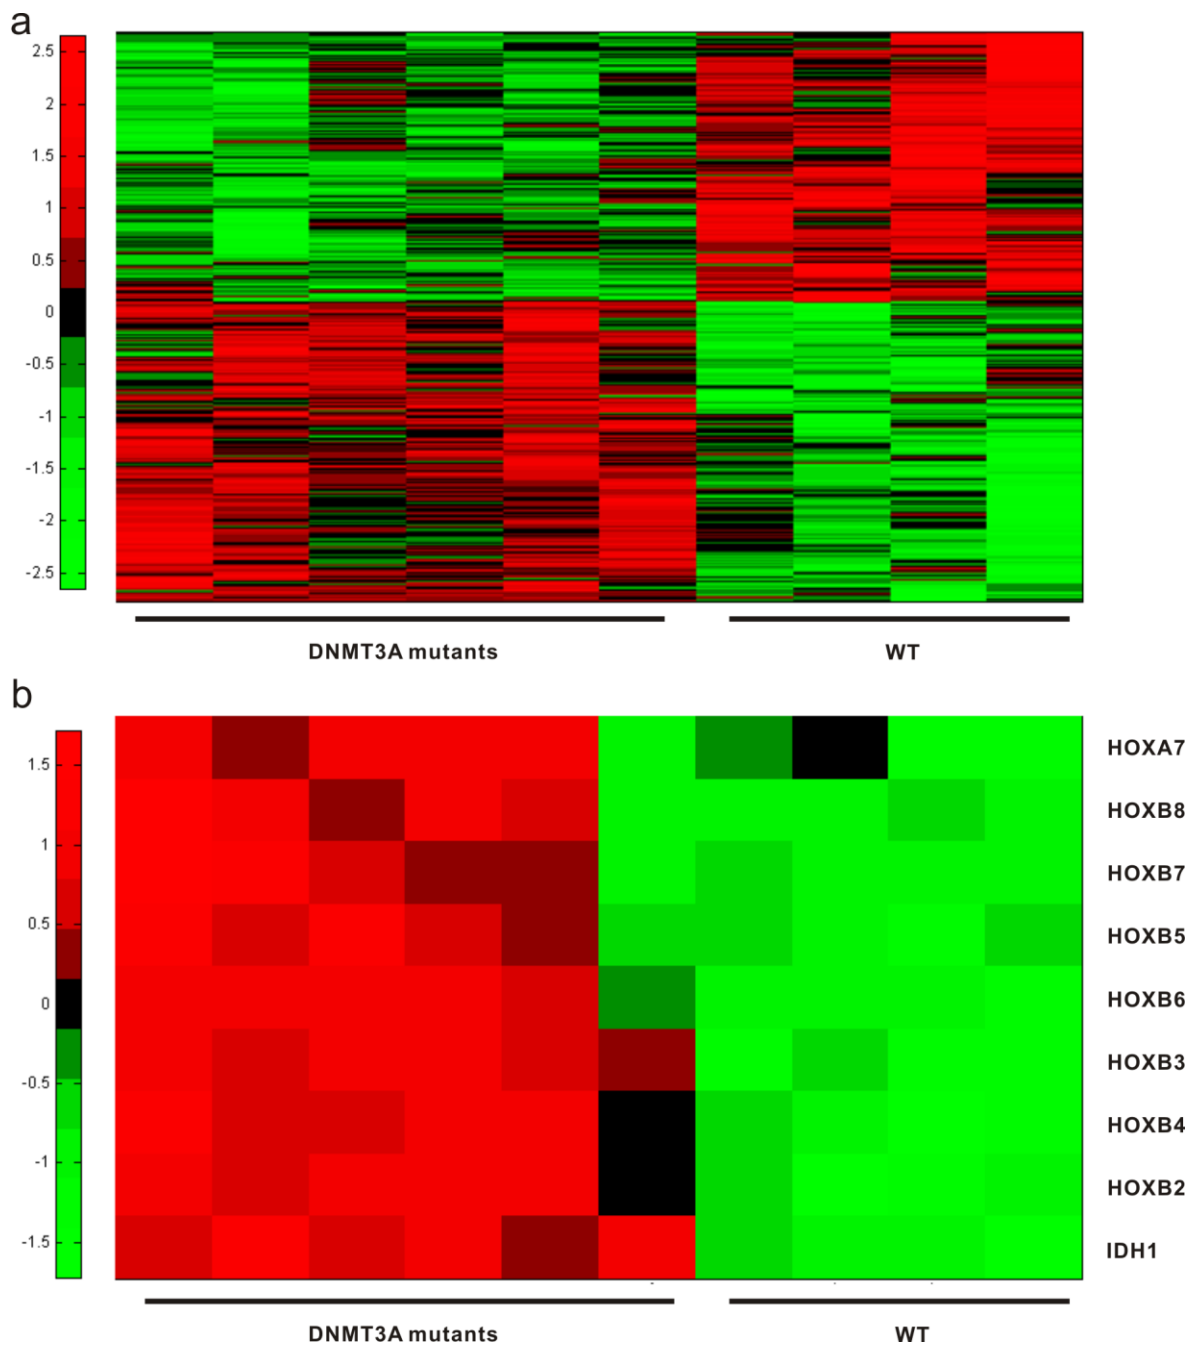

**Supplementary Figure 7. Unsupervised hierarchical cluster of differently expressed genes.** Six samples with *DNMT3A* mutations (mutants) and four cases with wild type (WT) *DNMT3A* were analyzed. Red color indicates relatively up-regulated genes, green label represents down-regulated genes, and the intermediate level is depicted as black color. **(a)** Cluster of 889 genes with significantly different expression levels between the two groups as described above. **(b)** *HOX* family and *IDH1* genes are picked up and clustered.

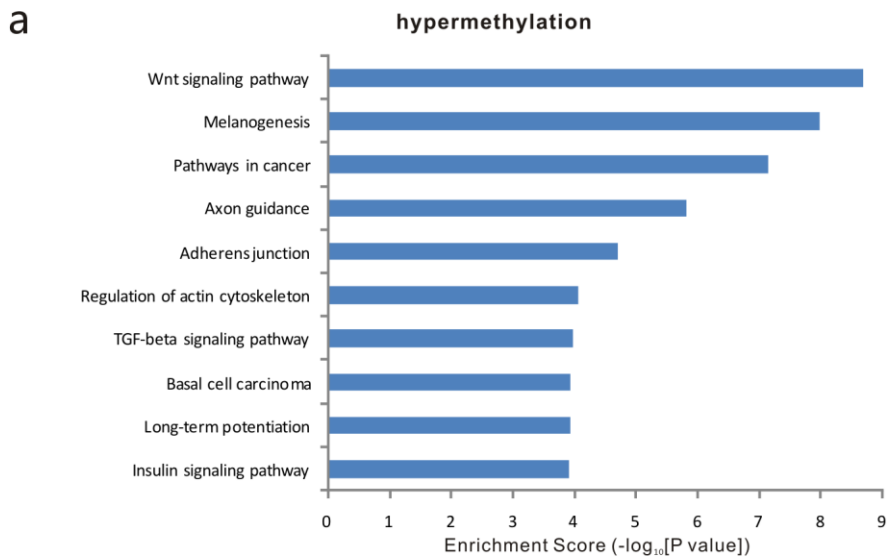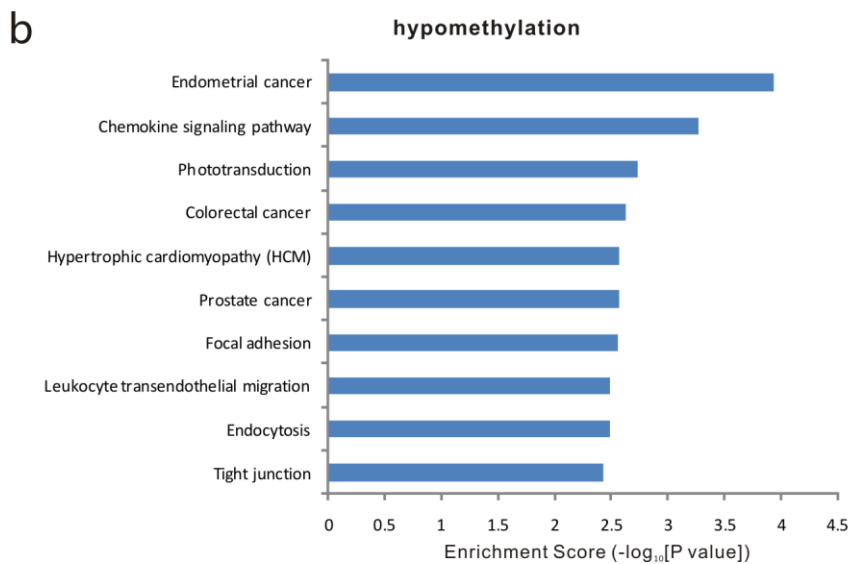

**Supplementary Figure 8. Pathway analysis.** Ten of the most significantly enriched pathways were plotted for genes of hypermethylation (**a**) or hypomethylation (**b**) in *DNMT3A* mutant patients as compared to those without the mutations. Enrichment Score reflects in an approximate way the proportion of genes involved in a pathway.



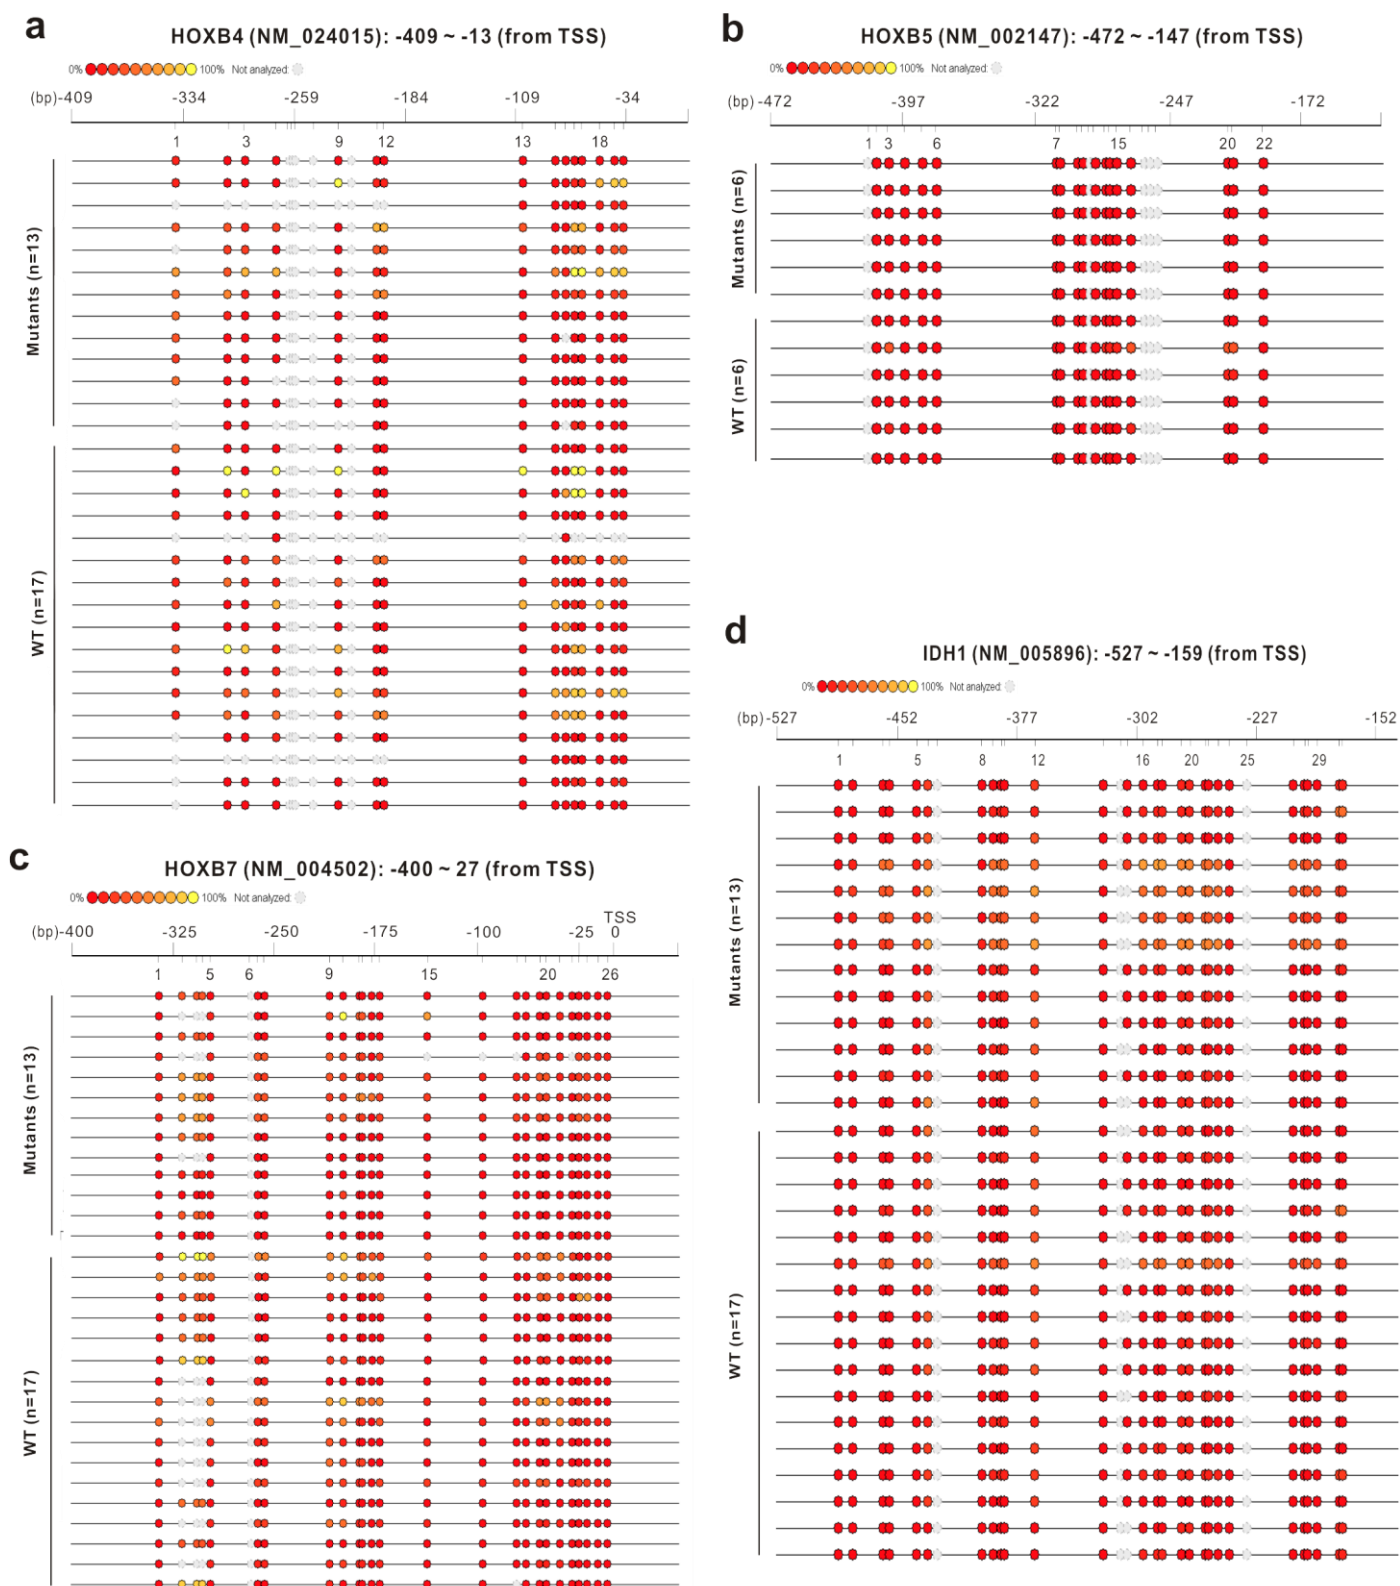

**Supplementary Figure 9. Analysis of DNA methylation in AML-M5 patients.** DNA methylation status in CpG islands adjacent to *HOXB4* (a), *HOXB5* (b), *HOXB7* (c) and *IDH1* (d) genes were analyzed respectively in AML-M5 samples.

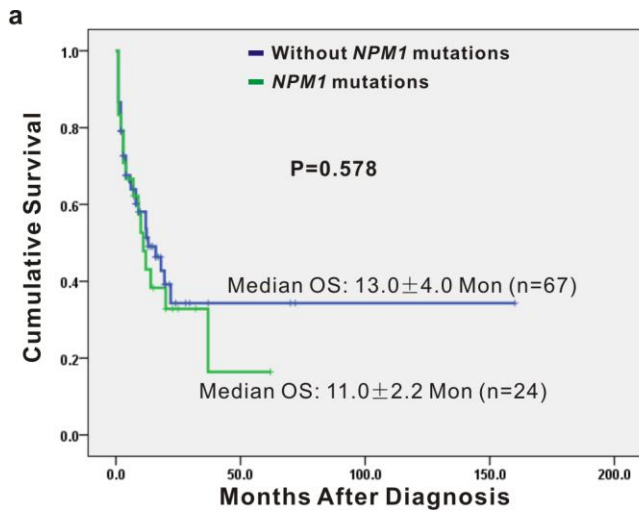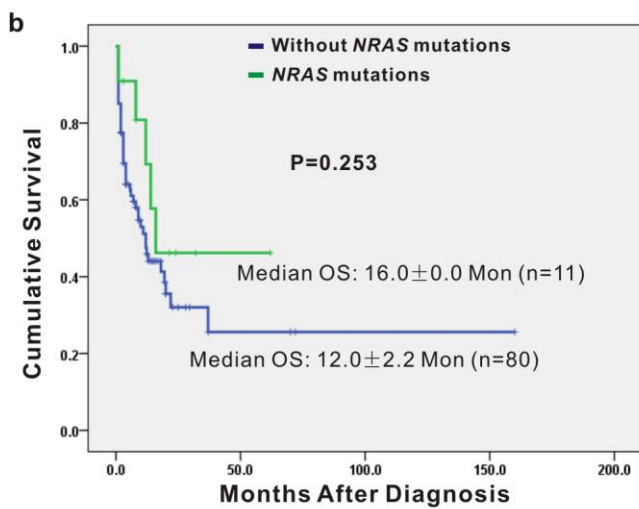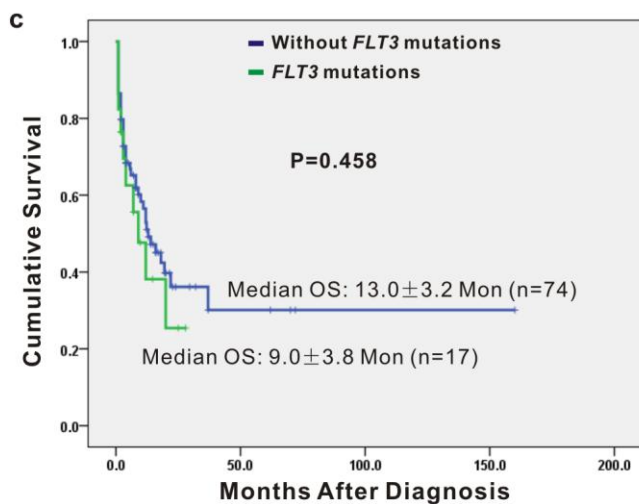

**Supplementary Figure 10. Kaplan-Meier survival analysis according to genotype in the patients with AML-M5.** No statistical differences of overall survival (OS) were observed between patients with or without mutations in *NPM1* (a), *NRAS* (b) or *FLT3* (c).

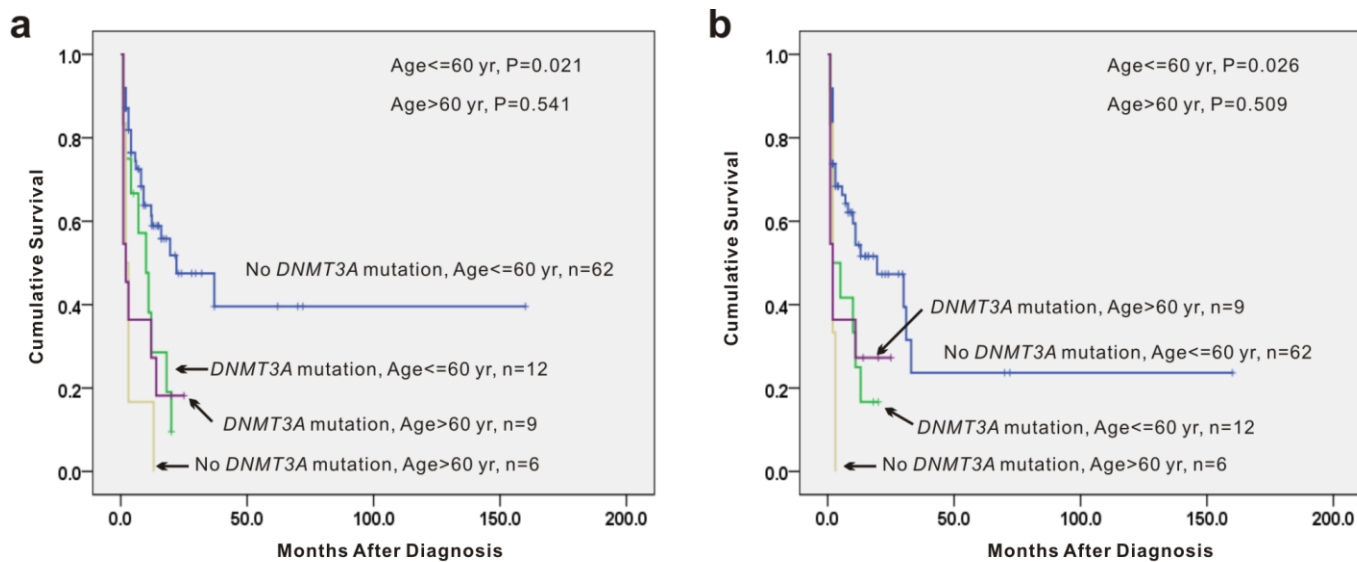

**Supplementary Figure 11. Kaplan-Meier survival estimates according to *DNMT3A* mutations and ages.** Data are shown for (a) OS and (b) time to treatment failure (TTF).

## Supplementary Tables

| Supplementary Table 1. Clinical characteristics of M5 patients in initial and expanded sequencing sets. |     |     |                                 |                                       |                  |                     |                       |                               |                                |
|---------------------------------------------------------------------------------------------------------|-----|-----|---------------------------------|---------------------------------------|------------------|---------------------|-----------------------|-------------------------------|--------------------------------|
| Patient Number                                                                                          | Sex | Age | %BM Leukemia Cells at Diagnosis | White Cells Count ( $\times 10^9/L$ ) | CR (0=no, 1=yes) | Death (0=no, 1=yes) | Relapse (0=no, 1=yes) | Months of OS (as of 08/10/10) | Months of EFS (as of 08/10/10) |
| In-1                                                                                                    | F   | 58  | 90.8                            | 55.4                                  | 1                | 0                   | 0                     | 22.8                          | 21.7                           |
| In-2                                                                                                    | M   | 30  | 74.5                            | 86.0                                  | 1                | 0                   | 1                     | 21.5                          | 10.3                           |
| In-3                                                                                                    | M   | 61  | 94.9                            | 1.1                                   | 1                | 0                   | 0                     | 20.0                          | 18.5                           |
| In-4                                                                                                    | M   | 29  | 90.4                            | 1.2                                   | 1                | 0                   | 0                     | 14.7                          | 13.4                           |
| In-5                                                                                                    | M   | 53  | 84.4                            | 2.9                                   | 1                | 0                   | 0                     | 9.0                           | 8.4                            |
| In-6                                                                                                    | F   | 54  | 89.0                            | 24.9                                  | 1                | 0                   | 0                     | 12.3                          | 7.4                            |
| In-7                                                                                                    | M   | 30  | 89.6                            | 60.0                                  | 1                | 0                   | 0                     | 9.8                           | 4.6                            |
| In-8                                                                                                    | F   | 16  | 86.5                            | 26.7                                  | 1                | 0                   | 0                     | 29.6                          | 26.8                           |
| In-9                                                                                                    | M   | 48  | 94.0                            | 152.8                                 | 1                | 0                   | 0                     | 160.1                         | 159.4                          |
| Ex-1                                                                                                    | M   | 40  | 87.2                            | 50.1                                  | 1                | 1                   | 1                     | 19.5                          | 8.7                            |
| Ex-2                                                                                                    | F   | 28  | 95.1                            | 376.8                                 | 0                | 1                   | 0                     | 5.7                           | 0.0                            |
| Ex-3                                                                                                    | M   | 25  | 96.6                            | 71.6                                  | 1                | 1                   | 1                     | 12.3                          | 6.4                            |
| Ex-4                                                                                                    | M   | 75  | 44.0                            | 66.4                                  | 1                | 0                   | 0                     | 19.6                          | 17.1                           |
| Ex-5                                                                                                    | M   | 55  | 95.2                            | 80.6                                  | 0                | 1                   | 0                     | 18.1                          | 0.0                            |

Patient In-1 to In-9 had both bone marrow (BM) samples collected at the primary diagnosis and paired normal peripheral blood specimens obtained after chemotherapy-induced complete remission (CR), defined as initial sequencing set. Patient Ex-1 to Ex-5 had only bone marrow samples at the time of initial presentation, defined as expanded sequencing set. OS: overall survival. EFS: event free survival.

**Supplementary Table 2. Sequencing depth and coverage of the nine paired initial sequencing samples.**

| Sample | Depth  | Covered $\geq$ 1X | $\geq$ 2X | $\geq$ 4X | $\geq$ 8X | $\geq$ 10X | $\geq$ 15X | $\geq$ 20X |
|--------|--------|-------------------|-----------|-----------|-----------|------------|------------|------------|
| BM1    | 74.07  | 97.86%            | 97.33%    | 96.55%    | 95.12%    | 94.37%     | 92.26%     | 89.73%     |
| BM2    | 70.43  | 98.05%            | 97.54%    | 96.74%    | 95.21%    | 94.38%     | 92.00%     | 89.08%     |
| BM3    | 69.47  | 97.90%            | 97.38%    | 96.60%    | 95.16%    | 94.40%     | 92.22%     | 89.51%     |
| BM4    | 67.69  | 98.47%            | 98.13%    | 97.53%    | 96.11%    | 95.21%     | 92.33%     | 88.61%     |
| BM5    | 106.75 | 98.69%            | 98.36%    | 97.84%    | 97.03%    | 96.67%     | 95.78%     | 94.82%     |
| BM6    | 115.71 | 98.59%            | 98.28%    | 97.77%    | 96.98%    | 96.62%     | 95.75%     | 94.85%     |
| BM7    | 100.16 | 98.52%            | 98.15%    | 97.52%    | 96.54%    | 96.09%     | 94.93%     | 93.64%     |
| BM8    | 104.78 | 98.26%            | 97.79%    | 97.02%    | 95.79%    | 95.21%     | 93.72%     | 92.09%     |
| BM9    | 159.57 | 98.77%            | 98.51%    | 98.12%    | 97.53%    | 97.28%     | 96.69%     | 96.14%     |
| PB1    | 75.61  | 97.06%            | 96.08%    | 94.53%    | 91.61%    | 90.09%     | 86.23%     | 82.26%     |
| PB2    | 73.23  | 98.15%            | 97.69%    | 96.96%    | 95.50%    | 94.68%     | 92.29%     | 89.34%     |
| PB3    | 78.88  | 98.02%            | 97.48%    | 96.62%    | 94.89%    | 93.92%     | 91.13%     | 87.81%     |
| PB4    | 73.42  | 98.25%            | 97.88%    | 97.34%    | 96.35%    | 95.80%     | 94.16%     | 91.96%     |
| PB5    | 119.52 | 98.57%            | 98.20%    | 97.62%    | 96.71%    | 96.30%     | 95.25%     | 94.12%     |
| PB6    | 118.06 | 98.31%            | 97.89%    | 97.23%    | 96.24%    | 95.79%     | 94.70%     | 93.58%     |
| PB7    | 135.37 | 98.53%            | 98.13%    | 97.54%    | 96.65%    | 96.25%     | 95.29%     | 94.33%     |
| PB8    | 138.35 | 98.42%            | 98.00%    | 97.38%    | 96.41%    | 95.97%     | 94.89%     | 93.76%     |
| PB9    | 128.82 | 98.67%            | 98.32%    | 97.76%    | 96.90%    | 96.50%     | 95.55%     | 94.56%     |

**Supplementary Table 3. Summary of somatic mutations in initial sequencing set.**

| Variant                  | SNVs (mutation number/Mb) | Indels <sup>b</sup> (mutation number/Mb) |
|--------------------------|---------------------------|------------------------------------------|
| All SNVs detected        | 220(0.25)                 | 46(0.05)                                 |
| Coding Region            |                           | 10(0.05)                                 |
| Missense                 | 54(0.25)                  | -                                        |
| Nonsense                 | 5(0.02)                   | -                                        |
| Synonymous               | 14(0.06)                  | -                                        |
| Noncoding, transcribed   |                           |                                          |
| 5' UTR                   | 3(0.30)                   | 0(0)                                     |
| 3' UTR                   | 6(0.19)                   | 2(0.06)                                  |
| Splice site <sup>a</sup> | 4                         | 0                                        |
| Intronic                 | 109(0.19)                 | 24(0.04)                                 |
| Intergenic               | 25(0.41)                  | 10(0.16)                                 |

<sup>a</sup>Intronic mutations within 4 bp of exon/intron boundary. UTR: untranslated regions.

<sup>b</sup>Indels: small insertions and deletions.

**Supplementary Table 4. Validated somatic mutations in the current work.**

| Annotated Gene | Mutation Type | Position        | Allele Change | Amino Acid Change | RefSeq       | PolyPhen Prediction | Gene Function                                | Sample Number |
|----------------|---------------|-----------------|---------------|-------------------|--------------|---------------------|----------------------------------------------|---------------|
| <i>ADAM33</i>  | missense      | chr20:3603311   | C>T           | p.S147N           | NM_153202    | probably damaging   | metalloendopeptidase activity                | In-5          |
| <i>ATP2A2</i>  | missense      | chr12:109261491 | A>G           | p.K454R           | NM_001135765 | probably damaging   | calcium-transporting ATPase activity         | In-4          |
| <i>BCL11B</i>  | missense      | chr14:98710294  | C>T           | p.G807Ser         | NM_022898    | benign              | metal ion binding                            | In-2          |
| <i>BRWD3</i>   | missense      | chrX:79934077   | G>C           | p.A121G           | NM_153252    | unknown             | unknown                                      | In-1          |
| <i>C10orf2</i> | missense      | chr10:102738655 | A>G           | p.Y233C           | NM_021830    | probably damaging   | DNA helicase activity                        | In-4          |
| <i>C2orf24</i> | missense      | chr2:219747962  | T>C           | p.I125V           | NM_015680    | possibly damaging   | unknown                                      | In-4          |
| <i>CASQ1</i>   | nonsense      | chr1:158429217  | T>G           | p.L94             | NM_001231    | damaging            | calcium ion binding                          | In-2          |
| <i>CCND3</i>   | frameshift    | chr6:42011723   | */+G          | p.R271fs*23       | NM_001760    | damaging            | protein kinase binding                       | In-2          |
| <i>CDH18</i>   | missense      | chr5:19783000   | G>T           | p.H111N           | NM_001167667 | probably damaging   | calcium ion binding                          | In-7          |
| <i>CEBPA</i>   | in-frame      | chr19:38484247  | */+GCA        | p.Q305>LQ         | NM_004364    | damaging            | transcription factor activity                | In-6          |
| <i>CHRNA4</i>  | missense      | chr20:61451906  | G>A           | p.P434L           | NM_000744    | possibly damaging   | acetylcholine receptor activity              | In-9          |
| <i>COL7A1</i>  | missense      | chr3:48607553   | A>C           | p.L15R            | NM_000094    | unknown             | serine-type endopeptidase inhibitor activity | In-4          |
| <i>CP</i>      | missense      | chr3:150422214  | G>A           | p.A19V            | NM_000096    | benign              | copper ion binding                           | In-9          |
| <i>CPLX4</i>   | missense      | chr18:55114924  | A>G           | p.C157R           | NM_181654    | probably damaging   | syntaxin binding                             | In-2          |
| <i>CTCF</i>    | missense      | chr16:66203450  | C>A           | p.P293T           | NM_006565    | probably damaging   | transcription factor activity                | In-1          |
| <i>DCAF8L1</i> | missense      | chrX:27908496   | C>T           | p.A293T           | NM_001017930 | benign              | unknown                                      | In-6          |
| <i>DCHS1</i>   | missense      | chr11:6604029   | G>C           | p.H2175D          | NM_003737    | benign              | calcium ion binding                          | In-1          |
| <i>DNMT3A</i>  | missense      | chr2:25310701   | A>T           | p.V897D           | NM_022552    | probably damaging   | methyltransferase activity                   | In-3          |
| <i>ELFN2</i>   | missense      | chr22:36100262  | C>T           | p.R420H           | NM_052906    | probably damaging   | receptor activity                            | In-2          |
| <i>EVPL</i>    | missense      | chr17:71515389  | T>C           | p.Y1831C          | NM_001988    | probably damaging   | structural molecule activity                 | In-1          |
| <i>EXO4</i>    | missense      | chr7:133273210  | T>C           | p.V685A           | NM_021807    | possibly damaging   | protein complex binding                      | In-2          |
| <i>FBXO27</i>  | missense      | chr19:44207934  | C>T           | p.R270H           | NM_178820    | probably damaging   | glycoprotein binding                         | In-5          |
| <i>FBXO3</i>   | nonsense      | chr11:33728710  | C>A           | p.E295            | NM_012175    | damaging            | ubiquitin-protein ligase activity            | In-6          |
| <i>FLT3</i>    | missense      | chr13:27490641  | T>A           | p.D835V           | NM_004119    | probably damaging   | phosphoinositide 3-kinase binding            | In-4          |

| Annotated Gene          | Mutation Type | Position       | Allele Change | Amino Acid Change | RefSeq       | PolyPhen Prediction | Gene Function                                                  | Sample Number |
|-------------------------|---------------|----------------|---------------|-------------------|--------------|---------------------|----------------------------------------------------------------|---------------|
| <i>GATA2</i>            | missense      | chr3:129683410 | C>T           | p.R362Q           | NM_032638    | probably damaging   | transcription factor activity                                  | In-4          |
| <i>GATA2</i>            | in-frame      | chr3:129685454 | */+AGG        | p.C319>SC         | NM_032638    | damaging            | transcription factor activity                                  | In-6          |
| <i>HTR3C</i>            | missense      | chr3:185260068 | G>T           | p.V291F           | NM_130770    | probably damaging   | receptor activity                                              | In-9          |
| <i>IFIH1</i>            | frameshift    | chr2:162858376 | */+T          | p.S273fs*4        | NM_022168    | damaging            | helicase activity                                              | In-8          |
| <i>KHK</i>              | missense      | chr2:27175949  | G>A           | p.G271R           | NM_006488    | probably damaging   | ketohexokinase activity                                        | In-2          |
| <i>KIAA1217</i>         | missense      | chr10:24767374 | C>T           | p.A189V           | NM_001098500 | benign              | unknown                                                        | In-5          |
| <i>KIAA1244</i>         | missense      | chr6:138697555 | C>A           | p.T1960N          | NM_020340    | unknown             | ARF guanyl-nucleotide exchange factor activity                 | In-4          |
| <i>KIAA1244</i>         | missense      | chr6:138699285 | G>A           | p.R2168K          | NM_020340    | unknown             | ARF guanyl-nucleotide exchange factor activity                 | In-9          |
| <i>KIF2C</i>            | missense      | chr1:44992066  | T>G           | p.S213A           | NM_006845    | possibly damaging   | microtubule motor activity                                     | In-3          |
| <i>KRT1</i>             | missense      | chr12:51357124 | T>G           | p.N414H           | NM_006121    | benign              | structural constituent of cytoskeleton                         | In-9          |
| <i>LAMA5</i>            | missense      | chr20:60320649 | G>A           | p.A3160V          | NM_005560    | benign              | structural molecule activity                                   | In-5          |
| <i>LPL</i>              | missense      | chr8:19853683  | G>A           | p.A125T           | NM_000237    | probably damaging   | phospholipase activity                                         | In-4          |
| <i>LRRC37A3</i>         | missense      | chr17:60295063 | A>T           | p.M1011K          | NM_199340    | probably damaging   | unknown                                                        | In-6          |
| <i>MIS12</i>            | missense      | chr17:5333217  | G>A           | p.C104Y           | NM_024039    | probably damaging   | protein binding                                                | In-7          |
| <i>MLF1IP</i>           | frameshift    | chr4:185855905 | */+TC         | p.K345fs*17       | NM_024629    | damaging            | protein binding                                                | In-6          |
| <i>MRPL14</i>           | missense      | chr6:44189722  | G>C           | p.P92A            | NM_032111    | probably damaging   | structural constituent of ribosome                             | In-5          |
| <i>NDST3</i>            | missense      | chr4:119381152 | C>A           | p.A715E           | NM_004784    | benign              | sulfotransferase activity                                      | In-2          |
| <i>NLRP4</i>            | missense      | chr19:61061958 | T>C           | p.F463L           | NM_134444    | probably damaging   | ATP binding                                                    | In-1          |
| <i>NLRP8</i>            | missense      | chr19:61159052 | G>A           | p.V606I           | NM_176811    | benign              | unknown                                                        | In-6          |
| <i>NOTCH4</i>           | missense      | chr6:32278291  | C>T           | p.G1099R          | NM_004557    | benign              | protein heterodimerization activity                            | In-4          |
| <i>NRAS</i>             | missense      | chr1:115060271 | C>T           | p.G12S            | NM_002524    | probably damaging   | GTPase activity                                                | In-2          |
| <i>NRAS<sup>a</sup></i> | missense      | chr1:115060270 | C>T           | p.G12D            | NM_002524    | probably damaging   | GTPase activity                                                | In-2          |
| <i>NSD1</i>             | missense      | chr5:176627199 | C>T           | p.P1726L          | NM_022455    | probably damaging   | histone methyltransferase activity                             | In-9          |
| <i>PBRM1</i>            | nonsense      | chr3:52643665  | G>A           | p.Q400            | NM_018165    | damaging            | Transcriptional activation and repression by chromatin binding | In-5          |

| Annotated Gene  | Mutation Type | Position        | Allele Change | Amino Acid Change | RefSeq       | PolyPhen Prediction | Gene Function                                                     | Sample Number |
|-----------------|---------------|-----------------|---------------|-------------------|--------------|---------------------|-------------------------------------------------------------------|---------------|
| <i>PCDHA8</i>   | missense      | chr5:140201193  | G>A           | p.V35I            | NM_031856    | unknown             | calcium ion binding                                               | In-4          |
| <i>PCDHB10</i>  | missense      | chr5:140552386  | C>T           | p.A26V            | NM_018930    | benign              | calcium ion binding                                               | In-8          |
| <i>PCMTD2</i>   | missense      | chr20:62369700  | G>A           | p.R200H           | NM_018257    | probably damaging   | protein-L-isoaspartate (D-aspartate) O-methyltransferase activity | In-4          |
| <i>PDLIM7</i>   | missense      | chr5:176849207  | C>T           | p.R187H           | NM_203352    | benign              | zinc ion binding                                                  | In-5          |
| <i>PIF1</i>     | missense      | chr15:62897283  | G>A           | p.T530M           | NM_025049    | benign              | ATP-dependent 5'-3' DNA/RNA helicase activity                     | In-4          |
| <i>PRICKLE3</i> | missense      | chrX:48922551   | C>G           | p.C186S           | NM_006150    | probably damaging   | zinc ion binding                                                  | In-4          |
| <i>RANBP2</i>   | missense      | chr2:108760116  | A>G           | p.K2866E          | NM_006267    | probably damaging   | Ran GTPase binding                                                | In-5          |
| <i>RUNX1</i>    | frameshift    | chr21:35086708  | */+G          | p.R319fs*1<br>36  | NM_001001890 | damaging            | transcription factor activity                                     | In-7          |
| <i>SLC24A3</i>  | missense      | chr20:19612831  | C>T           | p.R305C           | NM_020689    | benign              | calcium, potassium:sodium antiporter activity                     | In-9          |
| <i>SLC25A20</i> | nonsense      | chr3:48874982   | G>A           | p.R178            | NM_000387    | damaging            | acyl carnitine transporter activity                               | In-3          |
| <i>SLC4A11</i>  | missense      | chr20:3158413   | T>A           | p.K516M           | NM_032034    | probably damaging   | boron transmembrane transporter activity                          | In-3          |
| <i>SORCS3</i>   | missense      | chr10:107002617 | C>G           | p.T1067R          | NM_014978    | possibly damaging   | neuropeptide receptor activity                                    | In-4          |
| <i>STT3B</i>    | nonsense      | chr3:31592892   | G>A           | p.W105            | NM_178862    | damaging            | transferase activity                                              | In-6          |
| <i>TCOF1</i>    | missense      | chr5:149738661  | G>T           | p.V781L           | NM_001008657 | possibly damaging   | transporter activity                                              | In-3          |
| <i>TP53I11</i>  | missense      | chr11:44916381  | G>T           | p.L28I            | NM_006034    | probably damaging   | unknown                                                           | In-9          |
| <i>VIL1</i>     | missense      | chr2:219002423  | C>A           | p.P247T           | NM_007127    | benign              | actin binding                                                     | In-3          |
| <i>WDR11</i>    | missense      | chr10:122656309 | G>A           | p.V1157M          | NM_018117    | benign              | unknown                                                           | In-7          |
| <i>WT1</i>      | frameshift    | chr11:32374521  | */+C          | p.R369fs*1<br>5   | NM_024424    | damaging            | transcription factor activity                                     | In-4          |
| <i>WT1</i>      | in-frame      | chr11:32370144  | */-AGAACT     | p.K459_S46<br>1>T | NM_024424    | damaging            | transcription factor activity                                     | In-8          |

<sup>a</sup>Only G12S mutation in *NRAS* was detected in initial sequencing, while both G12S and G12D were validated by Sanger sequencing. The primary exome sequencing data showed that both mutations existed and the G12D mutation was filtered due to low ratio of mutant in the sample and the two mutations were not in the same allele.



**Supplementary Table 5. Mutation patterns in genes involved in at least two AML-M5 cases.**

| Annotated Gene  | Mutation Type | Position        | Allele Change | Amino Acid Change | RefSeq       | Case Numbers With Mutations | Sample                            |
|-----------------|---------------|-----------------|---------------|-------------------|--------------|-----------------------------|-----------------------------------|
| <i>ATP2A2</i>   | missense      | chr12:109261491 | A>G           | p.K454R           | NM_001135765 | 1                           | initial sequencing                |
|                 | missense      | chr12:109268521 | G>T           | p.V971L           | NM_001135765 | 1                           | expanded sequencing               |
| <i>C10orf2</i>  | missense      | chr10:102738655 | A>G           | p.Y233C           | NM_021830    | 1                           | initial sequencing                |
|                 | missense      | chr10:102739451 | A>G           | p.Q435R           | NM_021830    | 1                           | expanded sequencing               |
| <i>CCND3</i>    | frameshift    | chr6:42011723   | */+G          | p.R271fs*23       | NM_001760    | 2                           | initial and expanded sequencing   |
| <i>DCAF8L1</i>  | missense      | chrX:27908496   | C>T           | p.A293T           | NM_001017930 | 1                           | initial sequencing                |
|                 | missense      | chrX:27907690   | T>G           | p.Q561H           | NM_001017930 | 1                           | expanded sequencing               |
| <i>DNMT3A</i>   | missense      | chr2:25310701   | A>T           | p.V897D           | NM_022552    | 1                           | initial sequencing                |
|                 | missense      | chr2:25320953   | C>A           | p.G543C           | NM_022552    | 1                           | expanded sequencing               |
| <i>EXOC4</i>    | missense      | chr7:133273210  | T>C           | p.V685A           | NM_021807    | 2                           | initial sequencing and validation |
| <i>FLT3</i>     | missense      | chr13:27490641  | T>A           | p.D835V           | NM_004119    | 2                           | initial sequencing and validation |
| <i>GATA2</i>    | missense      | chr3:129683410  | C>T           | p.R362Q           | NM_032638    | 2                           | initial sequencing and validation |
|                 | in-frame      | chr3:129685454  | */+AGG        | p.C319>SC         | NM_032638    | 1                           | initial sequencing                |
| <i>KIAA1244</i> | missense      | chr6:138697555  | C>A           | p.T1960N          | NM_020340    | 1                           | initial sequencing                |
|                 | missense      | chr6:138699285  | G>A           | p.R2168K          | NM_020340    | 1                           | initial sequencing                |
| <i>LAMA5</i>    | missense      | chr20:60320649  | G>A           | p.A3160V          | NM_005560    | 1                           | initial sequencing                |
|                 | missense      | chr20:60337611  | C>T           | p.A1405T          | NM_005560    | 1                           | expanded sequencing               |
| <i>PBRM1</i>    | nonsense      | chr3:52643665   | G>A           | p.Q400            | NM_018165    | 1                           | initial sequencing                |
|                 | missense      | chr3:52638005   | T>C           | p.N431S           | NM_018165    | 1                           | expanded sequencing               |
| <i>TCOF1</i>    | missense      | chr5:149738661  | G>T           | p.V781L           | NM_001008657 | 2                           | initial sequencing and validation |
| <i>WDR11</i>    | missense      | chr10:122656309 | G>A           | p.V1157M          | NM_018117    | 1                           | initial sequencing                |
|                 | missense      | chr10:122654904 | G>A           | p.A1093T          | NM_018117    | 1                           | expanded sequencing               |
| <i>WT1</i>      | frameshift    | chr11:32374521  | */+C          | p.R369fs*15       | NM_024424    | 2                           | initial sequencing and validation |
|                 | in-frame      | chr11:32370144  | */-AGAACT     | p.K459_S461>T     | NM_024424    | 1                           | initial sequencing                |

**Samples are from 9 of initial sequencing set, 5 of expanded sequencing set and 98 of M5 validation set. All these mutations were not detected in 509 of control validation set.**

**Supplementary Table 6. Mutations of genes already known with relatively high rate in AML-M5 samples.**

| Annotated Gene | Mutation Type                 | Mutations                                                    | Frequency (%)    |
|----------------|-------------------------------|--------------------------------------------------------------|------------------|
| <i>MLL</i>     | translocation                 | <i>MLL-MLLT4, MLL-MLLT3, MLL-MLLT10, MLL-MLLT6, MLL-ELL,</i> | 22/112           |
|                | and PTD <sup>a</sup>          | <i>MLL-PTD</i>                                               | (19.6)           |
| <i>NPM1</i>    | frameshift                    | p.W288fs*11                                                  | 29/112<br>(25.9) |
| <i>NRAS</i>    | missense                      | p.G12S, p.G12D, p.G12V, p.G13D, p.Q61P, p.Q61R               | 12/112<br>(10.7) |
| <i>FLT3</i>    | missense and ITD <sup>b</sup> | p.D835A, p.D835V, p.D835Y, <i>FLT3</i> -ITD                  | 21/112<br>(18.8) |

<sup>a</sup> PTD: partial tandem duplication. <sup>b</sup> ITD: internal tandem duplication.

**Supplementary Table 7. Distribution of gene mutations in the AML-M5 patients.**

| Variable                  | WT        | Mutations <sup>a</sup> |            |
|---------------------------|-----------|------------------------|------------|
|                           |           | <i>DNMT3A</i>          | <i>MLL</i> |
| <b><i>NPM1</i> status</b> |           |                        |            |
| Mutated (%)               | 13 (18.8) | 16 (69.6)              | 0 (0.0)    |
| Unmutated (%)             | 56 (81.2) | 7 (30.4)               | 22 (100.0) |
|                           | P=0.000   |                        |            |
|                           |           | P=0.000                |            |
| <b><i>FLT3</i> status</b> |           |                        |            |
| Mutated (%)               | 10 (14.5) | 7 (30.4)               | 5 (22.7)   |
| Unmutated (%)             | 59 (85.5) | 16 (69.6)              | 17 (77.3)  |
|                           | P=0.120   |                        |            |
|                           |           | P=0.738                |            |
| <b><i>NRAS</i> status</b> |           |                        |            |
| Mutated (%)               | 7 (10.1)  | 3 (13.0)               | 2 (9.1)    |
| Unmutated (%)             | 62 (89.9) | 20 (87.0)              | 20 (90.9)  |
|                           | P=0.707   |                        |            |
|                           |           | P=1.000                |            |

**WT (Wild-type):** the patients without *DNMT3A* or *MLL* mutations.

<sup>a</sup>Two patients had both *DNMT3A* and *MLL* mutations and were grouped into two cohorts with mutations. *MLL* mutations including *MLL* translocation and *MLL-PTD*. The analysis was performed by Fisher's exact test. P Value was obtained by comparing two adjacent groups.

**Supplementary Table 8. MeDIP-chip analysis of DNA methylation in AML-M5.**

|                 | Hypermethylation | Hypomethylation |
|-----------------|------------------|-----------------|
| Genomic regions | 2,246            | 1,602           |
| Genes           | 1,946            | 1,291           |

**Hypermethylation and hypomethylation:** the status of DNA methylation in *DNMT3A* mutation samples compared to samples with wt *DNMT3A*. Detailed information was provided in methods.

**Supplementary Table 9. MeDIP-chip pattern of DNA methylation in AML-M5.**

| SampleName | PeakID | PeakStart | PeakEnd   | PeakScore | GeneName | Chromosome | Strand | PeakToTSS | Accession    |
|------------|--------|-----------|-----------|-----------|----------|------------|--------|-----------|--------------|
| D3A_WT     | 1381   | 63553766  | 63553915  | 2.13      | A1BG     | chr19      | -      | 2837      | NM_130786    |
| D3A_WT     | 1069   | 76758044  | 76758529  | 2.86      | AATK     | chr17      | -      | -3819     | NM_001080395 |
| D3A_WT     | 842    | 8723587   | 8723843   | 2.38      | ABAT     | chr16      | +      | 1642      | NM_001127448 |
| D3A_WT     | 2461   | 106727567 | 106727716 | 2.29      | ABCA1    | chr9       | -      | 2616      | NM_005502    |
| D3A_WT     | 2522   | 139045598 | 139045832 | 2.71      | ABCA2    | chr9       | -      | -2520     | NM_212533    |
| D3A_WT     | 2522   | 139045598 | 139045832 | 2.71      | ABCA2    | chr9       | -      | -3154     | NM_001606    |
| D3A_WT     | 127    | 94656360  | 94657419  | 3.36      | ABCD3    | chr1       | +      | 369       | NM_002858    |
| D3A_WT     | 1407   | 27195400  | 27195934  | 2.96      | ABHD1    | chr2       | +      | -4493     | NM_032604    |
| D3A_WT     | 2503   | 135139929 | 135140093 | 2.56      | ABO      | chr9       | -      | 440       | NM_020469    |
| D3A_WT     | 1821   | 130080976 | 130081100 | 2.35      | ACAD9    | chr3       | +      | 16        | NM_014049    |
| D3A_WT     | 13     | 1233219   | 1234854   | 2.63      | ACAP3    | chr1       | -      | -904      | NM_030649    |
| D3A_WT     | 175    | 178744378 | 178744603 | 2.3       | ACBD6    | chr1       | -      | -5845     | NM_032360    |
| D3A_WT     | 2260   | 100327650 | 100331691 | 3.28      | ACHE     | chr7       | -      | 1807      | NM_000665    |
| D3A_WT     | 993    | 37328900  | 37329149  | 2.24      | ACLY     | chr17      | -      | -226      | NM_198830    |
| D3A_WT     | 2421   | 32374537  | 32375111  | 2.37      | ACO1     | chr9       | +      | 224       | NM_002197    |
| D3A_WT     | 1830   | 142432391 | 142433930 | 4.03      | ACPL2    | chr3       | +      | -211      | NM_001037172 |
| D3A_WT     | 1757   | 49516500  | 49516644  | 2.93      | ACR      | chr22      | +      | -6945     | NM_001097    |
| D3A_WT     | 2580   | 70715787  | 70715936  | 3.21      | ACRC     | chrX       | +      | 1263      | NM_052957    |
| D3A_WT     | 920    | 87687722  | 87688372  | 3.04      | ACSF3    | chr16      | +      | 293       | NM_001127214 |
| D3A_WT     | 850    | 20498851  | 20499300  | 3.16      | ACSM2B   | chr16      | -      | -3879     | NM_001105069 |
| D3A_WT     | 2204   | 5536062   | 5536902   | 3.05      | ACTB     | chr7       | -      | 276       | NM_001101    |
| D3A_WT     | 2203   | 5534955   | 5535109   | 2.05      | ACTB     | chr7       | -      | 1726      | NM_001101    |
| D3A_WT     | 1074   | 77101096  | 77101550  | 3.13      | ACTG1    | chr17      | -      | -6901     | NM_001614    |
| D3A_WT     | 1840   | 180763734 | 180763973 | 2.42      | ACTL6A   | chr3       | +      | 452       | NM_004301    |
| D3A_WT     | 659    | 68515255  | 68515599  | 2.81      | ACTN1    | chr14      | -      | 409       | NM_001130005 |
| D3A_WT     | 211    | 234915722 | 234916890 | 2.7       | ACTN2    | chr1       | +      | -86       | NM_001103    |
| D3A_WT     | 1443   | 97646446  | 97647266  | 3.37      | ACTR1B   | chr2       | -      | 137       | NM_005735    |
| D3A_WT     | 1455   | 114363510 | 114364369 | 2.83      | ACTR3    | chr2       | +      | -67       | NM_005721    |
| D3A_WT     | 1470   | 158193274 | 158193623 | 2.35      | ACVR1C   | chr2       | -      | 197       | NM_001111033 |
| D3A_WT     | 2253   | 87401118  | 87401452  | 2.86      | ADAM22   | chr7       | +      | -352      | NM_016351    |
| D3A_WT     | 1985   | 5193175   | 5193894   | 3.11      | ADAMTS16 | chr5       | +      | 92        | NM_139056    |
| D3A_WT     | 1643   | 45319259  | 45319838  | 2.51      | ADARB1   | chr21      | +      | 628       | NM_001160230 |
| D3A_WT     | 1178   | 1858670   | 1858819   | 2.72      | ADAT3    | chr19      | +      | 2328      | NM_138422    |
| D3A_WT     | 2287   | 140015748 | 140015980 | 2.16      | ADCK2    | chr7       | +      | -3557     | NM_052853    |
| D3A_WT     | 1312   | 45914651  | 45915296  | 4.23      | ADCK4    | chr19      | -      | -2155     | NM_001142555 |
| D3A_WT     | 1312   | 45914651  | 45915296  | 4.23      | ADCK4    | chr19      | -      | -343      | NM_024876    |
| D3A_WT     | 1987   | 7449779   | 7450793   | 3.47      | ADCY2    | chr5       | +      | 944       | NM_020546    |
| D3A_WT     | 1405   | 25001729  | 25002473  | 3.83      | ADCY3    | chr2       | -      | -6542     | NM_004036    |
| D3A_WT     | 1818   | 124649607 | 124649766 | 2.29      | ADCY5    | chr3       | -      | 396       | NM_183357    |
| D3A_WT     | 874    | 48874444  | 48874803  | 2.97      | ADCY7    | chr16      | +      | -4700     | NM_001114    |
| D3A_WT     | 1751   | 49259611  | 49260562  | 2.52      | ADM2     | chr22      | +      | -6791     | NM_024866    |
| D3A_WT     | 181    | 201363590 | 201364044 | 3.24      | ADORA1   | chr1       | +      | 359       | NM_001048230 |
| D3A_WT     | 289    | 112828236 | 112829090 | 3.57      | ADRA2A   | chr10      | +      | 1884      | NM_000681    |

|        |      |           |           |      |          |       |   |       |              |
|--------|------|-----------|-----------|------|----------|-------|---|-------|--------------|
| D3A_WT | 426  | 66789844  | 66790873  | 3.08 | ADRBK1   | chr11 | + | -122  | NM_001619    |
| D3A_WT | 498  | 19484126  | 19484475  | 2.83 | AEBP2    | chr12 | + | 426   | NM_001114176 |
| D3A_WT | 1925 | 88075233  | 88076260  | 2.7  | AFF1     | chr4  | + | 569   | NM_001166693 |
| D3A_WT | 1558 | 32354504  | 32354968  | 2.71 | AHCY     | chr20 | - | 140   | NM_000687    |
| D3A_WT | 2281 | 128652031 | 128652170 | 2.55 | AHCYL2   | chr7  | + | 1     | NM_015328    |
| D3A_WT | 667  | 76993467  | 76994240  | 3.74 | AHSA1    | chr14 | + | -272  | NM_012111    |
| D3A_WT | 1674 | 19648837  | 19649478  | 2.33 | AIFM3    | chr22 | + | -260  | NM_001018060 |
| D3A_WT | 1674 | 19648837  | 19649478  | 2.33 | AIFM3    | chr22 | + | -2289 | NM_001146288 |
| D3A_WT | 2121 | 107066636 | 107066900 | 3.21 | AIM1     | chr6  | + | 346   | NM_001624    |
| D3A_WT | 1637 | 44537922  | 44538571  | 3.16 | AIRE     | chr21 | + | 3545  | NM_000658    |
| D3A_WT | 1023 | 52518651  | 52518795  | 2.02 | AKAP1    | chr17 | + | 1172  | NM_003488    |
| D3A_WT | 2463 | 111850400 | 111850649 | 2.19 | AKAP2    | chr9  | + | -272  | NM_001004065 |
| D3A_WT | 100  | 39229729  | 39230493  | 4.03 | AKIRIN1  | chr1  | + | 609   | NM_001136275 |
| D3A_WT | 2467 | 116200014 | 116200248 | 2.73 | AKNA     | chr9  | - | -3625 | NM_030767    |
| D3A_WT | 1344 | 55071648  | 55071812  | 2.78 | AKT1S1   | chr19 | - | 694   | NM_001098633 |
| D3A_WT | 1344 | 55071648  | 55071812  | 2.78 | AKT1S1   | chr19 | - | 660   | NM_032375    |
| D3A_WT | 1344 | 55071648  | 55071812  | 2.78 | AKT1S1   | chr19 | - | 726   | NM_001098632 |
| D3A_WT | 214  | 242079375 | 242079635 | 2.03 | AKT3     | chr1  | - | -6329 | NM_181690    |
| D3A_WT | 269  | 97406219  | 97406353  | 3.29 | ALDH18A1 | chr10 | - | 271   | NM_002860    |
| D3A_WT | 962  | 18027844  | 18028767  | 3.71 | ALKBH5   | chr17 | + | 714   | NM_017758    |
| D3A_WT | 766  | 83161533  | 83162091  | 3.02 | ALPK3    | chr15 | + | 898   | NM_020778    |
| D3A_WT | 824  | 2509786   | 2510605   | 4.25 | AMDHD2   | chr16 | + | -168  | NM_001145815 |
| D3A_WT | 134  | 109853828 | 109853982 | 2.06 | AMIGO1   | chr1  | - | -46   | NM_020703    |
| D3A_WT | 689  | 102456866 | 102457305 | 2.38 | AMN      | chr14 | + | -1660 | NM_030943    |
| D3A_WT | 374  | 10429030  | 10429349  | 2.88 | AMPD3    | chr11 | + | 390   | NM_000480    |
| D3A_WT | 374  | 10429030  | 10429349  | 2.88 | AMPD3    | chr11 | + | -4052 | NM_001025389 |
| D3A_WT | 374  | 10429030  | 10429349  | 2.88 | AMPD3    | chr11 | + | -4867 | NM_001025390 |
| D3A_WT | 1903 | 24987850  | 24988194  | 2.42 | ANAPC4   | chr4  | + | 77    | NM_013367    |
| D3A_WT | 450  | 101290878 | 101291012 | 2.76 | ANGPTL5  | chr11 | - | 1518  | NM_178127    |
| D3A_WT | 578  | 131848624 | 131849271 | 2.03 | ANKLE2   | chr12 | - | -423  | NM_015114    |
| D3A_WT | 922  | 88083300  | 88083421  | 2.45 | ANKRD11  | chr16 | - | 1110  | NM_013275    |
| D3A_WT | 976  | 24944638  | 24944796  | 2.38 | ANKRD13B | chr17 | + | 65    | NM_152345    |
| D3A_WT | 229  | 5971252   | 5972504   | 2.66 | ANKRD16  | chr10 | - | -12   | NM_001009941 |
| D3A_WT | 2447 | 94606122  | 94606866  | 2.7  | ANKRD19  | chr9  | + | -5219 | NR_026868    |
| D3A_WT | 1442 | 96892693  | 96892827  | 2.52 | ANKRD39  | chr2  | - | -5277 | NM_016466    |
| D3A_WT | 2022 | 132177418 | 132178291 | 2.97 | ANKRD43  | chr5  | + | 923   | NM_175873    |
| D3A_WT | 1932 | 125853206 | 125853465 | 2.64 | ANKRD50  | chr4  | - | 2     | NM_020337    |
| D3A_WT | 1427 | 71059897  | 71060051  | 2.31 | ANKRD53  | chr2  | + | 892   | NM_001115116 |
| D3A_WT | 507  | 43896142  | 43896301  | 2.73 | ANO6     | chr12 | + | 185   | NM_001142679 |
| D3A_WT | 507  | 43896142  | 43896301  | 2.73 | ANO6     | chr12 | + | 79    | NM_001142680 |
| D3A_WT | 322  | 429570    | 431319    | 4.81 | ANO9     | chr11 | - | 1567  | NM_001012302 |
| D3A_WT | 998  | 38256537  | 38256985  | 2.9  | AOC3     | chr17 | + | 35    | NM_003734    |
| D3A_WT | 999  | 38258461  | 38258715  | 2.84 | AOC3     | chr17 | + | 1862  | NM_003734    |
| D3A_WT | 330  | 915975    | 916993    | 3.41 | AP2A2    | chr11 | + | 644   | NM_012305    |
| D3A_WT | 1911 | 40911241  | 40911882  | 2.91 | APBB2    | chr4  | - | -169  | NM_173075    |
| D3A_WT | 1169 | 1401058   | 1401207   | 2.62 | APC2     | chr19 | + | -15   | NM_005883    |
| D3A_WT | 57   | 10413064  | 10413508  | 3.57 | APITD1   | chr1  | + | -100  | NM_199295    |

|        |      |           |           |      |          |       |   |       |              |
|--------|------|-----------|-----------|------|----------|-------|---|-------|--------------|
| D3A_WT | 57   | 10413064  | 10413508  | 3.57 | APITD1   | chr1  | + | 541   | NM_198544    |
| D3A_WT | 1425 | 68547801  | 68548273  | 2.83 | APLF     | chr2  | + | -157  | NM_173545    |
| D3A_WT | 1711 | 37685169  | 37685418  | 2.41 | APOBEC3A | chr22 | + | 1821  | NM_145699    |
| D3A_WT | 494  | 12768602  | 12769156  | 2.82 | APOLD1   | chr12 | + | -1238 | NM_001130415 |
| D3A_WT | 1804 | 57237435  | 57237679  | 3.05 | APPL1    | chr3  | + | 753   | NM_012096    |
| D3A_WT | 919  | 87409331  | 87410274  | 4.31 | APRT     | chr16 | - | -3959 | NM_000485    |
| D3A_WT | 512  | 48652659  | 48652898  | 2.22 | AQP6     | chr12 | + | -108  | NM_001652    |
| D3A_WT | 1907 | 35922185  | 35922724  | 2.55 | ARAP2    | chr4  | - | -80   | NM_015230    |
| D3A_WT | 398  | 47158320  | 47159471  | 3.35 | ARFGAP2  | chr11 | - | -3900 | NM_032389    |
| D3A_WT | 1602 | 61809523  | 61810172  | 2.96 | ARFRP1   | chr20 | - | -48   | NM_003224    |
| D3A_WT | 2608 | 152846821 | 152847451 | 2.61 | ARHGAP4  | chrX  | - | -2228 | NM_001666    |
| D3A_WT | 1079 | 77422770  | 77423207  | 2.43 | ARHGDI1  | chr17 | - | -461  | NM_004309    |
| D3A_WT | 623  | 110567328 | 110567786 | 3.57 | ARHGEF7  | chr13 | + | 1933  | NM_001113512 |
| D3A_WT | 80   | 26895435  | 26896386  | 2.82 | ARID1A   | chr1  | + | 802   | NM_139135    |
| D3A_WT | 751  | 72620570  | 72620785  | 2.19 | ARID3B   | chr15 | + | 77    | NM_006465    |
| D3A_WT | 1786 | 48930801  | 48931180  | 2.39 | ARIH2    | chr3  | + | -294  | NM_006321    |
| D3A_WT | 278  | 104464000 | 104464149 | 2.29 | ARL3     | chr10 | - | 106   | NM_004311    |
| D3A_WT | 1805 | 69212003  | 69212241  | 2.91 | ARL6IP5  | chr3  | + | -4657 | NM_006407    |
| D3A_WT | 1502 | 231771440 | 231772306 | 2.77 | ARMC9    | chr2  | + | 288   | NM_025139    |
| D3A_WT | 500  | 27377258  | 27377837  | 2.03 | ARNTL2   | chr12 | + | 293   | NM_020183    |
| D3A_WT | 444  | 74740186  | 74740335  | 2.7  | ARRB1    | chr11 | - | 261   | NM_020251    |
| D3A_WT | 942  | 4560489   | 4561104   | 2.43 | ARRB2    | chr17 | + | 259   | NM_199004    |
| D3A_WT | 941  | 4553888   | 4554507   | 3.33 | ARRB2    | chr17 | + | -6340 | NM_199004    |
| D3A_WT | 1212 | 4860244   | 4860869   | 2.9  | ARRDC5   | chr19 | - | -6677 | NM_001080523 |
| D3A_WT | 1665 | 18383818  | 18384483  | 2.88 | ARVCF    | chr22 | - | 159   | NM_001670    |
| D3A_WT | 2555 | 24940608  | 24941648  | 2.61 | ARX      | chrX  | - | 2858  | NM_139058    |
| D3A_WT | 2328 | 17985617  | 17985966  | 2.93 | ASAH1    | chr8  | - | 996   | NM_004315    |
| D3A_WT | 2328 | 17985617  | 17985966  | 2.93 | ASAH1    | chr8  | - | 368   | NM_177924    |
| D3A_WT | 2119 | 101438480 | 101438829 | 2.67 | ASCC3    | chr6  | - | -2709 | NM_006828    |
| D3A_WT | 356  | 2248120   | 2248574   | 3.03 | ASCL2    | chr11 | - | 411   | NM_005170    |
| D3A_WT | 2626 | 1528765   | 1529482   | 3.19 | ASMTL    | chrY  | - | 2721  | NM_004192    |
| D3A_WT | 1349 | 55712758  | 55713407  | 4.13 | ASPDH    | chr19 | - | -3323 | NM_001024656 |
| D3A_WT | 1348 | 55707787  | 55707936  | 2.01 | ASPDH    | chr19 | - | 1898  | NM_001024656 |
| D3A_WT | 1349 | 55712758  | 55713407  | 4.13 | ASPDH    | chr19 | - | -4128 | NM_001114598 |
| D3A_WT | 1348 | 55707787  | 55707936  | 2.01 | ASPDH    | chr19 | - | 1093  | NM_001114598 |
| D3A_WT | 695  | 103621880 | 103622314 | 2.28 | ASPG     | chr14 | + | 297   | NM_001080464 |
| D3A_WT | 2347 | 62789296  | 62789655  | 2.61 | ASPH     | chr8  | - | 278   | NM_004318    |
| D3A_WT | 2468 | 119216773 | 119217688 | 3.95 | ASTN2    | chr9  | - | -92   | NM_014010    |
| D3A_WT | 2086 | 32203903  | 32204043  | 2.71 | ATF6B    | chr6  | - | 22    | NM_004381    |
| D3A_WT | 1529 | 242224706 | 242226417 | 3.5  | ATG4B    | chr2  | + | -138  | NM_013325    |
| D3A_WT | 320  | 273711    | 274365    | 2.64 | ATHL1    | chr11 | + | -5099 | NM_025092    |
| D3A_WT | 488  | 6907745   | 6908170   | 2.84 | ATN1     | chr12 | + | 217   | NM_001940    |
| D3A_WT | 1435 | 85834549  | 85834908  | 2.67 | ATOH8    | chr2  | + | 309   | NM_032827    |
| D3A_WT | 1279 | 19635250  | 19635374  | 2.76 | ATP13A1  | chr19 | - | 191   | NM_020410    |
| D3A_WT | 939  | 3814193   | 3814322   | 2.19 | ATP2A3   | chr17 | - | 228   | NM_174955    |
| D3A_WT | 2611 | 153310101 | 153310875 | 3.43 | ATP6AP1  | chrX  | + | 317   | NM_001183    |
| D3A_WT | 2278 | 128289946 | 128290816 | 2.27 | ATP6V1F  | chr7  | + | 248   | NM_004231    |

|        |      |           |           |      |         |       |   |       |              |
|--------|------|-----------|-----------|------|---------|-------|---|-------|--------------|
| D3A_WT | 1177 | 1766486   | 1770324   | 4.16 | ATP8B3  | chr19 | - | -5135 | NM_138813    |
| D3A_WT | 1128 | 74930216  | 74931968  | 3.44 | ATP9B   | chr18 | + | 708   | NM_198531    |
| D3A_WT | 428  | 66939607  | 66940077  | 2.2  | ATPGD1  | chr11 | + | 118   | NM_001166222 |
| D3A_WT | 2268 | 105305294 | 105305447 | 2.04 | ATXN7L1 | chr7  | - | -1103 | NM_020725    |
| D3A_WT | 271  | 99437221  | 99437470  | 2.37 | AVPI1   | chr10 | - | -340  | NM_021732    |
| D3A_WT | 1032 | 60986601  | 60987528  | 3.01 | AXIN2   | chr17 | - | 1138  | NM_004655    |
| D3A_WT | 108  | 44217503  | 44218150  | 3.48 | B4GALT2 | chr1  | + | -943  | NM_001005417 |
| D3A_WT | 108  | 44217503  | 44218150  | 3.48 | B4GALT2 | chr1  | + | 374   | NM_003780    |
| D3A_WT | 167  | 159413507 | 159414146 | 3.25 | B4GALT3 | chr1  | - | 112   | NM_003779    |
| D3A_WT | 965  | 19206707  | 19207026  | 2.69 | B9D1    | chr17 | - | -227  | NM_015681    |
| D3A_WT | 1616 | 29592993  | 29594239  | 3.55 | BACH1   | chr21 | + | -5814 | NR_027655    |
| D3A_WT | 1616 | 29592993  | 29594239  | 3.55 | BACH1   | chr21 | + | 9     | NM_206866    |
| D3A_WT | 1616 | 29592993  | 29594239  | 3.55 | BACH1   | chr21 | + | 526   | NM_001186    |
| D3A_WT | 2117 | 91062816  | 91062957  | 2.38 | BACH2   | chr6  | - | 397   | NM_021813    |
| D3A_WT | 2118 | 91065786  | 91066235  | 2.8  | BACH2   | chr6  | - | -2727 | NM_021813    |
| D3A_WT | 2105 | 57144904  | 57145846  | 3.63 | BAG2    | chr6  | + | 313   | NM_004282    |
| D3A_WT | 2376 | 143542478 | 143543435 | 2.83 | BAI1    | chr8  | + | 578   | NM_001702    |
| D3A_WT | 810  | 1323088   | 1323609   | 2.41 | BAIAP3  | chr16 | + | -1315 | NM_003933    |
| D3A_WT | 909  | 86542743  | 86543102  | 2.79 | BANP    | chr16 | + | 384   | NM_017869    |
| D3A_WT | 124  | 90955693  | 90956562  | 3.41 | BARHL2  | chr1  | - | -745  | NM_020063    |
| D3A_WT | 2452 | 95761163  | 95761387  | 2.29 | BARX1   | chr9  | - | -3846 | NM_021570    |
| D3A_WT | 1330 | 52434949  | 52435110  | 2.38 | BBC3    | chr19 | - | -7166 | NM_001127242 |
| D3A_WT | 1812 | 108726711 | 108727167 | 2.31 | BBX     | chr3  | + | 2467  | NM_020235    |
| D3A_WT | 862  | 31027927  | 31028081  | 2.18 | BCKDK   | chr16 | + | 842   | NM_005881    |
| D3A_WT | 1453 | 111596835 | 111597299 | 2.48 | BCL2L11 | chr2  | + | 2106  | NM_138621    |
| D3A_WT | 1322 | 49942535  | 49942874  | 2.14 | BCL3    | chr19 | + | -1113 | NM_005178    |
| D3A_WT | 684  | 100110016 | 100110575 | 2.64 | BEGAIN  | chr14 | - | -6135 | NM_001159531 |
| D3A_WT | 684  | 100110016 | 100110575 | 2.64 | BEGAIN  | chr14 | - | -4411 | NM_020836    |
| D3A_WT | 2104 | 56927609  | 56927948  | 3.79 | BEND6   | chr6  | + | 47    | NM_152731    |
| D3A_WT | 319  | 198794    | 199743    | 4.08 | BET1L   | chr11 | - | -1846 | NM_001098787 |
| D3A_WT | 2586 | 102354336 | 102354775 | 2.02 | BEX4    | chrX  | + | -2120 | NM_001127688 |
| D3A_WT | 2348 | 65655193  | 65656116  | 2.23 | BHLHE22 | chr8  | + | 287   | NM_152414    |
| D3A_WT | 1660 | 16636480  | 16636929  | 2.68 | BID     | chr22 | - | 75    | NM_197966    |
| D3A_WT | 1660 | 16636480  | 16636929  | 2.68 | BID     | chr22 | - | 554   | NM_001196    |
| D3A_WT | 451  | 101722779 | 101723333 | 3.11 | BIRC2   | chr11 | + | -119  | NM_001166    |
| D3A_WT | 1546 | 6696540   | 6697792   | 2.31 | BMP2    | chr20 | + | 422   | NM_001200    |
| D3A_WT | 101  | 39729713  | 39729877  | 2.16 | BMP8A   | chr1  | + | -109  | NM_181809    |
| D3A_WT | 253  | 75163035  | 75163359  | 2.48 | BMS1P4  | chr10 | - | -2919 | NR_026592    |
| D3A_WT | 765  | 81744095  | 81744744  | 2.76 | BNC1    | chr15 | - | 53    | NM_001717    |
| D3A_WT | 1815 | 114412584 | 114412713 | 2.05 | BOC     | chr3  | + | -1416 | NM_033254    |
| D3A_WT | 593  | 31783534  | 31783798  | 2.21 | BRCA2   | chr13 | + | -3950 | NM_000059    |
| D3A_WT | 2615 | 153952695 | 153952976 | 2.78 | BRCC3   | chrX  | + | -68   | NM_001018055 |
| D3A_WT | 2387 | 144845089 | 144846553 | 5.31 | BREA2   | chr8  | + | -5451 | NR_015445    |
| D3A_WT | 2388 | 144847099 | 144847827 | 2.85 | BREA2   | chr8  | + | -3809 | NR_015445    |
| D3A_WT | 2389 | 144850278 | 144850847 | 3.28 | BREA2   | chr8  | + | -710  | NR_015445    |
| D3A_WT | 707  | 104838135 | 104838389 | 2.86 | BRF1    | chr14 | - | 112   | NM_001519    |
| D3A_WT | 423  | 65866199  | 65866328  | 2.53 | BRMS1   | chr11 | - | 2895  | NM_001024957 |

|        |      |           |           |      |           |       |   |       |              |
|--------|------|-----------|-----------|------|-----------|-------|---|-------|--------------|
| D3A_WT | 1142 | 523427    | 524077    | 2.97 | BSG       | chr19 | + | 216   | NM_198589    |
| D3A_WT | 1142 | 523427    | 524077    | 2.97 | BSG       | chr19 | + | 1428  | NM_198591    |
| D3A_WT | 1899 | 15314538  | 15314987  | 2.66 | BST1      | chr4  | + | 1092  | NM_004334    |
| D3A_WT | 764  | 81526545  | 81526694  | 2.4  | BTBD1     | chr15 | - | 491   | NM_025238    |
| D3A_WT | 545  | 106237158 | 106237792 | 4.09 | BTBD11    | chr12 | + | 1149  | NM_001018072 |
| D3A_WT | 676  | 92868370  | 92868990  | 2.38 | BTBD7     | chr14 | - | 458   | NM_001002860 |
| D3A_WT | 116  | 52294710  | 52295079  | 3.23 | BTF3L4    | chr1  | + | 450   | NM_152265    |
| D3A_WT | 296  | 124898039 | 124898303 | 2.95 | BUB3      | chr10 | + | -5578 | NM_001007793 |
| D3A_WT | 1486 | 201385320 | 201385474 | 2.2  | BZW1      | chr2  | + | 506   | NM_014670    |
| D3A_WT | 1486 | 201385320 | 201385474 | 2.2  | BZW1L1    | chr2  | + | -4706 | NR_026584    |
| D3A_WT | 291  | 115929228 | 115929362 | 2.42 | C10orf118 | chr10 | - | -4941 | NM_018017    |
| D3A_WT | 294  | 121621987 | 121622726 | 3.6  | C10orf119 | chr10 | - | 28    | NM_024834    |
| D3A_WT | 227  | 5767129   | 5767558   | 3.49 | C10orf18  | chr10 | + | 537   | NM_017782    |
| D3A_WT | 284  | 105987916 | 105988066 | 2.32 | C10orf79  | chr10 | - | -5881 | NM_025145    |
| D3A_WT | 305  | 134103304 | 134103738 | 2.82 | C10orf91  | chr10 | + | -5182 | NM_173541    |
| D3A_WT | 308  | 134611454 | 134611606 | 2.19 | C10orf93  | chr10 | - | -5476 | NM_173572    |
| D3A_WT | 277  | 104200225 | 104200739 | 3.11 | C10orf95  | chr10 | - | 808   | NM_024886    |
| D3A_WT | 455  | 110675174 | 110675600 | 2.65 | C11orf92  | chr11 | - | 362   | NM_207429    |
| D3A_WT | 455  | 110675174 | 110675600 | 2.65 | C11orf93  | chr11 | + | 202   | NM_001136105 |
| D3A_WT | 520  | 51979785  | 51979939  | 2.6  | C12orf10  | chr12 | + | 126   | NM_021640    |
| D3A_WT | 542  | 102414677 | 102414825 | 2.67 | C12orf42  | chr12 | - | -875  | NM_198521    |
| D3A_WT | 542  | 102414677 | 102414825 | 2.67 | C12orf42  | chr12 | - | -872  | NM_001099336 |
| D3A_WT | 553  | 115660021 | 115660485 | 2.51 | C12orf49  | chr12 | - | -27   | NM_024738    |
| D3A_WT | 497  | 14859314  | 14859758  | 2.61 | C12orf69  | chr12 | - | -1153 | NM_001013698 |
| D3A_WT | 543  | 102875146 | 102875686 | 2.46 | C12orf73  | chr12 | - | -293  | NM_001135570 |
| D3A_WT | 594  | 38509768  | 38509927  | 2.29 | C13orf23  | chr13 | - | 405   | NM_170719    |
| D3A_WT | 622  | 110323296 | 110324549 | 2.38 | C13orf29  | chr13 | - | -3266 | NR_027701    |
| D3A_WT | 650  | 49170541  | 49171673  | 2.78 | C14orf104 | chr14 | - | 591   | NM_001083908 |
| D3A_WT | 667  | 76993467  | 76994240  | 3.74 | C14orf133 | chr14 | - | -196  | NM_022067    |
| D3A_WT | 660  | 69110957  | 69111091  | 2.33 | C14orf162 | chr14 | - | -3353 | NR_024630    |
| D3A_WT | 663  | 76561989  | 76564437  | 3.5  | C14orf4   | chr14 | - | 1574  | NM_024496    |
| D3A_WT | 788  | 550357    | 550906    | 2.96 | C16orf11  | chr16 | + | 209   | NM_145270    |
| D3A_WT | 789  | 551822    | 552101    | 2.36 | C16orf11  | chr16 | + | 1539  | NM_145270    |
| D3A_WT | 791  | 631593    | 632329    | 3.41 | C16orf13  | chr16 | - | -5613 | NM_001040165 |
| D3A_WT | 790  | 623567    | 624646    | 2.56 | C16orf13  | chr16 | - | 2242  | NM_001040165 |
| D3A_WT | 812  | 1483300   | 1483619   | 2.7  | C16orf38  | chr16 | - | -4990 | NM_001013658 |
| D3A_WT | 811  | 1338668   | 1339687   | 4.1  | C16orf42  | chr16 | - | 2697  | NM_001001410 |
| D3A_WT | 852  | 21926934  | 21928491  | 3    | C16orf52  | chr16 | + | 756   | NM_001164579 |
| D3A_WT | 879  | 56587766  | 56590215  | 5.84 | C16orf57  | chr16 | + | -3815 | NM_024598    |
| D3A_WT | 852  | 21926934  | 21928491  | 3    | C16orf65  | chr16 | - | -7783 | NM_173806    |
| D3A_WT | 864  | 31613236  | 31613817  | 2.36 | C16orf67  | chr16 | + | -5908 | NR_024034    |
| D3A_WT | 906  | 84343393  | 84343672  | 2.32 | C16orf74  | chr16 | - | -1342 | NM_206967    |
| D3A_WT | 849  | 19642324  | 19642459  | 2.88 | C16orf88  | chr16 | - | -5398 | NM_001012991 |
| D3A_WT | 1091 | 77969561  | 77969910  | 2.62 | C17orf101 | chr17 | - | 6     | NM_175902    |
| D3A_WT | 1091 | 77969561  | 77969910  | 2.62 | C17orf101 | chr17 | - | 16    | NM_024648    |
| D3A_WT | 946  | 6859288   | 6859557   | 2.25 | C17orf49  | chr17 | + | 626   | NM_001142798 |
| D3A_WT | 1035 | 63419880  | 63420224  | 3.1  | C17orf58  | chr17 | - | 175   | NM_181655    |

|        |      |           |           |      |           |       |   |       |              |
|--------|------|-----------|-----------|------|-----------|-------|---|-------|--------------|
| D3A_WT | 1076 | 77247764  | 77247907  | 2.47 | C17orf90  | chr17 | - | -3812 | NM_001039842 |
| D3A_WT | 1119 | 50137943  | 50138222  | 2.41 | C18orf54  | chr18 | + | -1086 | NM_173529    |
| D3A_WT | 1109 | 19337602  | 19337836  | 2.64 | C18orf8   | chr18 | + | 260   | NM_013326    |
| D3A_WT | 1283 | 34898054  | 34898313  | 2.48 | C19orf12  | chr19 | - | -380  | NM_001031726 |
| D3A_WT | 1283 | 34898054  | 34898313  | 2.48 | C19orf12  | chr19 | - | 109   | NM_031448    |
| D3A_WT | 1149 | 697843    | 698078    | 2.35 | C19orf21  | chr19 | + | -4185 | NM_173481    |
| D3A_WT | 1162 | 1226557   | 1227211   | 3    | C19orf23  | chr19 | - | -5625 | NR_027271    |
| D3A_WT | 1162 | 1226557   | 1227211   | 3    | C19orf24  | chr19 | + | 365   | NM_017914    |
| D3A_WT | 1198 | 3582632   | 3582776   | 2.14 | C19orf29  | chr19 | - | -4891 | NM_001080543 |
| D3A_WT | 1179 | 1904767   | 1906711   | 4.53 | C19orf34  | chr19 | - | -191  | NM_152771    |
| D3A_WT | 1260 | 16633010  | 16633249  | 2.68 | C19orf42  | chr19 | - | -1161 | NM_024104    |
| D3A_WT | 1308 | 45546165  | 45546304  | 2.34 | C19orf47  | chr19 | - | -101  | NM_178830    |
| D3A_WT | 1238 | 10900214  | 10900568  | 2.84 | C19orf52  | chr19 | + | -32   | NM_138358    |
| D3A_WT | 1292 | 40938496  | 40938840  | 2.53 | C19orf55  | chr19 | + | -2215 | NM_001039887 |
| D3A_WT | 1347 | 55674730  | 55675172  | 2.76 | C19orf63  | chr19 | + | 3404  | NM_206538    |
| D3A_WT | 1216 | 5638732   | 5638896   | 2.43 | C19orf70  | chr19 | - | -6903 | NM_205767    |
| D3A_WT | 1341 | 54883121  | 54883675  | 2.12 | C19orf76  | chr19 | + | -355  | NM_001101340 |
| D3A_WT | 215  | 242581194 | 242581425 | 2.18 | C1orf100  | chr1  | + | -1250 | NM_001012970 |
| D3A_WT | 138  | 111308074 | 111308419 | 3.24 | C1orf103  | chr1  | - | -157  | NM_018372    |
| D3A_WT | 193  | 218930484 | 218930633 | 2.75 | C1orf115  | chr1  | + | 308   | NM_024709    |
| D3A_WT | 149  | 149955637 | 149955776 | 2    | C1orf230  | chr1  | + | -4930 | NM_001144956 |
| D3A_WT | 150  | 149960712 | 149960861 | 3.02 | C1orf230  | chr1  | + | 150   | NM_001144956 |
| D3A_WT | 201  | 226355646 | 226356425 | 2.31 | C1orf35   | chr1  | - | 1610  | NM_024319    |
| D3A_WT | 30   | 2507714   | 2508554   | 2.95 | C1orf93   | chr1  | + | 26    | NM_152371    |
| D3A_WT | 198  | 224803930 | 224804574 | 3.07 | C1orf95   | chr1  | + | 1129  | NM_001003665 |
| D3A_WT | 205  | 227544930 | 227545553 | 3.5  | C1orf96   | chr1  | - | 70    | NM_145257    |
| D3A_WT | 807  | 1083346   | 1084325   | 3.04 | C1QTNF8   | chr16 | - | 2410  | NM_207419    |
| D3A_WT | 1573 | 54366854  | 54367303  | 2.69 | C20orf108 | chr20 | + | -311  | NM_080821    |
| D3A_WT | 1554 | 30535428  | 30536376  | 2.86 | C20orf112 | chr20 | - | -953  | NM_080616    |
| D3A_WT | 1604 | 61963624  | 61964563  | 2.91 | C20orf135 | chr20 | + | 1084  | NM_080622    |
| D3A_WT | 1598 | 61650934  | 61651164  | 2.84 | C20orf195 | chr20 | + | -3767 | NM_024059    |
| D3A_WT | 1586 | 60562679  | 60563333  | 2.5  | C20orf200 | chr20 | - | -3830 | NM_152757    |
| D3A_WT | 1607 | 62190144  | 62191008  | 2.73 | C20orf201 | chr20 | - | -4420 | NM_001007125 |
| D3A_WT | 1541 | 5048566   | 5049020   | 2.03 | C20orf30  | chr20 | - | -7060 | NM_001009923 |
| D3A_WT | 1536 | 226463    | 226612    | 2.53 | C20orf96  | chr20 | - | -7147 | NM_153269    |
| D3A_WT | 1631 | 42315164  | 42315343  | 2.62 | C21orf121 | chr21 | + | 72    | NR_027273    |
| D3A_WT | 1643 | 45319259  | 45319838  | 2.51 | C21orf122 | chr21 | - | -1994 | NR_027292    |
| D3A_WT | 1634 | 43695833  | 43696992  | 3.42 | C21orf125 | chr21 | + | 2081  | NR_026960    |
| D3A_WT | 1651 | 46426244  | 46426978  | 3.83 | C21orf56  | chr21 | - | 2190  | NM_001142854 |
| D3A_WT | 1652 | 46428344  | 46429208  | 2.24 | C21orf56  | chr21 | - | 25    | NM_001142854 |
| D3A_WT | 1654 | 46530979  | 46531154  | 2    | C21orf57  | chr21 | + | 372   | NM_058181    |
| D3A_WT | 1642 | 45177006  | 45177355  | 2.53 | C21orf70  | chr21 | + | -7202 | NM_058190    |
| D3A_WT | 1628 | 39903856  | 39903995  | 2.51 | C21orf88  | chr21 | - | 2694  | NR_026543    |
| D3A_WT | 1615 | 18113331  | 18113780  | 3.36 | C21orf91  | chr21 | - | 19    | NM_017447    |
| D3A_WT | 1665 | 18383818  | 18384483  | 2.88 | C22orf25  | chr22 | + | -4480 | NM_152906    |
| D3A_WT | 1730 | 44015338  | 44015467  | 2.76 | C22orf9   | chr22 | - | -88   | NM_001009880 |
| D3A_WT | 151  | 150077298 | 150077737 | 2.87 | C2CD4D    | chr1  | - | 2140  | NM_001136003 |



|        |      |           |           |      |          |       |   |       |              |
|--------|------|-----------|-----------|------|----------|-------|---|-------|--------------|
| D3A_WT | 1525 | 241477837 | 241479791 | 3.72 | C2orf54  | chr2  | - | 1311  | NM_024861    |
| D3A_WT | 1488 | 210747945 | 210748192 | 2.32 | C2orf67  | chr2  | - | -3772 | NM_152519    |
| D3A_WT | 1501 | 231610579 | 231611343 | 2.72 | C2orf72  | chr2  | + | 437   | NM_001144994 |
| D3A_WT | 1533 | 242462622 | 242464331 | 3.93 | C2orf85  | chr2  | + | 2918  | NM_173821    |
| D3A_WT | 1532 | 242456092 | 242456541 | 2.2  | C2orf85  | chr2  | + | -4242 | NM_173821    |
| D3A_WT | 1423 | 63668848  | 63669197  | 2.35 | C2orf86  | chr2  | - | 333   | NM_015910    |
| D3A_WT | 1854 | 197923579 | 197923824 | 3.22 | C3orf34  | chr3  | - | -181  | NM_032898    |
| D3A_WT | 1786 | 48930801  | 48931180  | 2.39 | C3orf71  | chr3  | - | 832   | NM_001123040 |
| D3A_WT | 1908 | 37134420  | 37134557  | 2.19 | C4orf19  | chr4  | + | 2542  | NM_001104629 |
| D3A_WT | 1904 | 25524644  | 25524773  | 2.03 | C4orf52  | chr4  | + | -203  | NM_001145432 |
| D3A_WT | 1964 | 495892    | 496610    | 3.07 | C5orf55  | chr5  | - | 7     | NM_138464    |
| D3A_WT | 1994 | 41298324  | 41298452  | 2.77 | C6       | chr5  | - | -1091 | NM_001115131 |
| D3A_WT | 2087 | 32447234  | 32447413  | 2.36 | C6orf10  | chr6  | - | 311   | NM_006781    |
| D3A_WT | 2074 | 13595123  | 13595477  | 2.5  | C6orf114 | chr6  | - | -906  | NM_033069    |
| D3A_WT | 2096 | 41148788  | 41149222  | 2.97 | C6orf130 | chr6  | - | -839  | NM_145063    |
| D3A_WT | 2084 | 30723232  | 30723501  | 2.73 | C6orf136 | chr6  | + | 572   | NM_145029    |
| D3A_WT | 2106 | 72186804  | 72187233  | 3.11 | C6orf155 | chr6  | - | 151   | NR_026807    |
| D3A_WT | 2162 | 169934555 | 169935209 | 2.98 | C6orf208 | chr6  | + | 2789  | NR_026780    |
| D3A_WT | 2175 | 882341    | 882485    | 2.48 | C7orf20  | chr7  | + | -303  | NM_015949    |
| D3A_WT | 2252 | 86687800  | 86687929  | 2.14 | C7orf23  | chr7  | - | -897  | NM_024315    |
| D3A_WT | 2228 | 44992585  | 44993144  | 4.34 | C7orf40  | chr7  | - | -80   | NR_003697    |
| D3A_WT | 2244 | 66023246  | 66024126  | 2.27 | C7orf42  | chr7  | + | 49    | NM_017994    |
| D3A_WT | 2179 | 1144031   | 1144170   | 2.04 | C7orf50  | chr7  | - | 319   | NM_032350    |
| D3A_WT | 2257 | 99918923  | 99919141  | 2.18 | C7orf51  | chr7  | + | -453  | NM_173564    |
| D3A_WT | 2520 | 138958325 | 138959045 | 2.99 | C8G      | chr9  | + | -833  | NM_000606    |
| D3A_WT | 2400 | 145407968 | 145410181 | 2.93 | C8orf30A | chr8  | + | 387   | NM_016458    |
| D3A_WT | 2410 | 146248560 | 146249089 | 3.74 | C8orf33  | chr8  | + | 197   | NM_023080    |
| D3A_WT | 2383 | 144526709 | 144527467 | 2.56 | C8orf51  | chr8  | - | -4908 | NR_026785    |
| D3A_WT | 2489 | 131122813 | 131123082 | 2.81 | C9orf106 | chr9  | + | -168  | NM_001012715 |
| D3A_WT | 2459 | 103288627 | 103289779 | 2.69 | C9orf125 | chr9  | - | 93    | NM_032342    |
| D3A_WT | 2515 | 138497330 | 138497983 | 3.11 | C9orf163 | chr9  | + | -111  | NM_152571    |
| D3A_WT | 2527 | 139285198 | 139286747 | 3.6  | C9orf167 | chr9  | + | -6128 | NM_017723    |
| D3A_WT | 2441 | 88953196  | 88953737  | 2.88 | C9orf170 | chr9  | + | 88    | NM_001001709 |
| D3A_WT | 2519 | 138858268 | 138859043 | 2.42 | C9orf172 | chr9  | + | -32   | NM_001080482 |
| D3A_WT | 2449 | 94898341  | 94899092  | 3.7  | C9orf89  | chr9  | + | 446   | NM_032310    |
| D3A_WT | 1336 | 53840116  | 53840798  | 3.21 | CA11     | chr19 | - | 806   | NM_001217    |
| D3A_WT | 1584 | 60418907  | 60423836  | 3.36 | CABLES2  | chr20 | - | -5637 | NM_031215    |
| D3A_WT | 558  | 119563036 | 119563960 | 2.57 | CABP1    | chr12 | + | 694   | NM_001033677 |
| D3A_WT | 429  | 67054130  | 67054482  | 2.6  | CABP2    | chr11 | - | -6831 | NM_031204    |
| D3A_WT | 1692 | 28446275  | 28446701  | 2.99 | CABP7    | chr22 | + | 145   | NM_182527    |
| D3A_WT | 1793 | 50514122  | 50515576  | 2.49 | CACNA2D2 | chr3  | - | 1047  | NM_006030    |
| D3A_WT | 854  | 24174674  | 24174924  | 2.59 | CACNG3   | chr16 | + | 423   | NM_006539    |
| D3A_WT | 226  | 5529511   | 5529661   | 2.22 | CALML5   | chr10 | - | 1947  | NM_017422    |
| D3A_WT | 2247 | 71439627  | 71440046  | 2.45 | CALN1    | chr7  | - | 308   | NM_001017440 |
| D3A_WT | 316  | 134998421 | 135003396 | 3.68 | CALY     | chr10 | - | -443  | NM_015722    |
| D3A_WT | 2226 | 44330350  | 44331204  | 2.97 | CAMK2B   | chr7  | - | 978   | NM_172084    |
| D3A_WT | 1842 | 185461472 | 185461631 | 2.89 | CAMK2N2  | chr3  | - | 394   | NM_033259    |

|        |      |           |           |      |          |       |   |       |              |
|--------|------|-----------|-----------|------|----------|-------|---|-------|--------------|
| D3A_WT | 50   | 6768081   | 6768434   | 2.07 | CAMTA1   | chr1  | + | 287   | NM_015215    |
| D3A_WT | 620  | 110065856 | 110066290 | 2.54 | CARKD    | chr13 | + | 65    | NM_018210    |
| D3A_WT | 367  | 3034810   | 3035344   | 3.71 | CARS     | chr11 | - | 170   | NM_001751    |
| D3A_WT | 63   | 15723508  | 15724249  | 3.9  | CASP9    | chr1  | - | -501  | NM_032996    |
| D3A_WT | 421  | 65548639  | 65550588  | 2.47 | CATSPER1 | chr11 | - | 951   | NM_053054    |
| D3A_WT | 78   | 26382834  | 26382956  | 2.1  | CATSPER4 | chr1  | + | -6810 | NM_198137    |
| D3A_WT | 882  | 65620382  | 65621227  | 2.05 | CBFB     | chr16 | + | 254   | NM_022845    |
| D3A_WT | 1061 | 75433594  | 75433950  | 2.32 | CBX4     | chr17 | - | -5964 | NM_003655    |
| D3A_WT | 1059 | 75428265  | 75430641  | 2.58 | CBX4     | chr17 | - | -1645 | NM_003655    |
| D3A_WT | 1060 | 75431793  | 75432212  | 2.44 | CBX4     | chr17 | - | -4194 | NM_003655    |
| D3A_WT | 123  | 89230679  | 89231048  | 3.05 | CCBL2    | chr1  | - | 368   | NM_001008661 |
| D3A_WT | 2014 | 114666831 | 114667213 | 2.65 | CCDC112  | chr5  | - | -6665 | NM_001040440 |
| D3A_WT | 2013 | 114662496 | 114662715 | 2.36 | CCDC112  | chr5  | - | -2248 | NM_001040440 |
| D3A_WT | 2014 | 114666831 | 114667213 | 2.65 | CCDC112  | chr5  | - | -7136 | NM_152549    |
| D3A_WT | 2013 | 114662496 | 114662715 | 2.36 | CCDC112  | chr5  | - | -2719 | NM_152549    |
| D3A_WT | 953  | 8590335   | 8591014   | 2.97 | CCDC42   | chr17 | - | -1795 | NM_001158261 |
| D3A_WT | 1822 | 130203485 | 130203919 | 2.83 | CCDC48   | chr3  | + | 541   | NM_024768    |
| D3A_WT | 1849 | 192530002 | 192530544 | 2.92 | CCDC50   | chr3  | + | 706   | NM_174908    |
| D3A_WT | 1087 | 77766403  | 77766662  | 2.52 | CCDC57   | chr17 | - | -2554 | NM_198082    |
| D3A_WT | 797  | 721772    | 722617    | 3.67 | CCDC78   | chr16 | - | -5720 | NM_001031737 |
| D3A_WT | 796  | 716441    | 716585    | 2.43 | CCDC78   | chr16 | - | -39   | NM_001031737 |
| D3A_WT | 408  | 63866574  | 63866743  | 2.35 | CCDC88B  | chr11 | + | 2393  | NM_032251    |
| D3A_WT | 566  | 123023736 | 123024285 | 2.89 | CCDC92   | chr12 | - | -894  | NM_025140    |
| D3A_WT | 980  | 29635916  | 29636150  | 2.55 | CCL11    | chr17 | + | -766  | NM_002986    |
| D3A_WT | 982  | 31417089  | 31417218  | 2.63 | CCL18    | chr17 | + | 1398  | NM_002988    |
| D3A_WT | 2423 | 34655289  | 34655876  | 2.93 | CCL27    | chr9  | - | -2893 | NM_006664    |
| D3A_WT | 2098 | 42017334  | 42017803  | 2.11 | CCND3    | chr6  | - | -38   | NM_001136125 |
| D3A_WT | 2443 | 89779441  | 89779790  | 2.38 | CCRK     | chr9  | - | -128  | NM_178432    |
| D3A_WT | 1001 | 39279981  | 39280230  | 2.12 | CD300LG  | chr17 | + | 64    | NM_145273    |
| D3A_WT | 1473 | 160363002 | 160363253 | 3.1  | CD302    | chr2  | - | -115  | NM_014880    |
| D3A_WT | 1088 | 77870527  | 77870771  | 3.24 | CD7      | chr17 | - | -1880 | NM_006137    |
| D3A_WT | 1089 | 77871844  | 77873881  | 2.84 | CD7      | chr17 | - | -4093 | NM_006137    |
| D3A_WT | 2075 | 14226040  | 14226194  | 2.65 | CD83     | chr6  | + | 274   | NM_004233    |
| D3A_WT | 1995 | 54504835  | 54504999  | 2.19 | CDC20B   | chr5  | - | -157  | NM_001145734 |
| D3A_WT | 2465 | 115077770 | 115078094 | 2.46 | CDC26    | chr9  | - | -242  | NM_139286    |
| D3A_WT | 1140 | 484962    | 485601    | 2.93 | CDC34    | chr19 | + | 2549  | NM_004359    |
| D3A_WT | 1989 | 20028633  | 20028990  | 2.71 | CDH18    | chr5  | - | -4701 | NM_004934    |
| D3A_WT | 563  | 122323257 | 122323618 | 2.93 | CDK2AP1  | chr12 | - | -797  | NM_004642    |
| D3A_WT | 1952 | 184602786 | 184603045 | 2.28 | CDKN2AIP | chr4  | + | 133   | NM_017632    |
| D3A_WT | 1236 | 10541043  | 10541192  | 2.08 | CDKN2D   | chr19 | - | -462  | NM_079421    |
| D3A_WT | 1236 | 10541043  | 10541192  | 2.08 | CDKN2D   | chr19 | - | -486  | NM_001800    |
| D3A_WT | 853  | 22293056  | 22293405  | 2.73 | CDR2     | chr16 | - | 209   | NM_001802    |
| D3A_WT | 1541 | 5048566   | 5049020   | 2.03 | CDS2     | chr20 | + | -6688 | NM_003818    |
| D3A_WT | 1826 | 134775285 | 134775714 | 3.01 | CDV3     | chr3  | + | 376   | NM_017548    |
| D3A_WT | 1826 | 134775285 | 134775714 | 3.01 | CDV3     | chr3  | + | -491  | NM_001134423 |
| D3A_WT | 2071 | 4721009   | 4721635   | 2.89 | CDYL     | chr6  | + | -356  | NM_004824    |
| D3A_WT | 1659 | 16032200  | 16032516  | 2.16 | CECR5    | chr22 | - | -6181 | NM_017829    |

|        |      |           |           |      |          |       |   |       |              |
|--------|------|-----------|-----------|------|----------|-------|---|-------|--------------|
| D3A_WT | 1657 | 15980573  | 15982602  | 2.65 | CECR6    | chr22 | - | 670   | NM_001163079 |
| D3A_WT | 1657 | 15980573  | 15982602  | 2.65 | CECR6    | chr22 | - | 626   | NM_031890    |
| D3A_WT | 957  | 16197202  | 16197641  | 2.65 | CENPV    | chr17 | - | 116   | NM_181716    |
| D3A_WT | 1466 | 130996901 | 130997066 | 2.63 | CFC1     | chr2  | + | 1678  | NM_032545    |
| D3A_WT | 1466 | 130996901 | 130997066 | 2.63 | CFC1B    | chr2  | + | 1847  | NM_001079530 |
| D3A_WT | 2563 | 47370977  | 47371126  | 2.81 | CFP      | chrX  | - | 3262  | NM_001145252 |
| D3A_WT | 1407 | 27195400  | 27195934  | 2.96 | CGREF1   | chr2  | - | -390  | NM_001166239 |
| D3A_WT | 1407 | 27195400  | 27195934  | 2.96 | CGREF1   | chr2  | - | -168  | NM_001166240 |
| D3A_WT | 730  | 39032574  | 39033456  | 3.38 | CHAC1    | chr15 | + | 88    | NM_024111    |
| D3A_WT | 1016 | 45898350  | 45899202  | 2.45 | CHAD     | chr17 | - | 2450  | NM_001267    |
| D3A_WT | 1717 | 39964598  | 39964762  | 2.72 | CHADL    | chr22 | - | 2201  | NM_138481    |
| D3A_WT | 44   | 6161697   | 6162061   | 2.46 | CHD5     | chr1  | - | 891   | NM_015557    |
| D3A_WT | 1802 | 53855532  | 53855996  | 2.71 | CHDH     | chr3  | - | -305  | NM_018397    |
| D3A_WT | 468  | 125000591 | 125000735 | 2.38 | CHEK1    | chr11 | + | 418   | NM_001114122 |
| D3A_WT | 468  | 125000591 | 125000735 | 2.38 | CHEK1    | chr11 | + | -858  | NM_001274    |
| D3A_WT | 139  | 111637336 | 111637586 | 2.44 | CHIA     | chr1  | + | 2401  | NM_201653    |
| D3A_WT | 139  | 111637336 | 111637586 | 2.44 | CHIA     | chr1  | + | 2455  | NM_021797    |
| D3A_WT | 1914 | 54625318  | 54625747  | 3.29 | CHIC2    | chr4  | - | 13    | NM_012110    |
| D3A_WT | 1758 | 214957    | 215101    | 2.55 | CHL1     | chr3  | + | 1380  | NM_006614    |
| D3A_WT | 2218 | 29201179  | 29201708  | 3.22 | CHN2     | chr7  | + | 798   | NM_004067    |
| D3A_WT | 1494 | 220118366 | 220121700 | 4.54 | CHPF     | chr2  | - | -3302 | NM_024536    |
| D3A_WT | 1845 | 185580844 | 185581398 | 2.51 | CHRD     | chr3  | + | 567   | NM_003741    |
| D3A_WT | 441  | 74119936  | 74120515  | 3.25 | CHRD2    | chr11 | - | -391  | NM_015424    |
| D3A_WT | 721  | 28472430  | 28472924  | 2.89 | CHRFAM7A | chr15 | - | 479   | NM_139320    |
| D3A_WT | 396  | 46370218  | 46370462  | 2.65 | CHRM4    | chr11 | - | -5657 | NM_000741    |
| D3A_WT | 397  | 46371565  | 46371714  | 2.37 | CHRM4    | chr11 | - | -6956 | NM_000741    |
| D3A_WT | 394  | 46363428  | 46364647  | 5.25 | CHRM4    | chr11 | - | 646   | NM_000741    |
| D3A_WT | 395  | 46368323  | 46368552  | 3.24 | CHRM4    | chr11 | - | -3754 | NM_000741    |
| D3A_WT | 1592 | 61465589  | 61466043  | 3.09 | CHRNA4   | chr20 | - | -2677 | NM_000744    |
| D3A_WT | 390  | 45644035  | 45644199  | 2.67 | CHST1    | chr11 | - | -369  | NM_003654    |
| D3A_WT | 2017 | 129268045 | 129268304 | 2.52 | CHSY3    | chr5  | + | -247  | NM_175856    |
| D3A_WT | 798  | 778442    | 779106    | 3.44 | CHTF18   | chr16 | + | 152   | NM_022092    |
| D3A_WT | 799  | 780852    | 783152    | 2.87 | CHTF18   | chr16 | + | 3380  | NM_022092    |
| D3A_WT | 274  | 101984444 | 101984605 | 2.35 | CHUK     | chr10 | - | -5190 | NM_001278    |
| D3A_WT | 1794 | 50624131  | 50624260  | 2.33 | CISH     | chr3  | - | 71    | NM_145071    |
| D3A_WT | 2444 | 91115466  | 91116491  | 4.36 | CKS2     | chr9  | + | 46    | NM_001827    |
| D3A_WT | 459  | 113152742 | 113152987 | 2.66 | CLDN25   | chr11 | + | -2863 | NM_001101389 |
| D3A_WT | 1662 | 17891250  | 17891594  | 2.49 | CLDN5    | chr22 | - | 1438  | NM_001130861 |
| D3A_WT | 2284 | 138858977 | 138859625 | 2.72 | CLEC2L   | chr7  | + | 88    | NM_001080511 |
| D3A_WT | 2521 | 139011284 | 139011730 | 3.2  | CLIC3    | chr9  | - | -662  | NM_004669    |
| D3A_WT | 1624 | 34963857  | 34964106  | 2.3  | CLIC6    | chr21 | + | 424   | NM_053277    |
| D3A_WT | 2249 | 73341673  | 73342409  | 3.07 | CLIP2    | chr7  | + | 301   | NM_032421    |
| D3A_WT | 2320 | 1698769   | 1698898   | 2.15 | CLN8     | chr8  | + | -443  | NM_018941    |
| D3A_WT | 1978 | 1397704   | 1398178   | 2.24 | CLPTM1L  | chr5  | - | 61    | NM_030782    |
| D3A_WT | 110  | 47572282  | 47572631  | 2.57 | CMPK1    | chr1  | + | 401   | NM_001136140 |
| D3A_WT | 1737 | 45071619  | 45072388  | 3.47 | CN5H6.4  | chr22 | - | -782  | NR_024009    |
| D3A_WT | 279  | 104668567 | 104669441 | 2.71 | CNNM2    | chr10 | + | 901   | NM_199076    |

|        |      |           |           |      |         |       |   |       |              |
|--------|------|-----------|-----------|------|---------|-------|---|-------|--------------|
| D3A_WT | 2063 | 179854134 | 179854573 | 3.56 | CNOT6   | chr5  | + | 331   | NM_015455    |
| D3A_WT | 1921 | 78959150  | 78961025  | 3.11 | CNOT6L  | chr4  | - | -519  | NM_144571    |
| D3A_WT | 1307 | 45424044  | 45425212  | 3.38 | CNTD2   | chr19 | - | -191  | NM_024877    |
| D3A_WT | 1759 | 2115450   | 2116398   | 3    | CNTN4   | chr3  | + | -1322 | NM_175607    |
| D3A_WT | 951  | 7775287   | 7776027   | 2.5  | CNTROB  | chr17 | + | -540  | NM_053051    |
| D3A_WT | 646  | 30413441  | 30414075  | 2.47 | COCH    | chr14 | + | 267   | NM_001135058 |
| D3A_WT | 1646 | 45701182  | 45701306  | 2.48 | COL18A1 | chr21 | + | 1393  | NM_130444    |
| D3A_WT | 1015 | 45631904  | 45632238  | 2.14 | COL1A1  | chr17 | - | 1928  | NM_000088    |
| D3A_WT | 2052 | 177948885 | 177949129 | 2.31 | COL23A1 | chr5  | - | 1155  | NM_173465    |
| D3A_WT | 619  | 109757367 | 109757511 | 2.82 | COL4A1  | chr13 | - | 58    | NM_001845    |
| D3A_WT | 619  | 109757367 | 109757511 | 2.82 | COL4A2  | chr13 | + | -192  | NM_001846    |
| D3A_WT | 1650 | 46344903  | 46345422  | 2.67 | COL6A2  | chr21 | + | 2702  | NM_001849    |
| D3A_WT | 2365 | 120146628 | 120146815 | 2.36 | COLEC10 | chr8  | + | -1883 | NM_006438    |
| D3A_WT | 1097 | 490590    | 491552    | 3.37 | COLEC12 | chr18 | - | -342  | NM_130386    |
| D3A_WT | 256  | 76665405  | 76665649  | 2.34 | COMTD1  | chr10 | - | 249   | NM_144589    |
| D3A_WT | 255  | 76663729  | 76664347  | 3.05 | COMTD1  | chr10 | - | 1738  | NM_144589    |
| D3A_WT | 1262 | 16998272  | 16998421  | 3.02 | CPAMD8  | chr19 | - | 279   | NM_015692    |
| D3A_WT | 1851 | 195553919 | 195554758 | 3.35 | CPN2    | chr3  | - | -988  | NM_001080513 |
| D3A_WT | 923  | 88170101  | 88170560  | 2.67 | CPNE7   | chr16 | + | 654   | NM_153636    |
| D3A_WT | 2402 | 145605638 | 145605867 | 2.31 | CPSF1   | chr8  | - | -211  | NM_013291    |
| D3A_WT | 2403 | 145609915 | 145611495 | 4.45 | CPSF1   | chr8  | - | -5164 | NM_013291    |
| D3A_WT | 404  | 60954055  | 60954419  | 2.65 | CPSF7   | chr11 | - | -197  | NM_001142565 |
| D3A_WT | 404  | 60954055  | 60954419  | 2.65 | CPSF7   | chr11 | - | -278  | NM_024811    |
| D3A_WT | 1754 | 49363271  | 49363720  | 2.55 | CPT1B   | chr22 | - | 249   | NM_004377    |
| D3A_WT | 1754 | 49363271  | 49363720  | 2.55 | CPT1B   | chr22 | - | 467   | NM_152245    |
| D3A_WT | 1754 | 49363271  | 49363720  | 2.55 | CPT1B   | chr22 | - | -123  | NM_001145137 |
| D3A_WT | 1341 | 54883121  | 54883675  | 2.12 | CPT1C   | chr19 | + | -2814 | NM_001136052 |
| D3A_WT | 1341 | 54883121  | 54883675  | 2.12 | CPT1C   | chr19 | + | -2820 | NM_152359    |
| D3A_WT | 756  | 76413965  | 76414119  | 2.31 | CRABP1  | chr15 | + | -5678 | NM_004378    |
| D3A_WT | 813  | 1604230   | 1605271   | 2.3  | CRAMP1L | chr16 | + | 109   | NM_020825    |
| D3A_WT | 2471 | 125158995 | 125159119 | 2.23 | CRB2    | chr9  | + | 789   | NM_173689    |
| D3A_WT | 1220 | 6415665   | 6415804   | 2.03 | CRB3    | chr19 | + | 475   | NM_174881    |
| D3A_WT | 2217 | 28415994  | 28416918  | 2.85 | CREB5   | chr7  | + | -2212 | NM_182898    |
| D3A_WT | 835  | 3870242   | 3870461   | 2.73 | CREBBP  | chr16 | - | -229  | NM_001079846 |
| D3A_WT | 239  | 35455741  | 35456087  | 2.36 | CREM    | chr10 | + | 108   | NM_183013    |
| D3A_WT | 239  | 35455741  | 35456087  | 2.36 | CREM    | chr10 | + | -479  | NM_181571    |
| D3A_WT | 709  | 105007477 | 105007651 | 2.72 | CRIP2   | chr14 | + | -4611 | NM_001312    |
| D3A_WT | 2533 | 1290007   | 1290136   | 2.2  | CRLF2   | chrX  | - | 1456  | NM_001012288 |
| D3A_WT | 2533 | 1290007   | 1290136   | 2.2  | CRLF2   | chrX  | - | 1459  | NM_022148    |
| D3A_WT | 1542 | 5934609   | 5935158   | 2.33 | CRLS1   | chr20 | + | 145   | NM_019095    |
| D3A_WT | 1542 | 5934609   | 5935158   | 2.33 | CRLS1   | chr20 | + | -1014 | NM_001127458 |
| D3A_WT | 771  | 88873875  | 88874737  | 3.51 | CRTC3   | chr15 | + | 105   | NM_022769    |
| D3A_WT | 493  | 10767093  | 10767342  | 3.12 | CSDA    | chr12 | - | 3     | NM_001145426 |
| D3A_WT | 2622 | 1345878   | 1346602   | 3.15 | CSF2RA  | chrY  | + | -1452 | NM_172246    |
| D3A_WT | 2534 | 1345633   | 1347217   | 3.06 | CSF2RA  | chrX  | + | -1267 | NM_172246    |
| D3A_WT | 752  | 72861701  | 72862456  | 2.21 | CSK     | chr15 | + | 601   | NM_004383    |
| D3A_WT | 2321 | 4836671   | 4837285   | 2.67 | CSMD1   | chr8  | - | 2758  | NM_033225    |

|        |      |           |           |      |           |       |   |       |              |
|--------|------|-----------|-----------|------|-----------|-------|---|-------|--------------|
| D3A_WT | 2637 | 24743538  | 24743992  | 2.2  | CSPG4LYP1 | chrY  | - | -999  | NR_001554    |
| D3A_WT | 2637 | 24743538  | 24743992  | 2.2  | CSPG4LYP2 | chrY  | - | -999  | NR_002194    |
| D3A_WT | 1635 | 44020557  | 44020686  | 2.14 | CSTB      | chr21 | - | 66    | NM_000100    |
| D3A_WT | 2613 | 153540106 | 153540950 | 2.16 | CTAG2     | chrX  | - | -5493 | NM_172377    |
| D3A_WT | 2613 | 153540106 | 153540950 | 2.16 | CTAG2     | chrX  | - | -5492 | NM_020994    |
| D3A_WT | 299  | 126839353 | 126840369 | 2.15 | CTBP2     | chr10 | - | -247  | NM_001083914 |
| D3A_WT | 298  | 126837626 | 126837902 | 2.17 | CTBP2     | chr10 | - | 1850  | NM_001083914 |
| D3A_WT | 299  | 126839353 | 126840369 | 2.15 | CTBP2     | chr10 | - | -768  | NM_001329    |
| D3A_WT | 298  | 126837626 | 126837902 | 2.17 | CTBP2     | chr10 | - | 1329  | NM_001329    |
| D3A_WT | 2137 | 132312950 | 132314009 | 3.73 | CTGF      | chr6  | - | 732   | NM_001901    |
| D3A_WT | 916  | 87300544  | 87300673  | 2.46 | CTU2      | chr16 | + | 217   | NM_001012759 |
| D3A_WT | 1228 | 7895330   | 7896211   | 2.38 | CTXN1     | chr19 | - | 1281  | NM_206833    |
| D3A_WT | 2290 | 148026891 | 148027220 | 2.74 | CUL1      | chr7  | + | 190   | NM_003592    |
| D3A_WT | 632  | 112911366 | 112912015 | 2.42 | CUL4A     | chr13 | + | -241  | NM_001008895 |
| D3A_WT | 632  | 112911366 | 112912015 | 2.42 | CUL4A     | chr13 | + | 604   | NM_003589    |
| D3A_WT | 2264 | 101247637 | 101247786 | 2.7  | CUX1      | chr7  | + | 1700  | NM_001913    |
| D3A_WT | 2264 | 101247637 | 101247786 | 2.7  | CUX1      | chr7  | + | 110   | NM_181552    |
| D3A_WT | 2264 | 101247637 | 101247786 | 2.7  | CUX1      | chr7  | + | 1689  | NM_181500    |
| D3A_WT | 243  | 44200072  | 44200491  | 3.18 | CXCL12    | chr10 | - | 267   | NM_000609    |
| D3A_WT | 2589 | 103297680 | 103297934 | 2.35 | CXorf39   | chrX  | + | -149  | NM_207318    |
| D3A_WT | 2581 | 70898689  | 70898998  | 2.57 | CXorf49   | chrX  | + | -1021 | NM_001145140 |
| D3A_WT | 2581 | 70898689  | 70898998  | 2.57 | CXorf49B  | chrX  | + | -1021 | NM_001145139 |
| D3A_WT | 2107 | 84619835  | 84620264  | 3.25 | CYB5R4    | chr6  | + | -6039 | NM_016230    |
| D3A_WT | 2396 | 145221712 | 145223064 | 2.83 | CYC1      | chr8  | + | 441   | NM_001916    |
| D3A_WT | 2397 | 145224590 | 145224864 | 2.26 | CYC1      | chr8  | + | 2780  | NM_001916    |
| D3A_WT | 2381 | 144002172 | 144002521 | 2.83 | CYP11B2   | chr8  | - | -6085 | NM_000498    |
| D3A_WT | 740  | 49421417  | 49421541  | 2.21 | CYP19A1   | chr15 | - | -3392 | NM_000103    |
| D3A_WT | 1413 | 38157115  | 38157744  | 2.2  | CYP1B1    | chr2  | - | -602  | NM_000104    |
| D3A_WT | 1428 | 72228203  | 72228843  | 2.27 | CYP26B1   | chr2  | - | -52   | NM_019885    |
| D3A_WT | 1721 | 40855345  | 40855794  | 2.6  | CYP2D6    | chr22 | - | 1258  | NM_001025161 |
| D3A_WT | 1957 | 187349740 | 187350122 | 3.28 | CYP4V2    | chr4  | + | 264   | NM_207352    |
| D3A_WT | 1329 | 51856033  | 51856177  | 3.25 | DACT3     | chr19 | - | 130   | NM_145056    |
| D3A_WT | 1788 | 49034806  | 49034950  | 2.87 | DALRD3    | chr3  | - | -3857 | NM_001009996 |
| D3A_WT | 1787 | 49030836  | 49031362  | 2.96 | DALRD3    | chr3  | - | -78   | NM_001009996 |
| D3A_WT | 1788 | 49034806  | 49034950  | 2.87 | DALRD3    | chr3  | - | -1407 | NM_018114    |
| D3A_WT | 1787 | 49030836  | 49031362  | 2.96 | DALRD3    | chr3  | - | 2372  | NM_018114    |
| D3A_WT | 1471 | 159354102 | 159354264 | 2.04 | DAPL1     | chr2  | + | -5891 | NM_001017920 |
| D3A_WT | 2594 | 125127124 | 125128298 | 2.47 | DCAF12L2  | chrX  | - | -96   | NM_001013628 |
| D3A_WT | 1251 | 13926145  | 13926389  | 2.22 | DCAF15    | chr19 | + | 1949  | NM_138353    |
| D3A_WT | 1811 | 100102540 | 100102774 | 2.51 | DCBLD2    | chr3  | - | 566   | NM_080927    |
| D3A_WT | 2079 | 24468044  | 24468188  | 2.23 | DCDC2     | chr6  | - | -1857 | NM_016356    |
| D3A_WT | 1945 | 155632736 | 155632900 | 2.04 | DCHS2     | chr4  | - | -491  | NM_001142552 |
| D3A_WT | 1945 | 155632736 | 155632900 | 2.04 | DCHS2     | chr4  | - | -438  | NM_001142553 |
| D3A_WT | 820  | 2241296   | 2241615   | 2.36 | DCI       | chr16 | - | 149   | NM_001919    |
| D3A_WT | 1801 | 53356789  | 53357140  | 2.13 | DCP1A     | chr3  | - | -287  | NM_018403    |
| D3A_WT | 122  | 85703043  | 85703662  | 2.34 | DDAH1     | chr1  | - | 125   | NM_012137    |
| D3A_WT | 573  | 131201263 | 131201850 | 2.94 | DDX51     | chr12 | - | -6723 | NM_175066    |

|        |      |           |           |      |              |       |   |       |              |
|--------|------|-----------|-----------|------|--------------|-------|---|-------|--------------|
| D3A_WT | 327  | 684680    | 685544    | 2.15 | DEAF1        | chr11 | - | 628   | NM_021008    |
| D3A_WT | 166  | 159368853 | 159369406 | 2.75 | DEDD         | chr1  | - | -249  | NM_001039712 |
| D3A_WT | 166  | 159368853 | 159369406 | 2.75 | DEDD         | chr1  | - | -27   | NM_001039711 |
| D3A_WT | 928  | 88540864  | 88541123  | 2.52 | DEF8         | chr16 | + | -1658 | NM_017702    |
| D3A_WT | 928  | 88540864  | 88541123  | 2.52 | DEF8         | chr16 | + | -1690 | NM_207514    |
| D3A_WT | 1661 | 17489330  | 17490269  | 2.77 | DGCR2        | chr22 | - | 168   | NM_005137    |
| D3A_WT | 1505 | 233927793 | 233928162 | 2.29 | DGKD         | chr2  | + | 86    | NM_152879    |
| D3A_WT | 2282 | 137182383 | 137183308 | 2.76 | DGKI         | chr7  | - | -696  | NM_004717    |
| D3A_WT | 1867 | 956953    | 957701    | 2.61 | DGKQ         | chr4  | - | 17    | NM_001347    |
| D3A_WT | 603  | 51276168  | 51276392  | 3.22 | DHRS12       | chr13 | - | -45   | NM_001031719 |
| D3A_WT | 603  | 51276168  | 51276392  | 3.22 | DHRS12       | chr13 | - | 14    | NM_024705    |
| D3A_WT | 2543 | 2428847   | 2429753   | 2.85 | DHRSX        | chrX  | - | -285  | NM_145177    |
| D3A_WT | 561  | 121276763 | 121277086 | 2.47 | DIABLO       | chr12 | - | 1097  | NM_138929    |
| D3A_WT | 514  | 49185067  | 49185206  | 2.14 | DIP2B        | chr12 | + | 102   | NM_173602    |
| D3A_WT | 221  | 724832    | 725957    | 2.4  | DIP2C        | chr10 | - | 214   | NM_014974    |
| D3A_WT | 222  | 732033    | 732583    | 2.61 | DIP2C        | chr10 | - | -6700 | NM_014974    |
| D3A_WT | 2446 | 92444788  | 92445037  | 2.62 | DIRAS2       | chr9  | - | 16    | NM_017594    |
| D3A_WT | 1817 | 123996952 | 123997601 | 2.58 | DIRC2        | chr3  | + | 686   | NM_032839    |
| D3A_WT | 2614 | 153644318 | 153644462 | 2.83 | DKC1         | chrX  | + | 166   | NM_001363    |
| D3A_WT | 876  | 54782448  | 54783128  | 3.14 | DKFZP434H168 | chr16 | - | 3150  | NR_026889    |
| D3A_WT | 418  | 65304952  | 65305782  | 2.48 | DKFZp761E198 | chr11 | - | -969  | NM_138368    |
| D3A_WT | 375  | 11986695  | 11987412  | 2.72 | DKK3         | chr11 | - | 152   | NM_015881    |
| D3A_WT | 375  | 11986695  | 11987412  | 2.72 | DKK3         | chr11 | - | -291  | NM_001018057 |
| D3A_WT | 375  | 11986695  | 11987412  | 2.72 | DKK3         | chr11 | - | 440   | NM_013253    |
| D3A_WT | 601  | 49601713  | 49602639  | 2.95 | DLEU2        | chr13 | - | -4498 | NR_002612    |
| D3A_WT | 947  | 7070974   | 7071398   | 2.41 | DLG4         | chr17 | - | -7093 | NM_001365    |
| D3A_WT | 2167 | 170440431 | 170441066 | 3.57 | DLL1         | chr6  | - | 874   | NM_005618    |
| D3A_WT | 2412 | 967062    | 967481    | 2.33 | DMRT3        | chr9  | + | 308   | NM_021240    |
| D3A_WT | 113  | 50659762  | 50660122  | 3.16 | DMRTA2       | chr1  | - | 1787  | NM_032110    |
| D3A_WT | 1315 | 47040258  | 47040417  | 2.07 | DMRTC2       | chr19 | + | -588  | NM_001040283 |
| D3A_WT | 565  | 122812510 | 122813254 | 4.55 | DNAH10       | chr12 | + | -112  | NM_207437    |
| D3A_WT | 63   | 15723508  | 15724249  | 3.9  | DNAJC16      | chr1  | + | -2060 | NM_015291    |
| D3A_WT | 819  | 2223991   | 2227048   | 3.51 | DNASE1L2     | chr16 | + | -949  | NM_001374    |
| D3A_WT | 1500 | 230287846 | 230288090 | 2.65 | DNER         | chr2  | - | -438  | NM_139072    |
| D3A_WT | 1237 | 10689734  | 10690503  | 3.33 | DNM2         | chr19 | + | 364   | NM_004945    |
| D3A_WT | 1636 | 44507104  | 44507458  | 2.78 | DNMT3L       | chr21 | - | -754  | NM_175867    |
| D3A_WT | 126  | 94116744  | 94117080  | 3.09 | DNTTIP2      | chr1  | - | 418   | NM_014597    |
| D3A_WT | 2329 | 21832368  | 21833597  | 2.64 | DOK2         | chr8  | - | -5831 | NM_003974    |
| D3A_WT | 1572 | 52525466  | 52525645  | 2.16 | DOK5         | chr20 | + | -117  | NM_018431    |
| D3A_WT | 1887 | 3434761   | 3435088   | 3.13 | DOK7         | chr4  | + | 94    | NM_173660    |
| D3A_WT | 1183 | 2116180   | 2116614   | 2.66 | DOT1L        | chr19 | + | 1250  | NM_032482    |
| D3A_WT | 1182 | 2115078   | 2115300   | 2.12 | DOT1L        | chr19 | + | 42    | NM_032482    |
| D3A_WT | 661  | 72429544  | 72429673  | 2.54 | DPF3         | chr14 | - | 954   | NM_012074    |
| D3A_WT | 977  | 26322212  | 26322461  | 2.59 | DPRXP4       | chr17 | + | -4142 | NR_002221    |
| D3A_WT | 1287 | 37588537  | 37588916  | 2.78 | DPY19L3      | chr19 | + | -144  | NM_207325    |
| D3A_WT | 458  | 112851175 | 112851807 | 3.39 | DRD2         | chr11 | - | -280  | NM_016574    |
| D3A_WT | 2366 | 120936718 | 120937467 | 2.36 | DSCC1        | chr8  | - | 259   | NM_024094    |

|        |      |           |           |      |         |       |   |       |              |
|--------|------|-----------|-----------|------|---------|-------|---|-------|--------------|
| D3A_WT | 1627 | 37562127  | 37562251  | 2.85 | DSCR3   | chr21 | - | -486  | NM_006052    |
| D3A_WT | 2131 | 116798912 | 116799061 | 2.23 | DSE     | chr6  | + | 184   | NM_013352    |
| D3A_WT | 1560 | 34839692  | 34840146  | 3.47 | DSN1    | chr20 | - | -4351 | NM_024918    |
| D3A_WT | 1560 | 34839692  | 34840146  | 3.47 | DSN1    | chr20 | - | -4275 | NM_001145317 |
| D3A_WT | 2104 | 56927609  | 56927948  | 3.79 | DST     | chr6  | - | -406  | NM_001144769 |
| D3A_WT | 1549 | 17498615  | 17499059  | 3.13 | DSTN    | chr20 | + | 239   | NM_006870    |
| D3A_WT | 735  | 43209482  | 43209706  | 2.52 | DUOX1   | chr15 | + | 111   | NM_175940    |
| D3A_WT | 735  | 43209482  | 43209706  | 2.52 | DUOXA1  | chr15 | - | -245  | NM_144565    |
| D3A_WT | 1083 | 77616667  | 77616926  | 2.24 | DUS1L   | chr17 | - | 173   | NM_022156    |
| D3A_WT | 163  | 158017209 | 158017858 | 2.66 | DUSP23  | chr1  | + | 151   | NM_017823    |
| D3A_WT | 535  | 88271740  | 88271874  | 2.11 | DUSP6   | chr12 | - | -1380 | NM_022652    |
| D3A_WT | 340  | 1549665   | 1550512   | 2.2  | DUSP8   | chr11 | - | -362  | NM_004420    |
| D3A_WT | 2602 | 152561014 | 152562333 | 3.72 | DUSP9   | chrX  | + | 583   | NM_001395    |
| D3A_WT | 14   | 1280314   | 1280886   | 3.27 | DVL1    | chr1  | - | -6245 | NM_004421    |
| D3A_WT | 688  | 101500745 | 101501014 | 2.43 | DYNC1H1 | chr14 | + | 262   | NM_001376    |
| D3A_WT | 2353 | 86276895  | 86277449  | 2.39 | E2F5    | chr8  | + | 302   | NM_001951    |
| D3A_WT | 818  | 2213768   | 2213927   | 2.29 | E4F1    | chr16 | + | 280   | NM_004424    |
| D3A_WT | 300  | 131651909 | 131652759 | 2.47 | EBF3    | chr10 | - | -253  | NM_001005463 |
| D3A_WT | 1539 | 2621918   | 2622577   | 2.74 | EBF4    | chr20 | + | 724   | NM_001110514 |
| D3A_WT | 1503 | 233059404 | 233060038 | 2.15 | ECEL1   | chr2  | - | 1055  | NM_004826    |
| D3A_WT | 608  | 77391448  | 77391587  | 2.38 | EDNRB   | chr13 | - | -550  | NM_003991    |
| D3A_WT | 537  | 91847465  | 91847689  | 2.16 | EEA1    | chr12 | - | -339  | NM_003566    |
| D3A_WT | 1596 | 61598797  | 61599216  | 3.14 | EEF1A2  | chr20 | - | 1943  | NM_001958    |
| D3A_WT | 2267 | 105010904 | 105011223 | 2.36 | EFCAB10 | chr7  | - | -1851 | NR_027068    |
| D3A_WT | 1164 | 1237099   | 1237318   | 2.38 | EFNA2   | chr19 | + | 41    | NM_001405    |
| D3A_WT | 1163 | 1233695   | 1234219   | 2.78 | EFNA2   | chr19 | + | -3210 | NM_001405    |
| D3A_WT | 2576 | 67965558  | 67966202  | 3.47 | EFNB1   | chrX  | + | 316   | NM_004429    |
| D3A_WT | 207  | 229624273 | 229624697 | 2.6  | EGLN1   | chr1  | - | 2928  | NM_022051    |
| D3A_WT | 1313 | 45996802  | 45997247  | 3.22 | EGLN2   | chr19 | + | -996  | NM_053046    |
| D3A_WT | 1314 | 45999115  | 45999254  | 2.83 | EGLN2   | chr19 | + | 1164  | NM_053046    |
| D3A_WT | 1313 | 45996802  | 45997247  | 3.22 | EGLN2   | chr19 | + | 137   | NM_080732    |
| D3A_WT | 1314 | 45999115  | 45999254  | 2.83 | EGLN2   | chr19 | + | 2297  | NM_080732    |
| D3A_WT | 2550 | 20069852  | 20070224  | 3.49 | EIF1AX  | chrX  | - | -151  | NM_001412    |
| D3A_WT | 1771 | 40326904  | 40327037  | 2.3  | EIF1B   | chr3  | + | 794   | NM_005875    |
| D3A_WT | 1833 | 151746656 | 151747175 | 3.41 | EIF2A   | chr3  | + | -348  | NM_032025    |
| D3A_WT | 1438 | 88707376  | 88708355  | 2.75 | EIF2AK3 | chr2  | - | 244   | NM_004836    |
| D3A_WT | 2374 | 141714649 | 141715505 | 3.91 | EIF2C2  | chr8  | - | -249  | NM_001164623 |
| D3A_WT | 1233 | 10091057  | 10091785  | 3.53 | EIF3G   | chr19 | - | 178   | NM_003755    |
| D3A_WT | 2045 | 175989985 | 175990249 | 2.78 | EIF4E1B | chr5  | + | -171  | NM_001099408 |
| D3A_WT | 1843 | 185515380 | 185516215 | 2.55 | EIF4G1  | chr3  | + | 748   | NM_198241    |
| D3A_WT | 1843 | 185515380 | 185516215 | 2.55 | EIF4G1  | chr3  | + | -5159 | NM_004953    |
| D3A_WT | 1843 | 185515380 | 185516215 | 2.55 | EIF4G1  | chr3  | + | 133   | NM_182917    |
| D3A_WT | 71   | 21375442  | 21376297  | 3.37 | EIF4G3  | chr1  | - | 58    | NM_003760    |
| D3A_WT | 692  | 102869978 | 102871320 | 2.37 | EIF5    | chr14 | + | -339  | NM_183004    |
| D3A_WT | 692  | 102869978 | 102871320 | 2.37 | EIF5    | chr14 | + | 404   | NM_001969    |
| D3A_WT | 1151 | 797605    | 797729    | 2.41 | ELANE   | chr19 | + | -5623 | NM_001972    |
| D3A_WT | 184  | 203867632 | 203868171 | 3.22 | ELK4    | chr1  | - | 722   | NM_001973    |

|        |      |           |           |      |          |       |   |       |              |
|--------|------|-----------|-----------|------|----------|-------|---|-------|--------------|
| D3A_WT | 453  | 106968787 | 106968968 | 2.28 | ELMOD1   | chr11 | + | 1851  | NM_001130037 |
| D3A_WT | 1434 | 85435254  | 85435608  | 3.01 | ELMOD3   | chr2  | + | 78    | NM_001135023 |
| D3A_WT | 1254 | 14650057  | 14650410  | 2.93 | EMR3     | chr19 | - | -3503 | NM_032571    |
| D3A_WT | 1429 | 72998544  | 72999593  | 2.84 | EMX1     | chr2  | + | 957   | NM_004097    |
| D3A_WT | 2002 | 73972594  | 73973336  | 2.58 | ENC1     | chr5  | - | 40    | NM_003633    |
| D3A_WT | 943  | 4792983   | 4794220   | 2.65 | ENO3     | chr17 | + | -1529 | NM_053013    |
| D3A_WT | 1716 | 39817855  | 39818618  | 2.99 | EP300    | chr22 | + | -323  | NM_001429    |
| D3A_WT | 1418 | 46378101  | 46378942  | 3.5  | EPAS1    | chr2  | + | 477   | NM_001430    |
| D3A_WT | 1498 | 222146356 | 222146805 | 2.3  | EPHA4    | chr2  | - | -1326 | NM_004438    |
| D3A_WT | 74   | 22762224  | 22763551  | 2.67 | EPHA8    | chr1  | + | 297   | NM_020526    |
| D3A_WT | 125  | 92267948  | 92268202  | 2.13 | EPHX4    | chr1  | + | -45   | NM_173567    |
| D3A_WT | 2146 | 146098131 | 146098480 | 2.28 | EPM2A    | chr6  | - | 379   | NM_001018041 |
| D3A_WT | 2394 | 145018297 | 145019341 | 2.88 | EPPK1    | chr8  | - | 603   | NM_031308    |
| D3A_WT | 115  | 51757107  | 51757356  | 2.45 | EPS15    | chr1  | - | 352   | NM_001981    |
| D3A_WT | 596  | 42464495  | 42464649  | 2.51 | EPSTI1   | chr13 | - | -195  | NM_001002264 |
| D3A_WT | 2000 | 65257860  | 65257994  | 2.19 | ERBB2IP  | chr5  | + | -212  | NM_001006600 |
| D3A_WT | 519  | 51950716  | 51951142  | 2.77 | ESPL1    | chr12 | + | 2580  | NM_012291    |
| D3A_WT | 45   | 6401366   | 6401820   | 2.95 | ESPN     | chr1  | + | -5841 | NM_031475    |
| D3A_WT | 46   | 6407273   | 6407619   | 2.87 | ESPN     | chr1  | + | 12    | NM_031475    |
| D3A_WT | 162  | 155374535 | 155375384 | 2.5  | ETV3     | chr1  | - | -158  | NM_005240    |
| D3A_WT | 162  | 155374535 | 155375384 | 2.5  | ETV3     | chr1  | - | 48    | NM_001145312 |
| D3A_WT | 1000 | 38978575  | 38978724  | 2.16 | ETV4     | chr17 | - | 182   | NM_001986    |
| D3A_WT | 1000 | 38978575  | 38978724  | 2.16 | ETV4     | chr17 | - | 639   | NM_001079675 |
| D3A_WT | 1915 | 56414496  | 56414750  | 2.1  | EXOC1    | chr4  | + | 51    | NM_178237    |
| D3A_WT | 1964 | 495892    | 496610    | 3.07 | EXOC3    | chr5  | + | -82   | NM_007277    |
| D3A_WT | 891  | 68843068  | 68843912  | 2.44 | EXOSC6   | chr16 | - | -156  | NM_058219    |
| D3A_WT | 387  | 44073876  | 44074330  | 2.39 | EXT2     | chr11 | + | 429   | NM_000401    |
| D3A_WT | 2291 | 148211664 | 148212214 | 2.33 | EZH2     | chr7  | - | 408   | NM_152998    |
| D3A_WT | 2005 | 76047642  | 76048116  | 3.35 | F2R      | chr5  | + | 256   | NM_001992    |
| D3A_WT | 405  | 61353523  | 61353872  | 2.89 | FADS2    | chr11 | + | 1409  | NM_004265    |
| D3A_WT | 760  | 78774287  | 78774416  | 2.54 | FAM108C1 | chr15 | + | -355  | NM_021214    |
| D3A_WT | 2168 | 170457762 | 170458116 | 2.45 | FAM120B  | chr6  | + | 171   | NM_032448    |
| D3A_WT | 2574 | 63342159  | 63342510  | 2.5  | FAM123B  | chrX  | - | 15    | NM_152424    |
| D3A_WT | 2476 | 128128849 | 128128998 | 2.43 | FAM125B  | chr9  | + | -25   | NM_033446    |
| D3A_WT | 1844 | 185536335 | 185536970 | 2.24 | FAM131A  | chr3  | + | -4299 | NM_144635    |
| D3A_WT | 2372 | 139575970 | 139576137 | 2.63 | FAM135B  | chr8  | - | 2194  | NM_015912    |
| D3A_WT | 1389 | 277972    | 279119    | 3.4  | FAM150B  | chr2  | - | -237  | NM_001002919 |
| D3A_WT | 642  | 23686921  | 23687170  | 2.51 | FAM158A  | chr14 | - | -6408 | NM_016049    |
| D3A_WT | 1467 | 131567094 | 131567323 | 2.1  | FAM168B  | chr2  | - | 266   | NM_001009993 |
| D3A_WT | 2003 | 74197515  | 74197849  | 2.47 | FAM169A  | chr5  | - | 689   | NM_015566    |
| D3A_WT | 93   | 36560850  | 36561968  | 2.54 | FAM176B  | chr1  | - | 933   | NM_018166    |
| D3A_WT | 1552 | 25984274  | 25984648  | 2.94 | FAM182A  | chr20 | + | 1212  | NR_026713    |
| D3A_WT | 719  | 27650259  | 27650578  | 2.88 | FAM189A1 | chr15 | - | -199  | NM_015307    |
| D3A_WT | 1926 | 91267666  | 91268584  | 2.68 | FAM190A  | chr4  | + | 419   | NM_001145065 |
| D3A_WT | 791  | 631593    | 632329    | 3.41 | FAM195A  | chr16 | + | 112   | NM_138418    |
| D3A_WT | 790  | 623567    | 624646    | 2.56 | FAM195A  | chr16 | + | -7743 | NM_138418    |
| D3A_WT | 2628 | 9974079   | 9975173   | 3.08 | FAM197Y2 | chrY  | - | -1749 | NR_001553    |



|        |      |           |           |      |         |       |   |       |              |
|--------|------|-----------|-----------|------|---------|-------|---|-------|--------------|
| D3A_WT | 1743 | 47263856  | 47265009  | 3.32 | FAM19A5 | chr22 | + | 481   | NM_001082967 |
| D3A_WT | 2170 | 286928    | 287062    | 2.62 | FAM20C  | chr7  | + | -1056 | NM_020223    |
| D3A_WT | 262  | 89104680  | 89105305  | 3    | FAM22D  | chr10 | + | -2464 | NM_001009610 |
| D3A_WT | 2434 | 67382092  | 67383101  | 3.39 | FAM27B  | chr9  | - | 1413  | NR_027422    |
| D3A_WT | 971  | 21750112  | 21750666  | 3.02 | FAM27L  | chr17 | + | 893   | NR_028336    |
| D3A_WT | 1852 | 195889724 | 195890183 | 2.48 | FAM43A  | chr3  | + | 2043  | NM_153690    |
| D3A_WT | 2518 | 138726683 | 138727012 | 2.79 | FAM69B  | chr9  | + | 3     | NM_152421    |
| D3A_WT | 1347 | 55674730  | 55675172  | 2.76 | FAM71E1 | chr19 | - | -3136 | NM_138411    |
| D3A_WT | 1367 | 60567221  | 60567370  | 2.04 | FAM71E2 | chr19 | - | -863  | NM_001145402 |
| D3A_WT | 2428 | 39887827  | 39887986  | 2.79 | FAM74A1 | chr9  | + | -2293 | NR_026803    |
| D3A_WT | 2498 | 133142234 | 133142458 | 2.62 | FAM78A  | chr9  | - | -619  | NM_033387    |
| D3A_WT | 2499 | 133147736 | 133147948 | 2.99 | FAM78A  | chr9  | - | -6115 | NM_033387    |
| D3A_WT | 722  | 28652334  | 28652533  | 2.34 | FAM7A1  | chr15 | + | 384   | NR_026858    |
| D3A_WT | 722  | 28652334  | 28652533  | 2.34 | FAM7A2  | chr15 | + | 384   | NR_027470    |
| D3A_WT | 963  | 18854420  | 18854571  | 2.23 | FAM83G  | chr17 | - | -5710 | NM_001039999 |
| D3A_WT | 2390 | 144894235 | 144894484 | 2.25 | FAM83H  | chr8  | - | -6457 | NM_198488    |
| D3A_WT | 2077 | 17708270  | 17709025  | 2.62 | FAM8A1  | chr6  | + | 151   | NM_016255    |
| D3A_WT | 491  | 8269086   | 8269416   | 2.34 | FAM90A1 | chr12 | - | 2230  | NM_018088    |
| D3A_WT | 377  | 13646362  | 13647217  | 2.35 | FAR1    | chr11 | + | 8     | NM_032228    |
| D3A_WT | 615  | 97594117  | 97594297  | 2.37 | FARP1   | chr13 | + | 773   | NM_005766    |
| D3A_WT | 1085 | 77649936  | 77650501  | 2.18 | FASN    | chr17 | - | -823  | NM_004104    |
| D3A_WT | 2037 | 167888832 | 167889961 | 2.88 | FBLL1   | chr5  | + | 237   | NR_024356    |
| D3A_WT | 477  | 1573303   | 1573657   | 2.99 | FBXL14  | chr12 | - | 112   | NM_152441    |
| D3A_WT | 2011 | 107745428 | 107745862 | 2.58 | FBXL17  | chr5  | - | 53    | NM_001163315 |
| D3A_WT | 861  | 30844521  | 30844770  | 3    | FBXL19  | chr16 | + | 1249  | NM_001099784 |
| D3A_WT | 988  | 34811533  | 34811757  | 2.47 | FBXL20  | chr17 | - | -243  | NM_032875    |
| D3A_WT | 1898 | 15265706  | 15266255  | 3.27 | FBXL5   | chr4  | - | 131   | NM_012161    |
| D3A_WT | 229  | 5971252   | 5972504   | 2.66 | FBXO18  | chr10 | + | -341  | NM_178150    |
| D3A_WT | 229  | 5971252   | 5972504   | 2.66 | FBXO18  | chr10 | + | -4476 | NM_032807    |
| D3A_WT | 1301 | 44214834  | 44215063  | 2.4  | FBXO27  | chr19 | - | 90    | NM_178820    |
| D3A_WT | 1425 | 68547801  | 68548273  | 2.83 | FBXO48  | chr2  | - | -143  | NM_001024680 |
| D3A_WT | 2520 | 138958325 | 138959045 | 2.99 | FBXW5   | chr9  | - | 309   | NM_018998    |
| D3A_WT | 1942 | 153676024 | 153677778 | 3.28 | FBXW7   | chr4  | - | -1279 | NM_033632    |
| D3A_WT | 168  | 159741967 | 159742127 | 2.06 | FCGR2A  | chr1  | + | 219   | NM_021642    |
| D3A_WT | 1441 | 96667644  | 96668123  | 3.55 | FER1L5  | chr2  | + | -4417 | NM_001113382 |
| D3A_WT | 1545 | 6051789   | 6051938   | 2.58 | FERMT1  | chr20 | - | 328   | NM_017671    |
| D3A_WT | 467  | 124871220 | 124871769 | 2.83 | FEZ1    | chr11 | - | -161  | NM_005103    |
| D3A_WT | 617  | 101856447 | 101856895 | 2.7  | FGF14   | chr13 | - | -4546 | NM_175929    |
| D3A_WT | 432  | 69341034  | 69343301  | 2.56 | FGF3    | chr11 | - | 962   | NM_005247    |
| D3A_WT | 1900 | 15551449  | 15551908  | 3.2  | FGFBP1  | chr4  | - | -2609 | NM_005130    |
| D3A_WT | 295  | 123347909 | 123348188 | 2.45 | FGFR2   | chr10 | - | -4286 | NM_001144916 |
| D3A_WT | 295  | 123347909 | 123348188 | 2.45 | FGFR2   | chr10 | - | -1899 | NM_001144915 |
| D3A_WT | 295  | 123347909 | 123348188 | 2.45 | FGFR2   | chr10 | - | -86   | NM_001144918 |
| D3A_WT | 295  | 123347909 | 123348188 | 2.45 | FGFR2   | chr10 | - | -4577 | NM_001144914 |
| D3A_WT | 1878 | 1758547   | 1759780   | 3.07 | FGFR3   | chr4  | + | -5673 | NM_022965    |
| D3A_WT | 1943 | 154076794 | 154078715 | 2.98 | FHDC1   | chr4  | + | -5830 | NM_033393    |
| D3A_WT | 96   | 38243365  | 38243532  | 2.09 | FHL3    | chr1  | - | 373   | NM_004468    |

|        |      |           |           |      |          |       |   |       |              |
|--------|------|-----------|-----------|------|----------|-------|---|-------|--------------|
| D3A_WT | 884  | 65840033  | 65840781  | 2.35 | FHOD1    | chr16 | - | -1481 | NM_013241    |
| D3A_WT | 2497 | 132809059 | 132809284 | 2.12 | FIBCD1   | chr9  | - | -4895 | NM_001145106 |
| D3A_WT | 2497 | 132809059 | 132809284 | 2.12 | FIBCD1   | chr9  | - | -5111 | NM_032843    |
| D3A_WT | 385  | 35596799  | 35597113  | 2.73 | FJX1     | chr11 | + | 646   | NM_014344    |
| D3A_WT | 2086 | 32203903  | 32204043  | 2.71 | FKBPL    | chr6  | - | 2072  | NM_022110    |
| D3A_WT | 174  | 178430105 | 178430554 | 3.26 | FLJ23867 | chr1  | + | -3437 | NR_026900    |
| D3A_WT | 1675 | 19679570  | 19679994  | 2.99 | FLJ39582 | chr22 | + | -6428 | NR_027052    |
| D3A_WT | 1676 | 19680745  | 19681089  | 2.32 | FLJ39582 | chr22 | + | -5293 | NR_027052    |
| D3A_WT | 1325 | 50693125  | 50694289  | 2.67 | FLJ40125 | chr19 | + | 137   | NM_001080401 |
| D3A_WT | 32   | 2977403   | 2977577   | 2.19 | FLJ42875 | chr1  | - | -3341 | NR_024371    |
| D3A_WT | 31   | 2974705   | 2975471   | 2.09 | FLJ42875 | chr1  | - | -939  | NR_024371    |
| D3A_WT | 2085 | 30820385  | 30820509  | 2.39 | FLOT1    | chr6  | - | -2015 | NM_005803    |
| D3A_WT | 668  | 85067961  | 85070155  | 3.65 | FLRT2    | chr14 | + | 2818  | NM_013231    |
| D3A_WT | 828  | 2895211   | 2895570   | 2.68 | FLYWCH1  | chr16 | + | -6590 | NM_032296    |
| D3A_WT | 2340 | 43030610  | 43031259  | 2.27 | FNTA     | chr8  | + | 336   | NM_001018677 |
| D3A_WT | 420  | 65423293  | 65424565  | 2.93 | FOSL1    | chr11 | - | 644   | NM_005438    |
| D3A_WT | 2439 | 78825490  | 78825759  | 2.73 | FOXB2    | chr9  | + | 1234  | NM_001013735 |
| D3A_WT | 2001 | 72779190  | 72779609  | 2.92 | FOXD1    | chr5  | - | 709   | NM_004472    |
| D3A_WT | 2038 | 169464527 | 169466143 | 3.35 | FOXI1    | chr5  | + | -159  | NM_144769    |
| D3A_WT | 107  | 42573393  | 42574158  | 2.97 | FOXJ3    | chr1  | - | -285  | NM_014947    |
| D3A_WT | 595  | 40138184  | 40139215  | 3.58 | FOXO1    | chr13 | - | 35    | NM_002015    |
| D3A_WT | 2127 | 108987744 | 108988668 | 3.03 | FOXO3    | chr6  | + | 488   | NM_201559    |
| D3A_WT | 2127 | 108987744 | 108988668 | 3.03 | FOXO3    | chr6  | + | -555  | NM_001455    |
| D3A_WT | 2569 | 49013554  | 49013816  | 2.57 | FOXP3    | chrX  | - | -5453 | NM_001114377 |
| D3A_WT | 2068 | 1257600   | 1257834   | 2.49 | FOXQ1    | chr6  | + | 43    | NM_033260    |
| D3A_WT | 1922 | 79197588  | 79198239  | 2.78 | FRAS1    | chr4  | + | 166   | NM_025074    |
| D3A_WT | 651  | 51188912  | 51189146  | 2.9  | FRMD6    | chr14 | + | 704   | NM_152330    |
| D3A_WT | 1075 | 77108726  | 77111395  | 3.48 | FSCN2    | chr17 | + | 49    | NM_012418    |
| D3A_WT | 1205 | 4256123   | 4256755   | 2.74 | FSD1     | chr19 | + | 849   | NM_024333    |
| D3A_WT | 1408 | 27469384  | 27469733  | 2.34 | FTHL3P   | chr2  | - | 389   | NR_002201    |
| D3A_WT | 75   | 24067265  | 24067634  | 2.87 | FUCA1    | chr1  | - | -3    | NM_000147    |
| D3A_WT | 449  | 93917077  | 93918126  | 2.5  | FUT4     | chr11 | + | 937   | NM_002033    |
| D3A_WT | 2522 | 139045598 | 139045832 | 2.71 | FUT7     | chr9  | - | 1398  | NM_004479    |
| D3A_WT | 1290 | 40314827  | 40315751  | 4.57 | FXYD1    | chr19 | + | -6942 | NM_005031    |
| D3A_WT | 1291 | 40324498  | 40324667  | 2.58 | FXYD1    | chr19 | + | 2351  | NM_005031    |
| D3A_WT | 1290 | 40314827  | 40315751  | 4.57 | FXYD1    | chr19 | + | -6282 | NM_021902    |
| D3A_WT | 1291 | 40324498  | 40324667  | 2.58 | FXYD1    | chr19 | + | 3011  | NM_021902    |
| D3A_WT | 1291 | 40324498  | 40324667  | 2.58 | FXYD7    | chr19 | + | -1411 | NM_022006    |
| D3A_WT | 2254 | 90731832  | 90731991  | 2.06 | FZD1     | chr7  | + | 193   | NM_003505    |
| D3A_WT | 187  | 207915309 | 207915963 | 2.99 | GOS2     | chr1  | + | 344   | NM_015714    |
| D3A_WT | 1913 | 46729367  | 46729516  | 2.04 | GABRB1   | chr4  | + | 1390  | NM_000812    |
| D3A_WT | 20   | 1940934   | 1941283   | 2.2  | GABRD    | chr1  | + | 481   | NM_000815    |
| D3A_WT | 1479 | 171378378 | 171378602 | 2.7  | GAD1     | chr2  | + | -2955 | NM_000817    |
| D3A_WT | 669  | 87528750  | 87529811  | 3.96 | GALC     | chr14 | - | 380   | NM_000153    |
| D3A_WT | 574  | 131253557 | 131253981 | 3.49 | GALNT9   | chr12 | - | 2757  | NM_021808    |
| D3A_WT | 1373 | 61378135  | 61378650  | 2.79 | GALP     | chr19 | + | -808  | NM_033106    |
| D3A_WT | 382  | 22644949  | 22645299  | 2.02 | GAS2     | chr11 | + | -1105 | NM_177553    |

|        |      |           |           |      |         |       |   |       |              |
|--------|------|-----------|-----------|------|---------|-------|---|-------|--------------|
| D3A_WT | 382  | 22644949  | 22645299  | 2.02 | GAS2    | chr11 | + | 389   | NM_001143830 |
| D3A_WT | 1691 | 28034208  | 28036852  | 3.56 | GAS2L1  | chr22 | + | 2534  | NM_152236    |
| D3A_WT | 1585 | 60484755  | 60485289  | 2.65 | GATA5   | chr20 | - | -601  | NM_080473    |
| D3A_WT | 1274 | 19357458  | 19358007  | 3.63 | GATAD2A | chr19 | + | 91    | NM_017660    |
| D3A_WT | 1509 | 236746560 | 236746834 | 2.69 | GBX2    | chr2  | - | -5306 | NM_001485    |
| D3A_WT | 141  | 118278941 | 118279214 | 2.43 | GDAP2   | chr1  | - | -5252 | NM_017686    |
| D3A_WT | 228  | 5895042   | 5896477   | 3.01 | GDI2    | chr10 | - | -241  | NM_001115156 |
| D3A_WT | 1992 | 37875789  | 37876208  | 2.54 | GDNF    | chr5  | - | -459  | NM_000514    |
| D3A_WT | 1992 | 37875789  | 37876208  | 2.54 | GDNF    | chr5  | - | -5343 | NM_199234    |
| D3A_WT | 1992 | 37875789  | 37876208  | 2.54 | GDNF    | chr5  | - | -4648 | NM_199231    |
| D3A_WT | 1323 | 50266558  | 50267179  | 2.67 | GEMIN7  | chr19 | + | -7489 | NM_001007270 |
| D3A_WT | 1323 | 50266558  | 50267179  | 2.67 | GEMIN7  | chr19 | + | -7501 | NM_001007269 |
| D3A_WT | 1400 | 17798244  | 17798918  | 2.66 | GEN1    | chr2  | + | -313  | NM_001130009 |
| D3A_WT | 1400 | 17798244  | 17798918  | 2.66 | GEN1    | chr2  | + | -76   | NM_182625    |
| D3A_WT | 2074 | 13595123  | 13595477  | 2.5  | GFOD1   | chr6  | - | 466   | NM_018988    |
| D3A_WT | 888  | 66310552  | 66310901  | 2.53 | GFOD2   | chr16 | - | 48    | NM_030819    |
| D3A_WT | 2062 | 179712439 | 179713470 | 2.71 | GFPT2   | chr5  | - | -33   | NM_005110    |
| D3A_WT | 1540 | 3589577   | 3589706   | 2.18 | GFRA4   | chr20 | - | 2405  | NM_145762    |
| D3A_WT | 983  | 31974104  | 31975563  | 2.13 | GGNBP2  | chr17 | + | -83   | NM_024835    |
| D3A_WT | 1504 | 233270212 | 233270366 | 2.8  | GIGYF2  | chr2  | + | 31    | NM_001103148 |
| D3A_WT | 2296 | 149959943 | 149960272 | 2.36 | GIMAP6  | chr7  | - | 506   | NM_024711    |
| D3A_WT | 976  | 24944638  | 24944796  | 2.38 | GIT1    | chr17 | - | -3981 | NM_014030    |
| D3A_WT | 2116 | 90654111  | 90654380  | 2.08 | GJA10   | chr6  | + | -6663 | NM_032602    |
| D3A_WT | 1004 | 40262982  | 40263116  | 2.72 | GJC1    | chr17 | - | 84    | NM_005497    |
| D3A_WT | 1004 | 40262982  | 40263116  | 2.72 | GJC1    | chr17 | - | 656   | NM_001080383 |
| D3A_WT | 2556 | 30581319  | 30581878  | 2.34 | GK      | chrX  | + | 202   | NM_000167    |
| D3A_WT | 474  | 133706946 | 133707085 | 2.07 | GLB1L2  | chr11 | + | 38    | NM_138342    |
| D3A_WT | 2208 | 7975079   | 7976099   | 2.44 | GLCCI1  | chr7  | + | 642   | NM_138426    |
| D3A_WT | 740  | 49421417  | 49421541  | 2.21 | GLDN    | chr15 | + | 475   | NM_181789    |
| D3A_WT | 528  | 56142497  | 56142748  | 2.08 | GLI1    | chr12 | + | 2422  | NM_001167609 |
| D3A_WT | 528  | 56142497  | 56142748  | 2.08 | GLI1    | chr12 | + | 2438  | NM_001160045 |
| D3A_WT | 2224 | 42242732  | 42242961  | 2.99 | GLI3    | chr7  | - | 297   | NM_000168    |
| D3A_WT | 550  | 108802682 | 108803233 | 2.55 | GLTP    | chr12 | - | -281  | NM_016433    |
| D3A_WT | 840  | 4837595   | 4838144   | 2.72 | GLYR1   | chr16 | - | -565  | NM_032569    |
| D3A_WT | 1304 | 44524767  | 44525318  | 2.4  | GMFG    | chr19 | - | -6476 | NM_004877    |
| D3A_WT | 2198 | 2856397   | 2856982   | 3.15 | GNA12   | chr7  | - | -6204 | NM_007353    |
| D3A_WT | 1031 | 60482750  | 60483698  | 3.2  | GNA13   | chr17 | - | 158   | NM_006572    |
| D3A_WT | 876  | 54782448  | 54783128  | 3.14 | GNAO1   | chr16 | + | 37    | NM_020988    |
| D3A_WT | 1578 | 56850171  | 56850730  | 3.62 | GNAS    | chr20 | + | 2261  | NM_016592    |
| D3A_WT | 1579 | 56899172  | 56899401  | 3.08 | GNAS    | chr20 | + | -533  | NM_001077489 |
| D3A_WT | 1579 | 56899172  | 56899401  | 3.08 | GNAS    | chr20 | + | 1712  | NR_003259    |
| D3A_WT | 1579 | 56899172  | 56899401  | 3.08 | GNAS    | chr20 | + | -877  | NM_001077488 |
| D3A_WT | 1579 | 56899172  | 56899401  | 3.08 | GNAS    | chr20 | + | -534  | NM_080426    |
| D3A_WT | 17   | 1811327   | 1812553   | 3.44 | GNB1    | chr1  | - | 415   | NM_002074    |
| D3A_WT | 811  | 1338668   | 1339687   | 4.1  | GNPTG   | chr16 | + | -2755 | NM_032520    |
| D3A_WT | 726  | 32663089  | 32663708  | 2.32 | GOLGA8B | chr15 | - | -335  | NR_027410    |
| D3A_WT | 191  | 215870797 | 215870946 | 2.05 | GPATCH2 | chr1  | - | 161   | NM_018040    |

|        |      |           |           |      |         |       |   |       |              |
|--------|------|-----------|-----------|------|---------|-------|---|-------|--------------|
| D3A_WT | 2595 | 132947621 | 132947760 | 2.88 | GPC3    | chrX  | - | -351  | NM_001164619 |
| D3A_WT | 587  | 26231588  | 26231942  | 3.4  | GPR12   | chr13 | - | 1157  | NM_005288    |
| D3A_WT | 266  | 95316614  | 95316893  | 2.55 | GPR120  | chr10 | + | 342   | NM_181745    |
| D3A_WT | 311  | 134751220 | 134751859 | 3.77 | GPR123  | chr10 | + | 141   | NM_001083909 |
| D3A_WT | 2178 | 1058258   | 1058392   | 2.2  | GPR146  | chr7  | + | -5341 | NM_138445    |
| D3A_WT | 236  | 25503797  | 25505377  | 3.63 | GPR158  | chr10 | + | 292   | NM_020752    |
| D3A_WT | 612  | 94052287  | 94052511  | 2.16 | GPR180  | chr13 | + | 295   | NM_180989    |
| D3A_WT | 1519 | 241217400 | 241220145 | 3.94 | GPR35   | chr2  | + | 1305  | NM_005301    |
| D3A_WT | 179  | 200358466 | 200359430 | 2.51 | GPR37L1 | chr1  | + | 297   | NM_004767    |
| D3A_WT | 401  | 60377277  | 60377526  | 2.04 | GPR44   | chr11 | - | 2619  | NM_004778    |
| D3A_WT | 671  | 90789629  | 90790073  | 2.53 | GPR68   | chr14 | - | 126   | NM_003485    |
| D3A_WT | 129  | 100777387 | 100777631 | 2.08 | GPR88   | chr1  | + | 1194  | NM_022049    |
| D3A_WT | 1739 | 45395556  | 45395975  | 3.22 | GRAMD4  | chr22 | + | -5556 | NM_015124    |
| D3A_WT | 1397 | 10003102  | 10003446  | 2.56 | GRHL1   | chr2  | + | -5968 | NM_198182    |
| D3A_WT | 95   | 37273130  | 37273389  | 3.11 | GRIK3   | chr1  | - | -828  | NM_000831    |
| D3A_WT | 1317 | 47264698  | 47265347  | 3.17 | GRIK5   | chr19 | - | -3225 | NM_002088    |
| D3A_WT | 2524 | 139152874 | 139153213 | 2.7  | GRIN1   | chr9  | + | -386  | NM_000832    |
| D3A_WT | 496  | 14025027  | 14025578  | 2.87 | GRIN2B  | chr12 | - | -1013 | NM_000834    |
| D3A_WT | 2460 | 103539818 | 103540057 | 2.03 | GRIN3A  | chr9  | - | 746   | NM_133445    |
| D3A_WT | 1153 | 954170    | 954814    | 3.39 | GRIN3B  | chr19 | + | 3056  | NM_138690    |
| D3A_WT | 1884 | 2937173   | 2937649   | 2.5  | GRK4    | chr4  | + | 2271  | NM_001004057 |
| D3A_WT | 2275 | 126681324 | 126682143 | 2.51 | GRM8    | chr7  | - | -2069 | NM_001127323 |
| D3A_WT | 2276 | 126686696 | 126687075 | 2.21 | GRM8    | chr7  | - | -7221 | NM_001127323 |
| D3A_WT | 938  | 3573777   | 3574113   | 2.88 | GSG2    | chr17 | + | 0     | NM_031965    |
| D3A_WT | 845  | 11916748  | 11917417  | 2.6  | GSPT1   | chr16 | - | 244   | NM_002094    |
| D3A_WT | 845  | 11916748  | 11917417  | 2.6  | GSPT1   | chr16 | - | 938   | NM_001130007 |
| D3A_WT | 666  | 76857490  | 76857634  | 2.31 | GSTZ1   | chr14 | + | 580   | NM_145871    |
| D3A_WT | 666  | 76857490  | 76857634  | 2.31 | GSTZ1   | chr14 | + | 104   | NM_001513    |
| D3A_WT | 588  | 27264814  | 27264958  | 2.16 | GSX1    | chr13 | + | 107   | NM_145657    |
| D3A_WT | 1737 | 45071619  | 45072388  | 3.47 | GTSE1   | chr22 | + | 702   | NM_016426    |
| D3A_WT | 106  | 42404608  | 42404732  | 2.27 | GUCA2A  | chr1  | - | -1688 | NM_033553    |
| D3A_WT | 452  | 106393913 | 106394447 | 2.55 | GUCY1A2 | chr11 | - | 201   | NM_000855    |
| D3A_WT | 1947 | 156900467 | 156900616 | 2.98 | GUCY1B3 | chr4  | + | 966   | NM_000857    |
| D3A_WT | 2240 | 65084538  | 65085077  | 3.16 | GUSB    | chr7  | - | -71   | NM_000181    |
| D3A_WT | 392  | 45901281  | 45901505  | 2.28 | GYLTL1B | chr11 | + | 1622  | NM_152312    |
| D3A_WT | 1141 | 492361    | 492875    | 2.96 | GZMM    | chr19 | + | -2408 | NM_005317    |
| D3A_WT | 1823 | 130522218 | 130523085 | 2.35 | H1FX    | chr3  | - | -4841 | NM_006026    |
| D3A_WT | 2588 | 103158387 | 103158719 | 2.42 | H2BFWT  | chrX  | - | -3641 | NM_001002916 |
| D3A_WT | 2587 | 103154018 | 103154196 | 2.48 | H2BFWT  | chrX  | - | 805   | NM_001002916 |
| D3A_WT | 1051 | 71286749  | 71286978  | 2.25 | H3F3B   | chr17 | - | 592   | NM_005324    |
| D3A_WT | 796  | 716441    | 716585    | 2.43 | HAGHL   | chr16 | + | -753  | NM_032304    |
| D3A_WT | 796  | 716441    | 716585    | 2.43 | HAGHL   | chr16 | + | -445  | NM_207112    |
| D3A_WT | 1272 | 19231572  | 19232936  | 2.63 | HAPLN4  | chr19 | - | 2342  | NM_023002    |
| D3A_WT | 1273 | 19234273  | 19234422  | 2.09 | HAPLN4  | chr19 | - | 249   | NM_023002    |
| D3A_WT | 1882 | 2213068   | 2214022   | 2.73 | HAUS3   | chr4  | - | 113   | NM_024511    |
| D3A_WT | 780  | 149624    | 149783    | 2.51 | HBM     | chr16 | + | -6269 | NM_001003938 |
| D3A_WT | 832  | 3018824   | 3019889   | 3.89 | HCFC1R1 | chr16 | - | -5068 | NM_001002017 |

|        |      |           |           |      |        |       |   |       |              |
|--------|------|-----------|-----------|------|--------|-------|---|-------|--------------|
| D3A_WT | 1145 | 541227    | 541576    | 2.8  | HCN2   | chr19 | + | 509   | NM_001194    |
| D3A_WT | 1764 | 13496736  | 13497085  | 3.37 | HDAC11 | chr3  | + | 67    | NM_001136041 |
| D3A_WT | 1764 | 13496736  | 13497085  | 3.37 | HDAC11 | chr3  | + | 196   | NM_024827    |
| D3A_WT | 509  | 46500070  | 46500324  | 2.62 | HDAC7  | chr12 | - | -167  | NM_001098416 |
| D3A_WT | 160  | 154987740 | 154988164 | 2.48 | HDGF   | chr1  | - | 912   | NM_001126050 |
| D3A_WT | 160  | 154987740 | 154988164 | 2.48 | HDGF   | chr1  | - | 696   | NM_001126051 |
| D3A_WT | 160  | 154987740 | 154988164 | 2.48 | HDGF   | chr1  | - | 215   | NM_004494    |
| D3A_WT | 1528 | 241860424 | 241860588 | 2.31 | HDLBP  | chr2  | - | 468   | NM_203346    |
| D3A_WT | 2174 | 733096    | 733420    | 2.78 | HEATR2 | chr7  | + | 395   | NM_017802    |
| D3A_WT | 2143 | 138766948 | 138767303 | 2.2  | HEBP2  | chr6  | + | 97    | NM_014320    |
| D3A_WT | 743  | 61917959  | 61918116  | 2.4  | HERC1  | chr15 | - | -4837 | NM_003922    |
| D3A_WT | 45   | 6401366   | 6401820   | 2.95 | HES2   | chr1  | - | 973   | NM_019089    |
| D3A_WT | 46   | 6407273   | 6407619   | 2.87 | HES2   | chr1  | - | -4880 | NM_019089    |
| D3A_WT | 29   | 2458234   | 2458559   | 2.65 | HES5   | chr1  | - | -6852 | NM_001010926 |
| D3A_WT | 28   | 2450216   | 2451160   | 3.2  | HES5   | chr1  | - | 856   | NM_001010926 |
| D3A_WT | 1515 | 238814355 | 238814829 | 2.44 | HES6   | chr2  | - | -1172 | NM_018645    |
| D3A_WT | 1514 | 238812886 | 238813300 | 2.48 | HES6   | chr2  | - | 327   | NM_018645    |
| D3A_WT | 1091 | 77969561  | 77969910  | 2.62 | HEXDC  | chr17 | + | 195   | NM_173620    |
| D3A_WT | 265  | 94441924  | 94442372  | 2.58 | HHEX   | chr10 | + | 2488  | NM_002729    |
| D3A_WT | 128  | 100276794 | 100276938 | 2.21 | HIAT1  | chr1  | + | 490   | NM_033055    |
| D3A_WT | 934  | 1900012   | 1901172   | 2.91 | HIC1   | chr17 | + | -5761 | NM_001098202 |
| D3A_WT | 934  | 1900012   | 1901172   | 2.91 | HIC1   | chr17 | + | -4550 | NM_006497    |
| D3A_WT | 1677 | 20100980  | 20101852  | 2.26 | HIC2   | chr22 | + | -276  | NM_015094    |
| D3A_WT | 2018 | 130528552 | 130528701 | 2.31 | HINT1  | chr5  | - | 307   | NM_005340    |
| D3A_WT | 2018 | 130528552 | 130528701 | 2.31 | HINT1  | chr5  | - | 299   | NR_024611    |
| D3A_WT | 562  | 121885802 | 121886845 | 4    | HIP1R  | chr12 | + | 332   | NM_003959    |
| D3A_WT | 1309 | 45588269  | 45588607  | 3.12 | HIPK4  | chr19 | - | -504  | NM_144685    |
| D3A_WT | 246  | 70748709  | 70749238  | 2.6  | HK1    | chr10 | + | 3358  | NM_033496    |
| D3A_WT | 246  | 70748709  | 70749238  | 2.6  | HK1    | chr10 | + | 365   | NM_000188    |
| D3A_WT | 194  | 219119485 | 219120254 | 2.98 | HLX    | chr1  | + | 504   | NM_021958    |
| D3A_WT | 1950 | 174491663 | 174491912 | 2.13 | HMGB2  | chr4  | - | 383   | NM_002129    |
| D3A_WT | 1950 | 174491663 | 174491912 | 2.13 | HMGB2  | chr4  | - | 297   | NM_001130688 |
| D3A_WT | 1950 | 174491663 | 174491912 | 2.13 | HMGB2  | chr4  | - | -292  | NM_001130689 |
| D3A_WT | 1702 | 34107018  | 34107147  | 2.72 | HMOX1  | chr22 | + | -4    | NM_002133    |
| D3A_WT | 839  | 4466252   | 4467016   | 2.32 | HMOX2  | chr16 | + | 1915  | NM_001127206 |
| D3A_WT | 839  | 4466252   | 4467016   | 2.32 | HMOX2  | chr16 | + | 293   | NM_002134    |
| D3A_WT | 296  | 124898039 | 124898303 | 2.95 | HMX2   | chr10 | + | 544   | NM_005519    |
| D3A_WT | 1564 | 42418534  | 42419060  | 3    | HNF4A  | chr20 | + | 943   | NM_175914    |
| D3A_WT | 216  | 243093351 | 243093565 | 3.12 | HNRNPU | chr1  | - | 992   | NM_031844    |
| D3A_WT | 2339 | 42871290  | 42872440  | 3.63 | HOOK3  | chr8  | + | 676   | NM_032410    |
| D3A_WT | 1009 | 43963505  | 43963723  | 2.5  | HOXB1  | chr17 | - | -343  | NM_002144    |
| D3A_WT | 1010 | 44053816  | 44054065  | 2.71 | HOXB8  | chr17 | - | -6640 | NM_024016    |
| D3A_WT | 1011 | 44058989  | 44059563  | 3.11 | HOXB9  | chr17 | - | -442  | NM_024017    |
| D3A_WT | 522  | 52631607  | 52631756  | 2.43 | HOXC12 | chr12 | + | -3299 | NM_173860    |
| D3A_WT | 523  | 52685248  | 52685517  | 2.26 | HOXC8  | chr12 | + | -3774 | NM_022658    |
| D3A_WT | 1482 | 176725109 | 176725354 | 3.09 | HOXD4  | chr2  | + | 873   | NM_014621    |
| D3A_WT | 2330 | 22044094  | 22044228  | 2.16 | HR     | chr8  | - | 349   | NM_018411    |

|        |      |           |           |      |          |       |   |       |              |
|--------|------|-----------|-----------|------|----------|-------|---|-------|--------------|
| D3A_WT | 324  | 525648    | 526092    | 3.09 | HRAS     | chr11 | - | -320  | NM_001130442 |
| D3A_WT | 323  | 521954    | 523893    | 3.31 | HRAS     | chr11 | - | 2627  | NM_001130442 |
| D3A_WT | 1582 | 60233613  | 60233862  | 3.32 | HRH3     | chr20 | - | -5019 | NM_007232    |
| D3A_WT | 815  | 1909542   | 1910081   | 2.33 | HS3ST6   | chr16 | - | -1579 | NM_001009606 |
| D3A_WT | 614  | 95541526  | 95541665  | 2.74 | HS6ST3   | chr13 | + | 502   | NM_153456    |
| D3A_WT | 995  | 37960226  | 37960365  | 2.17 | HSD17B1  | chr17 | + | 2786  | NM_000413    |
| D3A_WT | 899  | 80620371  | 80620525  | 2.41 | HSD17B2  | chr16 | + | -5910 | NM_002153    |
| D3A_WT | 293  | 118491602 | 118491849 | 2.72 | HSPA12A  | chr10 | - | 350   | NM_025015    |
| D3A_WT | 1292 | 40938496  | 40938840  | 2.53 | HSPB6    | chr19 | - | 1102  | NM_144617    |
| D3A_WT | 557  | 118101212 | 118101434 | 2.6  | HSPB8    | chr12 | + | 346   | NM_014365    |
| D3A_WT | 1817 | 123996952 | 123997601 | 2.58 | HSPBAP1  | chr3  | - | -1936 | NM_024610    |
| D3A_WT | 2144 | 144371050 | 144371304 | 2.45 | HYMAI    | chr6  | - | 383   | NR_002768    |
| D3A_WT | 1396 | 9532331   | 9532470   | 2.86 | IAH1     | chr2  | + | 280   | NM_001039613 |
| D3A_WT | 1395 | 8740698   | 8741137   | 2.71 | ID2      | chr2  | + | 1354  | NM_002166    |
| D3A_WT | 1249 | 13125321  | 13125445  | 2.9  | IER2     | chr19 | + | 3102  | NM_004907    |
| D3A_WT | 2085 | 30820385  | 30820509  | 2.39 | IER3     | chr6  | - | -141  | NM_003897    |
| D3A_WT | 2488 | 130980618 | 130980782 | 2.22 | IER5L    | chr9  | - | -339  | NM_203434    |
| D3A_WT | 2487 | 130978841 | 130979672 | 2.4  | IER5L    | chr9  | - | 1105  | NM_203434    |
| D3A_WT | 484  | 6534671   | 6535690   | 4.41 | IFFO1    | chr12 | - | -6645 | NM_080731    |
| D3A_WT | 484  | 6534671   | 6535690   | 4.41 | IFFO1    | chr12 | - | 310   | NM_080730    |
| D3A_WT | 1622 | 33697557  | 33697821  | 2.4  | IFNGR2   | chr21 | + | 618   | NM_005534    |
| D3A_WT | 813  | 1604230   | 1605271   | 2.3  | IFT140   | chr16 | - | -2640 | NM_014714    |
| D3A_WT | 1813 | 109428060 | 109428433 | 2.8  | IFT57    | chr3  | - | -4139 | NM_018010    |
| D3A_WT | 774  | 97008421  | 97009743  | 3.09 | IGF1R    | chr15 | + | -1201 | NM_000875    |
| D3A_WT | 775  | 97011310  | 97011941  | 2.66 | IGF1R    | chr15 | + | 1342  | NM_000875    |
| D3A_WT | 2231 | 45927144  | 45927607  | 2.32 | IGFBP3   | chr7  | - | 21    | NM_001013398 |
| D3A_WT | 1489 | 217265096 | 217265340 | 2.37 | IGFBP5   | chr2  | - | 3299  | NM_000599    |
| D3A_WT | 164  | 158334760 | 158335006 | 3.13 | IGSF8    | chr1  | - | 149   | NM_052868    |
| D3A_WT | 2338 | 42247594  | 42248258  | 2.34 | IKBKB    | chr8  | + | -59   | NM_001556    |
| D3A_WT | 582  | 20175316  | 20175730  | 2.75 | IL17D    | chr13 | + | 42    | NM_138284    |
| D3A_WT | 1802 | 53855532  | 53855996  | 2.71 | IL17RB   | chr3  | + | 148   | NM_018725    |
| D3A_WT | 76   | 24387457  | 24387592  | 2.19 | IL28RA   | chr1  | - | -1186 | NM_173064    |
| D3A_WT | 2021 | 131904246 | 131904565 | 2.74 | IL5      | chr5  | - | 2708  | NM_000879    |
| D3A_WT | 1513 | 238776563 | 238777247 | 2.25 | ILKAP    | chr2  | - | 158   | NM_030768    |
| D3A_WT | 1110 | 20255739  | 20256070  | 2.69 | IMPACT   | chr18 | + | -4702 | NM_018439    |
| D3A_WT | 2344 | 58068436  | 58068815  | 2.75 | IMPAD1   | chr8  | - | 356   | NM_017813    |
| D3A_WT | 280  | 105026536 | 105027570 | 2.62 | INA      | chr10 | + | 144   | NM_032727    |
| D3A_WT | 700  | 104223316 | 104223755 | 3.74 | INF2     | chr14 | + | -3467 | NM_032714    |
| D3A_WT | 700  | 104223316 | 104223755 | 3.74 | INF2     | chr14 | + | -3452 | NM_001031714 |
| D3A_WT | 1495 | 220143571 | 220144025 | 2.65 | INHHA    | chr2  | + | -1399 | NM_002191    |
| D3A_WT | 436  | 71613720  | 71614061  | 2.46 | INPPL1   | chr11 | + | 361   | NM_001567    |
| D3A_WT | 353  | 2141894   | 2142358   | 3.31 | INS      | chr11 | - | -3111 | NM_000207    |
| D3A_WT | 353  | 2141894   | 2142358   | 3.31 | INS-IGF2 | chr11 | - | -3111 | NM_001042376 |
| D3A_WT | 156  | 151966612 | 151967248 | 2.99 | INTS3    | chr1  | + | -260  | NM_023015    |
| D3A_WT | 848  | 19630091  | 19630220  | 2.21 | IQCK     | chr16 | + | -5123 | NM_153208    |
| D3A_WT | 2280 | 128366164 | 128366484 | 2.41 | IRF5     | chr7  | + | 1095  | NM_001098630 |
| D3A_WT | 2280 | 128366164 | 128366484 | 2.41 | IRF5     | chr7  | + | 818   | NM_032643    |

|        |      |           |           |      |          |       |   |       |              |
|--------|------|-----------|-----------|------|----------|-------|---|-------|--------------|
| D3A_WT | 2280 | 128366164 | 128366484 | 2.41 | IRF5     | chr7  | + | -1683 | NM_001098627 |
| D3A_WT | 907  | 84489878  | 84490332  | 2.33 | IRF8     | chr16 | + | -169  | NM_002163    |
| D3A_WT | 1319 | 48914477  | 48915236  | 4.18 | IRGC     | chr19 | + | 2803  | NM_019612    |
| D3A_WT | 618  | 109234650 | 109237064 | 3.19 | IRS2     | chr13 | - | 1058  | NM_003749    |
| D3A_WT | 2591 | 107865014 | 107866558 | 3.82 | IRS4     | chrX  | - | 477   | NM_003604    |
| D3A_WT | 547  | 107482098 | 107482251 | 2    | ISCU     | chr12 | + | 1751  | NM_213595    |
| D3A_WT | 1268 | 18406456  | 18407480  | 2.91 | ISYNA1   | chr19 | - | 2975  | NM_016368    |
| D3A_WT | 1269 | 18408256  | 18408475  | 3.05 | ISYNA1   | chr19 | - | 1578  | NM_016368    |
| D3A_WT | 1769 | 37468842  | 37469266  | 2.9  | ITGA9    | chr3  | + | 238   | NM_002207    |
| D3A_WT | 1642 | 45177006  | 45177355  | 2.53 | ITGB2    | chr21 | - | -3999 | NM_001127491 |
| D3A_WT | 731  | 39575175  | 39575814  | 2.52 | ITPKA    | chr15 | + | 2081  | NM_002220    |
| D3A_WT | 1312 | 45914651  | 45915296  | 4.23 | ITPKC    | chr19 | + | 126   | NM_025194    |
| D3A_WT | 286  | 106088211 | 106088542 | 2.43 | ITPRIP   | chr10 | - | -4723 | NM_033397    |
| D3A_WT | 178  | 183557683 | 183558128 | 2.44 | IVNS1ABP | chr1  | - | -4821 | NM_006469    |
| D3A_WT | 2216 | 28186258  | 28187416  | 3.08 | JAZF1    | chr7  | - | 125   | NM_175061    |
| D3A_WT | 1349 | 55712758  | 55713407  | 4.13 | JOSD2    | chr19 | - | -6925 | NM_138334    |
| D3A_WT | 1348 | 55707787  | 55707936  | 2.01 | JOSD2    | chr19 | - | -1704 | NM_138334    |
| D3A_WT | 2351 | 75395244  | 75395879  | 3.35 | JPH1     | chr8  | - | 556   | NM_020647    |
| D3A_WT | 640  | 23114758  | 23115287  | 3.63 | JPH4     | chr14 | - | 2827  | NM_001146028 |
| D3A_WT | 639  | 22520500  | 22520954  | 2.33 | JUB      | chr14 | - | -4455 | NM_198086    |
| D3A_WT | 639  | 22520500  | 22520954  | 2.33 | JUB      | chr14 | - | 961   | NM_032876    |
| D3A_WT | 2079 | 24468044  | 24468188  | 2.23 | KAAG1    | chr6  | + | 3007  | NM_181337    |
| D3A_WT | 1337 | 54267289  | 54267628  | 3.2  | KCNA7    | chr19 | - | 552   | NM_031886    |
| D3A_WT | 951  | 7775287   | 7776027   | 2.5  | KCNAB3   | chr17 | - | -2179 | NM_004732    |
| D3A_WT | 2350 | 73611614  | 73612128  | 2.65 | KCNB2    | chr8  | + | -308  | NM_004770    |
| D3A_WT | 379  | 17713102  | 17713546  | 2.55 | KCNC1    | chr11 | + | -746  | NM_001112741 |
| D3A_WT | 380  | 17714627  | 17715747  | 2.66 | KCNC1    | chr11 | + | 1117  | NM_001112741 |
| D3A_WT | 2567 | 48711011  | 48711270  | 2.61 | KCND1    | chrX  | - | 2055  | NM_004979    |
| D3A_WT | 1569 | 49072758  | 49073197  | 2.69 | KCNG1    | chr20 | - | 105   | NM_002237    |
| D3A_WT | 1135 | 75722559  | 75723019  | 2.39 | KCNG2    | chr18 | + | -1866 | NM_012283    |
| D3A_WT | 657  | 62582243  | 62583082  | 2.42 | KCNH5    | chr14 | - | -954  | NM_139318    |
| D3A_WT | 1901 | 20914955  | 20915209  | 2.31 | KCNIP4   | chr4  | - | -455  | NM_147183    |
| D3A_WT | 469  | 128223990 | 128224131 | 2.16 | KCNJ1    | chr11 | - | -6487 | NM_000220    |
| D3A_WT | 470  | 128265727 | 128266386 | 2.88 | KCNJ5    | chr11 | + | -466  | NM_000890    |
| D3A_WT | 257  | 79067024  | 79067948  | 2.61 | KCNMA1   | chr10 | - | 97    | NM_001014797 |
| D3A_WT | 1266 | 17919735  | 17920194  | 2.69 | KCNN1    | chr19 | + | -3146 | NM_002248    |
| D3A_WT | 2012 | 113726146 | 113727186 | 2.95 | KCNN2    | chr5  | + | 752   | NM_021614    |
| D3A_WT | 1320 | 48976586  | 48976730  | 2.76 | KCNN4    | chr19 | - | 591   | NM_002250    |
| D3A_WT | 1321 | 48977981  | 48978445  | 2.46 | KCNN4    | chr19 | - | -964  | NM_002250    |
| D3A_WT | 1594 | 61574070  | 61574209  | 2.31 | KCNQ2    | chr20 | - | 298   | NM_004518    |
| D3A_WT | 607  | 76357305  | 76358355  | 3.99 | KCTD12   | chr13 | - | 711   | NM_138444    |
| D3A_WT | 2242 | 65731382  | 65731616  | 2.27 | KCTD7    | chr7  | + | 197   | NM_001167961 |
| D3A_WT | 454  | 107874154 | 107874506 | 2.68 | KDELC2   | chr11 | - | 39    | NM_153705    |
| D3A_WT | 560  | 120501670 | 120501899 | 2.95 | KDM2B    | chr12 | - | 1519  | NM_032590    |
| D3A_WT | 560  | 120501670 | 120501899 | 2.95 | KDM2B    | chr12 | - | 963   | NM_001005366 |
| D3A_WT | 950  | 7677692   | 7678316   | 2.71 | KDM6B    | chr17 | + | -5955 | NM_001080424 |
| D3A_WT | 1235 | 10474258  | 10475020  | 2.79 | KEAP1    | chr19 | - | 415   | NM_203500    |

|        |      |           |           |      |           |       |   |       |              |
|--------|------|-----------|-----------|------|-----------|-------|---|-------|--------------|
| D3A_WT | 1235 | 10474258  | 10475020  | 2.79 | KEAP1     | chr19 | - | -158  | NM_012289    |
| D3A_WT | 2371 | 136538985 | 136539433 | 2.37 | KHDRBS3   | chr8  | + | 312   | NM_006558    |
| D3A_WT | 91   | 35795560  | 35796607  | 2.52 | KIAA0319L | chr1  | - | -459  | NM_024874    |
| D3A_WT | 2200 | 4781521   | 4781970   | 2.53 | KIAA0415  | chr7  | + | -44   | NM_014855    |
| D3A_WT | 902  | 83618629  | 83618783  | 2.21 | KIAA0513  | chr16 | + | -204  | NM_014732    |
| D3A_WT | 1103 | 8707890   | 8708026   | 2.39 | KIAA0802  | chr18 | + | 590   | NM_015210    |
| D3A_WT | 1986 | 5476235   | 5476584   | 2.96 | KIAA0947  | chr5  | + | 603   | NM_015325    |
| D3A_WT | 758  | 77511688  | 77512507  | 3.15 | KIAA1024  | chr15 | + | 185   | NM_015206    |
| D3A_WT | 2288 | 141048333 | 141048682 | 2.43 | KIAA1147  | chr7  | - | -85   | NM_001080392 |
| D3A_WT | 1441 | 96667644  | 96668123  | 3.55 | KIAA1310  | chr2  | - | -41   | NM_001115016 |
| D3A_WT | 450  | 101290878 | 101291012 | 2.76 | KIAA1377  | chr11 | + | -10   | NM_020802    |
| D3A_WT | 676  | 92868370  | 92868990  | 2.38 | KIAA1409  | chr14 | + | -637  | NM_020818    |
| D3A_WT | 1955 | 186361897 | 186362550 | 3.33 | KIAA1430  | chr4  | - | -47   | NM_020827    |
| D3A_WT | 495  | 13089098  | 13089242  | 2.79 | KIAA1467  | chr12 | + | 589   | NM_020853    |
| D3A_WT | 89   | 32980215  | 32980465  | 2.18 | KIAA1522  | chr1  | + | 242   | NM_020888    |
| D3A_WT | 1871 | 1330773   | 1331208   | 2.5  | KIAA1530  | chr4  | + | -113  | NM_020894    |
| D3A_WT | 2283 | 138316882 | 138317507 | 3.6  | KIAA1549  | chr7  | - | -590  | NM_020910    |
| D3A_WT | 900  | 83102410  | 83102669  | 2.29 | KIAA1609  | chr16 | - | -6750 | NM_020947    |
| D3A_WT | 209  | 231530065 | 231530794 | 2.03 | KIAA1804  | chr1  | + | 293   | NM_032435    |
| D3A_WT | 2399 | 145237592 | 145238931 | 2.98 | KIAA1875  | chr8  | + | 3645  | NR_024207    |
| D3A_WT | 2398 | 145235287 | 145235736 | 2.21 | KIAA1875  | chr8  | + | 895   | NR_024207    |
| D3A_WT | 2192 | 1575936   | 1576597   | 2.95 | KIAA1908  | chr7  | + | 32    | NR_027328    |
| D3A_WT | 1816 | 114897998 | 114898469 | 3.14 | KIAA2018  | chr3  | - | -50   | NM_001009899 |
| D3A_WT | 1524 | 241408398 | 241408750 | 2.19 | KIF1A     | chr2  | - | -277  | NM_004321    |
| D3A_WT | 505  | 38122773  | 38123027  | 3.25 | KIF21A    | chr12 | - | 285   | NM_017641    |
| D3A_WT | 696  | 103674137 | 103674989 | 2.84 | KIF26A    | chr14 | + | -249  | NM_015656    |
| D3A_WT | 1022 | 49255779  | 49256843  | 2.93 | KIF2B     | chr17 | + | 1074  | NM_032559    |
| D3A_WT | 1782 | 47299349  | 47299528  | 2.26 | KIF9      | chr3  | - | -97   | NM_022342    |
| D3A_WT | 501  | 27824373  | 27824502  | 2.36 | KLHDC5    | chr12 | + | -16   | NM_020782    |
| D3A_WT | 1111 | 28613123  | 28613291  | 2.07 | KLHL14    | chr18 | - | -6235 | NM_020805    |
| D3A_WT | 2552 | 23953029  | 23953379  | 2.12 | KLHL15    | chrX  | - | 2020  | NM_030624    |
| D3A_WT | 1782 | 47299349  | 47299528  | 2.26 | KLHL18    | chr3  | + | 105   | NM_025010    |
| D3A_WT | 1673 | 19179937  | 19180387  | 3.72 | KLHL22    | chr22 | - | -40   | NM_032775    |
| D3A_WT | 1351 | 56277439  | 56277568  | 2.3  | KLK14     | chr19 | - | 1811  | NM_022046    |
| D3A_WT | 1837 | 161765446 | 161765865 | 3.22 | KPNA4     | chr3  | - | 415   | NM_002268    |
| D3A_WT | 1008 | 43082104  | 43082557  | 2.37 | KPNB1     | chr17 | + | 57    | NM_002265    |
| D3A_WT | 499  | 25294721  | 25295548  | 3.12 | KRAS      | chr12 | - | -13   | NM_004985    |
| D3A_WT | 1236 | 10541043  | 10541192  | 2.08 | KRI1      | chr19 | - | -3415 | NM_023008    |
| D3A_WT | 518  | 51382523  | 51383397  | 2.62 | KRT77     | chr12 | - | 554   | NM_175078    |
| D3A_WT | 1640 | 44824638  | 44824912  | 2.29 | KRTAP10-5 | chr21 | - | 134   | NM_198694    |
| D3A_WT | 1563 | 41569941  | 41570169  | 2.8  | L3MBTL    | chr20 | + | -6411 | NM_015478    |
| D3A_WT | 1101 | 6404616   | 6405075   | 2.59 | L3MBTL4   | chr18 | - | 65    | NM_173464    |
| D3A_WT | 525  | 53314758  | 53315387  | 2.4  | LACRT     | chr12 | - | -142  | NM_033277    |
| D3A_WT | 1102 | 7106942   | 7107196   | 2.22 | LAMA1     | chr18 | - | 744   | NM_005559    |
| D3A_WT | 176  | 181259608 | 181260164 | 3.23 | LAMC1     | chr1  | + | 669   | NM_002293    |
| D3A_WT | 1701 | 32645865  | 32646009  | 2.88 | LARGE     | chr22 | - | 479   | NM_133642    |
| D3A_WT | 1933 | 129202274 | 129202918 | 2.89 | LARP1B    | chr4  | + | 644   | NM_018078    |



|        |      |           |           |      |              |       |   |       |              |
|--------|------|-----------|-----------|------|--------------|-------|---|-------|--------------|
| D3A_WT | 2575 | 64671371  | 64671839  | 2.63 | LAS1L        | chrX  | - | -213  | NM_031206    |
| D3A_WT | 147  | 149213597 | 149213733 | 2.11 | LASS2        | chr1  | - | 399   | NM_181746    |
| D3A_WT | 513  | 48847169  | 48847550  | 2.05 | LASS5        | chr12 | - | 5     | NM_147190    |
| D3A_WT | 197  | 223682682 | 223682841 | 2.38 | LBR          | chr1  | - | 381   | NM_194442    |
| D3A_WT | 197  | 223682682 | 223682841 | 2.38 | LBR          | chr1  | - | -354  | NM_002296    |
| D3A_WT | 747  | 65907226  | 65907370  | 2.49 | LBXCOR1      | chr15 | + | 2304  | NM_001031807 |
| D3A_WT | 87   | 32510846  | 32511295  | 3.37 | LCK          | chr1  | + | -1228 | NM_001042771 |
| D3A_WT | 2511 | 137549514 | 137549963 | 2.94 | LCN1         | chr9  | + | -3368 | NM_002297    |
| D3A_WT | 892  | 73705746  | 73705885  | 2.32 | LDHD         | chr16 | - | 2351  | NM_194436    |
| D3A_WT | 1930 | 109308381 | 109309456 | 3.15 | LEF1         | chr4  | - | 643   | NM_001130714 |
| D3A_WT | 1930 | 109308381 | 109309456 | 3.15 | LEF1         | chr4  | - | -1516 | NM_001166119 |
| D3A_WT | 2089 | 33864401  | 33864755  | 2.91 | LEMD2        | chr6  | - | -1881 | NM_001143944 |
| D3A_WT | 2089 | 33864401  | 33864755  | 2.91 | LEMD2        | chr6  | - | 306   | NM_181336    |
| D3A_WT | 1361 | 59652220  | 59652944  | 3.2  | LENG8        | chr19 | + | 706   | NM_052925    |
| D3A_WT | 1362 | 59668398  | 59668542  | 2.25 | LENG9        | chr19 | - | -1764 | NM_198988    |
| D3A_WT | 2337 | 38358825  | 38359587  | 2.18 | LETM2        | chr8  | + | -3970 | NM_144652    |
| D3A_WT | 1300 | 43998217  | 43998861  | 2.32 | LGALS4       | chr19 | - | -2959 | NM_006149    |
| D3A_WT | 1290 | 40314827  | 40315751  | 4.57 | LGI4         | chr19 | - | 2729  | NM_139284    |
| D3A_WT | 1291 | 40324498  | 40324667  | 2.58 | LGI4         | chr19 | - | -6564 | NM_139284    |
| D3A_WT | 2470 | 124030603 | 124031355 | 2.35 | LHX6         | chr9  | - | -139  | NM_199160    |
| D3A_WT | 1693 | 28972447  | 28972601  | 2.62 | LIF          | chr22 | - | 272   | NM_002309    |
| D3A_WT | 1993 | 38592180  | 38593243  | 2.94 | LIFR         | chr5  | - | -206  | NM_001127671 |
| D3A_WT | 1603 | 61834153  | 61834408  | 3.47 | LIME1        | chr20 | + | -4141 | NM_017806    |
| D3A_WT | 2303 | 156377963 | 156378113 | 2.82 | LMBR1        | chr7  | - | 625   | NM_022458    |
| D3A_WT | 2256 | 97574145  | 97574314  | 2.51 | LMTK2        | chr7  | + | 97    | NM_014916    |
| D3A_WT | 1335 | 53706373  | 53706887  | 2.62 | LMTK3        | chr19 | - | 1628  | NM_001080434 |
| D3A_WT | 2477 | 128416172 | 128416341 | 3    | LMX1B        | chr9  | + | -312  | NM_002316    |
| D3A_WT | 2009 | 96297354  | 96297603  | 2.79 | LNPEP        | chr5  | + | 377   | NM_005575    |
| D3A_WT | 1838 | 171167492 | 171167756 | 2.94 | LOC100128164 | chr3  | - | -408  | NR_027622    |
| D3A_WT | 1224 | 7448314   | 7450789   | 4.17 | LOC100128573 | chr19 | - | -5304 | NR_024491    |
| D3A_WT | 826  | 2746196   | 2746655   | 2.6  | LOC100128788 | chr16 | - | -3823 | NR_027275    |
| D3A_WT | 825  | 2731428   | 2731757   | 2.34 | LOC100128788 | chr16 | - | 3207  | NR_027274    |
| D3A_WT | 236  | 25503797  | 25505377  | 3.63 | LOC100128811 | chr10 | - | 624   | NR_027333    |
| D3A_WT | 1780 | 47025513  | 47026641  | 2.14 | LOC100129354 | chr3  | + | -1958 | NR_024046    |
| D3A_WT | 1416 | 43307372  | 43307819  | 2.48 | LOC100129726 | chr2  | + | -258  | NR_027251    |
| D3A_WT | 575  | 131356384 | 131356633 | 2.32 | LOC100130238 | chr12 | + | -5541 | NR_024563    |
| D3A_WT | 1869 | 1190920   | 1191071   | 2.43 | LOC100130872 | chr4  | - | 1755  | NR_024569    |
| D3A_WT | 151  | 150077298 | 150077737 | 2.87 | LOC100132111 | chr1  | + | -51   | NR_024237    |
| D3A_WT | 713  | 106007530 | 106007679 | 2.17 | LOC100133469 | chr14 | + | -1895 | NR_027457    |
| D3A_WT | 785  | 363906    | 365160    | 2.62 | LOC100134368 | chr16 | + | -7708 | NR_024453    |
| D3A_WT | 786  | 365901    | 368667    | 3.2  | LOC100134368 | chr16 | + | -4957 | NR_024453    |
| D3A_WT | 1754 | 49363271  | 49363720  | 2.55 | LOC100144603 | chr22 | + | -4825 | NR_021492    |
| D3A_WT | 806  | 1071702   | 1072132   | 2.88 | LOC146336    | chr16 | - | -3185 | NR_027242    |
| D3A_WT | 1663 | 17934365  | 17934514  | 2.08 | LOC150185    | chr22 | - | -77   | NR_024381    |
| D3A_WT | 1669 | 18567135  | 18567389  | 2.57 | LOC150197    | chr22 | + | -6592 | NR_026919    |
| D3A_WT | 2301 | 154425725 | 154426758 | 3.32 | LOC202781    | chr7  | + | 166   | NR_028090    |
| D3A_WT | 334  | 1287386   | 1287735   | 2.74 | LOC255512    | chr11 | + | 47    | NR_029409    |

|        |      |           |           |      |           |       |   |       |              |
|--------|------|-----------|-----------|------|-----------|-------|---|-------|--------------|
| D3A_WT | 1966 | 531586    | 532049    | 3.12 | LOC25845  | chr5  | - | -5737 | NR_024158    |
| D3A_WT | 2513 | 138348222 | 138349655 | 3.14 | LOC26102  | chr9  | - | -7338 | NR_026964    |
| D3A_WT | 258  | 80497312  | 80498960  | 2.33 | LOC283050 | chr10 | - | -925  | NR_024429    |
| D3A_WT | 876  | 54782448  | 54783128  | 3.14 | LOC283856 | chr16 | - | -281  | NR_027078    |
| D3A_WT | 340  | 1549665   | 1550512   | 2.2  | LOC338651 | chr11 | + | -458  | NR_021489    |
| D3A_WT | 536  | 88627172  | 88627936  | 2.14 | LOC338758 | chr12 | + | 692   | NR_028138    |
| D3A_WT | 1402 | 24197385  | 24197704  | 2.68 | LOC375190 | chr2  | + | -2309 | NM_001145710 |
| D3A_WT | 1403 | 24199570  | 24199939  | 3.47 | LOC375190 | chr2  | + | -99   | NM_001145710 |
| D3A_WT | 386  | 43920704  | 43922267  | 2.9  | LOC387763 | chr11 | + | 804   | NM_001145033 |
| D3A_WT | 1068 | 76746228  | 76747682  | 3.13 | LOC388428 | chr17 | + | -6946 | NR_027255    |
| D3A_WT | 38   | 3679125   | 3679479   | 2.26 | LOC388588 | chr1  | + | 91    | NM_001163724 |
| D3A_WT | 2026 | 138758011 | 138758840 | 2.44 | LOC389333 | chr5  | - | 359   | NM_001161546 |
| D3A_WT | 2233 | 56151146  | 56151565  | 2.32 | LOC389493 | chr7  | - | 229   | NM_001145712 |
| D3A_WT | 744  | 63156393  | 63156937  | 2.35 | LOC390594 | chr15 | + | 459   | NM_001101362 |
| D3A_WT | 2348 | 65655193  | 65656116  | 2.23 | LOC401463 | chr8  | - | -3280 | NR_015374    |
| D3A_WT | 1037 | 63708604  | 63709028  | 2.49 | LOC440461 | chr17 | + | 2421  | NR_027283    |
| D3A_WT | 1451 | 110062401 | 110063295 | 3.67 | LOC440895 | chr2  | + | 293   | NR_027143    |
| D3A_WT | 1798 | 52544911  | 52546108  | 2.73 | LOC440957 | chr3  | + | -151  | NM_001124767 |
| D3A_WT | 400  | 50213819  | 50214489  | 2.89 | LOC441601 | chr11 | - | 45    | NR_003034    |
| D3A_WT | 1930 | 109308381 | 109309456 | 3.15 | LOC641518 | chr4  | + | -3806 | NR_029373    |
| D3A_WT | 1930 | 109308381 | 109309456 | 3.15 | LOC641518 | chr4  | + | 789   | NR_029374    |
| D3A_WT | 1050 | 71139822  | 71140041  | 2.63 | LOC643008 | chr17 | + | -1177 | NM_001162995 |
| D3A_WT | 1050 | 71139822  | 71140041  | 2.63 | LOC643008 | chr17 | + | -4338 | NR_028439    |
| D3A_WT | 453  | 106968787 | 106968968 | 2.28 | LOC643923 | chr11 | + | 1197  | NR_028328    |
| D3A_WT | 1848 | 192063569 | 192063713 | 2.04 | LOC647309 | chr3  | - | -482  | NM_001146686 |
| D3A_WT | 155  | 151500128 | 151501367 | 2.56 | LOR       | chr1  | + | 1945  | NM_000427    |
| D3A_WT | 1277 | 19600163  | 19600822  | 2.93 | LPAR2     | chr19 | - | -453  | NM_004720    |
| D3A_WT | 1278 | 19601748  | 19602112  | 2.33 | LPAR2     | chr19 | - | -1891 | NM_004720    |
| D3A_WT | 489  | 6996169   | 6996418   | 2.4  | LPCAT3    | chr12 | - | -190  | NM_005768    |
| D3A_WT | 598  | 46025626  | 46025855  | 2.27 | LRCH1     | chr13 | + | 444   | NM_001164213 |
| D3A_WT | 1303 | 44502865  | 44503284  | 2.24 | LRFN1     | chr19 | - | -5258 | NM_020862    |
| D3A_WT | 1293 | 41122168  | 41123127  | 3.13 | LRFN3     | chr19 | + | 2786  | NM_024509    |
| D3A_WT | 529  | 57599728  | 57600764  | 3.12 | LRIG3     | chr12 | - | -652  | NM_001136051 |
| D3A_WT | 529  | 57599728  | 57600764  | 3.12 | LRIG3     | chr12 | - | 283   | NM_153377    |
| D3A_WT | 2363 | 105670838 | 105671077 | 2.32 | LRP12     | chr8  | - | -561  | NM_001135703 |
| D3A_WT | 2404 | 145723046 | 145723175 | 2.28 | LRRC24    | chr8  | - | 114   | NM_001024678 |
| D3A_WT | 324  | 525648    | 526092    | 3.09 | LRRC56    | chr11 | + | -1651 | NM_198075    |
| D3A_WT | 323  | 521954    | 523893    | 3.31 | LRRC56    | chr11 | + | -4598 | NM_198075    |
| D3A_WT | 1511 | 238200720 | 238201052 | 2.72 | LRRFIP1   | chr2  | + | -76   | NM_001137550 |
| D3A_WT | 182  | 202920836 | 202920985 | 2.14 | LRRN2     | chr1  | - | 194   | NM_006338    |
| D3A_WT | 182  | 202920836 | 202920985 | 2.14 | LRRN2     | chr1  | - | 310   | NM_201630    |
| D3A_WT | 1544 | 5980792   | 5981011   | 3.98 | LRRN4     | chr20 | - | 1793  | NM_152611    |
| D3A_WT | 1653 | 46472810  | 46473390  | 2.59 | LSS       | chr21 | - | 66    | NM_002340    |
| D3A_WT | 1310 | 45794556  | 45794726  | 2.32 | LTBP4     | chr19 | + | -4475 | NM_001042545 |
| D3A_WT | 1311 | 45799040  | 45799608  | 2.59 | LTBP4     | chr19 | + | 208   | NM_001042545 |
| D3A_WT | 1310 | 45794556  | 45794726  | 2.32 | LTBP4     | chr19 | + | -339  | NM_001042544 |
| D3A_WT | 2380 | 143853452 | 143855001 | 3.71 | LYNX1     | chr8  | - | 2415  | NM_023946    |

|        |      |           |           |      |          |       |   |       |              |
|--------|------|-----------|-----------|------|----------|-------|---|-------|--------------|
| D3A_WT | 2380 | 143853452 | 143855001 | 3.71 | LYNX1    | chr8  | - | 1520  | NM_177477    |
| D3A_WT | 2380 | 143853452 | 143855001 | 3.71 | LYNX1    | chr8  | - | 1213  | NM_177476    |
| D3A_WT | 2378 | 143849378 | 143849597 | 2.69 | LYNX1    | chr8  | - | -1239 | NM_177458    |
| D3A_WT | 2379 | 143851354 | 143851798 | 2.37 | LYNX1    | chr8  | - | -3328 | NM_177458    |
| D3A_WT | 2380 | 143853452 | 143855001 | 3.71 | LYNX1    | chr8  | - | -5978 | NM_177458    |
| D3A_WT | 2380 | 143853452 | 143855001 | 3.71 | LYNX1    | chr8  | - | 2416  | NM_177457    |
| D3A_WT | 1315 | 47040258  | 47040417  | 2.07 | LYPD4    | chr19 | - | 11    | NM_173506    |
| D3A_WT | 2018 | 130528552 | 130528701 | 2.31 | LYRM7    | chr5  | + | -5913 | NM_181705    |
| D3A_WT | 1548 | 13923870  | 13924144  | 2.26 | MACROD2  | chr20 | + | -138  | NM_080676    |
| D3A_WT | 1139 | 442288    | 442612    | 2.4  | MADCAM1  | chr19 | + | -5039 | NM_130762    |
| D3A_WT | 896  | 78190449  | 78191468  | 2.5  | MAF      | chr16 | - | 1165  | NM_005360    |
| D3A_WT | 2397 | 145224590 | 145224864 | 2.26 | MAF1     | chr8  | + | -6565 | NM_032272    |
| D3A_WT | 1562 | 38752335  | 38753704  | 3.89 | MAFB     | chr20 | - | -1729 | NM_005461    |
| D3A_WT | 2600 | 151037870 | 151039019 | 2.81 | MAGEA5   | chrX  | - | -1344 | NM_021049    |
| D3A_WT | 715  | 21442789  | 21443453  | 2.12 | MAGEL2   | chr15 | - | 965   | NM_019066    |
| D3A_WT | 969  | 21127904  | 21128338  | 3.01 | MAP2K3   | chr17 | + | -439  | NM_145109    |
| D3A_WT | 969  | 21127904  | 21128338  | 3.01 | MAP2K3   | chr17 | + | -7252 | NM_002756    |
| D3A_WT | 1306 | 45389917  | 45390151  | 2.75 | MAP3K10  | chr19 | + | 544   | NM_002446    |
| D3A_WT | 416  | 65142605  | 65142929  | 2.11 | MAP3K11  | chr11 | - | -4471 | NM_002419    |
| D3A_WT | 92   | 36394154  | 36395738  | 2.74 | MAP7D1   | chr1  | + | 557   | NM_018067    |
| D3A_WT | 2060 | 179651468 | 179651918 | 2.26 | MAPK9    | chr5  | - | -16   | NM_139070    |
| D3A_WT | 1794 | 50624131  | 50624260  | 2.33 | MAPKAPK3 | chr3  | + | -5409 | NM_004635    |
| D3A_WT | 2129 | 114283083 | 114283217 | 2.64 | MARCKS   | chr6  | + | -2069 | NM_002356    |
| D3A_WT | 272  | 99463303  | 99463843  | 2.77 | MARVELD1 | chr10 | + | 103   | NR_026753    |
| D3A_WT | 1201 | 3758639   | 3759322   | 3.78 | MATK     | chr19 | - | -6170 | NM_002378    |
| D3A_WT | 1174 | 1543152   | 1543306   | 2.33 | MBD3     | chr19 | - | 423   | NM_003926    |
| D3A_WT | 1126 | 72973034  | 72974351  | 4.39 | MBP      | chr18 | - | 70    | NM_001025101 |
| D3A_WT | 1107 | 13813373  | 13813592  | 2.93 | MCSR     | chr18 | + | -2282 | NM_005913    |
| D3A_WT | 626  | 112675083 | 112675217 | 2.13 | MCF2L    | chr13 | + | -6505 | NM_024979    |
| D3A_WT | 1714 | 39406776  | 39406905  | 2.46 | MCHR1    | chr22 | + | 1713  | NM_005297    |
| D3A_WT | 1654 | 46530979  | 46531154  | 2    | MCM3AP   | chr21 | - | -1402 | NM_003906    |
| D3A_WT | 1653 | 46472810  | 46473390  | 2.59 | MCM3APAS | chr21 | + | -485  | NR_002776    |
| D3A_WT | 2133 | 119297807 | 119298161 | 2.08 | MCM9     | chr6  | - | 18    | NM_153255    |
| D3A_WT | 1423 | 63668848  | 63669197  | 2.35 | MDH1     | chr2  | + | -603  | NM_005917    |
| D3A_WT | 2115 | 90585964  | 90586123  | 2.05 | MDN1     | chr6  | - | 120   | NM_014611    |
| D3A_WT | 85   | 29436762  | 29437211  | 2.43 | MECR     | chr1  | - | -6945 | NM_016011    |
| D3A_WT | 685  | 100358015 | 100358290 | 2.37 | MEG3     | chr14 | + | -4063 | NR_002766    |
| D3A_WT | 685  | 100358015 | 100358290 | 2.37 | MEG3     | chr14 | + | -4045 | NR_003531    |
| D3A_WT | 1718 | 40425797  | 40426061  | 2.57 | MEI1     | chr22 | + | 466   | NM_152513    |
| D3A_WT | 761  | 79082450  | 79082904  | 2.97 | MESDC1   | chr15 | + | 2328  | NM_022566    |
| D3A_WT | 769  | 88121103  | 88121447  | 3.11 | MESP2    | chr15 | + | 683   | NM_001039958 |
| D3A_WT | 1098 | 2561372   | 2561731   | 2.62 | METTL4   | chr18 | - | -62   | NM_022840    |
| D3A_WT | 851  | 21514646  | 21514872  | 2.49 | METTL9   | chr16 | + | -3597 | NM_016025    |
| D3A_WT | 68   | 17185769  | 17187694  | 4.42 | MFAP2    | chr1  | - | -6971 | NM_002403    |
| D3A_WT | 68   | 17185769  | 17187694  | 4.42 | MFAP2    | chr1  | - | -6063 | NM_017459    |
| D3A_WT | 1949 | 171183838 | 171184786 | 3.63 | MFAP3L   | chr4  | - | -308  | NM_021647    |
| D3A_WT | 1053 | 72244201  | 72244435  | 2.1  | MFSD11   | chr17 | + | -1059 | NM_024311    |

|        |      |           |           |      |           |       |   |       |              |
|--------|------|-----------|-----------|------|-----------|-------|---|-------|--------------|
| D3A_WT | 1862 | 672677    | 672896    | 2.39 | MFSD7     | chr4  | - | 187   | NM_032219    |
| D3A_WT | 733  | 39739853  | 39740477  | 3.29 | MGA       | chr15 | + | 264   | NM_001080541 |
| D3A_WT | 968  | 20348270  | 20348574  | 2.01 | MGC102966 | chr17 | - | -19   | NR_029393    |
| D3A_WT | 704  | 104353153 | 104353577 | 2.23 | MGC23270  | chr14 | + | -5217 | NR_024396    |
| D3A_WT | 2026 | 138758011 | 138758840 | 2.44 | MGC29506  | chr5  | - | -4921 | NM_016459    |
| D3A_WT | 2404 | 145723046 | 145723175 | 2.28 | MGC70857  | chr8  | - | 2156  | NM_001001795 |
| D3A_WT | 195  | 220858172 | 220858326 | 2.03 | MIA3      | chr1  | + | 183   | NM_198551    |
| D3A_WT | 1686 | 22566497  | 22567135  | 3.72 | MIF       | chr22 | + | 252   | NM_002415    |
| D3A_WT | 1049 | 70779090  | 70779224  | 2.16 | MIF4GD    | chr17 | - | -259  | NM_020679    |
| D3A_WT | 1752 | 49274238  | 49274382  | 2.08 | MIOX      | chr22 | + | 2232  | NM_017584    |
| D3A_WT | 1482 | 176725109 | 176725354 | 3.09 | MIR10B    | chr2  | + | 1955  | NR_029609    |
| D3A_WT | 1586 | 60562679  | 60563333  | 2.5  | MIR1-1    | chr20 | + | 1049  | NR_029780    |
| D3A_WT | 2401 | 145593628 | 145594177 | 2.98 | MIR1234   | chr8  | - | 2465  | NR_031600    |
| D3A_WT | 1591 | 61273131  | 61273965  | 2.22 | MIR124-3  | chr20 | + | -6748 | NR_029670    |
| D3A_WT | 686  | 100418281 | 100418530 | 2.69 | MIR127    | chr14 | + | -663  | NR_029696    |
| D3A_WT | 1716 | 39817855  | 39818618  | 2.99 | MIR1281   | chr22 | + | -226  | NR_031694    |
| D3A_WT | 934  | 1900012   | 1901172   | 2.91 | MIR132    | chr17 | - | -540  | NR_029674    |
| D3A_WT | 686  | 100418281 | 100418530 | 2.69 | MIR136    | chr14 | + | -2386 | NR_029699    |
| D3A_WT | 1492 | 219867704 | 219868128 | 2.64 | MIR153-1  | chr2  | - | -750  | NR_029688    |
| D3A_WT | 2308 | 157066095 | 157066369 | 2.02 | MIR153-2  | chr7  | - | -6357 | NR_029689    |
| D3A_WT | 1177 | 1766486   | 1770324   | 4.16 | MIR1909   | chr19 | - | -1168 | NR_031730    |
| D3A_WT | 1788 | 49034806  | 49034950  | 2.87 | MIR191    | chr3  | - | -1732 | NR_029690    |
| D3A_WT | 1787 | 49030836  | 49031362  | 2.96 | MIR191    | chr3  | - | 2047  | NR_029690    |
| D3A_WT | 1605 | 62047107  | 62047846  | 2.38 | MIR1914   | chr20 | - | -4135 | NR_031735    |
| D3A_WT | 846  | 14303558  | 14304388  | 2.74 | MIR193B   | chr16 | + | -1351 | NR_030177    |
| D3A_WT | 946  | 6859288   | 6859557   | 2.25 | MIR195    | chr17 | - | 2322  | NR_029712    |
| D3A_WT | 291  | 115929228 | 115929362 | 2.42 | MIR2110   | chr10 | - | -5367 | NR_031747    |
| D3A_WT | 934  | 1900012   | 1901172   | 2.91 | MIR212    | chr17 | - | -168  | NR_029625    |
| D3A_WT | 2453 | 96885443  | 96885887  | 2.5  | MIR23B    | chr9  | + | -1645 | NR_029664    |
| D3A_WT | 2453 | 96885443  | 96885887  | 2.5  | MIR24-1   | chr9  | + | -2458 | NR_029496    |
| D3A_WT | 1770 | 37983234  | 37983758  | 3.27 | MIR26A1   | chr3  | + | -2402 | NR_029499    |
| D3A_WT | 2453 | 96885443  | 96885887  | 2.5  | MIR27B    | chr9  | + | -1882 | NR_029665    |
| D3A_WT | 2331 | 22158097  | 22158446  | 2.39 | MIR320A   | chr8  | - | 230   | NR_029714    |
| D3A_WT | 947  | 7070974   | 7071398   | 2.41 | MIR324    | chr17 | - | -3764 | NR_029896    |
| D3A_WT | 443  | 74730517  | 74730666  | 2.18 | MIR326    | chr11 | - | -6713 | NR_029891    |
| D3A_WT | 883  | 65795095  | 65795844  | 3.3  | MIR328    | chr16 | - | -1670 | NR_029887    |
| D3A_WT | 54   | 9139822   | 9139966   | 2.49 | MIR34A    | chr1  | - | -5471 | NR_029610    |
| D3A_WT | 846  | 14303558  | 14304388  | 2.74 | MIR365-1  | chr16 | + | -6669 | NR_029854    |
| D3A_WT | 1788 | 49034806  | 49034950  | 2.87 | MIR425    | chr3  | - | -2207 | NR_029948    |
| D3A_WT | 1787 | 49030836  | 49031362  | 2.96 | MIR425    | chr3  | - | 1572  | NR_029948    |
| D3A_WT | 686  | 100418281 | 100418530 | 2.69 | MIR431    | chr14 | + | 1309  | NR_029965    |
| D3A_WT | 686  | 100418281 | 100418530 | 2.69 | MIR432    | chr14 | + | -2167 | NR_030173    |
| D3A_WT | 686  | 100418281 | 100418530 | 2.69 | MIR433    | chr14 | + | 430   | NR_029966    |
| D3A_WT | 1995 | 54504835  | 54504999  | 2.19 | MIR449A   | chr5  | - | -2710 | NR_029960    |
| D3A_WT | 1995 | 54504835  | 54504999  | 2.19 | MIR449B   | chr5  | - | -2590 | NR_030387    |
| D3A_WT | 1995 | 54504835  | 54504999  | 2.19 | MIR449C   | chr5  | - | -979  | NR_031572    |
| D3A_WT | 946  | 6859288   | 6859557   | 2.25 | MIR497    | chr17 | - | 2643  | NR_030178    |

|        |      |           |           |      |         |       |   |       |              |
|--------|------|-----------|-----------|------|---------|-------|---|-------|--------------|
| D3A_WT | 275  | 102719542 | 102719716 | 2.32 | MIR608  | chr10 | + | -5102 | NR_030339    |
| D3A_WT | 1053 | 72244201  | 72244435  | 2.1  | MIR636  | chr17 | - | -93   | NR_030366    |
| D3A_WT | 1237 | 10689734  | 10690503  | 3.33 | MIR638  | chr19 | + | 39    | NR_030368    |
| D3A_WT | 1568 | 48630542  | 48630806  | 2.58 | MIR645  | chr20 | + | -5055 | NR_030375    |
| D3A_WT | 1605 | 62047107  | 62047846  | 2.38 | MIR647  | chr20 | - | -2953 | NR_030377    |
| D3A_WT | 158  | 153434174 | 153434309 | 2.43 | MIR92B  | chr1  | + | 2650  | NR_030281    |
| D3A_WT | 767  | 87711984  | 87712932  | 2.5  | MIR9-3  | chr15 | + | 207   | NR_029692    |
| D3A_WT | 2401 | 145593628 | 145594177 | 2.98 | MIR939  | chr8  | - | -3649 | NR_030635    |
| D3A_WT | 821  | 2257723   | 2258562   | 2.36 | MIR940  | chr16 | + | -3606 | NR_030636    |
| D3A_WT | 1806 | 69871241  | 69871575  | 2.78 | MITF    | chr3  | + | 86    | NM_198159    |
| D3A_WT | 237  | 28074583  | 28075127  | 2.78 | MKX     | chr10 | - | -71   | NM_173576    |
| D3A_WT | 1954 | 185892205 | 185892334 | 2.16 | MLF1IP  | chr4  | - | 11    | NM_024629    |
| D3A_WT | 600  | 48692282  | 48693126  | 2.06 | MLNR    | chr13 | + | 230   | NM_001507    |
| D3A_WT | 1510 | 238062992 | 238063121 | 2.08 | MLPH    | chr2  | + | 2440  | NM_001042467 |
| D3A_WT | 996  | 37972332  | 37973071  | 3.11 | MLX     | chr17 | + | 98    | NM_198205    |
| D3A_WT | 109  | 45731326  | 45731654  | 2.4  | MMACHC  | chr1  | + | -6952 | NM_015506    |
| D3A_WT | 638  | 22376478  | 22376852  | 2.78 | MMP14   | chr14 | + | 1033  | NM_004995    |
| D3A_WT | 1944 | 154485160 | 154486406 | 2.97 | MND1    | chr4  | + | 533   | NM_032117    |
| D3A_WT | 2305 | 156495320 | 156496299 | 3.33 | MNX1    | chr7  | - | -919  | NM_001165255 |
| D3A_WT | 2305 | 156495320 | 156496299 | 3.33 | MNX1    | chr7  | - | 299   | NM_005515    |
| D3A_WT | 2420 | 27519138  | 27519462  | 2.87 | MOBK12B | chr9  | - | 550   | NM_024761    |
| D3A_WT | 2263 | 100631847 | 100632071 | 2.46 | MOGAT3  | chr7  | - | -937  | NM_178176    |
| D3A_WT | 1790 | 49942408  | 49942784  | 3.15 | MON1A   | chr3  | - | -147  | NM_001142501 |
| D3A_WT | 894  | 75785137  | 75785591  | 2.34 | MON1B   | chr16 | + | 3028  | NM_014940    |
| D3A_WT | 1695 | 29695189  | 29695323  | 2.25 | MORC2   | chr22 | - | -1069 | NM_014941    |
| D3A_WT | 2258 | 100047940 | 100048674 | 2.98 | MOSPD3  | chr7  | + | 258   | NM_023948    |
| D3A_WT | 2258 | 100047940 | 100048674 | 2.98 | MOSPD3  | chr7  | + | 319   | NM_001040098 |
| D3A_WT | 2258 | 100047940 | 100048674 | 2.98 | MOSPD3  | chr7  | + | 647   | NM_001040097 |
| D3A_WT | 949  | 7427431   | 7428065   | 2.59 | MPDU1   | chr17 | + | 60    | NM_004870    |
| D3A_WT | 2212 | 24579727  | 24581101  | 3.57 | MPP6    | chr7  | + | 805   | NM_016447    |
| D3A_WT | 1705 | 35744338  | 35744472  | 2.62 | MPST    | chr22 | + | -1242 | NM_021126    |
| D3A_WT | 369  | 3201824   | 3202373   | 2.89 | MRGPRG  | chr11 | - | -5479 | NM_001164377 |
| D3A_WT | 584  | 20649101  | 20649355  | 2.65 | MRP63   | chr13 | + | 857   | NM_024026    |
| D3A_WT | 785  | 363906    | 365160    | 2.62 | MRPL28  | chr16 | - | -3992 | NM_006428    |
| D3A_WT | 786  | 365901    | 368667    | 3.2  | MRPL28  | chr16 | - | -6743 | NM_006428    |
| D3A_WT | 784  | 361431    | 362955    | 3.57 | MRPL28  | chr16 | - | -1652 | NM_006428    |
| D3A_WT | 94   | 36702163  | 36702492  | 3.08 | MRPS15  | chr1  | - | 300   | NM_031280    |
| D3A_WT | 145  | 148534404 | 148534547 | 2.37 | MRPS21  | chr1  | + | 1583  | NM_018997    |
| D3A_WT | 2349 | 72918204  | 72919359  | 3.57 | MSC     | chr8  | - | 504   | NM_005098    |
| D3A_WT | 1419 | 47864093  | 47864655  | 3.22 | MSH6    | chr2  | + | 650   | NM_000179    |
| D3A_WT | 989  | 35531962  | 35532123  | 2.09 | MSL1    | chr17 | + | -273  | NM_001012241 |
| D3A_WT | 798  | 778442    | 779106    | 3.44 | MSLNL   | chr16 | - | -5847 | NM_001025190 |
| D3A_WT | 2325 | 9949354   | 9950088   | 2.34 | MSRA    | chr8  | + | 482   | NM_001135670 |
| D3A_WT | 234  | 23424155  | 23424716  | 2.22 | MSRB2   | chr10 | + | 3     | NM_012228    |
| D3A_WT | 531  | 63958467  | 63959645  | 2.69 | MSRB3   | chr12 | + | 302   | NM_198080    |
| D3A_WT | 1789 | 49699702  | 49699851  | 2.06 | MST1    | chr3  | - | 1424  | NM_020998    |
| D3A_WT | 1889 | 4912837   | 4913088   | 2.47 | MSX1    | chr4  | + | 670   | NM_002448    |

|        |      |           |           |      |            |       |   |       |              |
|--------|------|-----------|-----------|------|------------|-------|---|-------|--------------|
| D3A_WT | 1888 | 4909539   | 4910058   | 2.79 | MSX1       | chr4  | + | -2494 | NM_002448    |
| D3A_WT | 2093 | 37061536  | 37062580  | 3.03 | MTCH1      | chr6  | - | -131  | NM_014341    |
| D3A_WT | 2615 | 153952695 | 153952976 | 2.78 | MTCP1      | chrX  | - | -94   | NM_001018025 |
| D3A_WT | 2615 | 153952695 | 153952976 | 2.78 | MTCP1NB    | chrX  | - | -94   | NM_001018024 |
| D3A_WT | 1917 | 75242920  | 75243383  | 3.26 | MTHFD2L    | chr4  | + | 459   | NM_001144978 |
| D3A_WT | 158  | 153434174 | 153434309 | 2.43 | MUC1       | chr1  | - | -4917 | NM_001044392 |
| D3A_WT | 1853 | 197023887 | 197024116 | 2.23 | MUC4       | chr3  | - | -456  | NM_138297    |
| D3A_WT | 1165 | 1305111   | 1306266   | 2.09 | MUM1       | chr19 | + | -1634 | NR_024247    |
| D3A_WT | 1165 | 1305111   | 1306266   | 2.09 | MUM1       | chr19 | + | -287  | NM_032853    |
| D3A_WT | 326  | 618385    | 618804    | 3.37 | MUPCDH     | chr11 | - | -3587 | NM_031264    |
| D3A_WT | 288  | 111975252 | 111977131 | 3.59 | MXI1       | chr10 | + | 440   | NM_005962    |
| D3A_WT | 14   | 1280314   | 1280886   | 3.27 | MXRA8      | chr1  | - | 3178  | NM_032348    |
| D3A_WT | 1356 | 59061487  | 59062860  | 3.54 | MYADM      | chr19 | + | -775  | NM_138373    |
| D3A_WT | 1356 | 59061487  | 59062860  | 3.54 | MYADM      | chr19 | + | -2298 | NM_001020821 |
| D3A_WT | 1356 | 59061487  | 59062860  | 3.54 | MYADM      | chr19 | + | -2419 | NM_001020818 |
| D3A_WT | 1356 | 59061487  | 59062860  | 3.54 | MYADM      | chr19 | + | 751   | NM_001020820 |
| D3A_WT | 1412 | 33805666  | 33805920  | 2.48 | MYADML     | chr2  | - | 995   | NR_003143    |
| D3A_WT | 399  | 47333975  | 47335020  | 3.79 | MYBPC3     | chr11 | - | -3668 | NM_000256    |
| D3A_WT | 1018 | 45940648  | 45940809  | 2.39 | MYCBPAP    | chr17 | + | -15   | NM_032133    |
| D3A_WT | 1399 | 16000164  | 16000691  | 2.34 | MYCN       | chr2  | + | 2294  | NM_005378    |
| D3A_WT | 1399 | 16000164  | 16000691  | 2.34 | MYCNOS     | chr2  | - | -1131 | NR_026766    |
| D3A_WT | 431  | 68818120  | 68818249  | 2.05 | MYEOV      | chr11 | + | -13   | NM_138768    |
| D3A_WT | 1778 | 46886357  | 46886788  | 2.81 | MYL3       | chr3  | - | -6595 | NM_000258    |
| D3A_WT | 1559 | 34602616  | 34603661  | 2.9  | MYL9       | chr20 | + | -172  | NM_181526    |
| D3A_WT | 1485 | 191818278 | 191818557 | 2.36 | MYO1B      | chr2  | + | 66    | NM_012223    |
| D3A_WT | 1485 | 191818278 | 191818557 | 2.36 | MYO1B      | chr2  | + | -81   | NM_001161819 |
| D3A_WT | 956  | 12509669  | 12510303  | 2.59 | MYOCD      | chr17 | + | 55    | NM_153604    |
| D3A_WT | 2051 | 177472965 | 177473313 | 2.81 | N4BP3      | chr5  | + | -22   | NM_015111    |
| D3A_WT | 2362 | 102443834 | 102443958 | 2.31 | NACAP1     | chr8  | + | -6400 | NR_002182    |
| D3A_WT | 1248 | 13090027  | 13090466  | 2.52 | NACC1      | chr19 | + | 138   | NM_052876    |
| D3A_WT | 1002 | 39437676  | 39438745  | 2.45 | NAGS       | chr17 | + | 653   | NM_153006    |
| D3A_WT | 1327 | 51109411  | 51109625  | 2.73 | NANOS2     | chr19 | - | 358   | NM_001029861 |
| D3A_WT | 533  | 74764430  | 74765397  | 3.52 | NAP1L1     | chr12 | - | 92    | NM_004537    |
| D3A_WT | 1369 | 60686420  | 60686879  | 2.34 | NAT14      | chr19 | + | -1756 | NM_020378    |
| D3A_WT | 1370 | 60690828  | 60692293  | 3.42 | NAT14      | chr19 | + | 3155  | NM_020378    |
| D3A_WT | 1880 | 2030086   | 2030335   | 2.63 | NAT8L      | chr4  | + | -826  | NM_178557    |
| D3A_WT | 1881 | 2031185   | 2031419   | 2.62 | NAT8L      | chr4  | + | 266   | NM_178557    |
| D3A_WT | 1043 | 70283969  | 70284123  | 2.69 | NAT9       | chr17 | - | 19    | NM_015654    |
| D3A_WT | 69   | 19843141  | 19843770  | 2.35 | NBL1       | chr1  | + | 61    | NM_005380    |
| D3A_WT | 69   | 19843141  | 19843770  | 2.35 | NBL1       | chr1  | + | 1143  | NM_182744    |
| D3A_WT | 2357 | 91066502  | 91066733  | 2.64 | NBN        | chr8  | - | -542  | NM_002485    |
| D3A_WT | 72   | 21639241  | 21639495  | 2.74 | NBPF3      | chr1  | + | 151   | NM_032264    |
| D3A_WT | 91   | 35795560  | 35796607  | 2.52 | NCDN       | chr1  | + | 104   | NM_014284    |
| D3A_WT | 1785 | 48698183  | 48698537  | 2.47 | NCKIPSD    | chr3  | - | -22   | NM_184231    |
| D3A_WT | 861  | 30844521  | 30844770  | 3    | NCRNA00095 | chr16 | - | -2554 | NR_024348    |
| D3A_WT | 2537 | 1474896   | 1475440   | 2.87 | NCRNA00105 | chrX  | + | -4255 | NR_026710    |
| D3A_WT | 1825 | 133923659 | 133923923 | 2.66 | NCRNA00119 | chr3  | + | -84   | NR_002811    |

|        |      |           |           |      |            |       |   |       |              |
|--------|------|-----------|-----------|------|------------|-------|---|-------|--------------|
| D3A_WT | 1381 | 63553766  | 63553915  | 2.13 | NCRNA00181 | chr19 | + | -1307 | NR_015380    |
| D3A_WT | 1098 | 2561372   | 2561731   | 2.62 | NDC80      | chr18 | + | 42    | NM_006101    |
| D3A_WT | 1788 | 49034806  | 49034950  | 2.87 | NDUFAF3    | chr3  | + | 1967  | NM_199074    |
| D3A_WT | 1787 | 49030836  | 49031362  | 2.96 | NDUFAF3    | chr3  | + | -1812 | NM_199074    |
| D3A_WT | 1788 | 49034806  | 49034950  | 2.87 | NDUFAF3    | chr3  | + | 1257  | NM_199073    |
| D3A_WT | 1787 | 49030836  | 49031362  | 2.96 | NDUFAF3    | chr3  | + | -2522 | NM_199073    |
| D3A_WT | 1788 | 49034806  | 49034950  | 2.87 | NDUFAF3    | chr3  | + | 801   | NM_199069    |
| D3A_WT | 1787 | 49030836  | 49031362  | 2.96 | NDUFAF3    | chr3  | + | -2978 | NM_199069    |
| D3A_WT | 66   | 16639978  | 16640137  | 2.14 | NECAP2     | chr1  | + | 304   | NM_001145277 |
| D3A_WT | 541  | 95825099  | 95825854  | 2.97 | NEDD1      | chr12 | + | 102   | NM_001135175 |
| D3A_WT | 541  | 95825099  | 95825854  | 2.97 | NEDD1      | chr12 | + | 345   | NM_001135176 |
| D3A_WT | 1122 | 53862643  | 53863099  | 2.35 | NEDD4L     | chr18 | + | 255   | NM_015277    |
| D3A_WT | 1122 | 53862643  | 53863099  | 2.35 | NEDD4L     | chr18 | + | -2584 | NM_001144964 |
| D3A_WT | 870  | 45734870  | 45735204  | 2.58 | NETO2      | chr16 | - | 372   | NM_018092    |
| D3A_WT | 1484 | 182258033 | 182258194 | 2.4  | NEUROD1    | chr2  | - | -4487 | NM_002500    |
| D3A_WT | 1130 | 75262972  | 75263131  | 2.38 | NFATC1     | chr18 | + | 1738  | NM_172387    |
| D3A_WT | 889  | 66671103  | 66671557  | 2.21 | NFATC3     | chr16 | + | -5545 | NM_173165    |
| D3A_WT | 643  | 23904926  | 23905175  | 2.1  | NFATC4     | chr14 | + | -934  | NM_001136022 |
| D3A_WT | 644  | 23906626  | 23907961  | 2.47 | NFATC4     | chr14 | + | 1309  | NM_001136022 |
| D3A_WT | 643  | 23904926  | 23905175  | 2.1  | NFATC4     | chr14 | + | -2015 | NM_004554    |
| D3A_WT | 644  | 23906626  | 23907961  | 2.47 | NFATC4     | chr14 | + | 228   | NM_004554    |
| D3A_WT | 2415 | 14303278  | 14304038  | 2.81 | NFIB       | chr9  | - | 287   | NM_005596    |
| D3A_WT | 1245 | 12962783  | 12963252  | 3.21 | NFIX       | chr19 | + | -4566 | NM_002501    |
| D3A_WT | 1246 | 12968184  | 12969053  | 2.31 | NFIX       | chr19 | + | 1035  | NM_002501    |
| D3A_WT | 2096 | 41148788  | 41149222  | 2.97 | NFYA       | chr6  | + | 321   | NM_021705    |
| D3A_WT | 665  | 76806129  | 76807166  | 2.51 | NGB        | chr14 | - | 761   | NM_021257    |
| D3A_WT | 594  | 38509768  | 38509927  | 2.29 | NHLRC3     | chr13 | + | -607  | NM_001017370 |
| D3A_WT | 788  | 550357    | 550906    | 2.96 | NHLRC4     | chr16 | + | -6401 | NM_176677    |
| D3A_WT | 789  | 551822    | 552101    | 2.36 | NHLRC4     | chr16 | + | -5071 | NM_176677    |
| D3A_WT | 2134 | 124166212 | 124166436 | 2.88 | NKAIN2     | chr6  | + | -443  | NM_001040214 |
| D3A_WT | 649  | 36120439  | 36121420  | 2.57 | NKX2-8     | chr14 | - | 608   | NM_014360    |
| D3A_WT | 1896 | 13152650  | 13153504  | 2.64 | NKX3-2     | chr4  | - | 2135  | NM_001189    |
| D3A_WT | 306  | 134450252 | 134450426 | 2.29 | NKX6-2     | chr10 | - | -812  | NM_177400    |
| D3A_WT | 981  | 30493024  | 30493188  | 2.28 | NLE1       | chr17 | - | 329   | NM_018096    |
| D3A_WT | 1020 | 46598589  | 46599149  | 2.35 | NME2       | chr17 | + | -10   | NM_001018139 |
| D3A_WT | 1020 | 46598589  | 46599149  | 2.35 | NME2       | chr17 | + | -212  | NM_001018138 |
| D3A_WT | 1020 | 46598589  | 46599149  | 2.35 | NME2       | chr17 | + | 980   | NM_001018137 |
| D3A_WT | 1020 | 46598589  | 46599149  | 2.35 | NME2       | chr17 | + | 232   | NM_002512    |
| D3A_WT | 839  | 4466252   | 4467016   | 2.32 | NMRAL1     | chr16 | - | -1737 | NM_020677    |
| D3A_WT | 267  | 96111093  | 96111231  | 2.06 | NOC3L      | chr10 | - | 1511  | NM_022451    |
| D3A_WT | 2219 | 30484897  | 30485349  | 2.7  | NOD1       | chr7  | - | -205  | NM_006092    |
| D3A_WT | 875  | 49284054  | 49284433  | 2.54 | NOD2       | chr16 | + | -4307 | NM_022162    |
| D3A_WT | 1884 | 2937173   | 2937649   | 2.5  | NOP14      | chr4  | - | -2495 | NM_003703    |
| D3A_WT | 1431 | 73283704  | 73284172  | 2.51 | NOTO       | chr2  | + | 1045  | NM_001134462 |
| D3A_WT | 1609 | 62207436  | 62208509  | 2.61 | NPBWR2     | chr20 | - | 656   | NM_005286    |
| D3A_WT | 1825 | 133923659 | 133923923 | 2.66 | NPHP3      | chr3  | - | 175   | NM_153240    |
| D3A_WT | 41   | 5974251   | 5975899   | 3.03 | NPHP4      | chr1  | - | 43    | NM_015102    |

|        |      |           |           |      |         |       |   |       |              |
|--------|------|-----------|-----------|------|---------|-------|---|-------|--------------|
| D3A_WT | 1346 | 55571615  | 55572074  | 2.11 | NR1H2   | chr19 | + | 348   | NM_007121    |
| D3A_WT | 1765 | 14963752  | 14964191  | 2.15 | NR2C2   | chr3  | + | -268  | NM_003298    |
| D3A_WT | 2125 | 108596632 | 108597166 | 2.58 | NR2E1   | chr6  | + | 2992  | NM_003269    |
| D3A_WT | 2474 | 126306329 | 126306902 | 3.02 | NR5A1   | chr9  | - | 2905  | NM_004959    |
| D3A_WT | 2475 | 126310551 | 126310691 | 2.53 | NR5A1   | chr9  | - | -1101 | NM_004959    |
| D3A_WT | 2028 | 139401975 | 139402614 | 4.12 | NRG2    | chr5  | - | 769   | NM_013981    |
| D3A_WT | 1487 | 206255234 | 206256370 | 2.16 | NRP2    | chr2  | + | 334   | NM_201279    |
| D3A_WT | 2130 | 116528726 | 116528860 | 2.08 | NT5DC1  | chr6  | + | 102   | NM_152729    |
| D3A_WT | 1798 | 52544911  | 52546108  | 2.73 | NT5DC2  | chr3  | - | -1376 | NM_022908    |
| D3A_WT | 1798 | 52544911  | 52546108  | 2.73 | NT5DC2  | chr3  | - | -2676 | NM_001134231 |
| D3A_WT | 959  | 17147420  | 17147854  | 2.58 | NT5M    | chr17 | + | 233   | NM_020201    |
| D3A_WT | 955  | 8866402   | 8867441   | 3.63 | NTN1    | chr17 | + | 1338  | NM_004822    |
| D3A_WT | 822  | 2457718   | 2457981   | 2.25 | NTN3    | chr16 | + | -3651 | NM_006181    |
| D3A_WT | 540  | 94708848  | 94709167  | 3.26 | NTN4    | chr12 | - | -340  | NM_021229    |
| D3A_WT | 2502 | 134027855 | 134028407 | 2.93 | NTNG2   | chr9  | + | 977   | NM_032536    |
| D3A_WT | 81   | 27120979  | 27121193  | 2.76 | NUDC    | chr1  | + | 276   | NM_006600    |
| D3A_WT | 706  | 104724079 | 104724634 | 2.9  | NUDT14  | chr14 | - | -5651 | NM_177533    |
| D3A_WT | 1763 | 13436554  | 13437003  | 3.59 | NUP210  | chr3  | - | 31    | NM_024923    |
| D3A_WT | 1919 | 77292284  | 77292764  | 2.9  | NUP54   | chr4  | - | -3845 | NM_017426    |
| D3A_WT | 1048 | 70713713  | 70713944  | 2.35 | NUP85   | chr17 | + | 637   | NM_024844    |
| D3A_WT | 933  | 828760    | 830440    | 2.28 | NXN     | chr17 | - | 160   | NM_022463    |
| D3A_WT | 1184 | 2220450   | 2221995   | 3.12 | OAZ1    | chr19 | + | 703   | NM_004152    |
| D3A_WT | 282  | 105667991 | 105668340 | 3.01 | OBFC1   | chr10 | - | -130  | NM_024928    |
| D3A_WT | 1495 | 220143571 | 220144025 | 2.65 | OBSL1   | chr2  | - | 457   | NM_015311    |
| D3A_WT | 716  | 26023615  | 26024392  | 3.22 | OCA2    | chr15 | - | -5950 | NM_000275    |
| D3A_WT | 1589 | 60907212  | 60907831  | 2.7  | OGFR    | chr20 | + | 900   | NM_007346    |
| D3A_WT | 2506 | 137101223 | 137101347 | 2.24 | OLFM1   | chr9  | + | -5624 | NM_014279    |
| D3A_WT | 2507 | 137107097 | 137108273 | 2.44 | OLFM1   | chr9  | + | 776   | NM_014279    |
| D3A_WT | 2506 | 137101223 | 137101347 | 2.24 | OLFM1   | chr9  | + | -5638 | NM_006334    |
| D3A_WT | 2507 | 137107097 | 137108273 | 2.44 | OLFM1   | chr9  | + | 762   | NM_006334    |
| D3A_WT | 2140 | 137855747 | 137856681 | 4    | OLIG3   | chr6  | - | 1010  | NM_175747    |
| D3A_WT | 1121 | 53253630  | 53254073  | 2.51 | ONECUT2 | chr18 | + | -63   | NM_004852    |
| D3A_WT | 1176 | 1700186   | 1700939   | 3.21 | ONECUT3 | chr19 | + | -4099 | NM_001080488 |
| D3A_WT | 1257 | 15784996  | 15785432  | 2.48 | OR10H1  | chr19 | - | -5278 | NM_013940    |
| D3A_WT | 219  | 245988164 | 245988422 | 2.62 | OR1C1   | chr1  | - | 38    | NM_012353    |
| D3A_WT | 2265 | 101860257 | 101861091 | 2.73 | ORAI2   | chr7  | + | -326  | NM_032831    |
| D3A_WT | 2111 | 88356351  | 88356496  | 2.07 | ORC3L   | chr6  | + | -138  | NM_181837    |
| D3A_WT | 1483 | 178766881 | 178767025 | 2.43 | OSBPL6  | chr2  | + | -666  | NM_032523    |
| D3A_WT | 1401 | 19421776  | 19422212  | 2.21 | OSR1    | chr2  | - | -141  | NM_145260    |
| D3A_WT | 1406 | 26559280  | 26559513  | 2.82 | OTOF    | chr2  | - | -4982 | NM_194323    |
| D3A_WT | 1045 | 70438724  | 70439068  | 2.59 | OTOP3   | chr17 | + | -4595 | NM_178233    |
| D3A_WT | 418  | 65304952  | 65305782  | 2.48 | OVOL1   | chr11 | + | -5737 | NM_004561    |
| D3A_WT | 2577 | 69395945  | 69396314  | 2.07 | P2RY4   | chrX  | - | 250   | NM_002565    |
| D3A_WT | 2627 | 1622678   | 1622899   | 2.7  | P2RY8   | chrY  | - | -6751 | NM_178129    |
| D3A_WT | 252  | 74526061  | 74527485  | 2.94 | P4HA1   | chr10 | - | -35   | NM_001142596 |
| D3A_WT | 2361 | 101802701 | 101802925 | 2.9  | PABPC1  | chr8  | - | 678   | NM_002568    |
| D3A_WT | 447  | 76862082  | 76863454  | 2.65 | PAK1    | chr11 | - | -12   | NM_002576    |



|        |      |           |           |      |          |       |   |       |              |
|--------|------|-----------|-----------|------|----------|-------|---|-------|--------------|
| D3A_WT | 727  | 38318680  | 38322230  | 4.74 | PAK6     | chr15 | + | 1129  | NM_020168    |
| D3A_WT | 264  | 91394832  | 91394981  | 2.55 | PANK1    | chr10 | - | -1279 | NM_138316    |
| D3A_WT | 264  | 91394832  | 91394981  | 2.55 | PANK1    | chr10 | - | 289   | NM_148977    |
| D3A_WT | 28   | 2450216   | 2451160   | 3.2  | PANK4    | chr1  | - | -2793 | NM_018216    |
| D3A_WT | 2285 | 139409325 | 139409469 | 2.37 | PARP12   | chr7  | - | 593   | NM_022750    |
| D3A_WT | 376  | 12356011  | 12356235  | 2.88 | PARVA    | chr11 | + | 402   | NM_018222    |
| D3A_WT | 1527 | 241737156 | 241737405 | 2.5  | PASK     | chr2  | - | 271   | NM_015148    |
| D3A_WT | 383  | 31796131  | 31796480  | 2.55 | PAX6     | chr11 | - | -6850 | NM_000280    |
| D3A_WT | 383  | 31796131  | 31796480  | 2.55 | PAX6     | chr11 | - | -220  | NM_001127612 |
| D3A_WT | 1454 | 113752291 | 113752640 | 2.01 | PAX8     | chr2  | - | 503   | NM_013951    |
| D3A_WT | 2301 | 154425725 | 154426758 | 3.32 | PAXIP1   | chr7  | - | -626  | NM_007349    |
| D3A_WT | 1426 | 70167920  | 70168155  | 2.05 | PCBP1    | chr2  | + | -51   | NM_006196    |
| D3A_WT | 2585 | 99551539  | 99552165  | 3.39 | PCDH19   | chrX  | - | 75    | NM_020766    |
| D3A_WT | 2584 | 99548742  | 99549666  | 3.03 | PCDH19   | chrX  | - | 2723  | NM_020766    |
| D3A_WT | 1906 | 30332534  | 30333398  | 3    | PCDH7    | chr4  | + | 1832  | NM_032457    |
| D3A_WT | 2030 | 140221932 | 140222057 | 2.61 | PCDHA11  | chr5  | + | -6020 | NM_018902    |
| D3A_WT | 2029 | 140183036 | 140183465 | 3.1  | PCDHA5   | chr5  | + | 1706  | NM_018908    |
| D3A_WT | 2029 | 140183036 | 140183465 | 3.1  | PCDHA6   | chr5  | + | -4583 | NM_031849    |
| D3A_WT | 2031 | 140779295 | 140779859 | 3.65 | PCDHGA11 | chr5  | + | -1143 | NM_032092    |
| D3A_WT | 2031 | 140779295 | 140779859 | 3.65 | PCDHGB7  | chr5  | + | 2112  | NM_018927    |
| D3A_WT | 2031 | 140779295 | 140779859 | 3.65 | PCDHGB8P | chr5  | + | -6459 | NR_001297    |
| D3A_WT | 986  | 34157422  | 34157977  | 2.6  | PCGF2    | chr17 | - | 385   | NM_007144    |
| D3A_WT | 1863 | 689592    | 690156    | 2.51 | PCGF3    | chr4  | + | 302   | NM_006315    |
| D3A_WT | 632  | 112911366 | 112912015 | 2.42 | PCID2    | chr13 | - | -660  | NM_001127202 |
| D3A_WT | 1541 | 5048566   | 5049020   | 2.03 | PCNA     | chr20 | - | -146  | NM_182649    |
| D3A_WT | 416  | 65142605  | 65142929  | 2.11 | PCNXL3   | chr11 | + | 2409  | NM_032223    |
| D3A_WT | 1171 | 1442020   | 1442264   | 2.11 | PCSK4    | chr19 | - | -735  | NM_017573    |
| D3A_WT | 778  | 99847513  | 99848283  | 3.56 | PCSK6    | chr15 | - | -188  | NM_138319    |
| D3A_WT | 1531 | 242452407 | 242452761 | 2.59 | PDCD1    | chr2  | - | -2853 | NM_005018    |
| D3A_WT | 1532 | 242456092 | 242456541 | 2.2  | PDCD1    | chr2  | - | -6585 | NM_005018    |
| D3A_WT | 437  | 72030734  | 72031075  | 2.75 | PDE2A    | chr11 | - | 248   | NM_001143839 |
| D3A_WT | 437  | 72030734  | 72031075  | 2.75 | PDE2A    | chr11 | - | 231   | NR_026572    |
| D3A_WT | 1234 | 10423816  | 10424175  | 2.83 | PDE4A    | chr19 | + | -637  | NM_006202    |
| D3A_WT | 1998 | 59224815  | 59226066  | 2.58 | PDE4D    | chr5  | - | -62   | NM_001104631 |
| D3A_WT | 2007 | 76542067  | 76542841  | 3.28 | PDE8B    | chr5  | + | -7    | NM_001029851 |
| D3A_WT | 781  | 274235    | 276080    | 4.84 | PDIA2    | chr16 | + | 2039  | NM_006849    |
| D3A_WT | 77   | 26310713  | 26311569  | 2.32 | PDIK1L   | chr1  | + | 287   | NM_152835    |
| D3A_WT | 77   | 26310713  | 26311569  | 2.32 | PDIK1L   | chr1  | + | 899   | NR_026685    |
| D3A_WT | 268  | 97040508  | 97040842  | 2.76 | PDLIM1   | chr10 | - | 96    | NM_020992    |
| D3A_WT | 2050 | 176862491 | 176863530 | 3.14 | PDLIM7   | chr5  | - | -5802 | NM_203352    |
| D3A_WT | 881  | 65472430  | 65472779  | 2.65 | PDP2     | chr16 | + | 668   | NM_020786    |
| D3A_WT | 1910 | 39654834  | 39656473  | 3.36 | PDS5A    | chr4  | - | 225   | NM_015200    |
| D3A_WT | 1910 | 39654834  | 39656473  | 3.36 | PDS5A    | chr4  | - | 318   | NM_001100399 |
| D3A_WT | 1808 | 73756184  | 73756503  | 2.14 | PDZRN3   | chr3  | - | 419   | NM_015009    |
| D3A_WT | 652  | 55655379  | 55655613  | 3.52 | PELI2    | chr14 | + | 651   | NM_021255    |
| D3A_WT | 942  | 4560489   | 4561104   | 2.43 | PELP1    | chr17 | - | -6415 | NM_014389    |
| D3A_WT | 941  | 4553888   | 4554507   | 3.33 | PELP1    | chr17 | - | 184   | NM_014389    |

|        |      |           |           |      |         |       |   |       |              |
|--------|------|-----------|-----------|------|---------|-------|---|-------|--------------|
| D3A_WT | 2142 | 138470033 | 138470382 | 2.54 | PERP    | chr6  | - | 146   | NM_022121    |
| D3A_WT | 392  | 45901281  | 45901505  | 2.28 | PEX16   | chr11 | - | -5143 | NM_057174    |
| D3A_WT | 1571 | 52258025  | 52258174  | 2.03 | PFDN4   | chr20 | + | 191   | NM_002623    |
| D3A_WT | 230  | 6285030   | 6285269   | 2.34 | PFKFB3  | chr10 | + | 304   | NM_004566    |
| D3A_WT | 1637 | 44537922  | 44538571  | 3.16 | PFKL    | chr21 | + | -6111 | NM_002626    |
| D3A_WT | 1637 | 44537922  | 44538571  | 3.16 | PFKL    | chr21 | + | -6106 | NR_024108    |
| D3A_WT | 224  | 3099725   | 3099879   | 2.5  | PFKP    | chr10 | + | 51    | NM_002627    |
| D3A_WT | 943  | 4792983   | 4794220   | 2.65 | PFN1    | chr17 | - | -1031 | NM_005022    |
| D3A_WT | 2048 | 176763714 | 176764265 | 3.35 | PFN3    | chr5  | - | -3746 | NM_001029886 |
| D3A_WT | 1402 | 24197385  | 24197704  | 2.68 | PFN4    | chr2  | - | 2111  | NM_199346    |
| D3A_WT | 1403 | 24199570  | 24199939  | 3.47 | PFN4    | chr2  | - | -99   | NM_199346    |
| D3A_WT | 220  | 247167098 | 247167547 | 3.61 | PGBD2   | chr1  | + | 258   | NM_170725    |
| D3A_WT | 2360 | 97726608  | 97726952  | 2.86 | PGCP    | chr8  | + | 106   | NM_016134    |
| D3A_WT | 440  | 73787153  | 73787491  | 2.54 | PGM2L1  | chr11 | - | -172  | NM_173582    |
| D3A_WT | 2161 | 169866542 | 169867058 | 2.93 | PHF10   | chr6  | - | -769  | NM_133325    |
| D3A_WT | 532  | 74711949  | 74712178  | 2.4  | PHLDA1  | chr12 | - | -240  | NM_007350    |
| D3A_WT | 366  | 2906692   | 2907769   | 2.44 | PHLDA2  | chr11 | - | -4    | NM_003311    |
| D3A_WT | 2519 | 138858268 | 138859043 | 2.42 | PHPT1   | chr9  | + | -4421 | NM_014172    |
| D3A_WT | 1499 | 229844159 | 229844493 | 2.66 | PID1    | chr2  | - | -25   | NM_001100818 |
| D3A_WT | 1854 | 197923579 | 197923824 | 3.22 | PIGX    | chr3  | + | 60    | NM_017861    |
| D3A_WT | 1855 | 198180881 | 198181430 | 2.43 | PIGZ    | chr3  | - | -1054 | NM_025163    |
| D3A_WT | 2566 | 48659386  | 48661113  | 2.49 | PIM2    | chrX  | - | 1108  | NM_006875    |
| D3A_WT | 1747 | 48738764  | 48739223  | 3    | PIM3    | chr22 | + | -1153 | NM_001001852 |
| D3A_WT | 945  | 6400816   | 6400950   | 2.04 | PITPNM3 | chr17 | - | -282  | NM_001165966 |
| D3A_WT | 749  | 70309168  | 70310104  | 3.47 | PKM2    | chr15 | - | 1102  | NM_182471    |
| D3A_WT | 831  | 2970307   | 2970551   | 2.08 | PKMYT1  | chr16 | - | 46    | NM_004203    |
| D3A_WT | 70   | 20339830  | 20340564  | 3.21 | PLA2G2F | chr1  | + | 1788  | NM_022819    |
| D3A_WT | 1333 | 53305561  | 53306005  | 2.63 | PLA2G4C | chr19 | - | 138   | NM_001159322 |
| D3A_WT | 1214 | 5518388   | 5518617   | 2.14 | PLAC2   | chr19 | - | 503   | NR_027064    |
| D3A_WT | 2144 | 144371050 | 144371304 | 2.45 | PLAGL1  | chr6  | - | 57    | NM_006718    |
| D3A_WT | 1409 | 28574917  | 28575467  | 2.91 | PLB1    | chr2  | + | 2707  | NM_153021    |
| D3A_WT | 407  | 63775326  | 63776462  | 3.52 | PLCB3   | chr11 | + | 197   | NM_000932    |
| D3A_WT | 2616 | 126960    | 127559    | 3.61 | PLCXD1  | chrY  | + | -5731 | NR_028057    |
| D3A_WT | 2617 | 134674    | 135079    | 2.3  | PLCXD1  | chrY  | + | 1886  | NR_028057    |
| D3A_WT | 2617 | 134674    | 135079    | 2.3  | PLCXD1  | chrY  | + | -3184 | NM_018390    |
| D3A_WT | 1308 | 45546165  | 45546304  | 2.34 | PLD3    | chr19 | + | 63    | NM_012268    |
| D3A_WT | 958  | 17049832  | 17050696  | 2.86 | PLD6    | chr17 | - | 107   | NM_178836    |
| D3A_WT | 507  | 43896142  | 43896301  | 2.73 | PLEKHA9 | chr12 | - | -165  | NM_015899    |
| D3A_WT | 49   | 6472844   | 6473168   | 2.49 | PLEKHG5 | chr1  | - | 221   | NM_001042664 |
| D3A_WT | 49   | 6472844   | 6473168   | 2.49 | PLEKHG5 | chr1  | - | -4405 | NM_001042665 |
| D3A_WT | 49   | 6472844   | 6473168   | 2.49 | PLEKHG5 | chr1  | - | 1341  | NM_020631    |
| D3A_WT | 3    | 892017    | 892266    | 3.05 | PLEKHN1 | chr1  | + | 402   | NM_001160184 |
| D3A_WT | 878  | 55875558  | 55875832  | 2.53 | PLLP    | chr16 | - | 390   | NM_015993    |
| D3A_WT | 1820 | 128185591 | 128186575 | 2.49 | PLXNA1  | chr3  | + | -4043 | NM_032242    |
| D3A_WT | 186  | 206483565 | 206484014 | 2.78 | PLXNA2  | chr1  | - | 499   | NM_025179    |
| D3A_WT | 2114 | 89912495  | 89912954  | 2.89 | PM20D2  | chr6  | + | 237   | NM_001010853 |
| D3A_WT | 2603 | 152591486 | 152592235 | 2.37 | PNCK    | chrX  | - | 1150  | NM_001039582 |

|        |      |           |           |      |          |       |   |       |              |
|--------|------|-----------|-----------|------|----------|-------|---|-------|--------------|
| D3A_WT | 2603 | 152591486 | 152592235 | 2.37 | PNCK     | chrX  | - | 77    | NM_001135740 |
| D3A_WT | 2112 | 89847145  | 89848773  | 2.74 | PNRC1    | chr6  | + | 812   | NM_006813    |
| D3A_WT | 1251 | 13926145  | 13926389  | 2.22 | PODNL1   | chr19 | - | -1063 | NM_001146255 |
| D3A_WT | 2553 | 24621609  | 24621738  | 2.21 | POLA1    | chrX  | + | -303  | NM_016937    |
| D3A_WT | 974  | 23708354  | 23708603  | 2.6  | POLDIP2  | chr17 | - | 252   | NM_015584    |
| D3A_WT | 2331 | 22158097  | 22158446  | 2.39 | POLR3D   | chr8  | + | -292  | NM_001722    |
| D3A_WT | 666  | 76857490  | 76857634  | 2.31 | POMT2    | chr14 | - | -584  | NM_013382    |
| D3A_WT | 2120 | 105731898 | 105732656 | 2.41 | POPDC3   | chr6  | - | 2274  | NM_022361    |
| D3A_WT | 2120 | 105731898 | 105732656 | 2.41 | POPDC3   | chr6  | - | -1454 | NR_024539    |
| D3A_WT | 170  | 165457686 | 165457835 | 2.4  | POU2F1   | chr1  | + | 994   | NM_002697    |
| D3A_WT | 1449 | 104839522 | 104839671 | 2.68 | POU3F3   | chr2  | + | 1196  | NM_006236    |
| D3A_WT | 609  | 78073723  | 78074272  | 2.5  | POU4F1   | chr13 | - | 1699  | NM_006237    |
| D3A_WT | 610  | 78075335  | 78075689  | 2.65 | POU4F1   | chr13 | - | 184   | NM_006237    |
| D3A_WT | 1941 | 147779555 | 147781214 | 3    | POU4F2   | chr4  | + | 890   | NM_004575    |
| D3A_WT | 515  | 49874953  | 49875167  | 2.25 | POU6F1   | chr12 | - | 3157  | NM_002702    |
| D3A_WT | 2221 | 38982141  | 38982385  | 2.34 | POU6F2   | chr7  | + | -1870 | NM_007252    |
| D3A_WT | 1996 | 54866349  | 54866478  | 2.16 | PPAP2A   | chr5  | - | 217   | NM_176895    |
| D3A_WT | 2499 | 133147736 | 133147948 | 2.99 | PPAPDC3  | chr9  | + | -7059 | NM_032728    |
| D3A_WT | 1597 | 61622500  | 61623034  | 2.75 | PPDPF    | chr20 | + | 191   | NM_024299    |
| D3A_WT | 2128 | 109868626 | 109869075 | 3.73 | PPL6     | chr6  | - | -310  | NM_001111298 |
| D3A_WT | 1797 | 52248157  | 52248421  | 2.79 | PPM1M    | chr3  | + | -6975 | NM_144641    |
| D3A_WT | 534  | 78852661  | 78853225  | 2.42 | PPP1R12A | chr12 | - | 423   | NM_001143885 |
| D3A_WT | 534  | 78852661  | 78853225  | 2.42 | PPP1R12A | chr12 | - | 166   | NM_002480    |
| D3A_WT | 694  | 103382989 | 103384028 | 2.59 | PPP1R13B | chr14 | - | 172   | NM_015316    |
| D3A_WT | 407  | 63775326  | 63776462  | 3.52 | PPP1R14B | chr11 | - | -4905 | NM_138689    |
| D3A_WT | 2150 | 150505921 | 150506760 | 2.73 | PPP1R14C | chr6  | + | 460   | NM_030949    |
| D3A_WT | 2324 | 9045594   | 9045734   | 2.82 | PPP1R3B  | chr8  | - | -34   | NM_024607    |
| D3A_WT | 2569 | 49013554  | 49013816  | 2.57 | PPP1R3F  | chrX  | + | 425   | NM_033215    |
| D3A_WT | 1527 | 241737156 | 241737405 | 2.5  | PPP1R7   | chr2  | + | -1294 | NM_002712    |
| D3A_WT | 1014 | 45582206  | 45583456  | 3.18 | PPP1R9B  | chr17 | - | 45    | NM_032595    |
| D3A_WT | 2336 | 30789339  | 30789864  | 2.76 | PPP2CB   | chr8  | - | 293   | NM_001009552 |
| D3A_WT | 2620 | 219120    | 219689    | 3.25 | PPP2R3B  | chrY  | - | 3186  | NM_199326    |
| D3A_WT | 189  | 210526226 | 210526385 | 2.72 | PPP2R5A  | chr1  | + | 804   | NM_006243    |
| D3A_WT | 1928 | 102486185 | 102488658 | 2.73 | PPP3CA   | chr4  | - | 230   | NM_001130692 |
| D3A_WT | 1807 | 73128499  | 73129417  | 2.88 | PPP4R2   | chr3  | + | 150   | NM_174907    |
| D3A_WT | 1136 | 75811959  | 75814106  | 4    | PQLC1    | chr18 | - | -391  | NM_001146345 |
| D3A_WT | 472  | 129320344 | 129320693 | 2.88 | PRDM10   | chr11 | - | 2209  | NM_199439    |
| D3A_WT | 32   | 2977403   | 2977577   | 2.19 | PRDM16   | chr1  | + | 1887  | NM_199454    |
| D3A_WT | 31   | 2974705   | 2975471   | 2.09 | PRDM16   | chr1  | + | -515  | NM_199454    |
| D3A_WT | 62   | 13948894  | 13949650  | 2.13 | PRDM2    | chr1  | + | 810   | NM_001007257 |
| D3A_WT | 1244 | 12778104  | 12778558  | 2.5  | PRDX2    | chr19 | - | -4637 | NM_005809    |
| D3A_WT | 1243 | 12776034  | 12776273  | 2.12 | PRDX2    | chr19 | - | -2459 | NM_005809    |
| D3A_WT | 1600 | 61675884  | 61676033  | 2.35 | PRIC285  | chr20 | - | 78    | NM_001037335 |
| D3A_WT | 1599 | 61666363  | 61671502  | 3.72 | PRIC285  | chr20 | - | 619   | NM_033405    |
| D3A_WT | 1600 | 61675884  | 61676033  | 2.35 | PRIC285  | chr20 | - | -6407 | NM_033405    |
| D3A_WT | 510  | 47700630  | 47700784  | 2.31 | PRKAG1   | chr12 | - | -1848 | NM_002733    |
| D3A_WT | 2174 | 733096    | 733420    | 2.78 | PRKAR1B  | chr7  | - | 246   | NM_001164760 |

|        |      |           |           |      |           |       |   |       |              |
|--------|------|-----------|-----------|------|-----------|-------|---|-------|--------------|
| D3A_WT | 2174 | 733096    | 733420    | 2.78 | PRKAR1B   | chr7  | - | 581   | NM_001164759 |
| D3A_WT | 2269 | 106470491 | 106470827 | 2.22 | PRKAR2B   | chr7  | + | -1754 | NM_002736    |
| D3A_WT | 2270 | 106472380 | 106473250 | 3.03 | PRKAR2B   | chr7  | + | 402   | NM_002736    |
| D3A_WT | 1033 | 61729317  | 61730137  | 2.87 | PRKCA     | chr17 | + | 340   | NM_002737    |
| D3A_WT | 1357 | 59073899  | 59074445  | 2.88 | PRKCG     | chr19 | + | -3106 | NM_002739    |
| D3A_WT | 21   | 1972459   | 1972708   | 2.46 | PRKCZ     | chr1  | + | 815   | NM_002744    |
| D3A_WT | 23   | 1995775   | 1995919   | 2.2  | PRKCZ     | chr1  | + | 902   | NM_001033581 |
| D3A_WT | 22   | 1992263   | 1992602   | 2.82 | PRKCZ     | chr1  | + | -2513 | NM_001033581 |
| D3A_WT | 1340 | 54872756  | 54873109  | 2.62 | PRMT1     | chr19 | + | 625   | NM_198318    |
| D3A_WT | 631  | 112855603 | 112855752 | 2.27 | PROZ      | chr13 | + | -5291 | NM_003891    |
| D3A_WT | 2465 | 115077770 | 115078094 | 2.46 | PRPF4     | chr9  | + | 138   | NM_004697    |
| D3A_WT | 511  | 47975387  | 47975751  | 2.93 | PRPH      | chr12 | + | 394   | NM_006262    |
| D3A_WT | 2156 | 166640663 | 166642040 | 3.88 | PRR18     | chr6  | - | 510   | NM_175922    |
| D3A_WT | 2495 | 131467342 | 131468322 | 2.09 | PRRX2     | chr9  | + | 92    | NM_016307    |
| D3A_WT | 1656 | 15462034  | 15462496  | 2.36 | psiTPTE22 | chr22 | + | -535  | NR_001591    |
| D3A_WT | 1581 | 60151957  | 60152601  | 2.4  | PSMA7     | chr20 | - | -410  | NM_002792    |
| D3A_WT | 2169 | 170703904 | 170704068 | 2.33 | PSMB1     | chr6  | - | 356   | NM_002793    |
| D3A_WT | 986  | 34157422  | 34157977  | 2.6  | PSMB3     | chr17 | + | -4828 | NM_002795    |
| D3A_WT | 641  | 23675039  | 23675358  | 2.45 | PSME1     | chr14 | + | -19   | NM_006263    |
| D3A_WT | 642  | 23686921  | 23687170  | 2.51 | PSME2     | chr14 | - | -1350 | NM_002818    |
| D3A_WT | 2192 | 1575936   | 1576597   | 2.95 | PSMG3     | chr7  | - | -72   | NM_001134340 |
| D3A_WT | 2192 | 1575936   | 1576597   | 2.95 | PSMG3     | chr7  | - | -111  | NM_032302    |
| D3A_WT | 1219 | 6331269   | 6331393   | 2.01 | PSPN      | chr19 | - | -4471 | NM_004158    |
| D3A_WT | 59   | 11461769  | 11462633  | 3.58 | PTCHD2    | chr1  | + | 320   | NM_020780    |
| D3A_WT | 235  | 23520792  | 23522017  | 2.37 | PTF1A     | chr10 | + | -61   | NM_178161    |
| D3A_WT | 745  | 63609886  | 63610125  | 2.64 | PTPLAD1   | chr15 | + | 126   | NM_016395    |
| D3A_WT | 1924 | 87734411  | 87734580  | 2.05 | PTPN13    | chr4  | + | 4     | NM_080684    |
| D3A_WT | 381  | 18768864  | 18770209  | 2.58 | PTPN5     | chr11 | - | 429   | NM_032781    |
| D3A_WT | 85   | 29436762  | 29437211  | 2.43 | PTPRU     | chr1  | + | 1353  | NM_133178    |
| D3A_WT | 2481 | 129517231 | 129517855 | 2.52 | PTRH1     | chr9  | - | 214   | NM_001002913 |
| D3A_WT | 456  | 111602526 | 111602785 | 3.09 | PTS       | chr11 | + | 358   | NM_000317    |
| D3A_WT | 2393 | 144983066 | 144983788 | 2.54 | PUF60     | chr8  | - | 98    | NM_014281    |
| D3A_WT | 2393 | 144983066 | 144983788 | 2.54 | PUF60     | chr8  | - | -243  | NM_001136033 |
| D3A_WT | 13   | 1233219   | 1234854   | 2.63 | PUSL1     | chr1  | + | 180   | NM_153339    |
| D3A_WT | 1704 | 35542664  | 35542943  | 2.3  | PVALB     | chr22 | - | 2660  | NM_002854    |
| D3A_WT | 463  | 119104791 | 119105345 | 2.97 | PVRL1     | chr11 | - | -423  | NM_203285    |
| D3A_WT | 1814 | 112273446 | 112274164 | 3.66 | PVRL3     | chr3  | + | 251   | NM_015480    |
| D3A_WT | 304  | 134059527 | 134059656 | 2.84 | PWWP2B    | chr10 | + | -1100 | NM_001098637 |
| D3A_WT | 1002 | 39437676  | 39438745  | 2.45 | PYY       | chr17 | - | -847  | NM_004160    |
| D3A_WT | 2512 | 138277193 | 138277852 | 2.05 | QSOX2     | chr9  | - | -14   | NM_181701    |
| D3A_WT | 787  | 416524    | 417666    | 2.77 | RAB11FIP3 | chr16 | + | 1427  | NM_014700    |
| D3A_WT | 2286 | 139744671 | 139744950 | 2.36 | RAB19     | chr7  | + | -5501 | NM_001008749 |
| D3A_WT | 159  | 154290347 | 154290889 | 3.26 | RAB25     | chr1  | + | -6971 | NM_020387    |
| D3A_WT | 741  | 53369202  | 53369554  | 3.58 | RAB27A    | chr15 | - | -85   | NM_183235    |
| D3A_WT | 1042 | 70239866  | 70241710  | 3.47 | RAB37     | chr17 | + | -4162 | NM_001163990 |
| D3A_WT | 1042 | 70239866  | 70241710  | 3.47 | RAB37     | chr17 | + | -3765 | NM_001163989 |
| D3A_WT | 1267 | 18177774  | 18177994  | 2.3  | RAB3A     | chr19 | - | -2010 | NM_002866    |

|        |      |           |           |      |          |       |   |       |              |
|--------|------|-----------|-----------|------|----------|-------|---|-------|--------------|
| D3A_WT | 2578 | 69416294  | 69416653  | 2.89 | RAB41    | chrX  | + | -2319 | NM_001032726 |
| D3A_WT | 2549 | 13617364  | 13618314  | 3.11 | RAB9A    | chrX  | + | 578   | NM_004251    |
| D3A_WT | 1082 | 77583742  | 77583981  | 2.11 | RAC3     | chr17 | + | 1041  | NM_005052    |
| D3A_WT | 2462 | 109084699 | 109085437 | 2.08 | RAD23B   | chr9  | + | -296  | NM_002874    |
| D3A_WT | 961  | 17526333  | 17527190  | 2.17 | RAI1     | chr17 | + | 1250  | NM_030665    |
| D3A_WT | 1557 | 32045088  | 32046205  | 2.63 | RALY     | chr20 | + | 254   | NM_007367    |
| D3A_WT | 1666 | 18484698  | 18485527  | 2.43 | RANBP1   | chr22 | + | 89    | NM_002882    |
| D3A_WT | 2039 | 170222202 | 170222351 | 2.22 | RANBP17  | chr5  | + | 677   | NM_022897    |
| D3A_WT | 952  | 8134638   | 8134977   | 3.05 | RANGRF   | chr17 | + | 2094  | NM_016492    |
| D3A_WT | 73   | 21850775  | 21851159  | 2.3  | RAP1GAP  | chr1  | - | -32   | NM_001145658 |
| D3A_WT | 1927 | 99401447  | 99401780  | 2.33 | RAP1GDS1 | chr4  | + | 64    | NM_001100430 |
| D3A_WT | 2111 | 88356351  | 88356496  | 2.07 | RARS2    | chr6  | - | 31    | NM_020320    |
| D3A_WT | 960  | 17339659  | 17340890  | 2.55 | RASD1    | chr17 | - | 158   | NM_016084    |
| D3A_WT | 1703 | 34266119  | 34266779  | 2.98 | RASD2    | chr22 | + | -848  | NM_014310    |
| D3A_WT | 2059 | 179573274 | 179573519 | 3.39 | RASGEF1C | chr5  | - | -4660 | NM_175062    |
| D3A_WT | 2058 | 179568565 | 179569399 | 2.7  | RASGEF1C | chr5  | - | -246  | NM_175062    |
| D3A_WT | 2008 | 80291348  | 80291567  | 3.25 | RASGRF2  | chr5  | + | -856  | NM_006909    |
| D3A_WT | 1792 | 50349967  | 50350291  | 2.32 | RASSF1   | chr3  | - | -230  | NM_170713    |
| D3A_WT | 1792 | 50349967  | 50350291  | 2.32 | RASSF1   | chr3  | - | 3242  | NM_170714    |
| D3A_WT | 1792 | 50349967  | 50350291  | 2.32 | RASSF1   | chr3  | - | 539   | NM_170712    |
| D3A_WT | 325  | 546111    | 546446    | 2.22 | RASSF7   | chr11 | + | -5171 | NM_003475    |
| D3A_WT | 325  | 546111    | 546446    | 2.22 | RASSF7   | chr11 | + | -4692 | NM_001143993 |
| D3A_WT | 2342 | 53789169  | 53789818  | 3.31 | RB1CC1   | chr8  | - | 86    | NM_014781    |
| D3A_WT | 1575 | 55399977  | 55400141  | 2.66 | RBM38    | chr20 | + | 190   | NM_017495    |
| D3A_WT | 1946 | 155922252 | 155922516 | 2.83 | RBM46    | chr4  | + | 508   | NM_144979    |
| D3A_WT | 1474 | 161057771 | 161058030 | 2.84 | RBMS1    | chr2  | - | 664   | NM_016836    |
| D3A_WT | 123  | 89230679  | 89231048  | 3.05 | RBMXL1   | chr1  | - | 368   | NM_019610    |
| D3A_WT | 2593 | 114329929 | 114333498 | 4.62 | RBMXL3   | chrX  | + | 1495  | NM_001145346 |
| D3A_WT | 2634 | 22106264  | 22106587  | 2.97 | RBMY1A1  | chrY  | + | 239   | NM_005058    |
| D3A_WT | 2634 | 22106264  | 22106587  | 2.97 | RBMY1B   | chrY  | + | 239   | NM_001006121 |
| D3A_WT | 2634 | 22106264  | 22106587  | 2.97 | RBMY1D   | chrY  | + | 233   | NM_001006120 |
| D3A_WT | 490  | 7179067   | 7179598   | 2.81 | RBP5     | chr12 | - | -6599 | NM_031491    |
| D3A_WT | 1171 | 1442020   | 1442264   | 2.11 | REEP6    | chr19 | + | -22   | NM_138393    |
| D3A_WT | 26   | 2307369   | 2307712   | 2.55 | RER1     | chr1  | + | -5533 | NM_007033    |
| D3A_WT | 52   | 8406205   | 8406329   | 2.02 | RERE     | chr1  | - | 67    | NM_001042682 |
| D3A_WT | 1434 | 85435254  | 85435608  | 3.01 | RETSAT   | chr2  | - | -99   | NM_017750    |
| D3A_WT | 2355 | 86760623  | 86762926  | 4.25 | REXO1L1  | chr8  | - | 746   | NM_172239    |
| D3A_WT | 2354 | 86753872  | 86755639  | 5.73 | REXO1L2P | chr8  | - | 402   | NR_003594    |
| D3A_WT | 2355 | 86760623  | 86762926  | 4.25 | REXO1L2P | chr8  | - | -6617 | NR_003594    |
| D3A_WT | 2355 | 86760623  | 86762926  | 4.25 | REXO1L2P | chr8  | - | 220   | NR_003594    |
| D3A_WT | 555  | 116939023 | 116939272 | 2.87 | RFC5     | chr12 | + | 257   | NM_007370    |
| D3A_WT | 171  | 174442583 | 174443417 | 2.8  | RFWD2    | chr1  | - | -7    | NM_001001740 |
| D3A_WT | 1446 | 101456913 | 101457972 | 2.65 | RFX8     | chr2  | - | 155   | NM_001145664 |
| D3A_WT | 773  | 91432867  | 91433720  | 2.27 | RGMA     | chr15 | - | -537  | NM_001166287 |
| D3A_WT | 773  | 91432867  | 91433720  | 2.27 | RGMA     | chr15 | - | 154   | NM_020211    |
| D3A_WT | 794  | 662497    | 663146    | 3.17 | RHBDL1   | chr16 | + | -3254 | NM_003961    |
| D3A_WT | 425  | 66580802  | 66581566  | 2.67 | RHOD     | chr11 | + | 320   | NM_014578    |

|        |      |           |           |      |          |       |   |       |              |
|--------|------|-----------|-----------|------|----------|-------|---|-------|--------------|
| D3A_WT | 793  | 651289    | 654618    | 3.95 | RHOT2    | chr16 | + | -5180 | NM_138769    |
| D3A_WT | 204  | 226938323 | 226938943 | 3.54 | RHOU     | chr1  | + | 1142  | NM_021205    |
| D3A_WT | 319  | 198794    | 199743    | 4.08 | RIC8A    | chr11 | + | 739   | NM_021932    |
| D3A_WT | 564  | 122583741 | 122583900 | 2.43 | RILPL1   | chr12 | - | 398   | NM_178314    |
| D3A_WT | 1679 | 20234069  | 20234998  | 4.07 | RIMBP3B  | chr22 | - | 840   | NM_001128635 |
| D3A_WT | 1679 | 20234069  | 20234998  | 4.07 | RIMBP3C  | chr22 | - | 1217  | NM_001128633 |
| D3A_WT | 492  | 8742065   | 8742204   | 2.46 | RIMKLB   | chr12 | + | 350   | NM_020734    |
| D3A_WT | 423  | 65866199  | 65866328  | 2.53 | RIN1     | chr11 | - | -5687 | NM_004292    |
| D3A_WT | 2107 | 84619835  | 84620264  | 3.25 | RIPPLY2  | chr6  | + | 346   | NM_001009994 |
| D3A_WT | 1244 | 12778104  | 12778558  | 2.5  | RNASEH2A | chr19 | + | -96   | NM_006397    |
| D3A_WT | 1243 | 12776034  | 12776273  | 2.12 | RNASEH2A | chr19 | + | -2274 | NM_006397    |
| D3A_WT | 417  | 65244690  | 65244814  | 2.03 | RNASEH2C | chr11 | - | 233   | NM_032193    |
| D3A_WT | 946  | 6859288   | 6859557   | 2.25 | RNASEK   | chr17 | + | 2901  | NM_001004333 |
| D3A_WT | 2159 | 167290701 | 167290845 | 2.01 | RNASET2  | chr6  | - | -706  | NM_003730    |
| D3A_WT | 1789 | 49699702  | 49699851  | 2.06 | RNF123   | chr3  | + | -2217 | NM_022064    |
| D3A_WT | 1147 | 617819    | 618148    | 2.04 | RNF126   | chr19 | - | -3756 | NM_194460    |
| D3A_WT | 977  | 26322212  | 26322461  | 2.59 | RNF135   | chr17 | + | 255   | NM_032322    |
| D3A_WT | 1996 | 54866349  | 54866478  | 2.16 | RNF138P1 | chr5  | - | -286  | NR_001575    |
| D3A_WT | 2135 | 127629723 | 127630269 | 3.28 | RNF146   | chr6  | + | 284   | NM_030963    |
| D3A_WT | 1938 | 142273161 | 142273300 | 2.2  | RNF150   | chr4  | - | 836   | NM_020724    |
| D3A_WT | 916  | 87300544  | 87300673  | 2.46 | RNF166   | chr16 | - | -307  | NM_178841    |
| D3A_WT | 2339 | 42871290  | 42872440  | 3.63 | RNF170   | chr8  | - | -842  | NM_001160224 |
| D3A_WT | 642  | 23686921  | 23687170  | 2.51 | RNF31    | chr14 | + | 547   | NM_017999    |
| D3A_WT | 2044 | 175894047 | 175894176 | 2.69 | RNF44    | chr5  | - | 2916  | NM_014901    |
| D3A_WT | 553  | 115660021 | 115660485 | 2.51 | RNFT2    | chr12 | + | -225  | NM_032814    |
| D3A_WT | 821  | 2257723   | 2258562   | 2.36 | RNPS1    | chr16 | - | -27   | NM_080594    |
| D3A_WT | 821  | 2257723   | 2258562   | 2.36 | RNPS1    | chr16 | - | -344  | NM_006711    |
| D3A_WT | 159  | 154290347 | 154290889 | 3.26 | ROBLD3   | chr1  | + | -522  | NM_001145264 |
| D3A_WT | 151  | 150077298 | 150077737 | 2.87 | RORC     | chr1  | - | -6545 | NM_005060    |
| D3A_WT | 2326 | 10555152  | 10555297  | 2.09 | RP1L1    | chr8  | - | -5197 | NM_178857    |
| D3A_WT | 2220 | 33115429  | 33115693  | 2.32 | RP9      | chr7  | - | -34   | NM_203288    |
| D3A_WT | 931  | 205209    | 205458    | 2.82 | RPH3AL   | chr17 | - | -2757 | NM_006987    |
| D3A_WT | 1216 | 5638732   | 5638896   | 2.43 | RPL36    | chr19 | + | -2457 | NM_033643    |
| D3A_WT | 1216 | 5638732   | 5638896   | 2.43 | RPL36    | chr19 | + | -2531 | NM_015414    |
| D3A_WT | 2407 | 145994800 | 145995319 | 2.4  | RPL8     | chr8  | - | -6526 | NM_033301    |
| D3A_WT | 2407 | 145994800 | 145995319 | 2.4  | RPL8     | chr8  | - | -6450 | NM_000973    |
| D3A_WT | 1007 | 42411119  | 42411458  | 2.52 | RPRML    | chr17 | - | 325   | NM_203400    |
| D3A_WT | 1168 | 1382757   | 1384504   | 3.58 | RPS15    | chr19 | + | -5732 | NM_001018    |
| D3A_WT | 2157 | 166960436 | 166960665 | 2.29 | RPS6KA2  | chr6  | - | 166   | NM_021135    |
| D3A_WT | 798  | 778442    | 779106    | 3.44 | RPUSD1   | chr16 | - | -390  | NM_058192    |
| D3A_WT | 799  | 780852    | 783152    | 2.87 | RPUSD1   | chr16 | - | -3618 | NM_058192    |
| D3A_WT | 99   | 39097742  | 39097881  | 2.16 | RRAGC    | chr1  | - | 116   | NM_022157    |
| D3A_WT | 371  | 4072206   | 4072463   | 2.42 | RRM1     | chr11 | + | -165  | NM_001033    |
| D3A_WT | 1017 | 45911157  | 45911386  | 2.09 | RSAD1    | chr17 | + | 83    | NM_018346    |
| D3A_WT | 686  | 100418281 | 100418530 | 2.69 | RTL1     | chr14 | - | 2532  | NM_001134888 |
| D3A_WT | 1325 | 50693125  | 50694289  | 2.67 | RTN2     | chr19 | - | -1554 | NM_206900    |
| D3A_WT | 1325 | 50693125  | 50694289  | 2.67 | RTN2     | chr19 | - | -5393 | NM_206901    |

|        |      |           |           |      |          |       |   |       |              |
|--------|------|-----------|-----------|------|----------|-------|---|-------|--------------|
| D3A_WT | 1325 | 50693125  | 50694289  | 2.67 | RTN2     | chr19 | - | -1556 | NM_005619    |
| D3A_WT | 1671 | 18635996  | 18636310  | 2.71 | RTN4R    | chr22 | - | -337  | NM_023004    |
| D3A_WT | 1827 | 135452107 | 135452246 | 2.41 | RYK      | chr3  | - | 100   | NM_002958    |
| D3A_WT | 1215 | 5573466   | 5574815   | 3.12 | SAFB     | chr19 | + | -23   | NM_002967    |
| D3A_WT | 1215 | 5573466   | 5574815   | 3.12 | SAFB2    | chr19 | - | -202  | NM_014649    |
| D3A_WT | 1252 | 14061592  | 14062338  | 3.3  | SAMD1    | chr19 | - | 267   | NM_138352    |
| D3A_WT | 1304 | 44524767  | 44525318  | 2.4  | SAMD4B   | chr19 | + | 95    | NM_018028    |
| D3A_WT | 1727 | 42678960  | 42679389  | 2.13 | SAMM50   | chr22 | + | -3419 | NM_015380    |
| D3A_WT | 1463 | 128501272 | 128501686 | 2.77 | SAP130   | chr2  | - | -140  | NM_024545    |
| D3A_WT | 1366 | 60462119  | 60462493  | 2.27 | SAPS1    | chr19 | - | -456  | NM_014931    |
| D3A_WT | 249  | 71600089  | 71600413  | 2.52 | SAR1A    | chr10 | - | 40    | NM_020150    |
| D3A_WT | 547  | 107482098 | 107482251 | 2    | SART3    | chr12 | - | -2879 | NM_014706    |
| D3A_WT | 1767 | 18441479  | 18442619  | 3.43 | SATB1    | chr3  | - | -216  | NM_002971    |
| D3A_WT | 1751 | 49259611  | 49260562  | 2.52 | SBF1     | chr22 | - | 244   | NM_002972    |
| D3A_WT | 991  | 37228239  | 37228463  | 2.31 | SC65     | chr17 | - | -6374 | NM_006455    |
| D3A_WT | 754  | 72957598  | 72958074  | 3.06 | SCAMP2   | chr15 | - | -5113 | NM_005697    |
| D3A_WT | 1178 | 1858670   | 1858819   | 2.72 | SCAMP4   | chr19 | + | 2372  | NM_079834    |
| D3A_WT | 2082 | 28663814  | 28664367  | 2.98 | SCAND3   | chr6  | - | -999  | NM_052923    |
| D3A_WT | 1783 | 47492365  | 47492529  | 2.47 | SCAP     | chr3  | - | 2     | NM_012235    |
| D3A_WT | 2550 | 20069852  | 20070224  | 3.49 | SCARNA9L | chrX  | - | -5586 | NR_023358    |
| D3A_WT | 218  | 244954229 | 244954558 | 2.81 | SCCPDH   | chr1  | + | 393   | NM_016002    |
| D3A_WT | 2064 | 179954297 | 179954914 | 3.16 | SCGB3A1  | chr5  | - | -3512 | NM_052863    |
| D3A_WT | 1289 | 39780656  | 39780805  | 2.58 | SCGBL    | chr19 | - | -3400 | NM_001025591 |
| D3A_WT | 12   | 1209593   | 1210457   | 4.34 | SCNN1D   | chr1  | + | 2587  | NM_002978    |
| D3A_WT | 12   | 1209593   | 1210457   | 4.34 | SCNN1D   | chr1  | + | 2674  | NM_001130413 |
| D3A_WT | 1753 | 49310843  | 49311477  | 3.22 | SCO2     | chr22 | - | -260  | NM_005138    |
| D3A_WT | 1937 | 141484478 | 141484814 | 2.36 | SCOC     | chr4  | + | 582   | NM_001153690 |
| D3A_WT | 1937 | 141484478 | 141484814 | 2.36 | SCOC     | chr4  | + | 600   | NM_001153635 |
| D3A_WT | 2392 | 144975136 | 144977685 | 2.85 | SCRIB    | chr8  | - | -6873 | NM_015356    |
| D3A_WT | 326  | 618385    | 618804    | 3.37 | SCT      | chr11 | - | -1421 | NM_021920    |
| D3A_WT | 1723 | 42067840  | 42068802  | 2.53 | SCUBE1   | chr22 | - | 978   | NM_173050    |
| D3A_WT | 1918 | 77130969  | 77131143  | 2.15 | SDAD1    | chr4  | - | 81    | NM_018115    |
| D3A_WT | 10   | 1162629   | 1164255   | 2.21 | SDF4     | chr1  | - | -6132 | NM_016176    |
| D3A_WT | 404  | 60954055  | 60954419  | 2.65 | SDHAF2   | chr11 | + | 65    | NM_017841    |
| D3A_WT | 1040 | 69152450  | 69152684  | 3.15 | SDK2     | chr17 | - | -745  | NM_001144952 |
| D3A_WT | 1123 | 54958335  | 54958579  | 2.02 | SEC11C   | chr18 | + | 353   | NM_033280    |
| D3A_WT | 1694 | 29195958  | 29196107  | 2.75 | SEC14L3  | chr22 | - | 2002  | NM_174975    |
| D3A_WT | 2515 | 138497330 | 138497983 | 3.11 | SEC16A   | chr9  | - | -328  | NM_014866    |
| D3A_WT | 1838 | 171167492 | 171167756 | 2.94 | SEC62    | chr3  | + | 351   | NM_003262    |
| D3A_WT | 2124 | 108385531 | 108385680 | 3.38 | SEC63    | chr6  | - | 570   | NM_007214    |
| D3A_WT | 2444 | 91115466  | 91116491  | 4.36 | SECISBP2 | chr9  | + | -7253 | NM_024077    |
| D3A_WT | 1548 | 13923870  | 13924144  | 2.26 | SEL1L2   | chr20 | - | -4745 | NM_025229    |
| D3A_WT | 1696 | 29833321  | 29833770  | 2.79 | SELM     | chr22 | - | 6     | NM_080430    |
| D3A_WT | 1791 | 50272433  | 50273080  | 3.28 | SEMA3B   | chr3  | + | -7287 | NM_004636    |
| D3A_WT | 275  | 102719542 | 102719716 | 2.32 | SEMA4G   | chr10 | + | -2646 | NM_017893    |
| D3A_WT | 1209 | 4507236   | 4507655   | 2.87 | SEMA6B   | chr19 | - | 2058  | NM_032108    |
| D3A_WT | 1847 | 186786549 | 186787306 | 2.65 | SEN2     | chr3  | + | 203   | NM_021627    |

|        |      |           |           |      |           |       |   |       |              |
|--------|------|-----------|-----------|------|-----------|-------|---|-------|--------------|
| D3A_WT | 1833 | 151746656 | 151747175 | 3.41 | SERP1     | chr3  | - | 203   | NM_014445    |
| D3A_WT | 677  | 94055334  | 94056103  | 3.72 | SERPINA12 | chr14 | - | -1784 | NM_173850    |
| D3A_WT | 84   | 28458693  | 28459467  | 2.79 | SES2      | chr1  | + | 488   | NM_031459    |
| D3A_WT | 1781 | 47179907  | 47180771  | 3.35 | SETD2     | chr3  | - | 132   | NM_014159    |
| D3A_WT | 2113 | 89883987  | 89884612  | 2.75 | SFRS13B   | chr6  | - | 220   | NM_080743    |
| D3A_WT | 1619 | 32026416  | 32026550  | 2.3  | SFRS15    | chr21 | - | -181  | NM_001145444 |
| D3A_WT | 1053 | 72244201  | 72244435  | 2.1  | SFRS2     | chr17 | - | 689   | NM_003016    |
| D3A_WT | 648  | 36052191  | 36052355  | 2.3  | SFTA3     | chr14 | - | 468   | NM_001101341 |
| D3A_WT | 278  | 104464000 | 104464149 | 2.29 | SFXN2     | chr10 | + | -213  | NM_178858    |
| D3A_WT | 1430 | 73152404  | 73152943  | 2.58 | SFXN5     | chr2  | - | -200  | NM_144579    |
| D3A_WT | 1835 | 155321889 | 155322045 | 2.63 | SGEF      | chr3  | + | 129   | NM_015595    |
| D3A_WT | 2139 | 134537805 | 134537949 | 2.34 | SGK1      | chr6  | - | -150  | NM_005627    |
| D3A_WT | 2139 | 134537805 | 134537949 | 2.34 | SGK1      | chr6  | - | 886   | NM_001143678 |
| D3A_WT | 2139 | 134537805 | 134537949 | 2.34 | SGK1      | chr6  | - | 2826  | NM_001143677 |
| D3A_WT | 245  | 52052546  | 52053126  | 2.48 | SGMS1     | chr10 | - | 907   | NM_147156    |
| D3A_WT | 1929 | 108965400 | 108966029 | 2.43 | SGMS2     | chr4  | + | 545   | NM_001136258 |
| D3A_WT | 1063 | 75809146  | 75809599  | 2.93 | SGSH      | chr17 | - | -578  | NM_000199    |
| D3A_WT | 1688 | 23532154  | 23532437  | 2.46 | SGSM1     | chr22 | + | 160   | NM_001098498 |
| D3A_WT | 551  | 110328069 | 110328490 | 3.3  | SH2B3     | chr12 | + | 145   | NM_005475    |
| D3A_WT | 261  | 82285666  | 82286005  | 2.15 | SH2D4B    | chr10 | + | -4719 | NM_001145719 |
| D3A_WT | 261  | 82285666  | 82286005  | 2.15 | SH2D4B    | chr10 | + | -1802 | NM_207372    |
| D3A_WT | 1766 | 15355191  | 15355920  | 2.62 | SH3BP5    | chr3  | - | 2350  | NM_001018009 |
| D3A_WT | 1766 | 15355191  | 15355920  | 2.62 | SH3BP5    | chr3  | - | -6447 | NM_004844    |
| D3A_WT | 1755 | 49459528  | 49460154  | 2.08 | SHANK3    | chr22 | + | -94   | NM_001080420 |
| D3A_WT | 2399 | 145237592 | 145238931 | 2.98 | SHARPIN   | chr8  | - | -7133 | NM_030974    |
| D3A_WT | 2398 | 145235287 | 145235736 | 2.21 | SHARPIN   | chr8  | - | -4383 | NM_030974    |
| D3A_WT | 2424 | 38058043  | 38058187  | 2.35 | SHB       | chr9  | - | 1095  | NM_003028    |
| D3A_WT | 2425 | 38063218  | 38063473  | 2.32 | SHB       | chr9  | - | -4135 | NM_003028    |
| D3A_WT | 1138 | 414832    | 415292    | 2.64 | SHC2      | chr19 | - | -3066 | NM_012435    |
| D3A_WT | 1784 | 48516589  | 48517048  | 2.63 | SHISA5    | chr3  | - | -153  | NM_016479    |
| D3A_WT | 2023 | 132189429 | 132189673 | 2.26 | SHROOM1   | chr5  | - | 350   | NM_133456    |
| D3A_WT | 1834 | 151962468 | 151964108 | 2.79 | SIAH2     | chr3  | - | 665   | NM_005067    |
| D3A_WT | 1633 | 43671296  | 43672013  | 2.51 | SIK1      | chr21 | - | -224  | NM_173354    |
| D3A_WT | 1626 | 36987882  | 36988431  | 2.76 | SIM2      | chr21 | + | -5704 | NM_005069    |
| D3A_WT | 654  | 60183710  | 60184174  | 3.2  | SIX1      | chr14 | - | 1966  | NM_005982    |
| D3A_WT | 1417 | 45089642  | 45089776  | 2.67 | SIX2      | chr2  | - | 337   | NM_016932    |
| D3A_WT | 584  | 20649101  | 20649355  | 2.65 | SKA3      | chr13 | - | -487  | NM_001166017 |
| D3A_WT | 1976 | 1164738   | 1165286   | 2.58 | SLC12A7   | chr5  | - | 160   | NM_006598    |
| D3A_WT | 402  | 60475195  | 60476146  | 2.51 | SLC15A3   | chr11 | - | 163   | NM_016582    |
| D3A_WT | 137  | 110740519 | 110740782 | 2.36 | SLC16A4   | chr1  | - | -5491 | NM_004696    |
| D3A_WT | 1710 | 36807010  | 36807254  | 2.67 | SLC16A8   | chr22 | - | 1984  | NM_013356    |
| D3A_WT | 1590 | 61048617  | 61048789  | 2.03 | SLC17A9   | chr20 | + | -5740 | NM_022082    |
| D3A_WT | 384  | 35397495  | 35397724  | 3.42 | SLC1A2    | chr11 | - | 72    | NM_004171    |
| D3A_WT | 1424 | 65069470  | 65070619  | 3.43 | SLC1A4    | chr2  | + | 85    | NM_003038    |
| D3A_WT | 1424 | 65069470  | 65070619  | 3.43 | SLC1A4    | chr2  | + | 962   | NM_001135581 |
| D3A_WT | 1256 | 14951359  | 14951913  | 2.69 | SLC1A6    | chr19 | - | -6906 | NM_005071    |
| D3A_WT | 1255 | 14943855  | 14944119  | 2.24 | SLC1A6    | chr19 | - | 743   | NM_005071    |



|        |      |           |           |      |          |       |   |       |              |
|--------|------|-----------|-----------|------|----------|-------|---|-------|--------------|
| D3A_WT | 117  | 53384500  | 53384843  | 2.18 | SLC1A7   | chr1  | - | -3794 | NM_006671    |
| D3A_WT | 411  | 64077321  | 64077465  | 2.24 | SLC22A11 | chr11 | + | -2280 | NM_018484    |
| D3A_WT | 414  | 64108089  | 64108358  | 2.82 | SLC22A12 | chr11 | + | -6634 | NM_144585    |
| D3A_WT | 2154 | 160689442 | 160689791 | 2.47 | SLC22A3  | chr6  | + | 202   | NM_021977    |
| D3A_WT | 2025 | 138743880 | 138744449 | 3.19 | SLC23A1  | chr5  | - | 2774  | NM_152685    |
| D3A_WT | 1550 | 19140893  | 19142666  | 3.21 | SLC24A3  | chr20 | + | 490   | NM_020689    |
| D3A_WT | 674  | 91859511  | 91860240  | 2.88 | SLC24A4  | chr14 | + | 1198  | NM_153648    |
| D3A_WT | 674  | 91859511  | 91860240  | 2.88 | SLC24A4  | chr14 | + | -79   | NM_153647    |
| D3A_WT | 1077 | 77289622  | 77289761  | 2.46 | SLC25A10 | chr17 | + | -84   | NM_012140    |
| D3A_WT | 1078 | 77291991  | 77292370  | 3.94 | SLC25A10 | chr17 | + | 2405  | NM_012140    |
| D3A_WT | 1220 | 6415665   | 6415804   | 2.03 | SLC25A23 | chr19 | - | -4953 | NM_024103    |
| D3A_WT | 130  | 108544289 | 108544563 | 2.9  | SLC25A24 | chr1  | - | 71    | NM_013386    |
| D3A_WT | 1828 | 142143991 | 142144130 | 2.95 | SLC25A36 | chr3  | + | 709   | NM_018155    |
| D3A_WT | 2334 | 23442446  | 23442675  | 2.92 | SLC25A37 | chr8  | + | 253   | NM_016612    |
| D3A_WT | 2537 | 1474896   | 1475440   | 2.87 | SLC25A6  | chrX  | - | -4129 | NM_001636    |
| D3A_WT | 2536 | 1470798   | 1471512   | 3.16 | SLC25A6  | chrX  | - | -116  | NM_001636    |
| D3A_WT | 1063 | 75809146  | 75809599  | 2.93 | SLC26A11 | chr17 | + | 578   | NM_001166349 |
| D3A_WT | 2035 | 149320567 | 149321532 | 3.31 | SLC26A2  | chr5  | + | 557   | NM_000112    |
| D3A_WT | 1263 | 17442447  | 17442906  | 3.27 | SLC27A1  | chr19 | + | 377   | NM_198580    |
| D3A_WT | 2484 | 130142660 | 130142909 | 3.07 | SLC27A4  | chr9  | + | 124   | NM_005094    |
| D3A_WT | 424  | 65895689  | 65895838  | 2.22 | SLC29A2  | chr11 | - | 104   | NM_001532    |
| D3A_WT | 1603 | 61834153  | 61834408  | 3.47 | SLC2A4RG | chr20 | + | -7374 | NM_020062    |
| D3A_WT | 2480 | 129199508 | 129199963 | 2.18 | SLC2A8   | chr9  | + | 450   | NM_014580    |
| D3A_WT | 192  | 218167960 | 218168514 | 3.39 | SLC30A10 | chr1  | - | 379   | NM_018713    |
| D3A_WT | 2566 | 48659386  | 48661113  | 2.49 | SLC35A2  | chrX  | - | -6070 | NM_001042498 |
| D3A_WT | 2566 | 48659386  | 48661113  | 2.49 | SLC35A2  | chrX  | - | -6372 | NM_001032289 |
| D3A_WT | 2566 | 48659386  | 48661113  | 2.49 | SLC35A2  | chrX  | - | -6388 | NM_005660    |
| D3A_WT | 391  | 45782585  | 45782849  | 2.88 | SLC35C1  | chr11 | + | 519   | NM_001145266 |
| D3A_WT | 391  | 45782585  | 45782849  | 2.88 | SLC35C1  | chr11 | + | -499  | NM_018389    |
| D3A_WT | 1259 | 16543955  | 16545202  | 2.67 | SLC35E1  | chr19 | - | -385  | NM_024881    |
| D3A_WT | 448  | 92570447  | 92570611  | 2.06 | SLC36A4  | chr11 | - | 214   | NM_152313    |
| D3A_WT | 2286 | 139744671 | 139744950 | 2.36 | SLC37A3  | chr7  | - | -30   | NM_032295    |
| D3A_WT | 1070 | 76889128  | 76889507  | 2.5  | SLC38A10 | chr17 | - | -5626 | NM_001037984 |
| D3A_WT | 2403 | 145609915 | 145611495 | 4.45 | SLC39A4  | chr8  | - | 2020  | NM_017767    |
| D3A_WT | 2403 | 145609915 | 145611495 | 4.45 | SLC39A4  | chr8  | - | 2376  | NM_130849    |
| D3A_WT | 1991 | 34021436  | 34021993  | 2.68 | SLC45A2  | chr5  | - | -1177 | NM_016180    |
| D3A_WT | 863  | 31404461  | 31404780  | 2.1  | SLC5A2   | chr16 | + | 2681  | NM_003041    |
| D3A_WT | 136  | 110494946 | 110495090 | 2.76 | SLC6A17  | chr1  | + | 364   | NM_001010898 |
| D3A_WT | 890  | 66856168  | 66856297  | 2.39 | SLC7A6   | chr16 | + | 309   | NM_003983    |
| D3A_WT | 1969 | 583933    | 584380    | 2.57 | SLC9A3   | chr5  | - | -6607 | NM_004174    |
| D3A_WT | 817  | 2016852   | 2017501   | 2.69 | SLC9A3R2 | chr16 | + | 288   | NM_004785    |
| D3A_WT | 884  | 65840033  | 65840781  | 2.35 | SLC9A5   | chr16 | + | 52    | NM_004594    |
| D3A_WT | 611  | 83351431  | 83351995  | 3.09 | SLITRK1  | chr13 | - | 2816  | NM_052910    |
| D3A_WT | 283  | 105714690 | 105714825 | 2.92 | SLK      | chr10 | + | -2702 | NM_014720    |
| D3A_WT | 1939 | 146622420 | 146622549 | 2.31 | SMAD1    | chr4  | + | 84    | NM_005900    |
| D3A_WT | 1939 | 146622420 | 146622549 | 2.31 | SMAD1    | chr4  | + | -922  | NM_001003688 |
| D3A_WT | 1116 | 43711158  | 43711502  | 2.97 | SMAD2    | chr18 | - | 183   | NM_001135937 |

|        |      |           |           |      |          |       |   |       |              |
|--------|------|-----------|-----------|------|----------|-------|---|-------|--------------|
| D3A_WT | 1116 | 43711158  | 43711502  | 2.97 | SMAD2    | chr18 | - | 180   | NM_001003652 |
| D3A_WT | 1116 | 43711158  | 43711502  | 2.97 | SMAD2    | chr18 | - | -406  | NM_005901    |
| D3A_WT | 746  | 64782739  | 64783008  | 2.27 | SMAD6    | chr15 | + | -5110 | NM_001142861 |
| D3A_WT | 746  | 64782739  | 64783008  | 2.27 | SMAD6    | chr15 | + | 1146  | NM_005585    |
| D3A_WT | 2298 | 150604248 | 150605413 | 2.48 | SMARCD3  | chr7  | - | -77   | NM_001003802 |
| D3A_WT | 2298 | 150604248 | 150605413 | 2.48 | SMARCD3  | chr7  | - | 334   | NM_003078    |
| D3A_WT | 2436 | 72063549  | 72063868  | 2.68 | SMC5     | chr9  | + | 11    | NM_015110    |
| D3A_WT | 1400 | 17798244  | 17798918  | 2.66 | SMC6     | chr2  | - | -4    | NM_024624    |
| D3A_WT | 1712 | 38228351  | 38228500  | 2.01 | SMCR7L   | chr22 | + | 196   | NM_019008    |
| D3A_WT | 672  | 91046457  | 91046901  | 2.66 | SMEK1    | chr14 | - | -282  | NM_032560    |
| D3A_WT | 2128 | 109868626 | 109869075 | 3.73 | SMPD2    | chr6  | + | 227   | NM_003080    |
| D3A_WT | 1566 | 48032841  | 48033090  | 2.88 | SNAI1    | chr20 | + | 32    | NM_005985    |
| D3A_WT | 2045 | 175989985 | 175990249 | 2.78 | SNCB     | chr5  | - | 46    | NM_003085    |
| D3A_WT | 985  | 34014924  | 34015083  | 2.38 | SNIP     | chr17 | - | 706   | NM_025248    |
| D3A_WT | 844  | 11669646  | 11670671  | 2.22 | SNN      | chr16 | + | 357   | NM_003498    |
| D3A_WT | 2571 | 51826615  | 51829005  | 4.15 | SNORA11D | chrX  | - | -4501 | NR_003711    |
| D3A_WT | 274  | 101984444 | 101984605 | 2.35 | SNORA12  | chr10 | - | 2525  | NR_002954    |
| D3A_WT | 692  | 102869978 | 102871320 | 2.37 | SNORA28  | chr14 | + | -3289 | NR_002964    |
| D3A_WT | 2614 | 153644318 | 153644462 | 2.83 | SNORA36A | chrX  | + | -5606 | NR_002969    |
| D3A_WT | 2006 | 76408843  | 76409312  | 2.53 | SNORA47  | chr5  | - | 3075  | NR_003014    |
| D3A_WT | 2228 | 44992585  | 44993144  | 4.34 | SNORA9   | chr7  | - | -1230 | NR_002952    |
| D3A_WT | 1338 | 54280511  | 54280931  | 2.98 | SNRNP70  | chr19 | + | 445   | NM_003089    |
| D3A_WT | 777  | 99652633  | 99652782  | 3.34 | SNRPA1   | chr15 | - | 276   | NM_003090    |
| D3A_WT | 2367 | 121892183 | 121893104 | 3.08 | SNTB1    | chr8  | - | 847   | NM_021021    |
| D3A_WT | 2109 | 86360200  | 86360429  | 2.36 | SNX14    | chr6  | - | 34    | NM_020468    |
| D3A_WT | 1955 | 186361897 | 186362550 | 3.33 | SNX25    | chr4  | + | -6054 | NM_031953    |
| D3A_WT | 2126 | 108688723 | 108689067 | 3.16 | SNX3     | chr6  | - | 262   | NM_152827    |
| D3A_WT | 419  | 65358514  | 65358768  | 2.46 | SNX32    | chr11 | + | 656   | NM_152760    |
| D3A_WT | 2122 | 107918387 | 107919441 | 2.78 | SOBP     | chr6  | + | 905   | NM_018013    |
| D3A_WT | 538  | 92487959  | 92488678  | 3.3  | SOCS2    | chr12 | + | 590   | NM_003877    |
| D3A_WT | 539  | 92489830  | 92490089  | 2.39 | SOCS2    | chr12 | + | 2231  | NM_003877    |
| D3A_WT | 1618 | 31954130  | 31954454  | 3.67 | SOD1     | chr21 | + | 487   | NM_000454    |
| D3A_WT | 1902 | 24406673  | 24407110  | 2.55 | SOD3     | chr4  | + | 709   | NM_003102    |
| D3A_WT | 2332 | 22464826  | 22464970  | 2.97 | SORBS3   | chr8  | + | -297  | NM_005775    |
| D3A_WT | 624  | 111770444 | 111770873 | 2.77 | SOX1     | chr13 | + | 745   | NM_005986    |
| D3A_WT | 2343 | 55532850  | 55533502  | 2.92 | SOX17    | chr8  | + | 129   | NM_022454    |
| D3A_WT | 1841 | 182913242 | 182913496 | 2.46 | SOX2     | chr3  | + | 954   | NM_003106    |
| D3A_WT | 2597 | 139413794 | 139414573 | 2.59 | SOX3     | chrX  | - | 708   | NM_005634    |
| D3A_WT | 2078 | 21703783  | 21704127  | 3.3  | SOX4     | chr6  | + | 2005  | NM_003107    |
| D3A_WT | 2327 | 10628125  | 10628369  | 3.22 | SOX7     | chr8  | - | -2815 | NM_031439    |
| D3A_WT | 805  | 971920    | 972870    | 3.55 | SOX8     | chr16 | + | 587   | NM_014587    |
| D3A_WT | 1038 | 67629381  | 67629535  | 2.25 | SOX9     | chr17 | + | 703   | NM_000346    |
| D3A_WT | 521  | 52060172  | 52060395  | 2.66 | SP1      | chr12 | + | 38    | NM_138473    |
| D3A_WT | 521  | 52060172  | 52060395  | 2.66 | SP1      | chr12 | + | -411  | NM_003109    |
| D3A_WT | 2210 | 20790761  | 20790910  | 2.56 | SP8      | chr7  | - | 2198  | NM_182700    |
| D3A_WT | 2211 | 20791531  | 20792101  | 2.82 | SP8      | chr7  | - | 1217  | NM_182700    |
| D3A_WT | 1481 | 174907650 | 174909892 | 2.72 | SP9      | chr2  | + | 705   | NM_001145250 |

|        |      |           |           |      |            |       |   |       |              |
|--------|------|-----------|-----------|------|------------|-------|---|-------|--------------|
| D3A_WT | 979  | 28342328  | 28342472  | 2.49 | SPACA3     | chr17 | + | -594  | NM_173847    |
| D3A_WT | 191  | 215870797 | 215870946 | 2.05 | SPATA17    | chr1  | + | -446  | NM_138796    |
| D3A_WT | 66   | 16639978  | 16640137  | 2.14 | SPATA21    | chr1  | - | -3551 | NM_198546    |
| D3A_WT | 737  | 43482664  | 43483123  | 2.87 | SPATA5L1   | chr15 | + | 1083  | NM_024063    |
| D3A_WT | 2103 | 44418385  | 44418514  | 2.14 | SPATS1     | chr6  | + | 75    | NM_145026    |
| D3A_WT | 1106 | 12647880  | 12648299  | 2.05 | SPIRE1     | chr18 | - | -177  | NM_020148    |
| D3A_WT | 1106 | 12647880  | 12648299  | 2.05 | SPIRE1     | chr18 | - | -1358 | NM_001128627 |
| D3A_WT | 926  | 88422222  | 88422871  | 2.33 | SPIRE2     | chr16 | + | 139   | NM_032451    |
| D3A_WT | 940  | 4351613   | 4351771   | 2.01 | SPNS2      | chr17 | + | 2815  | NM_001124758 |
| D3A_WT | 55   | 9274971   | 9275721   | 2.56 | SPSB1      | chr1  | + | -181  | NM_025106    |
| D3A_WT | 56   | 9276296   | 9277120   | 2.96 | SPSB1      | chr1  | + | 1181  | NM_025106    |
| D3A_WT | 814  | 1777229   | 1778648   | 3.23 | SPSB3      | chr16 | - | -5356 | NM_080861    |
| D3A_WT | 2100 | 43247124  | 43248052  | 2.85 | SRF        | chr6  | + | 691   | NM_003131    |
| D3A_WT | 530  | 62524023  | 62524487  | 2.91 | SRGAP1     | chr12 | + | -552  | NM_020762    |
| D3A_WT | 1598 | 61650934  | 61651164  | 2.84 | SRMS       | chr20 | - | -1748 | NM_080823    |
| D3A_WT | 2604 | 152702234 | 152702358 | 2.07 | SRPK3      | chrX  | + | 2593  | NM_014370    |
| D3A_WT | 2259 | 100310677 | 100311337 | 3.07 | SRRT       | chr7  | + | 371   | NM_015908    |
| D3A_WT | 1538 | 581764    | 582192    | 2.74 | SRXN1      | chr20 | - | -88   | NM_080725    |
| D3A_WT | 1581 | 60151957  | 60152601  | 2.4  | SS18L1     | chr20 | + | 63    | NM_198935    |
| D3A_WT | 1477 | 170363640 | 170363889 | 2.62 | SSB        | chr2  | + | 130   | NM_003142    |
| D3A_WT | 1369 | 60686420  | 60686879  | 2.34 | SSC5D      | chr19 | + | -5032 | NM_001144950 |
| D3A_WT | 1370 | 60690828  | 60692293  | 3.42 | SSC5D      | chr19 | + | -121  | NM_001144950 |
| D3A_WT | 427  | 66824654  | 66825678  | 2.93 | SSH3       | chr11 | + | -2328 | NM_017857    |
| D3A_WT | 806  | 1071702   | 1072132   | 2.88 | SSTR5      | chr16 | + | 3136  | NM_001053    |
| D3A_WT | 1715 | 39582849  | 39583398  | 3.28 | ST13       | chr22 | - | -490  | NM_003932    |
| D3A_WT | 1052 | 72092854  | 72094103  | 2.79 | ST6GALNAC2 | chr17 | - | 262   | NM_006456    |
| D3A_WT | 2482 | 129701694 | 129701828 | 3.02 | ST6GALNAC6 | chr9  | - | -69   | NM_013443    |
| D3A_WT | 772  | 90736962  | 90739226  | 3.18 | ST8SIA2    | chr15 | + | -49   | NM_006011    |
| D3A_WT | 762  | 79403524  | 79403673  | 2.3  | STARD5     | chr15 | - | -19   | NM_181900    |
| D3A_WT | 1119 | 50137943  | 50138222  | 2.41 | STARD6     | chr18 | - | -3141 | NM_139171    |
| D3A_WT | 994  | 37793566  | 37793780  | 2.7  | STAT3      | chr17 | - | 366   | NM_139276    |
| D3A_WT | 994  | 37793566  | 37793780  | 2.7  | STAT3      | chr17 | - | 258   | NM_213662    |
| D3A_WT | 1459 | 119697153 | 119698202 | 2.15 | STEAP3     | chr2  | + | -176  | NM_182915    |
| D3A_WT | 1905 | 26471541  | 26472557  | 3.35 | STIM2      | chr4  | + | 588   | NM_020860    |
| D3A_WT | 2040 | 171547496 | 171547645 | 2.37 | STK10      | chr5  | - | 381   | NM_005990    |
| D3A_WT | 1160 | 1157623   | 1158348   | 2.73 | STK11      | chr19 | + | 1188  | NM_000455    |
| D3A_WT | 1476 | 168811366 | 168812412 | 3.25 | STK39      | chr2  | - | 462   | NM_013233    |
| D3A_WT | 1953 | 185063837 | 185065185 | 2.4  | STOX2      | chr4  | + | 1009  | NM_020225    |
| D3A_WT | 794  | 662497    | 663146    | 3.17 | STUB1      | chr16 | + | -7294 | NM_005861    |
| D3A_WT | 1249 | 13125321  | 13125445  | 2.9  | STX10      | chr19 | - | -3396 | NM_003765    |
| D3A_WT | 568  | 129889280 | 129889529 | 2.84 | STX2       | chr12 | - | 360   | NM_001980    |
| D3A_WT | 645  | 24589061  | 24589284  | 2.17 | STXBP6     | chr14 | - | -237  | NM_014178    |
| D3A_WT | 599  | 47472945  | 47473074  | 2.53 | SUCLA2     | chr13 | - | 454   | NM_003850    |
| D3A_WT | 556  | 117298950 | 117299099 | 2.72 | SUDS3      | chr12 | + | 284   | NM_022491    |
| D3A_WT | 858  | 28532476  | 28532895  | 2.51 | SULT1A1    | chr16 | - | -4535 | NM_177534    |
| D3A_WT | 858  | 28532476  | 28532895  | 2.51 | SULT1A1    | chr16 | - | -3827 | NM_177529    |
| D3A_WT | 1726 | 42589436  | 42590165  | 3.09 | SULT4A1    | chr22 | - | -89   | NM_014351    |

|        |      |           |           |      |         |       |   |       |              |
|--------|------|-----------|-----------|------|---------|-------|---|-------|--------------|
| D3A_WT | 1047 | 70690077  | 70690441  | 2.09 | SUMO2   | chr17 | - | 434   | NM_001005849 |
| D3A_WT | 526  | 54676732  | 54676961  | 2.66 | SUOX    | chr12 | + | -463  | NM_001032387 |
| D3A_WT | 2464 | 113977093 | 113977337 | 2.21 | SUSD1   | chr9  | - | 162   | NM_022486    |
| D3A_WT | 1687 | 22904057  | 22904192  | 2.14 | SUSD2   | chr22 | + | -3319 | NM_019601    |
| D3A_WT | 894  | 75785137  | 75785591  | 2.34 | SYCE1L  | chr16 | + | -5485 | NM_001129979 |
| D3A_WT | 2563 | 47370977  | 47371126  | 2.81 | SYN1    | chrX  | - | -6851 | NM_006950    |
| D3A_WT | 1760 | 12022298  | 12022432  | 3.15 | SYN2    | chr3  | + | 1504  | NM_133625    |
| D3A_WT | 2110 | 86410106  | 86410656  | 2.96 | SYNCRIP | chr6  | - | -1022 | NM_001159673 |
| D3A_WT | 2110 | 86410106  | 86410656  | 2.96 | SYNCRIP | chr6  | - | -619  | NM_001159677 |
| D3A_WT | 2110 | 86410106  | 86410656  | 2.96 | SYNCRIP | chr6  | - | -1054 | NM_001159674 |
| D3A_WT | 2110 | 86410106  | 86410656  | 2.96 | SYNCRIP | chr6  | - | -2493 | NM_001159676 |
| D3A_WT | 133  | 109810749 | 109811290 | 2.63 | SYPL2   | chr1  | + | 397   | NM_001040709 |
| D3A_WT | 1365 | 60389358  | 60389583  | 2.32 | SYT5    | chr19 | - | -5938 | NM_003180    |
| D3A_WT | 1877 | 1691498   | 1692457   | 2.29 | TACC3   | chr4  | + | -1086 | NM_006342    |
| D3A_WT | 248  | 70849404  | 70849970  | 3.05 | TACR2   | chr10 | - | -3007 | NM_001057    |
| D3A_WT | 206  | 227828051 | 227828293 | 2.43 | TAF5L   | chr1  | - | 245   | NM_014409    |
| D3A_WT | 328  | 737657    | 737906    | 2.02 | TALDO1  | chr11 | + | 350   | NM_006755    |
| D3A_WT | 556  | 117298950 | 117299099 | 2.72 | TAOK3   | chr12 | - | -3891 | NM_016281    |
| D3A_WT | 2088 | 33393371  | 33393816  | 2.51 | TAPBP   | chr6  | - | -3451 | NM_172209    |
| D3A_WT | 937  | 3518643   | 3519077   | 2.2  | TAX1BP3 | chr17 | - | -138  | NM_014604    |
| D3A_WT | 1344 | 55071648  | 55071812  | 2.78 | TBC1D17 | chr19 | + | -763  | NM_001168222 |
| D3A_WT | 822  | 2457718   | 2457981   | 2.25 | TBC1D24 | chr16 | + | -7298 | NM_020705    |
| D3A_WT | 823  | 2465432   | 2465661   | 2.4  | TBC1D24 | chr16 | + | 399   | NM_020705    |
| D3A_WT | 606  | 74953781  | 74954400  | 3.26 | TBC1D4  | chr13 | - | 161   | NM_014832    |
| D3A_WT | 2056 | 179267182 | 179267615 | 2.58 | TBC1D9B | chr5  | - | 64    | NM_015043    |
| D3A_WT | 1093 | 78302128  | 78302705  | 3.29 | TBCD    | chr17 | + | -812  | NM_005993    |
| D3A_WT | 2547 | 9393594   | 9394643   | 3.39 | TBL1X   | chrX  | + | 918   | NM_005647    |
| D3A_WT | 2547 | 9393594   | 9394643   | 3.39 | TBL1X   | chrX  | + | 2784  | NM_001139466 |
| D3A_WT | 1839 | 178404285 | 178404734 | 2.32 | TBL1XR1 | chr3  | - | -6767 | NM_024665    |
| D3A_WT | 2169 | 170703904 | 170704068 | 2.33 | TBP     | chr6  | + | -1409 | NM_003194    |
| D3A_WT | 2108 | 85530425  | 85530589  | 2.67 | TBX18   | chr6  | - | 111   | NM_001080508 |
| D3A_WT | 1027 | 56829273  | 56829402  | 2.87 | TBX2    | chr17 | + | -2701 | NM_005994    |
| D3A_WT | 1028 | 56886895  | 56887064  | 2.55 | TBX4    | chr17 | + | -1609 | NM_018488    |
| D3A_WT | 673  | 91372244  | 91372698  | 2.31 | TC2N    | chr14 | - | 131   | NM_152332    |
| D3A_WT | 1115 | 42812873  | 42813156  | 2.3  | TCEB3B  | chr18 | - | 2972  | NM_016427    |
| D3A_WT | 1115 | 42812873  | 42813156  | 2.3  | TCEB3C  | chr18 | - | -2567 | NM_145653    |
| D3A_WT | 1115 | 42812873  | 42813156  | 2.3  | TCEB3CL | chr18 | - | -2803 | NM_001100817 |
| D3A_WT | 301  | 133005668 | 133005803 | 2.09 | TCERG1L | chr10 | - | -5761 | NM_174937    |
| D3A_WT | 290  | 114701819 | 114702283 | 2.23 | TCF7L2  | chr10 | + | 2053  | NM_001146285 |
| D3A_WT | 430  | 67565389  | 67566568  | 3.67 | TCIRG1  | chr11 | + | -1044 | NM_006053    |
| D3A_WT | 430  | 67565389  | 67566568  | 3.67 | TCIRG1  | chr11 | + | 2920  | NM_006019    |
| D3A_WT | 291  | 115929228 | 115929362 | 2.42 | TDRD1   | chr10 | + | 277   | NM_198795    |
| D3A_WT | 605  | 59869508  | 59870057  | 2.81 | TDRD3   | chr13 | + | 355   | NM_001146070 |
| D3A_WT | 605  | 59869508  | 59870057  | 2.81 | TDRD3   | chr13 | + | 1191  | NM_030794    |
| D3A_WT | 173  | 177827581 | 177827923 | 3.05 | TDRD5   | chr1  | + | 105   | NM_173533    |
| D3A_WT | 2456 | 99214454  | 99214593  | 2.19 | TDRD7   | chr9  | + | 401   | NM_014290    |
| D3A_WT | 2091 | 35572124  | 35572560  | 2.46 | TEAD3   | chr6  | - | 497   | NM_003214    |

|        |      |           |           |      |                |       |   |       |              |
|--------|------|-----------|-----------|------|----------------|-------|---|-------|--------------|
| D3A_WT | 1440 | 94902882  | 94903116  | 2.16 | TEKT4          | chr2  | + | 2041  | NM_144705    |
| D3A_WT | 812  | 1483300   | 1483619   | 2.7  | TELO2          | chr16 | + | 107   | NM_016111    |
| D3A_WT | 109  | 45731326  | 45731654  | 2.4  | TESK2          | chr1  | - | -2063 | NM_007170    |
| D3A_WT | 827  | 2788650   | 2789080   | 2.36 | TESSP1         | chr16 | + | 379   | NM_001135086 |
| D3A_WT | 2072 | 10527421  | 10527835  | 2.52 | TFAP2A         | chr6  | - | -4172 | NM_003220    |
| D3A_WT | 2072 | 10527421  | 10527835  | 2.52 | TFAP2A         | chr6  | - | -7035 | NM_001032280 |
| D3A_WT | 2072 | 10527421  | 10527835  | 2.52 | TFAP2A         | chr6  | - | 155   | NM_001042425 |
| D3A_WT | 1574 | 54634668  | 54634917  | 2.6  | TFAP2C         | chr20 | + | -2972 | NM_003222    |
| D3A_WT | 634  | 113286568 | 113287529 | 3.15 | TFDP1          | chr13 | + | 45    | NR_026580    |
| D3A_WT | 634  | 113286568 | 113287529 | 3.15 | TFDP1          | chr13 | + | -8    | NM_007111    |
| D3A_WT | 2568 | 48787783  | 48787961  | 3.08 | TFE3           | chrX  | - | 62    | NM_006521    |
| D3A_WT | 1359 | 59318017  | 59318366  | 2.43 | TFPT           | chr19 | - | -7324 | NM_013342    |
| D3A_WT | 612  | 94052287  | 94052511  | 2.16 | TGDS           | chr13 | - | -5887 | NM_014305    |
| D3A_WT | 2457 | 100907443 | 100907587 | 2.62 | TGFBR1         | chr9  | + | 283   | NM_001130916 |
| D3A_WT | 1529 | 242224706 | 242226417 | 3.5  | THAP4          | chr2  | - | -163  | NM_015963    |
| D3A_WT | 1137 | 330706    | 330836    | 2.26 | THEG           | chr19 | - | -3762 | NM_199202    |
| D3A_WT | 1845 | 185580844 | 185581398 | 2.51 | THPO           | chr3  | - | -2495 | NM_000460    |
| D3A_WT | 462  | 118798472 | 118798846 | 2.51 | THY1           | chr11 | - | 797   | NM_006288    |
| D3A_WT | 1617 | 31853365  | 31853614  | 2.35 | TIAM1          | chr21 | - | -328  | NM_003253    |
| D3A_WT | 1189 | 2375088   | 2375922   | 2.56 | TIMM13         | chr19 | - | 3370  | NM_012458    |
| D3A_WT | 2565 | 48643998  | 48644661  | 2.11 | TIMM17B        | chrX  | - | -3959 | NM_005834    |
| D3A_WT | 2435 | 70978603  | 70978882  | 2.27 | TJP2           | chr9  | + | -166  | NM_201629    |
| D3A_WT | 1193 | 2982055   | 2982175   | 2.38 | TLE2           | chr19 | - | -1950 | NM_003260    |
| D3A_WT | 1193 | 2982055   | 2982175   | 2.38 | TLE2           | chr19 | - | -1503 | NM_001144762 |
| D3A_WT | 748  | 68178273  | 68179421  | 2.22 | TLE3           | chr15 | - | -1537 | NM_020908    |
| D3A_WT | 2458 | 102274842 | 102276717 | 2.59 | TMEFF1         | chr9  | + | 242   | NM_003692    |
| D3A_WT | 1043 | 70283969  | 70284123  | 2.69 | TMEM104        | chr17 | + | -170  | NM_017728    |
| D3A_WT | 1800 | 52906443  | 52906692  | 2.65 | TMEM110        | chr3  | - | 20    | NM_198563    |
| D3A_WT | 506  | 42516090  | 42516319  | 2.85 | TMEM117        | chr12 | + | -24   | NM_032256    |
| D3A_WT | 710  | 105065125 | 105066779 | 2.79 | TMEM121        | chr14 | + | 1955  | NM_025268    |
| D3A_WT | 1877 | 1691498   | 1692457   | 2.29 | TMEM129        | chr4  | - | 905   | NM_001127266 |
| D3A_WT | 422  | 65816350  | 65817199  | 2.46 | TMEM151A       | chr11 | + | 826   | NM_153266    |
| D3A_WT | 1775 | 45241862  | 45242812  | 3.51 | TMEM158        | chr3  | - | 481   | NM_015444    |
| D3A_WT | 2592 | 109132400 | 109132778 | 2.53 | TMEM164        | chrX  | + | -408  | NM_032227    |
| D3A_WT | 2592 | 109132400 | 109132778 | 2.53 | TMEM164        | chrX  | + | 71    | NM_017698    |
| D3A_WT | 2151 | 158877974 | 158878119 | 2.09 | TMEM181        | chr6  | + | 591   | NM_020823    |
| D3A_WT | 1567 | 48203568  | 48204422  | 3.71 | TMEM189        | chr20 | - | -253  | NM_199129    |
| D3A_WT | 1567 | 48203568  | 48204422  | 3.71 | TMEM189-UBE2V1 | chr20 | - | -253  | NM_199203    |
| D3A_WT | 1494 | 220118366 | 220121700 | 4.54 | TMEM198        | chr2  | + | 3045  | NM_001005209 |
| D3A_WT | 974  | 23708354  | 23708603  | 2.6  | TMEM199        | chr17 | + | -335  | NM_152464    |
| D3A_WT | 2437 | 73573341  | 73574495  | 2.77 | TMEM2          | chr9  | - | -298  | NM_001135820 |
| D3A_WT | 1100 | 5880626   | 5881170   | 2.29 | TMEM200C       | chr18 | - | 1205  | NM_001080209 |
| D3A_WT | 466  | 123258953 | 123259229 | 2.14 | TMEM225        | chr11 | - | 2459  | NM_001013743 |
| D3A_WT | 2274 | 123459928 | 123460867 | 3.1  | TMEM229A       | chr7  | - | 362   | NM_001136002 |
| D3A_WT | 658  | 67051959  | 67052138  | 2.25 | TMEM229B       | chr14 | - | -274  | NM_182526    |
| D3A_WT | 655  | 60816980  | 60817434  | 3.09 | TMEM30B        | chr14 | - | 1076  | NM_001017970 |
| D3A_WT | 1460 | 119905456 | 119905914 | 2.35 | TMEM37         | chr2  | + | -230  | NM_183240    |

|        |      |           |           |      |          |       |   |       |              |
|--------|------|-----------|-----------|------|----------|-------|---|-------|--------------|
| D3A_WT | 1260 | 16633010  | 16633249  | 2.68 | TMEM38A  | chr19 | + | 192   | NM_024074    |
| D3A_WT | 2358 | 91727548  | 91727892  | 2.78 | TMEM64   | chr8  | - | -411  | NM_001146273 |
| D3A_WT | 327  | 684680    | 685544    | 2.15 | TMEM80   | chr11 | + | -503  | NM_174940    |
| D3A_WT | 64   | 15943509  | 15944123  | 3.01 | TMEM82   | chr1  | + | 2313  | NM_001013641 |
| D3A_WT | 937  | 3518643   | 3519077   | 2.2  | TMEM93   | chr17 | + | 22    | NM_031298    |
| D3A_WT | 1205 | 4256123   | 4256755   | 2.74 | TMIGD2   | chr19 | - | -3011 | NM_144615    |
| D3A_WT | 1706 | 35836454  | 35837198  | 2.47 | TMPRSS6  | chr22 | - | -7187 | NM_153609    |
| D3A_WT | 1547 | 7948087   | 7949074   | 2.94 | TMX4     | chr20 | - | -187  | NM_021156    |
| D3A_WT | 2141 | 138233454 | 138233933 | 2.29 | TNFAIP3  | chr6  | + | 3420  | NM_006290    |
| D3A_WT | 48   | 6453355   | 6453690   | 2.86 | TNFRSF25 | chr1  | - | -4680 | NM_148970    |
| D3A_WT | 1601 | 61791100  | 61792019  | 3.38 | TNFRSF6B | chr20 | + | -5172 | NM_032945    |
| D3A_WT | 1601 | 61791100  | 61792019  | 3.38 | TNFRSF6B | chr20 | + | -6905 | NM_003823    |
| D3A_WT | 1221 | 6481642   | 6481776   | 2.48 | TNFSF9   | chr19 | + | -300  | NM_003811    |
| D3A_WT | 1883 | 2727582   | 2727716   | 2.17 | TNIP2    | chr4  | - | -99   | NM_001161527 |
| D3A_WT | 1883 | 2727582   | 2727716   | 2.17 | TNIP2    | chr4  | - | 252   | NM_024309    |
| D3A_WT | 346  | 1818098   | 1819657   | 3.24 | TNNI2    | chr11 | + | 1583  | NM_001145829 |
| D3A_WT | 346  | 1818098   | 1819657   | 3.24 | TNNI2    | chr11 | + | 2069  | NM_003282    |
| D3A_WT | 346  | 1818098   | 1819657   | 3.24 | TNNI2    | chr11 | + | 870   | NM_001145841 |
| D3A_WT | 347  | 1892427   | 1893662   | 3.37 | TNNT3    | chr11 | + | -4330 | NM_001042782 |
| D3A_WT | 149  | 149955637 | 149955776 | 2    | TNRC4    | chr1  | - | 208   | NM_007185    |
| D3A_WT | 150  | 149960712 | 149960861 | 3.02 | TNRC4    | chr1  | - | -4872 | NM_007185    |
| D3A_WT | 334  | 1287386   | 1287735   | 2.74 | TOLLIP   | chr11 | - | -145  | NM_019009    |
| D3A_WT | 2359 | 96030480  | 96031327  | 3.46 | TP53INP1 | chr8  | - | -112  | NM_033285    |
| D3A_WT | 866  | 33113672  | 33113896  | 2.62 | TP53TG3  | chr16 | + | 1304  | NM_016212    |
| D3A_WT | 866  | 33113672  | 33113896  | 2.62 | TP53TG3B | chr16 | + | 2128  | NM_001099687 |
| D3A_WT | 1604 | 61963624  | 61964563  | 2.91 | TPD52L2  | chr20 | + | -2940 | NM_199359    |
| D3A_WT | 37   | 3531845   | 3531969   | 2.11 | TPRG1L   | chr1  | + | 492   | NM_182752    |
| D3A_WT | 951  | 7775287   | 7776027   | 2.5  | TRAPPC1  | chr17 | - | 385   | NM_001166621 |
| D3A_WT | 951  | 7775287   | 7776027   | 2.5  | TRAPPC1  | chr17 | - | 335   | NM_021210    |
| D3A_WT | 92   | 36394154  | 36395738  | 2.74 | TRAPPC3  | chr1  | - | -7292 | NM_014408    |
| D3A_WT | 2373 | 141536845 | 141536989 | 2.06 | TRAPPC9  | chr8  | - | 126   | NM_001160372 |
| D3A_WT | 2373 | 141536845 | 141536989 | 2.06 | TRAPPC9  | chr8  | - | 943   | NM_031466    |
| D3A_WT | 2369 | 126512566 | 126512695 | 2.05 | TRIB1    | chr8  | + | 886   | NM_025195    |
| D3A_WT | 2368 | 126510679 | 126511218 | 3.75 | TRIB1    | chr8  | + | -796  | NM_025195    |
| D3A_WT | 1537 | 309907    | 310376    | 2.8  | TRIB3    | chr20 | + | 834   | NM_021158    |
| D3A_WT | 140  | 114855027 | 114855654 | 2.68 | TRIM33   | chr1  | - | -36   | NM_033020    |
| D3A_WT | 2261 | 100516733 | 100517682 | 5.22 | TRIM56   | chr7  | + | 1702  | NM_030961    |
| D3A_WT | 1768 | 32835070  | 32835314  | 2.02 | TRIM71   | chr3  | + | 679   | NM_001039111 |
| D3A_WT | 1248 | 13090027  | 13090466  | 2.52 | TRMT1    | chr19 | - | -1683 | NM_001136035 |
| D3A_WT | 1248 | 13090027  | 13090466  | 2.52 | TRMT1    | chr19 | - | -1783 | NM_001142554 |
| D3A_WT | 1666 | 18484698  | 18485527  | 2.43 | TRMT2A   | chr22 | - | -344  | NM_022727    |
| D3A_WT | 1667 | 18490402  | 18490843  | 3.71 | TRMT2A   | chr22 | - | -5854 | NM_022727    |
| D3A_WT | 82   | 27193217  | 27193736  | 3.48 | TRNP1    | chr1  | + | 695   | NM_001013642 |
| D3A_WT | 359  | 2406792   | 2407258   | 2.15 | TRPM5    | chr11 | - | -6174 | NM_014555    |
| D3A_WT | 2289 | 142298239 | 142298574 | 2.34 | TRPV6    | chr7  | - | -4807 | NM_018646    |
| D3A_WT | 597  | 44049405  | 44050254  | 3    | TSC22D1  | chr13 | - | -1128 | NM_183422    |
| D3A_WT | 2257 | 99918923  | 99919141  | 2.18 | TSC22D4  | chr7  | - | -4194 | NM_030935    |

|        |      |           |           |      |         |       |   |       |              |
|--------|------|-----------|-----------|------|---------|-------|---|-------|--------------|
| D3A_WT | 2375 | 143482371 | 143482500 | 2.01 | TSNARE1 | chr8  | - | 13    | NM_145003    |
| D3A_WT | 260  | 82204451  | 82205081  | 2.82 | TSPAN14 | chr10 | + | 749   | NM_001128309 |
| D3A_WT | 481  | 3056346   | 3056968   | 2.33 | TSPAN9  | chr12 | + | -124  | NM_001168320 |
| D3A_WT | 2628 | 9974079   | 9975173   | 3.08 | TSPY3   | chrY  | + | -881  | NM_001077697 |
| D3A_WT | 358  | 2378002   | 2378156   | 2.15 | TSSC4   | chr11 | + | -2019 | NM_005706    |
| D3A_WT | 1705 | 35744338  | 35744472  | 2.62 | TST     | chr22 | - | 1032  | NM_003312    |
| D3A_WT | 457  | 112690646 | 112691071 | 3.03 | TTC12   | chr11 | + | 398   | NM_017868    |
| D3A_WT | 2481 | 129517231 | 129517855 | 2.52 | TTC16   | chr9  | + | -635  | NM_144965    |
| D3A_WT | 8    | 1106165   | 1107205   | 3.67 | TTLL10  | chr1  | + | 1746  | NM_153254    |
| D3A_WT | 2636 | 22997580  | 22997765  | 2.36 | TTY6    | chrY  | - | -678  | NR_001527    |
| D3A_WT | 2636 | 22997580  | 22997765  | 2.36 | TTY6B   | chrY  | + | 2545  | NR_002175    |
| D3A_WT | 580  | 18654242  | 18654516  | 2.78 | TUBA3C  | chr13 | - | -443  | NM_006001    |
| D3A_WT | 927  | 88517157  | 88517301  | 2.71 | TUBB3   | chr16 | + | -16   | NM_006086    |
| D3A_WT | 1695 | 29695189  | 29695323  | 2.25 | TUG1    | chr22 | + | -377  | NR_002323    |
| D3A_WT | 2092 | 35594774  | 35595129  | 3.02 | TULP1   | chr6  | - | -6326 | NM_003322    |
| D3A_WT | 2419 | 25667969  | 25668188  | 2.12 | TUSC1   | chr9  | - | 778   | NM_001004125 |
| D3A_WT | 1797 | 52248157  | 52248421  | 2.79 | TWF2    | chr3  | - | -66   | NM_007284    |
| D3A_WT | 1796 | 52246047  | 52246221  | 2.26 | TWF2    | chr3  | - | 2089  | NM_007284    |
| D3A_WT | 116  | 52294710  | 52295079  | 3.23 | TXNDC12 | chr1  | - | -1259 | NM_015913    |
| D3A_WT | 142  | 144147945 | 144148515 | 3.38 | TXNIP   | chr1  | + | -1588 | NM_006472    |
| D3A_WT | 732  | 39638352  | 39638876  | 3.22 | TYRO3   | chr15 | + | 91    | NM_006293    |
| D3A_WT | 169  | 160798146 | 160798430 | 2.37 | UAP1    | chr1  | + | 369   | NM_003115    |
| D3A_WT | 1805 | 69212003  | 69212241  | 2.91 | UBA3    | chr3  | - | 92    | NM_198195    |
| D3A_WT | 11   | 1198699   | 1198928   | 2.98 | UBE2J2  | chr1  | - | 284   | NM_058167    |
| D3A_WT | 120  | 64441878  | 64442132  | 2.85 | UBE2U   | chr1  | + | -72   | NM_152489    |
| D3A_WT | 1013 | 44340796  | 44341210  | 2.22 | UBE2Z   | chr17 | + | 238   | NM_023079    |
| D3A_WT | 840  | 4837595   | 4838144   | 2.72 | UBN1    | chr16 | + | -43   | NM_001079514 |
| D3A_WT | 840  | 4837595   | 4838144   | 2.72 | UBN1    | chr16 | + | -4208 | NM_016936    |
| D3A_WT | 2440 | 85512593  | 85512752  | 2.4  | UBQLN1  | chr9  | - | 316   | NM_053067    |
| D3A_WT | 159  | 154290347 | 154290889 | 3.26 | UBQLN4  | chr1  | - | -478  | NM_020131    |
| D3A_WT | 2346 | 59486407  | 59486874  | 2.8  | UBXN2B  | chr8  | + | 264   | NM_001077619 |
| D3A_WT | 2501 | 133403277 | 133403402 | 2.21 | UCK1    | chr9  | - | -6856 | NM_031432    |
| D3A_WT | 439  | 73371409  | 73371553  | 2.11 | UCP2    | chr11 | - | 56    | NM_003355    |
| D3A_WT | 2260 | 100327650 | 100331691 | 3.28 | UFSP1   | chr7  | - | -4395 | NM_001015072 |
| D3A_WT | 1212 | 4860244   | 4860869   | 2.9  | UHRF1   | chr19 | + | 47    | NM_001048201 |
| D3A_WT | 1212 | 4860244   | 4860869   | 2.9  | UHRF1   | chr19 | + | -1009 | NM_013282    |
| D3A_WT | 572  | 130945662 | 130946497 | 3.27 | ULK1    | chr12 | + | 848   | NM_003565    |
| D3A_WT | 967  | 19711545  | 19711774  | 2.4  | ULK2    | chr17 | - | 172   | NM_014683    |
| D3A_WT | 753  | 72923025  | 72923494  | 2.8  | ULK3    | chr15 | - | -654  | NM_001099436 |
| D3A_WT | 975  | 23903573  | 23903702  | 2.2  | UNC119  | chr17 | - | 136   | NM_005148    |
| D3A_WT | 559  | 119632713 | 119633162 | 2.41 | UNC119B | chr12 | + | 724   | NM_001080533 |
| D3A_WT | 981  | 30493024  | 30493188  | 2.28 | UNC45B  | chr17 | + | -5842 | NM_173167    |
| D3A_WT | 250  | 72640384  | 72640918  | 3.5  | UNC5B   | chr10 | + | -1652 | NM_170744    |
| D3A_WT | 2182 | 1240008   | 1240847   | 2.44 | UNCX    | chr7  | + | 1248  | NM_001080461 |
| D3A_WT | 2181 | 1237006   | 1237155   | 2.31 | UNCX    | chr7  | + | -2099 | NM_001080461 |
| D3A_WT | 1051 | 71286749  | 71286978  | 2.25 | UNK     | chr17 | + | -5412 | NM_001080419 |
| D3A_WT | 206  | 227828051 | 227828293 | 2.43 | URB2    | chr1  | + | -431  | NM_014777    |

|        |      |           |           |      |         |       |   |       |              |
|--------|------|-----------|-----------|------|---------|-------|---|-------|--------------|
| D3A_WT | 1096 | 148295    | 148755    | 3.16 | USP14   | chr18 | + | 43    | NM_001037334 |
| D3A_WT | 118  | 55453465  | 55453604  | 2.1  | USP24   | chr1  | - | 93    | NM_015306    |
| D3A_WT | 460  | 113251261 | 113251610 | 2.87 | USP28   | chr11 | - | 31    | NM_020886    |
| D3A_WT | 1378 | 62322221  | 62322375  | 2.17 | USP29   | chr19 | + | -1022 | NM_020903    |
| D3A_WT | 1056 | 74348328  | 74349157  | 3.03 | USP36   | chr17 | - | -178  | NM_025090    |
| D3A_WT | 738  | 48503703  | 48504027  | 2.38 | USP8    | chr15 | + | -5    | NM_005154    |
| D3A_WT | 2633 | 13320559  | 13320811  | 2.22 | USP9Y   | chrY  | + | -1868 | NM_004654    |
| D3A_WT | 592  | 30089722  | 30090787  | 3.15 | USPL1   | chr13 | + | 425   | NM_005800    |
| D3A_WT | 1849 | 192530002 | 192530544 | 2.92 | UTS2D   | chr3  | - | 746   | NM_198152    |
| D3A_WT | 2638 | 57622880  | 57624486  | 2.57 | VAMP7   | chrY  | + | 343   | NM_001145149 |
| D3A_WT | 1577 | 56393461  | 56393630  | 2.36 | VAPB    | chr20 | + | -4105 | NM_004738    |
| D3A_WT | 838  | 4361733   | 4361982   | 2.85 | VASN    | chr16 | + | 8     | NM_138440    |
| D3A_WT | 1326 | 50701914  | 50702603  | 2.38 | VASP    | chr19 | + | -269  | NM_003370    |
| D3A_WT | 895  | 76380291  | 76380555  | 2.33 | VAT1L   | chr16 | + | 440   | NM_020927    |
| D3A_WT | 254  | 75427699  | 75428538  | 2.78 | VCL     | chr10 | + | 241   | NM_003373    |
| D3A_WT | 315  | 134898869 | 134899338 | 2.67 | VENTX   | chr10 | + | -2294 | NM_014468    |
| D3A_WT | 1024 | 53420941  | 53421295  | 2.69 | VEZF1   | chr17 | - | -504  | NM_007146    |
| D3A_WT | 2262 | 100592719 | 100593956 | 3.34 | VGf     | chr7  | - | 2235  | NM_003378    |
| D3A_WT | 233  | 17310604  | 17311459  | 2.84 | VIM     | chr10 | + | 768   | NM_003380    |
| D3A_WT | 2317 | 158630690 | 158630899 | 2.68 | VIPR2   | chr7  | - | -384  | NM_003382    |
| D3A_WT | 2599 | 150316291 | 150316808 | 2.28 | VMA21   | chrX  | + | 235   | NM_001017980 |
| D3A_WT | 1684 | 22423282  | 22423428  | 2.34 | VPREB3  | chr22 | - | 3275  | NM_013378    |
| D3A_WT | 403  | 60685424  | 60685563  | 2.33 | VPS37C  | chr11 | - | -1    | NM_017966    |
| D3A_WT | 678  | 96333669  | 96333893  | 2.54 | VRK1    | chr14 | + | 345   | NM_003384    |
| D3A_WT | 238  | 28862023  | 28862569  | 3.1  | WAC     | chr10 | + | 864   | NR_024557    |
| D3A_WT | 238  | 28862023  | 28862569  | 3.1  | WAC     | chr10 | + | -133  | NM_100486    |
| D3A_WT | 2246 | 70234524  | 70235778  | 3.04 | WBSCR17 | chr7  | + | -573  | NM_022479    |
| D3A_WT | 602  | 51056077  | 51056496  | 2.73 | WDFY2   | chr13 | + | -198  | NM_052950    |
| D3A_WT | 2564 | 48341079  | 48342198  | 2.85 | WDR13   | chrX  | + | 815   | NM_017883    |
| D3A_WT | 2564 | 48341079  | 48342198  | 2.85 | WDR13   | chrX  | + | 471   | NM_001166426 |
| D3A_WT | 791  | 631593    | 632329    | 3.41 | WDR90   | chr16 | + | -7402 | NM_145294    |
| D3A_WT | 792  | 638583    | 639530    | 3.12 | WDR90   | chr16 | + | -307  | NM_145294    |
| D3A_WT | 1472 | 159850839 | 159851669 | 2.69 | WDSUB1  | chr2  | - | 95    | NM_001128213 |
| D3A_WT | 1472 | 159850839 | 159851669 | 2.69 | WDSUB1  | chr2  | - | 55    | NM_152528    |
| D3A_WT | 1472 | 159850839 | 159851669 | 2.69 | WDSUB1  | chr2  | - | 228   | NM_001128212 |
| D3A_WT | 2288 | 141048333 | 141048682 | 2.43 | WEE2    | chr7  | + | -6114 | NM_001105558 |
| D3A_WT | 790  | 623567    | 624646    | 2.56 | WFIKKN1 | chr16 | + | 3094  | NM_053284    |
| D3A_WT | 1890 | 6322109   | 6322661   | 2.21 | WFS1    | chr4  | + | -92   | NM_006005    |
| D3A_WT | 1879 | 1842991   | 1843755   | 2.47 | WHSC1   | chr4  | + | 453   | NM_001042424 |
| D3A_WT | 2337 | 38358825  | 38359587  | 2.18 | WHSC1L1 | chr8  | - | -259  | NM_023034    |
| D3A_WT | 476  | 732514    | 733368    | 2.27 | WNK1    | chr12 | + | 456   | NM_018979    |
| D3A_WT | 446  | 75598876  | 75599697  | 2.89 | WNT11   | chr11 | - | -4064 | NM_004626    |
| D3A_WT | 1803 | 55499271  | 55499422  | 2.28 | WNT5A   | chr3  | - | -2975 | NM_003392    |
| D3A_WT | 1491 | 219432091 | 219433042 | 3.04 | WNT6    | chr2  | + | -223  | NM_006522    |
| D3A_WT | 1734 | 44753627  | 44753766  | 2.36 | WNT7B   | chr22 | - | -2024 | NM_058238    |
| D3A_WT | 1735 | 44754307  | 44755369  | 3.38 | WNT7B   | chr22 | - | -3166 | NM_058238    |
| D3A_WT | 944  | 5913678   | 5914512   | 2.09 | WSCD1   | chr17 | + | -562  | NM_015253    |



|        |      |           |           |      |         |       |   |       |              |
|--------|------|-----------|-----------|------|---------|-------|---|-------|--------------|
| D3A_WT | 2153 | 160068667 | 160068923 | 2.46 | WTAP    | chr6  | + | 654   | NM_004906    |
| D3A_WT | 2153 | 160068667 | 160068923 | 2.46 | WTAP    | chr6  | + | 186   | NM_152857    |
| D3A_WT | 2548 | 9942640   | 9943464   | 2.37 | WWC3    | chrX  | + | -742  | NM_015691    |
| D3A_WT | 1227 | 7598927   | 7599091   | 2.45 | XAB2    | chr19 | - | 1430  | NM_020196    |
| D3A_WT | 2572 | 52403552  | 52403861  | 2.49 | XAGE2   | chrX  | - | 115   | NM_130777    |
| D3A_WT | 2572 | 52403552  | 52403861  | 2.49 | XAGE2B  | chrX  | - | -965  | NM_001079538 |
| D3A_WT | 1553 | 30019792  | 30020416  | 3.79 | XKR7    | chr20 | + | 639   | NM_001011718 |
| D3A_WT | 1715 | 39582849  | 39583398  | 3.28 | XPNPEP3 | chr22 | + | 84    | NM_022098    |
| D3A_WT | 2329 | 21832368  | 21833597  | 2.64 | XPO7    | chr8  | + | -143  | NM_015024    |
| D3A_WT | 422  | 65816350  | 65817199  | 2.46 | YIF1A   | chr11 | - | -3560 | NM_020470    |
| D3A_WT | 1297 | 43490975  | 43491694  | 2.48 | YIF1B   | chr19 | - | 1015  | NM_033557    |
| D3A_WT | 1238 | 10900214  | 10900568  | 2.84 | YIPF2   | chr19 | - | -34   | NM_024029    |
| D3A_WT | 1276 | 19501841  | 19502090  | 2.47 | YJEFN3  | chr19 | + | 1246  | NM_198537    |
| D3A_WT | 2225 | 44206929  | 44207358  | 2.75 | YKT6    | chr7  | + | 41    | NM_006555    |
| D3A_WT | 860  | 30021695  | 30022035  | 2.5  | YPEL3   | chr16 | - | -6843 | NM_031477    |
| D3A_WT | 860  | 30021695  | 30022035  | 2.5  | YPEL3   | chr16 | - | -6827 | NM_001145524 |
| D3A_WT | 1411 | 30223757  | 30224096  | 3.41 | YPEL5   | chr2  | + | 673   | NM_016061    |
| D3A_WT | 2551 | 21785236  | 21785385  | 2.39 | YY2     | chrX  | + | 787   | NM_206923    |
| D3A_WT | 1444 | 97716457  | 97716706  | 2.58 | ZAP70   | chr2  | + | -719  | NM_207519    |
| D3A_WT | 593  | 31783534  | 31783798  | 2.21 | ZAR1L   | chr13 | - | 425   | NM_001136571 |
| D3A_WT | 2543 | 2428847   | 2429753   | 2.85 | ZBED1   | chrX  | - | -292  | NM_004729    |
| D3A_WT | 1745 | 48629450  | 48630089  | 2.63 | ZBED4   | chr22 | + | -3731 | NM_014838    |
| D3A_WT | 2088 | 33393371  | 33393816  | 2.51 | ZBTB22  | chr6  | - | 104   | NM_001145338 |
| D3A_WT | 2088 | 33393371  | 33393816  | 2.51 | ZBTB22  | chr6  | - | -103  | NM_005453    |
| D3A_WT | 2479 | 128662498 | 128662848 | 2.65 | ZBTB34  | chr9  | + | -91   | NM_001099270 |
| D3A_WT | 527  | 55683913  | 55684467  | 2.64 | ZBTB39  | chr12 | - | 2307  | NM_014830    |
| D3A_WT | 157  | 153243008 | 153243152 | 2.53 | ZBTB7B  | chr1  | + | 1345  | NM_015872    |
| D3A_WT | 88   | 32777940  | 32778294  | 3.07 | ZBTB8A  | chr1  | + | 759   | NM_001040441 |
| D3A_WT | 915  | 87163875  | 87164699  | 2.91 | ZC3H18  | chr16 | + | -2    | NM_144604    |
| D3A_WT | 2582 | 73440599  | 73440848  | 2.98 | ZCCHC13 | chrX  | + | -26   | NM_203303    |
| D3A_WT | 1124 | 58340664  | 58340913  | 2.97 | ZCCHC2  | chr18 | + | -849  | NM_017742    |
| D3A_WT | 1536 | 226463    | 226612    | 2.53 | ZCCHC3  | chr20 | + | 334   | NM_033089    |
| D3A_WT | 885  | 66007510  | 66007944  | 2.65 | ZDHHC1  | chr16 | - | 113   | NM_013304    |
| D3A_WT | 1973 | 908447    | 909902    | 3.09 | ZDHHC11 | chr5  | - | -5073 | NM_024786    |
| D3A_WT | 1971 | 901837    | 901991    | 2.32 | ZDHHC11 | chr5  | - | 2187  | NM_024786    |
| D3A_WT | 1972 | 906034    | 906388    | 2.32 | ZDHHC11 | chr5  | - | -2110 | NM_024786    |
| D3A_WT | 664  | 76678088  | 76679027  | 2    | ZDHHC22 | chr14 | - | -670  | NM_174976    |
| D3A_WT | 1682 | 22072743  | 22073000  | 2.47 | ZDHHC8P | chr22 | - | 1928  | NR_003950    |
| D3A_WT | 1468 | 144991219 | 144991755 | 2.13 | ZEB2    | chr2  | - | 2899  | NM_014795    |
| D3A_WT | 2180 | 1166378   | 1166547   | 2.34 | ZFAND2A | chr7  | - | -81   | NM_182491    |
| D3A_WT | 2094 | 37895121  | 37896295  | 3.04 | ZFAND3  | chr6  | + | 424   | NM_021943    |
| D3A_WT | 2438 | 74169715  | 74170159  | 3.11 | ZFAND5  | chr9  | - | 46    | NM_006007    |
| D3A_WT | 893  | 73740456  | 73740776  | 2.78 | ZFP1    | chr16 | + | 695   | NM_153688    |
| D3A_WT | 1416 | 43307372  | 43307819  | 2.48 | ZFP36L2 | chr2  | - | -346  | NM_006887    |
| D3A_WT | 913  | 87046044  | 87048062  | 2.65 | ZFPM1   | chr16 | + | -461  | NM_153813    |
| D3A_WT | 2364 | 106400447 | 106401371 | 3.26 | ZFPM2   | chr8  | + | 587   | NM_012082    |
| D3A_WT | 1602 | 61809523  | 61810172  | 2.96 | ZGPAT   | chr20 | + | 610   | NM_001083113 |

|        |      |           |           |      |          |       |   |       |              |
|--------|------|-----------|-----------|------|----------|-------|---|-------|--------------|
| D3A_WT | 1602 | 61809523  | 61810172  | 2.96 | ZGPAT    | chr20 | + | 24    | NM_181485    |
| D3A_WT | 1602 | 61809523  | 61810172  | 2.96 | ZGPAT    | chr20 | + | 13    | NM_032527    |
| D3A_WT | 616  | 99420799  | 99421228  | 2.53 | ZIC5     | chr13 | - | 1166  | NM_033132    |
| D3A_WT | 855  | 25176662  | 25177026  | 2.48 | ZKSCAN2  | chr16 | - | -488  | NM_001012981 |
| D3A_WT | 258  | 80497312  | 80498960  | 2.33 | ZMIZ1    | chr10 | + | -661  | NM_020338    |
| D3A_WT | 2227 | 44755084  | 44755303  | 3.52 | ZMIZ2    | chr7  | + | -7118 | NM_174929    |
| D3A_WT | 2227 | 44755084  | 44755303  | 3.52 | ZMIZ2    | chr7  | + | 139   | NM_031449    |
| D3A_WT | 102  | 40489896  | 40490445  | 2.24 | ZMPSTE24 | chr1  | + | -6149 | NM_005857    |
| D3A_WT | 2579 | 70390283  | 70390749  | 2.57 | ZMYM3    | chrX  | - | 155   | NM_201599    |
| D3A_WT | 2579 | 70390283  | 70390749  | 2.57 | ZMYM3    | chrX  | - | 632   | NM_005096    |
| D3A_WT | 1279 | 19635250  | 19635374  | 2.76 | ZNF101   | chr19 | + | -5350 | NM_033204    |
| D3A_WT | 1280 | 19704642  | 19705292  | 2.83 | ZNF14    | chr19 | - | -46   | NM_021030    |
| D3A_WT | 1281 | 19711700  | 19711919  | 2.76 | ZNF14    | chr19 | - | -6888 | NM_021030    |
| D3A_WT | 1859 | 320549    | 321566    | 3.16 | ZNF141   | chr4  | + | -538  | NM_003441    |
| D3A_WT | 2409 | 146146814 | 146147065 | 2.44 | ZNF16    | chr8  | - | 139   | NM_006958    |
| D3A_WT | 834  | 3390881   | 3391030   | 2.38 | ZNF174   | chr16 | + | -235  | NM_003450    |
| D3A_WT | 879  | 56587766  | 56590215  | 5.84 | ZNF319   | chr16 | - | 2273  | NM_020807    |
| D3A_WT | 2081 | 26767963  | 26768422  | 2.52 | ZNF322A  | chr6  | - | -250  | NM_024639    |
| D3A_WT | 1386 | 63672483  | 63672834  | 3.38 | ZNF324   | chr19 | + | 2384  | NM_014347    |
| D3A_WT | 1385 | 63655908  | 63657871  | 6.17 | ZNF324B  | chr19 | + | 2107  | NM_207395    |
| D3A_WT | 1354 | 58732950  | 58733684  | 3.82 | ZNF331   | chr19 | + | 173   | NM_001079906 |
| D3A_WT | 1355 | 58749250  | 58749989  | 2.72 | ZNF331   | chr19 | + | -753  | NM_001079907 |
| D3A_WT | 1555 | 31783568  | 31784017  | 2.42 | ZNF341   | chr20 | + | 324   | NM_032819    |
| D3A_WT | 1294 | 42034304  | 42034766  | 2.43 | ZNF345   | chr19 | + | 1429  | NM_003419    |
| D3A_WT | 2053 | 178219512 | 178219781 | 2.04 | ZNF354B  | chr5  | + | 87    | NM_058230    |
| D3A_WT | 486  | 6668300   | 6668737   | 2.7  | ZNF384   | chr12 | - | 419   | NM_001135734 |
| D3A_WT | 486  | 6668300   | 6668737   | 2.7  | ZNF384   | chr12 | - | -432  | NM_001039916 |
| D3A_WT | 486  | 6668300   | 6668737   | 2.7  | ZNF384   | chr12 | - | 412   | NM_001039920 |
| D3A_WT | 486  | 6668300   | 6668737   | 2.7  | ZNF384   | chr12 | - | 270   | NM_001039918 |
| D3A_WT | 1295 | 42260677  | 42260831  | 2.41 | ZNF420   | chr19 | + | -467  | NM_144689    |
| D3A_WT | 1241 | 12007015  | 12007174  | 2.31 | ZNF433   | chr19 | - | 431   | NM_001080411 |
| D3A_WT | 834  | 3390881   | 3391030   | 2.38 | ZNF434   | chr16 | - | 71    | NM_017810    |
| D3A_WT | 1386 | 63672483  | 63672834  | 3.38 | ZNF446   | chr19 | + | -6948 | NM_017908    |
| D3A_WT | 1387 | 63673700  | 63674319  | 3.37 | ZNF446   | chr19 | + | -5597 | NM_017908    |
| D3A_WT | 1388 | 63675170  | 63676119  | 4.15 | ZNF446   | chr19 | + | -3962 | NM_017908    |
| D3A_WT | 1239 | 11769811  | 11769950  | 2.39 | ZNF491   | chr19 | + | -510  | NM_152356    |
| D3A_WT | 1382 | 63571018  | 63571277  | 2.74 | ZNF497   | chr19 | - | -5215 | NM_198458    |
| D3A_WT | 1286 | 37528620  | 37528974  | 2.39 | ZNF507   | chr19 | + | 444   | NM_014910    |
| D3A_WT | 1606 | 62068650  | 62069274  | 2.06 | ZNF512B  | chr20 | - | 2700  | NM_020713    |
| D3A_WT | 2407 | 145994800 | 145995319 | 2.4  | ZNF517   | chr8  | + | -5    | NM_213605    |
| D3A_WT | 1895 | 10067633  | 10067887  | 2.28 | ZNF518B  | chr4  | - | 370   | NM_053042    |
| D3A_WT | 1296 | 42731927  | 42732371  | 2.73 | ZNF540   | chr19 | + | -1998 | NM_152606    |
| D3A_WT | 1191 | 2852898   | 2853529   | 3.12 | ZNF57    | chr19 | + | 1318  | NM_173480    |
| D3A_WT | 1317 | 47264698  | 47265347  | 3.17 | ZNF574   | chr19 | + | -7107 | NM_022752    |
| D3A_WT | 1374 | 61596618  | 61596997  | 3.09 | ZNF582   | chr19 | - | -106  | NM_144690    |
| D3A_WT | 1384 | 63611650  | 63612001  | 2.35 | ZNF584   | chr19 | + | -49   | NM_173548    |
| D3A_WT | 1856 | 42915     | 43094     | 3.07 | ZNF595   | chr4  | + | -222  | NM_182524    |

|        |      |           |           |      |         |       |   |       |              |
|--------|------|-----------|-----------|------|---------|-------|---|-------|--------------|
| D3A_WT | 816  | 1999641   | 1999970   | 2.98 | ZNF598  | chr16 | - | -41   | NM_178167    |
| D3A_WT | 1352 | 57531201  | 57531625  | 2.34 | ZNF610  | chr19 | + | 104   | NM_001161427 |
| D3A_WT | 1772 | 40541312  | 40541976  | 3.24 | ZNF621  | chr3  | + | 265   | NM_198484    |
| D3A_WT | 2386 | 144789617 | 144789761 | 2.43 | ZNF623  | chr8  | + | 174   | NM_001082480 |
| D3A_WT | 566  | 123023736 | 123024285 | 2.89 | ZNF664  | chr12 | + | 388   | NM_152437    |
| D3A_WT | 200  | 225814801 | 225815045 | 2.71 | ZNF678  | chr1  | + | -2943 | NM_178549    |
| D3A_WT | 199  | 225813296 | 225814025 | 4.4  | ZNF678  | chr1  | + | -4206 | NM_178549    |
| D3A_WT | 2408 | 146023987 | 146024121 | 2.43 | ZNF7    | chr8  | + | 348   | NM_003416    |
| D3A_WT | 1684 | 22423282  | 22423428  | 2.34 | ZNF70   | chr22 | - | -76   | NM_021916    |
| D3A_WT | 1375 | 61798635  | 61799659  | 3.75 | ZNF71   | chr19 | + | 672   | NM_021216    |
| D3A_WT | 770  | 88345684  | 88347108  | 3.05 | ZNF710  | chr15 | + | 641   | NM_198526    |
| D3A_WT | 1856 | 42915     | 43094     | 3.07 | ZNF718  | chr4  | + | -272  | NM_001039127 |
| D3A_WT | 2295 | 148952554 | 148952703 | 2.42 | ZNF767  | chr7  | - | 186   | NR_027788    |
| D3A_WT | 2455 | 98656325  | 98656459  | 2.34 | ZNF782  | chr9  | - | -182  | NM_001001662 |
| D3A_WT | 2293 | 148590124 | 148590263 | 2.28 | ZNF783  | chr7  | + | -1    | NR_015357    |
| D3A_WT | 1372 | 60825254  | 60825503  | 3.02 | ZNF784  | chr19 | - | 2375  | NM_203374    |
| D3A_WT | 1940 | 147076736 | 147076985 | 2.35 | ZNF827  | chr4  | - | 2197  | NM_178835    |
| D3A_WT | 2206 | 6621895   | 6622334   | 2.22 | ZNF853  | chr7  | + | 63    | NM_017560    |
| D3A_WT | 1857 | 189930    | 190349    | 2.86 | ZNF876P | chr4  | + | -6249 | NR_027481    |
| D3A_WT | 1858 | 196114    | 196873    | 2.66 | ZNF876P | chr4  | + | 105   | NR_027481    |
| D3A_WT | 1353 | 57565005  | 57565471  | 3.47 | ZNF880  | chr19 | + | 257   | NM_001145434 |
| D3A_WT | 1379 | 63237031  | 63237865  | 3.12 | ZSCAN1  | chr19 | + | 203   | NM_182572    |
| D3A_WT | 1999 | 60662380  | 60664643  | 2.64 | ZSWIM6  | chr5  | + | -345  | NM_020928    |
| D3A_WT | 459  | 113152742 | 113152987 | 2.66 | ZW10    | chr11 | - | -3229 | NM_004724    |
| WT_D3A | 3577 | 76751058  | 76751377  | 2.4  | AATK    | chr17 | - | 3250  | NM_001080395 |
| WT_D3A | 3623 | 989922    | 990166    | 2.8  | ABCA7   | chr19 | + | -1057 | NM_019112    |
| WT_D3A | 3904 | 219792689 | 219793013 | 2.54 | ABCB6   | chr2  | - | -935  | NM_005689    |
| WT_D3A | 3905 | 219796707 | 219796851 | 2.22 | ABCB6   | chr2  | - | -4863 | NM_005689    |
| WT_D3A | 3903 | 219789759 | 219790035 | 2.69 | ABCB6   | chr2  | - | 2019  | NM_005689    |
| WT_D3A | 4498 | 72789487  | 72789721  | 3    | ABHD11  | chr7  | - | 1522  | NM_001145363 |
| WT_D3A | 4498 | 72789487  | 72789721  | 3    | ABHD11  | chr7  | - | 1516  | NM_001145364 |
| WT_D3A | 3435 | 1032008   | 1032247   | 2.76 | ABR     | chr17 | - | -2246 | NM_021962    |
| WT_D3A | 3462 | 7066161   | 7067216   | 4.05 | ACADVL  | chr17 | + | 2812  | NM_001033859 |
| WT_D3A | 2650 | 1240107   | 1240661   | 2.66 | ACAP3   | chr1  | - | -7252 | NM_030649    |
| WT_D3A | 2807 | 15175304  | 15175964  | 2.42 | ACBD7   | chr10 | - | -4853 | NM_001039844 |
| WT_D3A | 4544 | 150369968 | 150370197 | 2.69 | ACCN3   | chr7  | + | -6455 | NM_020322    |
| WT_D3A | 4545 | 150372943 | 150373697 | 2.45 | ACCN3   | chr7  | + | -3217 | NM_020322    |
| WT_D3A | 3913 | 220089070 | 220089604 | 2.91 | ACCN4   | chr2  | + | 2202  | NM_182847    |
| WT_D3A | 3363 | 66253184  | 66253718  | 2.89 | ACD     | chr16 | - | -1232 | NM_022914    |
| WT_D3A | 3528 | 58910865  | 58911414  | 3.29 | ACE     | chr17 | + | 2974  | NM_000789    |
| WT_D3A | 3528 | 58910865  | 58911414  | 3.29 | ACE     | chr17 | + | -4769 | NM_152830    |
| WT_D3A | 4392 | 24776908  | 24777048  | 2.06 | ACOT13  | chr6  | + | 1737  | NM_018473    |
| WT_D3A | 4206 | 49523826  | 49524545  | 3.31 | ACR     | chr22 | + | 668   | NM_001097    |
| WT_D3A | 2836 | 90708269  | 90708633  | 2.3  | ACTA2   | chr10 | - | -5891 | NM_001613    |
| WT_D3A | 3020 | 66065699  | 66067153  | 3.15 | ACTN3   | chr11 | + | -4540 | NM_001104    |
| WT_D3A | 3745 | 43824891  | 43825050  | 2.33 | ACTN4   | chr19 | + | -5196 | NM_004924    |
| WT_D3A | 3083 | 50592723  | 50593072  | 2.79 | ACVRL1  | chr12 | + | 518   | NM_001077401 |

|        |      |           |           |      |          |       |   |       |              |
|--------|------|-----------|-----------|------|----------|-------|---|-------|--------------|
| WT_D3A | 3031 | 67171709  | 67172088  | 2.63 | ACY3     | chr11 | - | 2808  | NM_080658    |
| WT_D3A | 4594 | 39291283  | 39291442  | 2.29 | ADAM5P   | chr8  | + | 24    | NR_001448    |
| WT_D3A | 4746 | 135269210 | 135270101 | 2.94 | ADAMTS13 | chr9  | + | -7285 | NM_139027    |
| WT_D3A | 4747 | 135274139 | 135274678 | 4.21 | ADAMTS13 | chr9  | + | -2532 | NM_139027    |
| WT_D3A | 4746 | 135269210 | 135270101 | 2.94 | ADAMTS13 | chr9  | + | 376   | NR_024514    |
| WT_D3A | 4382 | 178707839 | 178707999 | 2.02 | ADAMTS2  | chr5  | - | -2984 | NM_014244    |
| WT_D3A | 4749 | 135385527 | 135386046 | 2.72 | ADAMTSL2 | chr9  | + | -1320 | NM_001145320 |
| WT_D3A | 4748 | 135383302 | 135384346 | 3.15 | ADAMTSL2 | chr9  | + | -3282 | NM_001145320 |
| WT_D3A | 4749 | 135385527 | 135386046 | 2.72 | ADAMTSL2 | chr9  | + | -4009 | NM_014694    |
| WT_D3A | 4748 | 135383302 | 135384346 | 3.15 | ADAMTSL2 | chr9  | + | -5971 | NM_014694    |
| WT_D3A | 4448 | 963550    | 963719    | 2.28 | ADAP1    | chr7  | - | -2819 | NM_006869    |
| WT_D3A | 3387 | 74220239  | 74220468  | 2.25 | ADAT1    | chr16 | - | -5698 | NM_012091    |
| WT_D3A | 3175 | 23876962  | 23877521  | 2.61 | ADCY4    | chr14 | - | -3537 | NM_139247    |
| WT_D3A | 4205 | 49269628  | 49269957  | 2.64 | ADM2     | chr22 | + | 2915  | NM_024866    |
| WT_D3A | 4204 | 49262421  | 49262580  | 2.5  | ADM2     | chr22 | + | -4377 | NM_024866    |
| WT_D3A | 3615 | 75965435  | 75965784  | 2.39 | ADNP2    | chr18 | + | -2293 | NM_014913    |
| WT_D3A | 3166 | 113151339 | 113151618 | 2.59 | ADPRHL1  | chr13 | - | -20   | NM_199162    |
| WT_D3A | 2714 | 36325463  | 36326422  | 2.94 | ADPRHL2  | chr1  | + | -1097 | NM_017825    |
| WT_D3A | 4367 | 159276548 | 159277297 | 3.02 | ADRA1B   | chr5  | + | 605   | NM_000679    |
| WT_D3A | 4003 | 60308753  | 60309282  | 2.49 | ADRM1    | chr20 | + | -2404 | NM_175573    |
| WT_D3A | 4485 | 44113005  | 44113564  | 2.17 | AEBP1    | chr7  | + | 2800  | NM_001129    |
| WT_D3A | 4405 | 32258062  | 32258942  | 2.4  | AGER     | chr6  | - | 1499  | NM_001136    |
| WT_D3A | 4405 | 32258062  | 32258942  | 2.4  | AGPAT1   | chr6  | - | -6625 | NM_006411    |
| WT_D3A | 4405 | 32258062  | 32258942  | 2.4  | AGPAT1   | chr6  | - | -4682 | NM_032741    |
| WT_D3A | 4779 | 138706511 | 138706760 | 2.84 | AGPAT2   | chr9  | - | -4903 | NM_001012727 |
| WT_D3A | 2788 | 228914294 | 228914441 | 2.28 | AGT      | chr1  | - | 2592  | NM_000029    |
| WT_D3A | 3456 | 6278257   | 6278406   | 2.41 | AIPL1    | chr17 | - | 912   | NM_001033055 |
| WT_D3A | 4080 | 44528910  | 44529044  | 2.59 | AIRE     | chr21 | + | -5724 | NM_000658    |
| WT_D3A | 4079 | 44525722  | 44525941  | 2.78 | AIRE     | chr21 | + | -4359 | NM_000383    |
| WT_D3A | 4080 | 44528910  | 44529044  | 2.59 | AIRE     | chr21 | + | -1213 | NM_000383    |
| WT_D3A | 3688 | 15358011  | 15358454  | 2.07 | AKAP8    | chr19 | - | -6629 | NM_005858    |
| WT_D3A | 3216 | 104330095 | 104330534 | 2.18 | AKT1     | chr14 | - | 2811  | NM_001014431 |
| WT_D3A | 3216 | 104330095 | 104330534 | 2.18 | AKT1     | chr14 | - | 669   | NM_005163    |
| WT_D3A | 3793 | 55077342  | 55077792  | 2.68 | AKT1S1   | chr19 | - | -5177 | NM_032375    |
| WT_D3A | 3791 | 55073257  | 55073411  | 2.25 | AKT1S1   | chr19 | - | -944  | NM_032375    |
| WT_D3A | 3792 | 55075758  | 55076215  | 2.45 | AKT1S1   | chr19 | - | -3596 | NM_032375    |
| WT_D3A | 3793 | 55077342  | 55077792  | 2.68 | AKT1S1   | chr19 | - | -5111 | NM_001098632 |
| WT_D3A | 3791 | 55073257  | 55073411  | 2.25 | AKT1S1   | chr19 | - | -878  | NM_001098632 |
| WT_D3A | 3792 | 55075758  | 55076215  | 2.45 | AKT1S1   | chr19 | - | -3530 | NM_001098632 |
| WT_D3A | 3793 | 55077342  | 55077792  | 2.68 | AKT1S1   | chr19 | - | -5143 | NM_001098633 |
| WT_D3A | 3791 | 55073257  | 55073411  | 2.25 | AKT1S1   | chr19 | - | -910  | NM_001098633 |
| WT_D3A | 3792 | 55075758  | 55076215  | 2.45 | AKT1S1   | chr19 | - | -3562 | NM_001098633 |
| WT_D3A | 3786 | 54645678  | 54646040  | 2.2  | ALDH16A1 | chr19 | + | -2425 | NM_001145396 |
| WT_D3A | 3785 | 54642192  | 54642531  | 2.18 | ALDH16A1 | chr19 | + | -5923 | NM_001145396 |
| WT_D3A | 3032 | 67198713  | 67198862  | 2.63 | ALDH3B2  | chr11 | - | -109  | NM_000695    |
| WT_D3A | 4202 | 48703653  | 48704851  | 2.2  | ALG12    | chr22 | - | -6142 | NM_024105    |
| WT_D3A | 4525 | 101896415 | 101896668 | 3.06 | ALKBH4   | chr7  | - | -4248 | NM_017621    |

|        |      |           |           |      |           |       |   |       |              |
|--------|------|-----------|-----------|------|-----------|-------|---|-------|--------------|
| WT_D3A | 3604 | 54444194  | 54444528  | 2.48 | ALPK2     | chr18 | - | 2808  | NM_052947    |
| WT_D3A | 3466 | 7321445   | 7322819   | 3.18 | AMAC1L3   | chr17 | + | -3312 | NM_001102614 |
| WT_D3A | 4234 | 49729794  | 49730041  | 2.74 | AMIGO3    | chr3  | - | 2325  | NM_198722    |
| WT_D3A | 2739 | 109968600 | 109969779 | 2.27 | AMPD2     | chr1  | + | -382  | NM_203404    |
| WT_D3A | 4791 | 139199421 | 139199660 | 2.63 | ANAPC2    | chr9  | - | 3338  | NM_013366    |
| WT_D3A | 4792 | 139208814 | 139209388 | 2.28 | ANAPC2    | chr9  | - | -6223 | NM_013366    |
| WT_D3A | 4596 | 41641462  | 41642219  | 2.51 | ANK1      | chr8  | - | 121   | NM_020480    |
| WT_D3A | 3878 | 96890010  | 96890159  | 2.36 | ANKRD39   | chr2  | - | -2601 | NM_016466    |
| WT_D3A | 3905 | 219796707 | 219796851 | 2.22 | ANKZF1    | chr2  | + | -5943 | NM_018089    |
| WT_D3A | 3905 | 219796707 | 219796851 | 2.22 | ANKZF1    | chr2  | + | -6074 | NM_001042410 |
| WT_D3A | 3703 | 17312179  | 17312743  | 3.47 | ANO8      | chr19 | - | -5823 | NM_020959    |
| WT_D3A | 3702 | 17304260  | 17305039  | 3.53 | ANO8      | chr19 | - | 1989  | NM_020959    |
| WT_D3A | 2816 | 46592912  | 46594231  | 3.64 | ANXA8     | chr10 | - | 557   | NM_001040084 |
| WT_D3A | 2816 | 46592912  | 46594231  | 3.64 | ANXA8L1   | chr10 | - | 475   | NM_001098845 |
| WT_D3A | 3172 | 23109728  | 23111687  | 3.44 | AP1G2     | chr14 | - | -3588 | NM_003917    |
| WT_D3A | 3643 | 3719330   | 3719559   | 2.29 | APBA3     | chr19 | - | -6771 | NM_004886    |
| WT_D3A | 3628 | 1402171   | 1402500   | 2.38 | APC2      | chr19 | + | 1188  | NM_005883    |
| WT_D3A | 2978 | 56760813  | 56761057  | 2.96 | APLNR     | chr11 | - | 568   | NM_005161    |
| WT_D3A | 4626 | 143696737 | 143697010 | 2.61 | ARC       | chr8  | - | -4038 | NM_015193    |
| WT_D3A | 4627 | 143698361 | 143698904 | 3.29 | ARC       | chr8  | - | -5797 | NM_015193    |
| WT_D3A | 4625 | 143694839 | 143695778 | 3.35 | ARC       | chr8  | - | -2473 | NM_015193    |
| WT_D3A | 4848 | 152850992 | 152851261 | 3.23 | ARD1A     | chrX  | - | 2536  | NM_003491    |
| WT_D3A | 4529 | 127009995 | 127010664 | 3.77 | ARF5      | chr7  | + | -5423 | NM_001662    |
| WT_D3A | 2766 | 159311507 | 159311761 | 2.65 | ARHGAP30  | chr1  | - | -5250 | NM_001025598 |
| WT_D3A | 4848 | 152850992 | 152851261 | 3.23 | ARHGAP4   | chrX  | - | -6218 | NM_001666    |
| WT_D3A | 4847 | 152845196 | 152845345 | 2.15 | ARHGAP4   | chrX  | - | -362  | NM_001666    |
| WT_D3A | 2692 | 17779745  | 17779894  | 2.32 | ARHGEF10L | chr1  | + | 185   | NM_001011722 |
| WT_D3A | 3041 | 72699229  | 72699773  | 2.25 | ARHGEF17  | chr11 | + | 2191  | NM_014786    |
| WT_D3A | 2690 | 16408819  | 16409763  | 2.3  | ARHGEF19  | chr1  | - | 2400  | NM_153213    |
| WT_D3A | 3581 | 77268592  | 77269760  | 2.71 | ARL16     | chr17 | - | -7817 | NM_001040025 |
| WT_D3A | 3351 | 31380647  | 31380771  | 2.27 | ARMC5     | chr16 | + | 2892  | NM_001105247 |
| WT_D3A | 3536 | 70612881  | 70613625  | 2.08 | ARMC7     | chr17 | + | -4423 | NM_024585    |
| WT_D3A | 3448 | 4556188   | 4556719   | 3.9  | ARRB2     | chr17 | + | -4084 | NM_199004    |
| WT_D3A | 4802 | 139618235 | 139618689 | 2.8  | ARRDC1    | chr9  | + | -1454 | NM_152285    |
| WT_D3A | 2698 | 23685423  | 23686192  | 2.65 | ASAP3     | chr1  | - | -2470 | NM_001143778 |
| WT_D3A | 4552 | 150514530 | 150514794 | 2.15 | ASB10     | chr7  | - | 1190  | NM_080871    |
| WT_D3A | 4552 | 150514530 | 150514794 | 2.15 | ASB10     | chr7  | - | 749   | NM_001142460 |
| WT_D3A | 2924 | 2245494   | 2246562   | 2.21 | ASCL2     | chr11 | - | 2730  | NM_005170    |
| WT_D3A | 2925 | 2253023   | 2253672   | 3.39 | ASCL2     | chr11 | - | -4589 | NM_005170    |
| WT_D3A | 4814 | 1673226   | 1673445   | 2.02 | ASMT      | chrX  | + | -1012 | NM_004043    |
| WT_D3A | 3866 | 70041861  | 70042305  | 2.86 | ASPRV1    | chr2  | - | 818   | NM_152792    |
| WT_D3A | 4170 | 38248548  | 38248872  | 2.6  | ATF4      | chr22 | + | 2196  | NM_001675    |
| WT_D3A | 3074 | 6896039   | 6896793   | 2.46 | ATN1      | chr12 | + | -7470 | NM_001007026 |
| WT_D3A | 3230 | 23662682  | 23663426  | 2.32 | ATP10A    | chr15 | - | -3612 | NM_024490    |
| WT_D3A | 2765 | 158411232 | 158411877 | 3.06 | ATP1A4    | chr1  | + | -2270 | NM_001001734 |
| WT_D3A | 4839 | 152457182 | 152457326 | 2.74 | ATP2B3    | chrX  | + | 2481  | NM_001001344 |
| WT_D3A | 3168 | 113367737 | 113368851 | 3.57 | ATP4B     | chr13 | - | -7792 | NM_000705    |

|        |      |           |           |      |           |       |   |       |              |
|--------|------|-----------|-----------|------|-----------|-------|---|-------|--------------|
| WT_D3A | 3627 | 1189714   | 1190158   | 3.56 | ATP5D     | chr19 | + | -2812 | NM_001687    |
| WT_D3A | 3864 | 46605239  | 46606682  | 2.68 | ATP6V1E2  | chr2  | - | -5360 | NM_080653    |
| WT_D3A | 3994 | 54397342  | 54398681  | 3.89 | AURKA     | chr20 | - | 2747  | NM_198437    |
| WT_D3A | 3833 | 62434418  | 62434861  | 2.84 | AURKC     | chr19 | + | 400   | NM_001015878 |
| WT_D3A | 3833 | 62434418  | 62434861  | 2.84 | AURKC     | chr19 | + | 451   | NM_001015879 |
| WT_D3A | 3284 | 349034    | 350383    | 3.52 | AXIN1     | chr16 | - | -7243 | NM_181050    |
| WT_D3A | 2986 | 62146207  | 62146356  | 2.81 | B3GAT3    | chr11 | - | -257  | NM_012200    |
| WT_D3A | 3102 | 121250810 | 121250959 | 2.42 | B3GNT4    | chr12 | + | -3296 | NM_030765    |
| WT_D3A | 3918 | 231961880 | 231962139 | 2.09 | B3GNT7    | chr2  | + | -6569 | NM_145236    |
| WT_D3A | 3755 | 46630852  | 46631326  | 2.71 | B3GNT8    | chr19 | - | -4614 | NM_198540    |
| WT_D3A | 3596 | 78607528  | 78607853  | 2.43 | B3GNTL1   | chr17 | - | -4715 | NM_001009905 |
| WT_D3A | 2724 | 44219701  | 44220750  | 2.35 | B4GALT2   | chr1  | + | 2773  | NM_003780    |
| WT_D3A | 2724 | 44219701  | 44220750  | 2.35 | B4GALT2   | chr1  | + | 1456  | NM_001005417 |
| WT_D3A | 3478 | 19208907  | 19209231  | 2.38 | B9D1      | chr17 | - | -2430 | NM_015681    |
| WT_D3A | 2992 | 63805324  | 63805576  | 2.18 | BAD       | chr11 | - | 3302  | NM_004322    |
| WT_D3A | 2993 | 63812538  | 63813682  | 2.67 | BAD       | chr11 | - | -4358 | NM_004322    |
| WT_D3A | 4623 | 143539878 | 143540342 | 2.3  | BAI1      | chr8  | + | -2268 | NM_001702    |
| WT_D3A | 4624 | 143544181 | 143544540 | 2.95 | BAI1      | chr8  | + | 1982  | NM_001702    |
| WT_D3A | 3573 | 76620445  | 76622159  | 5.5  | BAIAP2    | chr17 | + | -2239 | NM_017451    |
| WT_D3A | 4161 | 36840520  | 36840967  | 2.56 | BAIAP2L2  | chr22 | - | -4121 | NM_025045    |
| WT_D3A | 3019 | 66033138  | 66033372  | 2.2  | BBS1      | chr11 | + | -1439 | NM_024649    |
| WT_D3A | 3461 | 6867512   | 6868345   | 2.16 | BCL6B     | chr17 | + | 836   | NM_181844    |
| WT_D3A | 3460 | 6863195   | 6863828   | 2.98 | BCL6B     | chr17 | + | -3581 | NM_181844    |
| WT_D3A | 3200 | 100111360 | 100111487 | 2.53 | BEGAIN    | chr14 | - | -7263 | NM_001159531 |
| WT_D3A | 3200 | 100111360 | 100111487 | 2.53 | BEGAIN    | chr14 | - | -5539 | NM_020836    |
| WT_D3A | 4107 | 16643489  | 16644260  | 2.52 | BID       | chr22 | - | -6616 | NM_001196    |
| WT_D3A | 4107 | 16643489  | 16644260  | 2.52 | BID       | chr22 | - | -7095 | NM_197966    |
| WT_D3A | 3945 | 242140494 | 242140748 | 2.16 | BOK       | chr2  | + | -6243 | NM_032515    |
| WT_D3A | 4651 | 145492129 | 145492273 | 2.26 | BOP1      | chr8  | - | -6273 | NM_015201    |
| WT_D3A | 4507 | 97745734  | 97746573  | 2.76 | BRI3      | chr7  | + | -2761 | NM_001159491 |
| WT_D3A | 3827 | 60480588  | 60480727  | 2.37 | BRSK1     | chr19 | + | -6688 | NM_032430    |
| WT_D3A | 2987 | 62237808  | 62238440  | 2.55 | BSCL2     | chr11 | - | -6348 | NM_001122955 |
| WT_D3A | 2987 | 62237808  | 62238440  | 2.55 | BSCL2     | chr11 | - | -4502 | NM_001130702 |
| WT_D3A | 3534 | 69876065  | 69876789  | 3.17 | BTBD17    | chr17 | - | -6874 | NM_001080466 |
| WT_D3A | 4395 | 26531348  | 26531667  | 2.56 | BTN2A3    | chr6  | + | 1910  | NR_027795    |
| WT_D3A | 2814 | 44799989  | 44800332  | 2.59 | C10orf10  | chr10 | - | -5824 | NM_007021    |
| WT_D3A | 2813 | 44794552  | 44796490  | 3.49 | C10orf10  | chr10 | - | -1185 | NM_007021    |
| WT_D3A | 2800 | 687108    | 687267    | 2.17 | C10orf108 | chr10 | + | 1171  | NR_027152    |
| WT_D3A | 2800 | 687108    | 687267    | 2.17 | C10orf108 | chr10 | + | 1300  | NR_027151    |
| WT_D3A | 2842 | 102733300 | 102734879 | 2.51 | C10orf2   | chr10 | + | -3193 | NM_021830    |
| WT_D3A | 2828 | 76836430  | 76836583  | 2.34 | C10orf41  | chr10 | + | 2987  | NR_024422    |
| WT_D3A | 2823 | 73207345  | 73207900  | 3.26 | C10orf54  | chr10 | - | -4279 | NM_022153    |
| WT_D3A | 2868 | 134101784 | 134102163 | 2.97 | C10orf91  | chr10 | + | -6730 | NM_173541    |
| WT_D3A | 2962 | 3191895   | 3192164   | 3.27 | C11orf36  | chr11 | + | -4108 | NR_027138    |
| WT_D3A | 3015 | 65439007  | 65439976  | 3.54 | C11orf68  | chr11 | - | 3616  | NM_031450    |
| WT_D3A | 3141 | 110772915 | 110773569 | 3.15 | C13orf16  | chr13 | + | 2227  | NM_152324    |
| WT_D3A | 3185 | 75515821  | 75516344  | 2.67 | C14orf179 | chr14 | + | -5766 | NM_052873    |

|        |      |           |           |      |           |       |   |       |              |
|--------|------|-----------|-----------|------|-----------|-------|---|-------|--------------|
| WT_D3A | 3186 | 75517016  | 75517843  | 3.07 | C14orf179 | chr14 | + | -4419 | NM_052873    |
| WT_D3A | 3211 | 104113228 | 104113762 | 2.51 | C14orf180 | chr14 | + | -3605 | NM_001008404 |
| WT_D3A | 3212 | 104116033 | 104116567 | 3.26 | C14orf180 | chr14 | + | -800  | NM_001008404 |
| WT_D3A | 3177 | 28304431  | 28304557  | 2.41 | C14orf23  | chr14 | + | -7166 | NR_026731    |
| WT_D3A | 3237 | 38424557  | 38424924  | 2.06 | C15orf52  | chr15 | - | -4280 | NM_207380    |
| WT_D3A | 3236 | 38418033  | 38420192  | 3.58 | C15orf52  | chr15 | - | 1348  | NM_207380    |
| WT_D3A | 3268 | 88572057  | 88573222  | 3.37 | C15orf58  | chr15 | + | -5851 | NM_001013657 |
| WT_D3A | 3238 | 38842841  | 38842970  | 2.54 | C15orf62  | chr15 | + | -6545 | NM_001130448 |
| WT_D3A | 3287 | 519855    | 520204    | 2.47 | C16orf10  | chr16 | - | -2621 | NR_024121    |
| WT_D3A | 3341 | 29728578  | 29728817  | 2.56 | C16orf53  | chr16 | + | -6331 | NM_024516    |
| WT_D3A | 3430 | 88245533  | 88246112  | 2.48 | C16orf55  | chr16 | + | -5888 | NM_153025    |
| WT_D3A | 3432 | 88311333  | 88312587  | 4    | C16orf7   | chr16 | - | 2935  | NM_004913    |
| WT_D3A | 3422 | 87748637  | 87749506  | 3.72 | C16orf81  | chr16 | + | -4057 | NR_024347    |
| WT_D3A | 3363 | 66253184  | 66253718  | 2.89 | C16orf86  | chr16 | + | -4766 | NM_001012984 |
| WT_D3A | 3348 | 30684971  | 30685218  | 2    | C16orf93  | chr16 | - | -4051 | NM_001014979 |
| WT_D3A | 3451 | 4741535   | 4741689   | 2.26 | C17orf107 | chr17 | + | -2114 | NM_001145536 |
| WT_D3A | 3495 | 35137541  | 35137685  | 2.4  | C17orf37  | chr17 | - | 2701  | NM_032339    |
| WT_D3A | 3459 | 6854211   | 6854755   | 2.99 | C17orf49  | chr17 | + | -4313 | NM_001142798 |
| WT_D3A | 3455 | 5076155   | 5076714   | 2.77 | C17orf87  | chr17 | - | 2373  | NM_207103    |
| WT_D3A | 3559 | 73651091  | 73651620  | 3.23 | C17orf99  | chr17 | + | -2673 | NM_001163075 |
| WT_D3A | 3627 | 1189714   | 1190158   | 3.56 | C19orf26  | chr19 | - | -946  | NM_152769    |
| WT_D3A | 3742 | 43486559  | 43487123  | 3.74 | C19orf33  | chr19 | + | 198   | NM_033520    |
| WT_D3A | 3674 | 10895716  | 10897465  | 3.14 | C19orf52  | chr19 | + | -3833 | NM_138358    |
| WT_D3A | 3673 | 10893047  | 10893191  | 2.12 | C19orf52  | chr19 | + | -7304 | NM_138358    |
| WT_D3A | 3712 | 18559516  | 18559655  | 2.24 | C19orf60  | chr19 | + | -909  | NM_001100419 |
| WT_D3A | 3652 | 5635519   | 5635983   | 2.28 | C19orf70  | chr19 | - | -3840 | NM_205767    |
| WT_D3A | 3790 | 54885216  | 54885795  | 2.65 | C19orf76  | chr19 | + | 1752  | NM_001101340 |
| WT_D3A | 2755 | 153561778 | 153561927 | 2.87 | C1orf104  | chr1  | - | -1290 | NM_001039517 |
| WT_D3A | 2786 | 226416213 | 226418953 | 4.73 | C1orf69   | chr1  | + | -2468 | NM_001010867 |
| WT_D3A | 2656 | 2119774   | 2120013   | 2.1  | C1orf86   | chr1  | - | -3819 | NM_182533    |
| WT_D3A | 2695 | 22846534  | 22847098  | 2.48 | C1QB      | chr1  | + | -5452 | NM_000491    |
| WT_D3A | 3993 | 54368529  | 54368703  | 2.35 | C20orf108 | chr20 | + | 1227  | NM_080821    |
| WT_D3A | 3964 | 31710896  | 31711030  | 2.21 | C20orf134 | chr20 | + | -7001 | NM_001024675 |
| WT_D3A | 3952 | 2745617   | 2746066   | 3.01 | C20orf141 | chr20 | + | 2185  | NM_080739    |
| WT_D3A | 3964 | 31710896  | 31711030  | 2.21 | C20orf144 | chr20 | + | -2817 | NM_080825    |
| WT_D3A | 3963 | 31709796  | 31710330  | 2.36 | C20orf144 | chr20 | + | -3717 | NM_080825    |
| WT_D3A | 4006 | 60438293  | 60438667  | 2.48 | C20orf151 | chr20 | - | -2496 | NM_080833    |
| WT_D3A | 4014 | 60893803  | 60894637  | 2.76 | C20orf20  | chr20 | + | -4029 | NM_018270    |
| WT_D3A | 3962 | 31217842  | 31219486  | 3.38 | C20orf70  | chr20 | + | -956  | NM_080574    |
| WT_D3A | 4055 | 42403632  | 42405489  | 3    | C21orf128 | chr21 | - | -2847 | NR_027243    |
| WT_D3A | 4101 | 46436033  | 46436297  | 2.93 | C21orf56  | chr21 | - | -7364 | NM_001142854 |
| WT_D3A | 4092 | 45179731  | 45180080  | 2.51 | C21orf70  | chr21 | + | -4477 | NM_058190    |
| WT_D3A | 4071 | 43722564  | 43723138  | 3.23 | C21orf84  | chr21 | - | -320  | NR_026863    |
| WT_D3A | 4085 | 44760058  | 44760582  | 3.04 | C21orf90  | chr21 | + | -1205 | NR_026548    |
| WT_D3A | 4154 | 35735902  | 35737339  | 3.77 | C22orf33  | chr22 | - | -2797 | NM_001163857 |
| WT_D3A | 4180 | 43986144  | 43986463  | 2.16 | C22orf9   | chr22 | - | 708   | NM_015264    |
| WT_D3A | 4181 | 43990763  | 43991536  | 2.93 | C22orf9   | chr22 | - | -4138 | NM_015264    |

|        |      |           |           |      |          |       |   |       |              |
|--------|------|-----------|-----------|------|----------|-------|---|-------|--------------|
| WT_D3A | 3856 | 27284389  | 27284663  | 2.29 | C2orf28  | chr2  | + | -3876 | NM_080592    |
| WT_D3A | 3855 | 27283114  | 27283443  | 2.27 | C2orf28  | chr2  | + | -5124 | NM_080592    |
| WT_D3A | 3938 | 241485651 | 241485998 | 2.82 | C2orf54  | chr2  | - | -1578 | NM_001085437 |
| WT_D3A | 3938 | 241485651 | 241485998 | 2.82 | C2orf54  | chr2  | - | -5699 | NM_024861    |
| WT_D3A | 3861 | 37313144  | 37313533  | 2.58 | C2orf56  | chr2  | + | 1061  | NM_001083946 |
| WT_D3A | 3879 | 98589002  | 98589136  | 2.53 | C2orf64  | chr2  | - | 2318  | NM_001008215 |
| WT_D3A | 3923 | 233442251 | 233442705 | 3.92 | C2orf82  | chr2  | + | -759  | NM_206895    |
| WT_D3A | 4253 | 127759079 | 127759323 | 2.54 | C3orf22  | chr3  | - | 1247  | NM_152533    |
| WT_D3A | 4259 | 135137665 | 135138118 | 2.32 | C3orf36  | chr3  | - | -6545 | NM_025041    |
| WT_D3A | 4240 | 52077689  | 52078534  | 3.05 | C3orf74  | chr3  | - | -3943 | NR_027331    |
| WT_D3A | 4241 | 52079673  | 52080041  | 2.72 | C3orf74  | chr3  | - | -5689 | NR_027331    |
| WT_D3A | 4289 | 1234884   | 1235058   | 2.59 | C4orf42  | chr4  | + | 795   | NM_052861    |
| WT_D3A | 4298 | 3214397   | 3215016   | 3.31 | C4orf44  | chr4  | + | -5858 | NM_001012982 |
| WT_D3A | 4299 | 3216697   | 3217816   | 3.71 | C4orf44  | chr4  | + | -3308 | NM_001012982 |
| WT_D3A | 4309 | 6047115   | 6048092   | 3.56 | C4orf50  | chr4  | - | -6536 | NM_207405    |
| WT_D3A | 4308 | 6042100   | 6042644   | 2.69 | C4orf50  | chr4  | - | -1305 | NM_207405    |
| WT_D3A | 4364 | 157030871 | 157031616 | 3.3  | C5orf52  | chr5  | + | 105   | NM_001145132 |
| WT_D3A | 4415 | 36410856  | 36411220  | 3.24 | C6orf222 | chr6  | - | 1602  | NM_001010903 |
| WT_D3A | 4401 | 31856257  | 31857510  | 2.56 | C6orf27  | chr6  | - | -3796 | NM_025258    |
| WT_D3A | 4535 | 142343376 | 142343625 | 2.56 | C7orf34  | chr7  | + | -3224 | NM_178829    |
| WT_D3A | 4514 | 99595302  | 99596750  | 4.03 | C7orf43  | chr7  | - | -1788 | NM_018275    |
| WT_D3A | 4513 | 99591294  | 99591554  | 2.64 | C7orf43  | chr7  | - | 2814  | NM_018275    |
| WT_D3A | 4533 | 134500910 | 134503757 | 4.83 | C7orf49  | chr7  | - | 3739  | NM_024033    |
| WT_D3A | 4587 | 22515497  | 22515816  | 2.25 | C8orf58  | chr8  | + | 2590  | NM_001013842 |
| WT_D3A | 4586 | 22514097  | 22514341  | 3.43 | C8orf58  | chr8  | + | 1153  | NM_001013842 |
| WT_D3A | 4600 | 58354656  | 58354805  | 2.71 | C8orf71  | chr8  | + | 75    | NR_026772    |
| WT_D3A | 4652 | 145546891 | 145547460 | 2.7  | C8ORFK29 | chr8  | - | 2138  | NR_015428    |
| WT_D3A | 4760 | 137538611 | 137539152 | 3.03 | C9orf116 | chr9  | - | -7299 | NM_001048265 |
| WT_D3A | 4785 | 139001999 | 139002460 | 3.03 | C9orf142 | chr9  | + | -4461 | NM_183241    |
| WT_D3A | 4774 | 138490830 | 138491704 | 3.55 | C9orf163 | chr9  | + | -6500 | NM_152571    |
| WT_D3A | 4796 | 139258179 | 139259513 | 3.02 | C9orf173 | chr9  | + | -6704 | NM_001004353 |
| WT_D3A | 4700 | 124914330 | 124914709 | 3.41 | C9orf45  | chr9  | - | 3058  | NR_026677    |
| WT_D3A | 4745 | 135235305 | 135235539 | 2.31 | C9orf96  | chr9  | + | 2318  | NM_153710    |
| WT_D3A | 3028 | 66976021  | 66976470  | 2.04 | CABP4    | chr11 | + | -3148 | NM_145200    |
| WT_D3A | 3029 | 66978218  | 66979097  | 2.3  | CABP4    | chr11 | + | -736  | NM_145200    |
| WT_D3A | 3491 | 34603225  | 34605199  | 2.66 | CACNB1   | chr17 | - | 3215  | NM_000723    |
| WT_D3A | 2848 | 105204622 | 105204781 | 2.79 | CALHM2   | chr10 | - | -2549 | NM_015916    |
| WT_D3A | 3249 | 66287309  | 66287463  | 2.67 | CALML4   | chr15 | - | -1884 | NM_001031733 |
| WT_D3A | 3694 | 16472937  | 16473285  | 2.47 | CALR3    | chr19 | - | -5108 | NM_145046    |
| WT_D3A | 4362 | 149646406 | 149646565 | 2.52 | CAMK2A   | chr5  | - | 3111  | NM_171825    |
| WT_D3A | 4425 | 44229393  | 44230142  | 3.41 | CAPN11   | chr6  | + | -4758 | NM_007058    |
| WT_D3A | 2703 | 26387517  | 26388881  | 3.05 | CATSPER4 | chr1  | + | -1506 | NM_198137    |
| WT_D3A | 4207 | 8744325   | 8744651   | 2.81 | CAV3     | chr3  | + | -6007 | NM_033337    |
| WT_D3A | 3421 | 87529284  | 87532728  | 4.48 | CBFA2T3  | chr16 | - | 4103  | NM_175931    |
| WT_D3A | 4065 | 43373064  | 43374091  | 2.82 | CBS      | chr21 | - | -4468 | NM_000071    |
| WT_D3A | 3892 | 130813714 | 130813975 | 2.37 | CCDC115  | chr2  | - | 2548  | NM_032357    |
| WT_D3A | 4120 | 20316930  | 20317254  | 3.18 | CCDC116  | chr22 | + | 7     | NM_152612    |



|        |      |           |           |      |          |       |   |       |              |
|--------|------|-----------|-----------|------|----------|-------|---|-------|--------------|
| WT_D3A | 3783 | 54585467  | 54585626  | 2.88 | CCDC155  | chr19 | + | 2229  | NM_144688    |
| WT_D3A | 2762 | 158135792 | 158136614 | 2.32 | CCDC19   | chr1  | - | 327   | NM_012337    |
| WT_D3A | 2668 | 3651468   | 3652527   | 2.35 | CCDC27   | chr1  | + | -6827 | NM_152492    |
| WT_D3A | 3505 | 38201259  | 38201908  | 2.92 | CCDC56   | chr17 | - | 2647  | NM_001040431 |
| WT_D3A | 4247 | 113841398 | 113841557 | 2.14 | CCDC80   | chr3  | - | 1190  | NM_199512    |
| WT_D3A | 4313 | 7102684   | 7103967   | 2.7  | CCDC96   | chr4  | - | -7696 | NM_153376    |
| WT_D3A | 3754 | 46500663  | 46501087  | 3.14 | CCDC97   | chr19 | + | -7058 | NM_052848    |
| WT_D3A | 3486 | 31331843  | 31332493  | 3.06 | CCL16    | chr17 | - | 468   | NM_004590    |
| WT_D3A | 3487 | 31552837  | 31552976  | 2.45 | CCL3L1   | chr17 | - | -4637 | NM_021006    |
| WT_D3A | 3487 | 31552837  | 31552976  | 2.45 | CCL3L3   | chr17 | - | -4646 | NM_001001437 |
| WT_D3A | 3034 | 69158084  | 69158728  | 3.35 | CCND1    | chr11 | + | -6647 | NM_053056    |
| WT_D3A | 4441 | 167449851 | 167450430 | 3.64 | CCR6     | chr6  | + | -6090 | NM_031409    |
| WT_D3A | 4220 | 45901226  | 45901375  | 2.35 | CCR9     | chr3  | + | -1722 | NM_031200    |
| WT_D3A | 4220 | 45901226  | 45901375  | 2.35 | CCR9     | chr3  | + | -1754 | NM_006641    |
| WT_D3A | 3018 | 65838090  | 65838450  | 2.57 | CD248    | chr11 | - | 2821  | NM_020404    |
| WT_D3A | 3535 | 69969022  | 69969769  | 4.21 | CD300A   | chr17 | + | -4721 | NM_007261    |
| WT_D3A | 3530 | 59360386  | 59361120  | 2.49 | CD79B    | chr17 | - | 2683  | NM_021602    |
| WT_D3A | 2927 | 2346623   | 2348042   | 3.6  | CD81     | chr11 | + | -7790 | NM_004356    |
| WT_D3A | 2928 | 2352509   | 2353343   | 4.02 | CD81     | chr11 | + | -2196 | NM_004356    |
| WT_D3A | 3065 | 6177615   | 6179099   | 3.46 | CD9      | chr12 | + | -1458 | NM_001769    |
| WT_D3A | 3071 | 6836178   | 6836325   | 2.16 | CDCA3    | chr12 | - | -5534 | NM_031299    |
| WT_D3A | 3007 | 64611521  | 64612565  | 3.32 | CDCA5    | chr11 | - | -3852 | NM_080668    |
| WT_D3A | 3359 | 64953480  | 64955919  | 4.85 | CDH5     | chr16 | + | -3326 | NM_001795    |
| WT_D3A | 3606 | 61570588  | 61570745  | 2.14 | CDH7     | chr18 | + | 2199  | NM_033646    |
| WT_D3A | 3606 | 61570588  | 61570745  | 2.14 | CDH7     | chr18 | + | 1530  | NM_004361    |
| WT_D3A | 4547 | 150389870 | 150390094 | 2.13 | CDK5     | chr7  | - | -3997 | NM_001164410 |
| WT_D3A | 4546 | 150388770 | 150388905 | 2.31 | CDK5     | chr7  | - | -2852 | NM_001164410 |
| WT_D3A | 3171 | 22658147  | 22659526  | 2.57 | CEBPE    | chr14 | - | -522  | NM_001805    |
| WT_D3A | 3861 | 37313144  | 37313533  | 2.58 | CEBPZ    | chr2  | - | -1094 | NM_005760    |
| WT_D3A | 4106 | 16063444  | 16063626  | 2.19 | CECR1    | chr22 | - | -2990 | NM_177405    |
| WT_D3A | 4737 | 134921211 | 134921435 | 2.61 | CEL      | chr9  | + | -5862 | NM_001807    |
| WT_D3A | 4738 | 134928885 | 134929949 | 2.26 | CEL      | chr9  | + | 2232  | NM_001807    |
| WT_D3A | 3309 | 2526112   | 2526682   | 2.34 | CEMP1    | chr16 | - | -4977 | NM_001048212 |
| WT_D3A | 2884 | 783444    | 783893    | 3.41 | CEND1    | chr11 | - | -3542 | NM_016564    |
| WT_D3A | 3385 | 74026988  | 74027264  | 2.52 | CFDP1    | chr16 | - | -2238 | NM_006324    |
| WT_D3A | 4820 | 47378358  | 47378622  | 2.25 | CFP      | chrX  | - | -3842 | NM_002621    |
| WT_D3A | 4820 | 47378358  | 47378622  | 2.25 | CFP      | chrX  | - | -4177 | NM_001145252 |
| WT_D3A | 3779 | 54215666  | 54216410  | 3.84 | CGB      | chr19 | - | 3367  | NM_000737    |
| WT_D3A | 2672 | 6160427   | 6160976   | 3.83 | CHD5     | chr1  | - | 2069  | NM_015557    |
| WT_D3A | 3431 | 88258327  | 88258730  | 2.69 | CHMP1A   | chr16 | - | -6898 | NM_001083314 |
| WT_D3A | 3231 | 28476892  | 28477031  | 2.39 | CHRFAM7A | chr15 | - | -3805 | NM_139320    |
| WT_D3A | 2988 | 62445823  | 62447262  | 3.23 | CHRM1    | chr11 | - | -954  | NM_000738    |
| WT_D3A | 3921 | 233113305 | 233113464 | 2.91 | CHRNG    | chr2  | + | 704   | NM_005199    |
| WT_D3A | 2825 | 73396058  | 73396382  | 2.33 | CHST3    | chr10 | + | 2095  | NM_004273    |
| WT_D3A | 3386 | 74126299  | 74127625  | 2.6  | CHST5    | chr16 | - | -393  | NM_024533    |
| WT_D3A | 4352 | 80564819  | 80564978  | 2.45 | CKMT2    | chr5  | + | 4     | NM_001099736 |
| WT_D3A | 2687 | 16223943  | 16224372  | 2.75 | CLCNKA   | chr1  | + | 3085  | NM_004070    |

|        |      |           |           |      |           |       |   |       |              |
|--------|------|-----------|-----------|------|-----------|-------|---|-------|--------------|
| WT_D3A | 2689 | 16250487  | 16250636  | 2.15 | CLCNKB    | chr1  | + | 2691  | NM_001165945 |
| WT_D3A | 2722 | 42976730  | 42976879  | 2.52 | CLDN19    | chr1  | - | 1708  | NM_148960    |
| WT_D3A | 3317 | 3015407   | 3015861   | 2.34 | CLDN6     | chr16 | - | -7445 | NM_021195    |
| WT_D3A | 3316 | 3003840   | 3004169   | 2.48 | CLDN9     | chr16 | + | 1547  | NM_020982    |
| WT_D3A | 3377 | 68764618  | 68765698  | 2.59 | CLEC18C   | chr16 | + | -270  | NM_173619    |
| WT_D3A | 3252 | 72688288  | 72689447  | 2.94 | CLK3      | chr15 | + | 1102  | NM_003992    |
| WT_D3A | 3252 | 72688288  | 72689447  | 2.94 | CLK3      | chr15 | + | -5520 | NM_001130028 |
| WT_D3A | 3253 | 72691093  | 72691317  | 3.47 | CLK3      | chr15 | + | -3182 | NM_001130028 |
| WT_D3A | 3076 | 7172040   | 7172399   | 2.14 | CLSTN3    | chr12 | + | -2014 | NM_014718    |
| WT_D3A | 3390 | 80032623  | 80033077  | 3.53 | CMIP      | chr16 | + | -3425 | NM_198390    |
| WT_D3A | 3505 | 38201259  | 38201908  | 2.92 | CNTD1     | chr17 | + | -2796 | NM_173478    |
| WT_D3A | 3750 | 45429854  | 45430103  | 2.55 | CNTD2     | chr19 | - | -5541 | NM_024877    |
| WT_D3A | 3504 | 37967118  | 37967862  | 3.76 | COASY     | chr17 | + | -127  | NM_001042532 |
| WT_D3A | 2710 | 31944166  | 31945293  | 2.86 | COL16A1   | chr1  | - | -2374 | NM_001856    |
| WT_D3A | 4023 | 61390838  | 61392208  | 2.81 | COL20A1   | chr20 | + | -3459 | NM_020882    |
| WT_D3A | 3139 | 109752090 | 109753121 | 3.2  | COL4A2    | chr13 | + | -5026 | NM_001846    |
| WT_D3A | 3663 | 9978952   | 9979416   | 2.4  | COL5A3    | chr19 | - | 2963  | NM_015719    |
| WT_D3A | 4016 | 60920432  | 60920981  | 2.36 | COL9A3    | chr20 | + | 1848  | NM_001853    |
| WT_D3A | 3841 | 3622844   | 3623196   | 2.77 | COLEC11   | chr2  | + | 2509  | NM_024027    |
| WT_D3A | 3840 | 3620439   | 3621063   | 4.28 | COLEC11   | chr2  | + | 240   | NM_024027    |
| WT_D3A | 3715 | 18896208  | 18896443  | 2.24 | COPE      | chr19 | - | -5126 | NM_199444    |
| WT_D3A | 3027 | 66969546  | 66969670  | 2.01 | CORO1B    | chr11 | - | -2049 | NM_020441    |
| WT_D3A | 3027 | 66969546  | 66969670  | 2.01 | CORO1B    | chr11 | - | -1769 | NM_001018070 |
| WT_D3A | 3403 | 84387324  | 84388246  | 2.81 | COX4I1    | chr16 | + | -2911 | NM_001861    |
| WT_D3A | 3403 | 84387324  | 84388246  | 2.81 | COX4NB    | chr16 | - | 2864  | NM_006067    |
| WT_D3A | 3404 | 84394823  | 84395272  | 2.45 | COX4NB    | chr16 | - | -4398 | NM_006067    |
| WT_D3A | 4532 | 129808104 | 129808428 | 3.71 | CPA1      | chr7  | + | 741   | NM_001868    |
| WT_D3A | 4282 | 816470    | 816895    | 2.98 | CPLX1     | chr4  | - | -6737 | NM_006651    |
| WT_D3A | 4654 | 145602633 | 145602992 | 2.31 | CPSF1     | chr8  | - | 2729  | NM_013291    |
| WT_D3A | 3790 | 54885216  | 54885795  | 2.65 | CPT1C     | chr19 | + | -713  | NM_152359    |
| WT_D3A | 3790 | 54885216  | 54885795  | 2.65 | CPT1C     | chr19 | + | -707  | NM_001136052 |
| WT_D3A | 3951 | 2734413   | 2734706   | 2.56 | CPXM1     | chr20 | - | -5277 | NM_019609    |
| WT_D3A | 2775 | 205884942 | 205886209 | 2.8  | CR1L      | chr1  | + | 495   | NM_175710    |
| WT_D3A | 4701 | 125152295 | 125154125 | 3.28 | CRB2      | chr9  | + | -5058 | NM_173689    |
| WT_D3A | 3655 | 6417737   | 6418200   | 3.01 | CRB3      | chr19 | + | 2709  | NM_174881    |
| WT_D3A | 4201 | 48694082  | 48694341  | 2.4  | CRELD2    | chr22 | + | -4075 | NM_024324    |
| WT_D3A | 3397 | 83404214  | 83404378  | 2.5  | CRISPLD2  | chr16 | + | -6791 | NM_031476    |
| WT_D3A | 2691 | 17121831  | 17122585  | 2.69 | CROCC     | chr1  | + | 1177  | NM_014675    |
| WT_D3A | 3897 | 208718727 | 208718871 | 2.42 | CRYGB     | chr2  | - | 323   | NM_005210    |
| WT_D3A | 4361 | 149477326 | 149477675 | 2.25 | CSF1R     | chr5  | - | -4372 | NM_005211    |
| WT_D3A | 3529 | 59311774  | 59311943  | 2.02 | CSH2      | chr17 | - | -7037 | NM_022645    |
| WT_D3A | 4866 | 26036506  | 26036700  | 2.18 | CSPG4LYP1 | chrY  | + | -1839 | NR_001554    |
| WT_D3A | 4866 | 26036506  | 26036700  | 2.18 | CSPG4LYP2 | chrY  | + | -1839 | NR_002194    |
| WT_D3A | 3956 | 23536314  | 23536793  | 2.83 | CST9      | chr20 | - | -1943 | NM_001008693 |
| WT_D3A | 3994 | 54397342  | 54398681  | 3.89 | CSTF1     | chr20 | + | -3102 | NM_001033522 |
| WT_D3A | 3994 | 54397342  | 54398681  | 3.89 | CSTF1     | chr20 | + | -2822 | NM_001033521 |
| WT_D3A | 3994 | 54397342  | 54398681  | 3.89 | CSTF1     | chr20 | + | -2969 | NM_001324    |

|        |      |           |           |      |         |       |   |       |              |
|--------|------|-----------|-----------|------|---------|-------|---|-------|--------------|
| WT_D3A | 4832 | 134763613 | 134764272 | 2.46 | CT45A4  | chrX  | - | 459   | NM_001017436 |
| WT_D3A | 4536 | 143085550 | 143085729 | 2.36 | CTAGE6  | chr7  | - | 137   | NM_178561    |
| WT_D3A | 4289 | 1234884   | 1235058   | 2.59 | CTBP1   | chr4  | - | -2063 | NM_001328    |
| WT_D3A | 2864 | 126711508 | 126711832 | 2.45 | CTBP2   | chr10 | - | -5227 | NM_022802    |
| WT_D3A | 3096 | 56531740  | 56533211  | 4.37 | CTDSP2  | chr12 | - | -5461 | NM_005730    |
| WT_D3A | 3366 | 66522364  | 66522936  | 3.04 | CTRL    | chr16 | - | 616   | NM_001907    |
| WT_D3A | 2896 | 1739000   | 1739769   | 3.26 | CTSD    | chr11 | - | 2414  | NM_001909    |
| WT_D3A | 3659 | 7894030   | 7894494   | 3.09 | CTXN1   | chr19 | - | 2789  | NM_206833    |
| WT_D3A | 4408 | 33491004  | 33491524  | 2.58 | CUTA    | chr6  | - | 2779  | NM_001014433 |
| WT_D3A | 4829 | 70753166  | 70754335  | 2.53 | CXCR3   | chrX  | - | 1342  | NM_001504    |
| WT_D3A | 3052 | 118270002 | 118270231 | 3.3  | CXCR5   | chr11 | + | 806   | NM_032966    |
| WT_D3A | 3053 | 118271087 | 118272128 | 3.02 | CXCR5   | chr11 | + | 2297  | NM_032966    |
| WT_D3A | 3603 | 46066277  | 46067196  | 3.58 | CXXC1   | chr18 | - | 1954  | NM_014593    |
| WT_D3A | 3527 | 58870867  | 58872031  | 4.14 | CYB561  | chr17 | - | 490   | NM_001017917 |
| WT_D3A | 3469 | 7694925   | 7695159   | 3.22 | CYB5D1  | chr17 | + | -6746 | NM_144607    |
| WT_D3A | 3414 | 87249897  | 87250046  | 3.17 | CYBA    | chr16 | - | -5013 | NM_000101    |
| WT_D3A | 3413 | 87245756  | 87245920  | 2.12 | CYBA    | chr16 | - | -880  | NM_000101    |
| WT_D3A | 3895 | 172082461 | 172083107 | 2.67 | CYBRD1  | chr2  | + | -4327 | NM_024843    |
| WT_D3A | 3548 | 72050080  | 72050743  | 2.73 | CYGB    | chr17 | - | -5034 | NM_134268    |
| WT_D3A | 4658 | 145665992 | 145666921 | 2.9  | CYHR1   | chr8  | - | -5230 | NM_138496    |
| WT_D3A | 4658 | 145665992 | 145666921 | 2.9  | CYHR1   | chr8  | - | -4617 | NM_001129888 |
| WT_D3A | 4658 | 145665992 | 145666921 | 2.9  | CYHR1   | chr8  | - | -4799 | NM_032687    |
| WT_D3A | 4218 | 42897634  | 42897883  | 2.49 | CYP8B1  | chr3  | - | -5121 | NM_004391    |
| WT_D3A | 4696 | 123541999 | 123542343 | 2.53 | DAB2IP  | chr9  | + | -2713 | NM_138709    |
| WT_D3A | 4695 | 123368414 | 123368749 | 2.7  | DAB2IP  | chr9  | + | -638  | NM_032552    |
| WT_D3A | 2982 | 61206811  | 61206960  | 2.65 | DAGLA   | chr11 | + | 2400  | NM_006133    |
| WT_D3A | 3644 | 3917883   | 3918132   | 2.26 | DAPK3   | chr19 | - | 2819  | NM_001348    |
| WT_D3A | 4407 | 33395469  | 33397328  | 3.32 | DAXX    | chr6  | - | 2373  | NM_001141970 |
| WT_D3A | 4324 | 41679361  | 41679680  | 2.54 | DCAF4L1 | chr4  | + | 1051  | NM_001029955 |
| WT_D3A | 3585 | 77586612  | 77587191  | 2.41 | DCXR    | chr17 | - | 1961  | NM_016286    |
| WT_D3A | 2981 | 60862236  | 60862407  | 2.3  | DDB1    | chr11 | - | -5079 | NM_001923    |
| WT_D3A | 2694 | 20863307  | 20864055  | 2.71 | DDOST   | chr1  | - | -3057 | NM_005216    |
| WT_D3A | 4398 | 30965672  | 30966291  | 2.45 | DDR1    | chr6  | + | 1538  | NM_013994    |
| WT_D3A | 4162 | 37215329  | 37215463  | 2.7  | DDX17   | chr22 | - | -915  | NM_030881    |
| WT_D3A | 4374 | 176873876 | 176874010 | 2.2  | DDX41   | chr5  | - | 2630  | NM_016222    |
| WT_D3A | 3115 | 131196408 | 131196672 | 2.58 | DDX51   | chr12 | - | -1707 | NM_175066    |
| WT_D3A | 4413 | 35367293  | 35367722  | 2.2  | DEF6    | chr6  | + | -6065 | NM_022047    |
| WT_D3A | 4576 | 6722678   | 6723312   | 3.74 | DEFB1   | chr8  | - | -56   | NM_005218    |
| WT_D3A | 4609 | 142201905 | 142202354 | 2.56 | DENND3  | chr8  | + | -5772 | NM_014957    |
| WT_D3A | 4116 | 18684585  | 18685044  | 2.18 | DGCR6L  | chr22 | - | 2794  | NM_033257    |
| WT_D3A | 3924 | 233926606 | 233927065 | 2.8  | DGKD    | chr2  | + | -1056 | NM_152879    |
| WT_D3A | 2975 | 46341924  | 46342803  | 4.22 | DGKZ    | chr11 | + | 2643  | NM_001105540 |
| WT_D3A | 3680 | 12659454  | 12659903  | 2.43 | DHPS    | chr19 | - | -6001 | NM_013407    |
| WT_D3A | 3382 | 70687882  | 70688409  | 2.5  | DHX38   | chr16 | + | 3030  | NM_014003    |
| WT_D3A | 4597 | 42353363  | 42354437  | 3.96 | DKK4    | chr8  | - | -69   | NM_014420    |
| WT_D3A | 3782 | 54551964  | 54552738  | 3.01 | DKKL1   | chr19 | + | -6502 | NM_014419    |
| WT_D3A | 3462 | 7066161   | 7067216   | 4.05 | DLG4    | chr17 | - | -5036 | NM_001128827 |

|        |      |           |           |      |          |       |   |       |              |
|--------|------|-----------|-----------|------|----------|-------|---|-------|--------------|
| WT_D3A | 3462 | 7066161   | 7067216   | 4.05 | DLG4     | chr17 | - | -2595 | NM_001365    |
| WT_D3A | 2856 | 124311879 | 124312028 | 2.28 | DMBT1    | chr10 | + | 1783  | NM_004406    |
| WT_D3A | 3734 | 40681779  | 40682131  | 2.46 | DMKN     | chr19 | - | 2698  | NM_001035516 |
| WT_D3A | 3768 | 50973411  | 50973570  | 2.63 | DMPK     | chr19 | - | 2211  | NM_001081563 |
| WT_D3A | 3767 | 50972321  | 50972785  | 2.42 | DMPK     | chr19 | - | 3148  | NM_001081563 |
| WT_D3A | 4527 | 102770969 | 102771198 | 2.21 | DNAJC2   | chr7  | - | 1473  | NM_001129887 |
| WT_D3A | 2991 | 63747212  | 63748069  | 2.43 | DNAJC4   | chr11 | + | -6688 | NM_005528    |
| WT_D3A | 4030 | 61991823  | 61992252  | 3.15 | DNAJC5   | chr20 | + | -4924 | NM_025219    |
| WT_D3A | 3320 | 3636874   | 3637013   | 2.77 | DNASE1   | chr16 | + | -5997 | NM_005223    |
| WT_D3A | 4855 | 153299717 | 153300063 | 2.39 | DNASE1L1 | chrX  | - | -6269 | NM_001009934 |
| WT_D3A | 3681 | 12856456  | 12856895  | 2.41 | DNASE2   | chr19 | - | -3340 | NM_001375    |
| WT_D3A | 3850 | 25332208  | 25332741  | 2.33 | DNMT3A   | chr2  | - | -3790 | NM_153759    |
| WT_D3A | 3908 | 219959390 | 219959724 | 2.7  | DNPEP    | chr2  | - | 1349  | NM_012100    |
| WT_D3A | 3676 | 11236051  | 11238529  | 3.92 | DOCK6    | chr19 | - | -3133 | NM_020812    |
| WT_D3A | 4374 | 176873876 | 176874010 | 2.2  | DOK3     | chr5  | - | -4479 | NM_024872    |
| WT_D3A | 4374 | 176873876 | 176874010 | 2.2  | DOK3     | chr5  | - | -3910 | NM_001144876 |
| WT_D3A | 4304 | 3432266   | 3432695   | 2.4  | DOK7     | chr4  | + | -2350 | NM_173660    |
| WT_D3A | 4403 | 32045530  | 32045979  | 2.55 | DOM3Z    | chr6  | - | 2257  | NM_005510    |
| WT_D3A | 3429 | 88208201  | 88208350  | 2.51 | DPEP1    | chr16 | + | -6225 | NM_004413    |
| WT_D3A | 3429 | 88208201  | 88208350  | 2.51 | DPEP1    | chr16 | + | 1059  | NM_001128141 |
| WT_D3A | 4017 | 60942287  | 60942746  | 2.26 | DPH3B    | chr20 | + | -4404 | NM_080750    |
| WT_D3A | 3015 | 65439007  | 65439976  | 3.54 | DRAP1    | chr11 | + | -3812 | NM_006442    |
| WT_D3A | 3896 | 183645034 | 183645513 | 2.91 | DUSP19   | chr2  | + | -6258 | NM_001142314 |
| WT_D3A | 4591 | 33574336  | 33574820  | 3.54 | DUSP26   | chr8  | - | 2403  | NM_024025    |
| WT_D3A | 4435 | 158988520 | 158988769 | 2.68 | DYNLT1   | chr6  | - | -2916 | NM_006519    |
| WT_D3A | 3749 | 45022643  | 45022787  | 2.1  | DYRK1B   | chr19 | - | -6034 | NM_006483    |
| WT_D3A | 4366 | 158457308 | 158458141 | 2.82 | EBF1     | chr5  | - | 1642  | NM_024007    |
| WT_D3A | 4821 | 48258692  | 48259126  | 2.38 | EBP      | chrX  | + | -6198 | NM_006579    |
| WT_D3A | 3919 | 233064295 | 233064550 | 2.03 | ECEL1    | chr2  | - | -3646 | NM_004826    |
| WT_D3A | 3920 | 233065691 | 233066756 | 2.86 | ECEL1    | chr2  | - | -5447 | NM_004826    |
| WT_D3A | 3746 | 44020763  | 44020888  | 2.16 | ECH1     | chr19 | - | -6488 | NM_001398    |
| WT_D3A | 2720 | 41720098  | 41720367  | 2.54 | EDN2     | chr1  | - | 2699  | NM_001956    |
| WT_D3A | 4213 | 19950205  | 19950629  | 4.11 | EFHB     | chr3  | - | 293   | NM_144715    |
| WT_D3A | 4330 | 111050615 | 111050881 | 3.1  | EGF      | chr4  | + | -2740 | NM_001963    |
| WT_D3A | 4803 | 139626474 | 139626748 | 2.68 | EHMT1    | chr9  | + | -6653 | NM_024757    |
| WT_D3A | 4804 | 139629004 | 139629523 | 3.21 | EHMT1    | chr9  | + | -4001 | NM_024757    |
| WT_D3A | 3857 | 27452126  | 27453351  | 2.21 | EIF2B4   | chr2  | - | -5910 | NM_015636    |
| WT_D3A | 3857 | 27452126  | 27453351  | 2.21 | EIF2B4   | chr2  | - | -6315 | NM_172195    |
| WT_D3A | 4152 | 35260349  | 35260486  | 2.64 | EIF3D    | chr22 | - | -5194 | NM_003753    |
| WT_D3A | 2770 | 200247728 | 200248462 | 2.42 | ELF3     | chr1  | + | 1783  | NM_004433    |
| WT_D3A | 2773 | 203874146 | 203875074 | 4.29 | ELK4     | chr1  | - | -5987 | NM_001973    |
| WT_D3A | 3246 | 41856921  | 41857370  | 2.66 | ELL3     | chr15 | - | -351  | NM_025165    |
| WT_D3A | 4499 | 73073898  | 73074537  | 3.02 | ELN      | chr7  | + | -6145 | NM_001081752 |
| WT_D3A | 4500 | 73075903  | 73076452  | 2.79 | ELN      | chr7  | + | -4185 | NM_001081752 |
| WT_D3A | 3975 | 39426422  | 39426971  | 3.16 | EMILIN3  | chr20 | - | 2216  | NM_052846    |
| WT_D3A | 4707 | 129662855 | 129663281 | 2.77 | ENG      | chr9  | - | -6200 | NM_001114753 |
| WT_D3A | 3074 | 6896039   | 6896793   | 2.46 | ENO2     | chr12 | + | 2542  | NM_001975    |

|        |      |           |           |      |         |       |   |       |              |
|--------|------|-----------|-----------|------|---------|-------|---|-------|--------------|
| WT_D3A | 3113 | 130995565 | 130995919 | 2.81 | EP400   | chr12 | + | -4718 | NM_015409    |
| WT_D3A | 4582 | 21964815  | 21965488  | 3.24 | EPB49   | chr8  | + | -1875 | NM_001114137 |
| WT_D3A | 4582 | 21964815  | 21965488  | 3.24 | EPB49   | chr8  | + | -3122 | NM_001114139 |
| WT_D3A | 4583 | 21970936  | 21972681  | 3.5  | EPB49   | chr8  | + | 3535  | NM_001114139 |
| WT_D3A | 4582 | 21964815  | 21965488  | 3.24 | EPB49   | chr8  | + | -6170 | NM_001114135 |
| WT_D3A | 4583 | 21970936  | 21972681  | 3.5  | EPB49   | chr8  | + | 487   | NM_001114135 |
| WT_D3A | 4582 | 21964815  | 21965488  | 3.24 | EPB49   | chr8  | + | -7480 | NM_001114138 |
| WT_D3A | 4583 | 21970936  | 21972681  | 3.5  | EPB49   | chr8  | + | -823  | NM_001114138 |
| WT_D3A | 4642 | 145021067 | 145021216 | 2.05 | EPPK1   | chr8  | - | -1719 | NM_031308    |
| WT_D3A | 2883 | 693433    | 693897    | 3.32 | EPS8L2  | chr11 | + | -2454 | NM_022772    |
| WT_D3A | 3658 | 7803952   | 7804211   | 2.52 | EVI5L   | chr19 | + | 2921  | NM_145245    |
| WT_D3A | 3378 | 68844668  | 68846491  | 2.9  | EXOSC6  | chr16 | - | -2245 | NM_058219    |
| WT_D3A | 3379 | 68849230  | 68849563  | 2.14 | EXOSC6  | chr16 | - | -6062 | NM_058219    |
| WT_D3A | 3163 | 112823498 | 112823632 | 2.54 | F10     | chr13 | + | -1548 | NM_000504    |
| WT_D3A | 3164 | 112826681 | 112826840 | 2.09 | F10     | chr13 | + | 1647  | NM_000504    |
| WT_D3A | 4183 | 44086099  | 44086248  | 2.11 | FAM118A | chr22 | + | 1725  | NM_017911    |
| WT_D3A | 4183 | 44086099  | 44086248  | 2.11 | FAM118A | chr22 | + | 2429  | NM_001104595 |
| WT_D3A | 4796 | 139258179 | 139259513 | 3.02 | FAM166A | chr9  | - | 3197  | NM_001001710 |
| WT_D3A | 3189 | 93451828  | 93452162  | 2.54 | FAM181A | chr14 | + | -3015 | NM_138344    |
| WT_D3A | 4196 | 47344314  | 47344638  | 2.45 | FAM19A5 | chr22 | + | -6305 | NM_015381    |
| WT_D3A | 4443 | 282523    | 284247    | 2.41 | FAM20C  | chr7  | + | -4666 | NM_020223    |
| WT_D3A | 2702 | 26013784  | 26013963  | 2.45 | FAM54B  | chr1  | + | -5110 | NM_001099625 |
| WT_D3A | 2702 | 26013784  | 26013963  | 2.45 | FAM54B  | chr1  | + | -5397 | NM_019557    |
| WT_D3A | 2702 | 26013784  | 26013963  | 2.45 | FAM54B  | chr1  | + | -6032 | NM_001099626 |
| WT_D3A | 4841 | 152514852 | 152514981 | 2.31 | FAM58A  | chrX  | - | 2910  | NM_152274    |
| WT_D3A | 4780 | 138723978 | 138724412 | 2.98 | FAM69B  | chr9  | + | -2649 | NM_152421    |
| WT_D3A | 3169 | 113656646 | 113656975 | 2.94 | FAM70B  | chr13 | - | -4937 | NM_182614    |
| WT_D3A | 4674 | 65233568  | 65234027  | 2.68 | FAM74A4 | chr9  | - | 409   | NR_026802    |
| WT_D3A | 4670 | 39347664  | 39348498  | 2.67 | FAM75A1 | chr9  | + | 2383  | NM_001085452 |
| WT_D3A | 4670 | 39347664  | 39348498  | 2.67 | FAM75A2 | chr9  | + | 2383  | NM_001040065 |
| WT_D3A | 4732 | 133145950 | 133146283 | 2.96 | FAM78A  | chr9  | - | -4389 | NM_033387    |
| WT_D3A | 4605 | 124265956 | 124266300 | 3.28 | FAM83A  | chr8  | + | 2196  | NM_207006    |
| WT_D3A | 4604 | 124262754 | 124262883 | 2.69 | FAM83A  | chr8  | + | -1114 | NM_207006    |
| WT_D3A | 3967 | 33349852  | 33350496  | 3.95 | FAM83C  | chr20 | - | -6535 | NM_178468    |
| WT_D3A | 3966 | 33345557  | 33345986  | 3.16 | FAM83C  | chr20 | - | -2132 | NM_178468    |
| WT_D3A | 3775 | 53809115  | 53809764  | 2.42 | FAM83E  | chr19 | - | -933  | NM_017708    |
| WT_D3A | 3263 | 87587456  | 87587744  | 2.35 | FANCI   | chr15 | + | -597  | NM_018193    |
| WT_D3A | 3587 | 77654264  | 77654413  | 2.21 | FASN    | chr17 | - | -4943 | NM_004104    |
| WT_D3A | 4686 | 96443044  | 96443488  | 3.17 | FBP1    | chr9  | - | -914  | NM_001127628 |
| WT_D3A | 4686 | 96443044  | 96443488  | 3.17 | FBP1    | chr9  | - | -1522 | NM_000507    |
| WT_D3A | 3346 | 30585529  | 30586658  | 3.9  | FBRS    | chr16 | + | 2815  | NM_001105079 |
| WT_D3A | 2846 | 104166905 | 104167069 | 2.42 | FBXL15  | chr10 | + | -2573 | NM_024326    |
| WT_D3A | 3349 | 30845446  | 30845591  | 2.35 | FBXL19  | chr16 | + | 2122  | NM_001099784 |
| WT_D3A | 4653 | 145557456 | 145557787 | 2.64 | FBXL6   | chr8  | - | -4681 | NM_024555    |
| WT_D3A | 4517 | 100018591 | 100020356 | 3.46 | FBXO24  | chr7  | + | -5658 | NM_012172    |
| WT_D3A | 4517 | 100018591 | 100020356 | 3.46 | FBXO24  | chr7  | + | -2418 | NM_033506    |
| WT_D3A | 4516 | 100016513 | 100016938 | 2.92 | FBXO24  | chr7  | + | -5166 | NM_033506    |

|        |      |           |           |      |          |       |   |       |              |
|--------|------|-----------|-----------|------|----------|-------|---|-------|--------------|
| WT_D3A | 3657 | 7674397   | 7674636   | 2.14 | FCER2    | chr19 | - | -1484 | NM_002002    |
| WT_D3A | 4360 | 141008842 | 141009586 | 2.9  | FCHSD1   | chr5  | - | 1956  | NM_033449    |
| WT_D3A | 4759 | 136911680 | 136912559 | 3.64 | FCN2     | chr9  | + | -359  | NM_015837    |
| WT_D3A | 2761 | 158031760 | 158032407 | 3.57 | FCRL6    | chr1  | + | -6713 | NM_001004310 |
| WT_D3A | 2984 | 61309768  | 61310202  | 2.47 | FEN1     | chr11 | + | -6740 | NM_004111    |
| WT_D3A | 4682 | 94778813  | 94779052  | 2.72 | FGD3     | chr9  | + | 2394  | NM_033086    |
| WT_D3A | 4681 | 94777205  | 94777484  | 2.36 | FGD3     | chr9  | + | 806   | NM_033086    |
| WT_D3A | 4680 | 94751104  | 94751283  | 2.55 | FGD3     | chr9  | + | 1772  | NM_001083536 |
| WT_D3A | 4323 | 15573535  | 15573779  | 3.18 | FGFBP2   | chr4  | - | 300   | NM_031950    |
| WT_D3A | 4292 | 1761834   | 1762496   | 2.81 | FGFR3    | chr4  | + | -2671 | NM_022965    |
| WT_D3A | 4285 | 988573    | 988722    | 2.28 | FGFRL1   | chr4  | + | -6962 | NM_001004356 |
| WT_D3A | 4285 | 988573    | 988722    | 2.28 | FGFRL1   | chr4  | + | -7112 | NM_001004358 |
| WT_D3A | 2769 | 178432175 | 178432524 | 2.84 | FLJ23867 | chr1  | + | -1417 | NR_026900    |
| WT_D3A | 3691 | 16008149  | 16008298  | 2.23 | FLJ25328 | chr19 | + | 2701  | NR_024335    |
| WT_D3A | 3690 | 15996166  | 15997325  | 3.36 | FLJ25328 | chr19 | + | -7540 | NR_024336    |
| WT_D3A | 2640 | 845694    | 845938    | 2.49 | FLJ39609 | chr1  | - | -1136 | NR_026874    |
| WT_D3A | 3765 | 50689743  | 50689987  | 2.59 | FLJ40125 | chr19 | + | -3705 | NM_001080401 |
| WT_D3A | 4806 | 139776926 | 139777050 | 2.46 | FLJ40292 | chr9  | + | -306  | NR_024341    |
| WT_D3A | 3310 | 2623649   | 2624263   | 3.26 | FLJ42627 | chr16 | + | -5027 | NR_024492    |
| WT_D3A | 3573 | 76620445  | 76622159  | 5.5  | FLJ90757 | chr17 | - | 1812  | NR_026857    |
| WT_D3A | 2990 | 63622170  | 63622314  | 2.31 | FLRT1    | chr11 | + | -5695 | NM_013280    |
| WT_D3A | 3787 | 54671198  | 54671652  | 2.16 | FLT3LG   | chr19 | + | 2128  | NM_001459    |
| WT_D3A | 2779 | 211100353 | 211101222 | 2.83 | FLVCR1   | chr1  | + | 2568  | NM_014053    |
| WT_D3A | 3593 | 78264208  | 78264447  | 2.7  | FN3KRP   | chr17 | + | -3543 | NM_024619    |
| WT_D3A | 3594 | 78269526  | 78270046  | 3.11 | FN3KRP   | chr17 | + | 1916  | NM_024619    |
| WT_D3A | 2712 | 33106167  | 33106586  | 2.48 | FNDC5    | chr1  | - | 2558  | NM_153756    |
| WT_D3A | 4672 | 42708164  | 42709352  | 2.38 | FOXD4L2  | chr9  | + | 1529  | NM_001099279 |
| WT_D3A | 4672 | 42708164  | 42709352  | 2.38 | FOXD4L4  | chr9  | + | 1529  | NM_199244    |
| WT_D3A | 3177 | 28304431  | 28304557  | 2.41 | FOXG1    | chr14 | + | -1543 | NM_005249    |
| WT_D3A | 4473 | 4683886   | 4685326   | 3.35 | FOXK1    | chr7  | + | -3849 | NM_001037165 |
| WT_D3A | 4728 | 131976081 | 131976360 | 2.48 | FREQ     | chr9  | + | 1543  | NM_014286    |
| WT_D3A | 3009 | 64903526  | 64903780  | 2.64 | FRMD8    | chr11 | + | -6963 | NM_031904    |
| WT_D3A | 3620 | 624630    | 624774    | 2.43 | FSTL3    | chr19 | + | -2686 | NM_005860    |
| WT_D3A | 3621 | 626135    | 626264    | 2.7  | FSTL3    | chr19 | + | -1189 | NM_005860    |
| WT_D3A | 4100 | 46398642  | 46398971  | 3.51 | FTCD     | chr21 | - | 1103  | NM_206965    |
| WT_D3A | 4465 | 2245332   | 2245596   | 2.45 | FTSJ2    | chr7  | - | 2895  | NM_013393    |
| WT_D3A | 3269 | 89209901  | 89210776  | 3.44 | FURIN    | chr15 | + | -2550 | NM_002569    |
| WT_D3A | 3731 | 40322197  | 40322351  | 2.53 | FXYP1    | chr19 | + | 43    | NM_005031    |
| WT_D3A | 3731 | 40322197  | 40322351  | 2.53 | FXYP1    | chr19 | + | 703   | NM_021902    |
| WT_D3A | 3731 | 40322197  | 40322351  | 2.53 | FXYP7    | chr19 | + | -3719 | NM_022006    |
| WT_D3A | 3641 | 3469465   | 3469604   | 2.02 | FZR1     | chr19 | + | -4419 | NM_001136197 |
| WT_D3A | 3543 | 71270371  | 71270525  | 2.17 | GALK1    | chr17 | - | 2427  | NM_000154    |
| WT_D3A | 3417 | 87456188  | 87456437  | 2.44 | GALNS    | chr16 | - | -5437 | NM_000512    |
| WT_D3A | 3116 | 131261923 | 131262168 | 2.14 | GALNT9   | chr12 | - | -5519 | NM_021808    |
| WT_D3A | 4159 | 36549448  | 36549987  | 2.29 | GALR3    | chr22 | + | 383   | NM_003614    |
| WT_D3A | 4008 | 60487731  | 60488080  | 2.56 | GATA5    | chr20 | - | -3484 | NM_080473    |
| WT_D3A | 4007 | 60481851  | 60482178  | 2.19 | GATA5    | chr20 | - | 2407  | NM_080473    |

|        |      |           |           |      |         |       |   |       |              |
|--------|------|-----------|-----------|------|---------|-------|---|-------|--------------|
| WT_D3A | 4139 | 29012632  | 29012981  | 2.79 | GATSL3  | chr22 | - | 2810  | NM_001037666 |
| WT_D3A | 4529 | 127009995 | 127010664 | 3.77 | GCC1    | chr7  | - | 2561  | NM_024523    |
| WT_D3A | 3681 | 12856456  | 12856895  | 2.41 | GCDH    | chr19 | + | -6298 | NM_013976    |
| WT_D3A | 3238 | 38842841  | 38842970  | 2.54 | GCHFR   | chr15 | + | -671  | NM_005258    |
| WT_D3A | 4827 | 69561847  | 69562066  | 2.31 | GDPD2   | chrX  | + | 2241  | NM_017711    |
| WT_D3A | 3509 | 40351311  | 40352012  | 2.61 | GFAP    | chr17 | - | -3221 | NM_002055    |
| WT_D3A | 3537 | 70775403  | 70776047  | 4.03 | GGA3    | chr17 | - | -6453 | NM_014001    |
| WT_D3A | 3447 | 4411094   | 4411234   | 2.28 | GGT6    | chr17 | - | -539  | NM_153338    |
| WT_D3A | 3529 | 59311774  | 59311943  | 2.02 | GH2     | chr17 | - | 1097  | NM_022558    |
| WT_D3A | 4520 | 100122185 | 100123019 | 2.1  | GIGYF1  | chr7  | - | 2204  | NM_022574    |
| WT_D3A | 3907 | 219824755 | 219825314 | 2.62 | GLB1L   | chr2  | - | -6659 | NM_024506    |
| WT_D3A | 3906 | 219816068 | 219816729 | 3.47 | GLB1L   | chr2  | - | 1977  | NM_024506    |
| WT_D3A | 4711 | 130300587 | 130301021 | 2.27 | GLE1    | chr9  | + | -5987 | NM_001003722 |
| WT_D3A | 4667 | 36129133  | 36129302  | 2.76 | GLIPR2  | chr9  | + | 2476  | NM_022343    |
| WT_D3A | 3722 | 19621224  | 19621678  | 2.28 | GMIP    | chr19 | - | -5996 | NM_016573    |
| WT_D3A | 3912 | 220065945 | 220066899 | 2.7  | GMPPA   | chr2  | + | -5434 | NM_013335    |
| WT_D3A | 3912 | 220065945 | 220066899 | 2.7  | GMPPA   | chr2  | + | -5450 | NM_205847    |
| WT_D3A | 4235 | 49739998  | 49740661  | 2.01 | GMPPB   | chr3  | - | -3941 | NM_013334    |
| WT_D3A | 3637 | 3046438   | 3046662   | 2.44 | GNA11   | chr19 | + | 1143  | NM_002067    |
| WT_D3A | 2738 | 109887264 | 109888816 | 3.74 | GNAI3   | chr1  | + | -4668 | NM_006496    |
| WT_D3A | 4519 | 100103045 | 100103701 | 4.01 | GNB2    | chr7  | + | -5925 | NM_005273    |
| WT_D3A | 3289 | 793374    | 793723    | 2.82 | GNG13   | chr16 | - | -2814 | NM_016541    |
| WT_D3A | 3771 | 51832192  | 51832636  | 3.6  | GNG8    | chr19 | - | -2635 | NM_033258    |
| WT_D3A | 3292 | 1337068   | 1337287   | 3.04 | GNPTG   | chr16 | + | -4755 | NM_032520    |
| WT_D3A | 3122 | 131919584 | 131919829 | 2.17 | GOLGA3  | chr12 | - | -4345 | NM_005895    |
| WT_D3A | 4453 | 1090379   | 1091018   | 3.3  | GPER    | chr7  | + | -3550 | NM_001098201 |
| WT_D3A | 4453 | 1090379   | 1091018   | 3.3  | GPER    | chr7  | + | -2270 | NM_001505    |
| WT_D3A | 4631 | 144365976 | 144367095 | 3.37 | GPIHBP1 | chr8  | + | 93    | NM_178172    |
| WT_D3A | 4822 | 48865423  | 48865575  | 2.08 | GPKOW   | chrX  | - | 1524  | NM_015698    |
| WT_D3A | 4246 | 101806740 | 101807114 | 2.18 | GPR128  | chr3  | + | -4195 | NM_032787    |
| WT_D3A | 3220 | 104603522 | 104605041 | 3.23 | GPR132  | chr14 | - | -1482 | NM_013345    |
| WT_D3A | 2992 | 63805324  | 63805576  | 2.18 | GPR137  | chr11 | + | -4456 | NM_020155    |
| WT_D3A | 2993 | 63812538  | 63813682  | 2.67 | GPR137  | chr11 | + | 3204  | NM_020155    |
| WT_D3A | 3534 | 69876065  | 69876789  | 3.17 | GPR142  | chr17 | + | 1188  | NM_181790    |
| WT_D3A | 4452 | 1060458   | 1060692   | 2.26 | GPR146  | chr7  | + | -3091 | NM_138445    |
| WT_D3A | 3028 | 66976021  | 66976470  | 2.04 | GPR152  | chr11 | - | 531   | NM_206997    |
| WT_D3A | 3029 | 66978218  | 66979097  | 2.3  | GPR152  | chr11 | - | -1881 | NM_206997    |
| WT_D3A | 2673 | 6246015   | 6246539   | 2.47 | GPR153  | chr1  | - | -2655 | NM_207370    |
| WT_D3A | 3886 | 128117547 | 128119296 | 3.16 | GPR17   | chr2  | + | -1487 | NM_005291    |
| WT_D3A | 3887 | 128122042 | 128122571 | 2.35 | GPR17   | chr2  | + | 2398  | NM_005291    |
| WT_D3A | 4652 | 145546891 | 145547460 | 2.7  | GPR172A | chr8  | + | -5857 | NM_024531    |
| WT_D3A | 3093 | 55675328  | 55676077  | 2.27 | GPR182  | chr12 | + | 1081  | NM_007264    |
| WT_D3A | 4616 | 142439117 | 142444179 | 3.39 | GPR20   | chr8  | - | 4899  | NM_005293    |
| WT_D3A | 2738 | 109887264 | 109888816 | 3.74 | GPR61   | chr1  | + | 4024  | NM_031936    |
| WT_D3A | 3354 | 56260105  | 56261224  | 2.63 | GPR97   | chr16 | + | 1007  | NM_170776    |
| WT_D3A | 3586 | 77606132  | 77607375  | 3.7  | GPS1    | chr17 | + | 3702  | NM_004127    |
| WT_D3A | 3464 | 7161959   | 7162865   | 2.38 | GPS2    | chr17 | - | -3030 | NM_004489    |

|        |      |           |           |      |          |       |   |       |              |
|--------|------|-----------|-----------|------|----------|-------|---|-------|--------------|
| WT_D3A | 4768 | 138365620 | 138365859 | 2.81 | GPSM1    | chr9  | + | -1590 | NM_001145639 |
| WT_D3A | 4767 | 138336919 | 138337353 | 2.62 | GPSM1    | chr9  | + | -4616 | NM_001145638 |
| WT_D3A | 3476 | 18888563  | 18889592  | 2.42 | GRAP     | chr17 | - | 1984  | NM_006613    |
| WT_D3A | 4645 | 145129215 | 145130159 | 2.64 | GRINA    | chr8  | + | -6526 | NM_001009184 |
| WT_D3A | 3168 | 113367737 | 113368851 | 3.57 | GRK1     | chr13 | + | -1303 | NM_002929    |
| WT_D3A | 4263 | 142979853 | 142980002 | 2.75 | GRK7     | chr3  | + | 195   | NM_139209    |
| WT_D3A | 4636 | 144708537 | 144709101 | 3.09 | GSDMD    | chr8  | + | -2800 | NM_024736    |
| WT_D3A | 4636 | 144708537 | 144709101 | 3.09 | GSDMD    | chr8  | + | 2120  | NM_001166237 |
| WT_D3A | 3335 | 27986524  | 27986651  | 2.3  | GSG1L    | chr16 | - | -4256 | NM_001109763 |
| WT_D3A | 4126 | 22683473  | 22683882  | 2.19 | GSTTP1   | chr22 | - | -6419 | NR_003081    |
| WT_D3A | 3703 | 17312179  | 17312743  | 3.47 | GTPBP3   | chr19 | + | 3106  | NM_133644    |
| WT_D3A | 3702 | 17304260  | 17305039  | 3.53 | GTPBP3   | chr19 | + | -4706 | NM_133644    |
| WT_D3A | 3091 | 53154226  | 53154491  | 2.23 | GTSF1    | chr12 | - | -705  | NM_144594    |
| WT_D3A | 4423 | 42276448  | 42276575  | 3.28 | GUCA1B   | chr6  | - | -5839 | NM_002098    |
| WT_D3A | 2721 | 42384789  | 42385238  | 2.68 | GUCA2B   | chr1  | + | -6665 | NM_007102    |
| WT_D3A | 3130 | 50543969  | 50544713  | 3.3  | GUCY1B2  | chr13 | - | -6047 | NR_003923    |
| WT_D3A | 4264 | 150187746 | 150187910 | 2.05 | GYG1     | chr3  | + | -4236 | NM_004130    |
| WT_D3A | 2974 | 45893083  | 45893424  | 2.29 | GYLTL1B  | chr11 | + | -6518 | NM_152312    |
| WT_D3A | 4258 | 130745778 | 130746307 | 2.83 | H1FOO    | chr3  | + | 1296  | NM_153833    |
| WT_D3A | 3803 | 56918333  | 56919287  | 2.53 | HAS1     | chr19 | - | 223   | NM_001523    |
| WT_D3A | 4838 | 152387166 | 152387820 | 2.77 | HAUS7    | chrX  | - | 2304  | NM_017518    |
| WT_D3A | 3697 | 17049534  | 17049698  | 2.52 | HAUS8    | chr19 | - | -2273 | NM_033417    |
| WT_D3A | 2896 | 1739000   | 1739769   | 3.26 | HCCA2    | chr11 | - | 2693  | NM_053005    |
| WT_D3A | 3317 | 3015407   | 3015861   | 2.34 | HCFC1R1  | chr16 | - | -1346 | NM_001002017 |
| WT_D3A | 3933 | 239993517 | 239993772 | 2.66 | HDAC4    | chr2  | - | -6064 | NM_006037    |
| WT_D3A | 4483 | 35703167  | 35703421  | 2.88 | HERPUD2  | chr7  | - | -1997 | NM_022373    |
| WT_D3A | 2647 | 932075    | 932199    | 2.97 | HES4     | chr1  | - | -6722 | NM_001142467 |
| WT_D3A | 3510 | 40579499  | 40579748  | 2.66 | HEXIM1   | chr17 | + | -843  | NM_006460    |
| WT_D3A | 3523 | 45608144  | 45608493  | 2.23 | HILS1    | chr17 | - | -3482 | NR_024193    |
| WT_D3A | 3344 | 29920970  | 29921401  | 2.46 | HIRIP3   | chr16 | - | -6297 | NM_003609    |
| WT_D3A | 3343 | 29912021  | 29913145  | 3.01 | HIRIP3   | chr16 | - | 2305  | NM_003609    |
| WT_D3A | 4394 | 26333485  | 26334029  | 3.25 | HIST1H3E | chr6  | + | 396   | NM_003532    |
| WT_D3A | 3624 | 1020208   | 1020746   | 3.57 | HMHA1    | chr19 | + | 2304  | NM_012292    |
| WT_D3A | 3298 | 1670410   | 1671329   | 3.67 | HN1L     | chr16 | + | 2591  | NM_144570    |
| WT_D3A | 3977 | 42465060  | 42466301  | 2.92 | HNF4A    | chr20 | + | 2343  | NM_178849    |
| WT_D3A | 4482 | 27150946  | 27152226  | 3.79 | HOXA5    | chr7  | - | -1774 | NM_019102    |
| WT_D3A | 4482 | 27150946  | 27152226  | 3.79 | HOXA6    | chr7  | - | 2307  | NM_024014    |
| WT_D3A | 3519 | 44026810  | 44028059  | 3.05 | HOXB5    | chr17 | - | -1332 | NM_002147    |
| WT_D3A | 3730 | 40225081  | 40225830  | 2.95 | HPN      | chr19 | + | 2206  | NM_182983    |
| WT_D3A | 2880 | 529723    | 530097    | 2.56 | HRAS     | chr11 | - | -4360 | NM_001130442 |
| WT_D3A | 4666 | 35897022  | 35897571  | 2.91 | HRCT1    | chr9  | + | 1108  | NM_001039792 |
| WT_D3A | 4369 | 175037229 | 175037978 | 2.85 | HRH2     | chr5  | + | -3466 | NM_022304    |
| WT_D3A | 4001 | 60231403  | 60232078  | 2.16 | HRH3     | chr20 | - | -3022 | NM_007232    |
| WT_D3A | 3849 | 20715922  | 20716586  | 2.32 | HS1BP3   | chr2  | - | -1909 | NM_022460    |
| WT_D3A | 3651 | 5627849   | 5627983   | 2.68 | HSD11B1L | chr19 | + | -4118 | NM_198705    |
| WT_D3A | 3651 | 5627849   | 5627983   | 2.68 | HSD11B1L | chr19 | + | -4158 | NM_198706    |
| WT_D3A | 3651 | 5627849   | 5627983   | 2.68 | HSD11B1L | chr19 | + | -4135 | NM_198707    |



|        |      |           |           |      |               |       |   |       |              |
|--------|------|-----------|-----------|------|---------------|-------|---|-------|--------------|
| WT_D3A | 3651 | 5627849   | 5627983   | 2.68 | HSD11B1L      | chr19 | + | -4130 | NM_198533    |
| WT_D3A | 4833 | 148489874 | 148490138 | 2.32 | HSFX1         | chrX  | - | -5233 | NM_016153    |
| WT_D3A | 4833 | 148489874 | 148490138 | 2.32 | HSFX2         | chrX  | - | -5233 | NM_001164415 |
| WT_D3A | 3692 | 16101068  | 16101292  | 2.27 | HSH2D         | chr19 | + | -4657 | NM_032855    |
| WT_D3A | 2852 | 118493708 | 118494627 | 3.88 | HSPA12A       | chr10 | - | -2092 | NM_025015    |
| WT_D3A | 3179 | 64077381  | 64079055  | 3.58 | HSPA2         | chr14 | + | 1280  | NM_021979    |
| WT_D3A | 2687 | 16223943  | 16224372  | 2.75 | HSPB7         | chr1  | - | -6285 | NM_014424    |
| WT_D3A | 3827 | 60480588  | 60480727  | 2.37 | HSPBP1        | chr19 | - | 2906  | NM_012267    |
| WT_D3A | 2855 | 124213250 | 124213524 | 2.09 | HTRA1         | chr10 | + | 2357  | NM_002775    |
| WT_D3A | 4317 | 8318395   | 8318674   | 2.81 | HTRA3         | chr4  | + | -3857 | NM_053044    |
| WT_D3A | 3665 | 10263158  | 10263802  | 2.98 | ICAM5         | chr19 | + | 1826  | NM_003259    |
| WT_D3A | 3068 | 6529673   | 6530792   | 3.83 | IFFO1         | chr12 | - | -1697 | NM_080731    |
| WT_D3A | 3069 | 6539238   | 6540393   | 2.88 | IFFO1         | chr12 | - | -4325 | NM_080730    |
| WT_D3A | 3190 | 93664171  | 93664926  | 3.67 | IFI27L2       | chr14 | - | 1162  | NM_032036    |
| WT_D3A | 2916 | 2113527   | 2113661   | 2.28 | IGF2          | chr11 | - | 3186  | NM_000612    |
| WT_D3A | 2916 | 2113527   | 2113661   | 2.28 | IGF2AS        | chr11 | + | -4739 | NR_028044    |
| WT_D3A | 2764 | 158181445 | 158181589 | 2.9  | IGSF9         | chr1  | - | 493   | NM_020789    |
| WT_D3A | 4354 | 131423416 | 131423595 | 2.01 | IL3           | chr5  | + | -740  | NM_000588    |
| WT_D3A | 3892 | 130813714 | 130813975 | 2.37 | IMP4          | chr2  | + | -3114 | NM_033416    |
| WT_D3A | 3454 | 4843594   | 4843743   | 2.6  | INCA1         | chr17 | - | -2039 | NM_213726    |
| WT_D3A | 3915 | 220140772 | 220140991 | 2.34 | INHA          | chr2  | + | -4316 | NM_002191    |
| WT_D3A | 3342 | 29910320  | 29910539  | 2.59 | INO80E        | chr16 | + | -4602 | NM_173618    |
| WT_D3A | 3343 | 29912021  | 29913145  | 3.01 | INO80E        | chr16 | + | -2448 | NM_173618    |
| WT_D3A | 2777 | 208045429 | 208046593 | 2.72 | IRF6          | chr1  | - | 91    | NM_006147    |
| WT_D3A | 2647 | 932075    | 932199    | 2.97 | ISG15         | chr1  | + | -6572 | NM_005101    |
| WT_D3A | 3258 | 74409216  | 74409980  | 3.69 | ISL2          | chr15 | + | -6603 | NM_145805    |
| WT_D3A | 3710 | 18415155  | 18415379  | 3.07 | ISYNA1        | chr19 | - | -5324 | NM_016368    |
| WT_D3A | 4092 | 45179731  | 45180080  | 2.51 | ITGB2         | chr21 | - | -6724 | NM_001127491 |
| WT_D3A | 4091 | 45165150  | 45166023  | 3.53 | ITGB2         | chr21 | - | -193  | NM_000211    |
| WT_D3A | 4245 | 52836959  | 52837183  | 2.36 | ITIH4         | chr3  | - | 2686  | NM_001166449 |
| WT_D3A | 3917 | 231436898 | 231437417 | 2.56 | ITM2C         | chr2  | + | -707  | NM_001012516 |
| WT_D3A | 2850 | 106082789 | 106083343 | 2.37 | ITPRIP        | chr10 | - | 587   | NM_033397    |
| WT_D3A | 3876 | 96355694  | 96357038  | 3.66 | ITPRIPL1      | chr2  | + | 705   | NM_178495    |
| WT_D3A | 3876 | 96355694  | 96357038  | 3.66 | ITPRIPL1      | chr2  | + | 1571  | NM_001163523 |
| WT_D3A | 3876 | 96355694  | 96357038  | 3.66 | ITPRIPL1      | chr2  | + | 695   | NM_001163524 |
| WT_D3A | 3876 | 96355694  | 96357038  | 3.66 | ITPRIPL1      | chr2  | + | 1578  | NM_001008949 |
| WT_D3A | 3221 | 104708215 | 104710361 | 2.16 | JAG2          | chr14 | - | -3082 | NM_145159    |
| WT_D3A | 3240 | 39902906  | 39903675  | 3.77 | JMJD7         | chr15 | + | -4284 | NM_001114632 |
| WT_D3A | 3241 | 39904836  | 39906450  | 2.85 | JMJD7         | chr15 | + | -1931 | NM_001114632 |
| WT_D3A | 3242 | 39909434  | 39909668  | 2.61 | JMJD7         | chr15 | + | 1977  | NM_001114632 |
| WT_D3A | 3240 | 39902906  | 39903675  | 3.77 | JMJD7-PLA2G4B | chr15 | + | -4284 | NM_005090    |
| WT_D3A | 3241 | 39904836  | 39906450  | 2.85 | JMJD7-PLA2G4B | chr15 | + | -1931 | NM_005090    |
| WT_D3A | 3242 | 39909434  | 39909668  | 2.61 | JMJD7-PLA2G4B | chr15 | + | 1977  | NM_005090    |
| WT_D3A | 3797 | 55703486  | 55703730  | 2.43 | JOSD2         | chr19 | - | 2549  | NM_138334    |
| WT_D3A | 4628 | 143745331 | 143745981 | 2.33 | JRK           | chr8  | - | 2747  | NM_001077527 |
| WT_D3A | 4528 | 119701790 | 119702529 | 2.06 | KCND2         | chr7  | + | 1202  | NM_012281    |
| WT_D3A | 4368 | 169866153 | 169866680 | 2.79 | KCNIP1        | chr5  | + | 2791  | NM_014592    |

|        |      |           |           |      |            |       |   |       |              |
|--------|------|-----------|-----------|------|------------|-------|---|-------|--------------|
| WT_D3A | 2969 | 17363816  | 17366380  | 3    | KCNJ11     | chr11 | - | 2356  | NM_001166290 |
| WT_D3A | 2969 | 17363816  | 17366380  | 3    | KCNJ11     | chr11 | - | 1684  | NM_000525    |
| WT_D3A | 2993 | 63812538  | 63813682  | 2.67 | KCNK4      | chr11 | + | -2258 | NM_033310    |
| WT_D3A | 4761 | 137728325 | 137728469 | 2.14 | KCNT1      | chr9  | + | -5454 | NM_020822    |
| WT_D3A | 4762 | 137730495 | 137731665 | 2.79 | KCNT1      | chr9  | + | -2771 | NM_020822    |
| WT_D3A | 3047 | 77579624  | 77580063  | 2.01 | KCTD21     | chr11 | - | -2531 | NM_001029859 |
| WT_D3A | 4356 | 137708839 | 137709879 | 3.75 | KDM3B      | chr5  | + | -6824 | NM_016604    |
| WT_D3A | 4428 | 74029787  | 74030343  | 2.85 | KHDC1      | chr6  | - | -437  | NM_030568    |
| WT_D3A | 3401 | 84196964  | 84197578  | 3.79 | KIAA0182   | chr16 | + | -5258 | NM_001134473 |
| WT_D3A | 3401 | 84196964  | 84197578  | 3.79 | KIAA0182   | chr16 | + | -7153 | NM_014615    |
| WT_D3A | 3217 | 104404732 | 104404881 | 3.4  | KIAA0284   | chr14 | + | 2108  | NM_001112726 |
| WT_D3A | 4475 | 4775009   | 4775553   | 3.22 | KIAA0415   | chr7  | + | -6508 | NM_014855    |
| WT_D3A | 2668 | 3651468   | 3652527   | 2.35 | KIAA0495   | chr1  | - | 1749  | NM_207306    |
| WT_D3A | 2685 | 15142301  | 15144050  | 3.28 | KIAA1026   | chr1  | + | -1826 | NM_001017999 |
| WT_D3A | 2683 | 14798586  | 14798945  | 2.21 | KIAA1026   | chr1  | + | 966   | NM_201628    |
| WT_D3A | 2853 | 118757537 | 118757807 | 2.94 | KIAA1598   | chr10 | - | -2594 | NM_001127211 |
| WT_D3A | 3395 | 83096235  | 83096579  | 2.99 | KIAA1609   | chr16 | - | -618  | NM_020947    |
| WT_D3A | 4647 | 145226115 | 145227733 | 2.73 | KIAA1875   | chr8  | + | -7692 | NR_024207    |
| WT_D3A | 4587 | 22515497  | 22515816  | 2.25 | KIAA1967   | chr8  | + | -2839 | NM_021174    |
| WT_D3A | 4586 | 22514097  | 22514341  | 3.43 | KIAA1967   | chr8  | + | -4276 | NM_021174    |
| WT_D3A | 4587 | 22515497  | 22515816  | 2.25 | KIAA1967   | chr8  | + | -2545 | NM_199205    |
| WT_D3A | 4586 | 22514097  | 22514341  | 3.43 | KIAA1967   | chr8  | + | -3982 | NM_199205    |
| WT_D3A | 4782 | 138808031 | 138808210 | 2.47 | KIAA1984   | chr9  | + | -2502 | NM_001039374 |
| WT_D3A | 3454 | 4843594   | 4843743   | 2.6  | KIF1C      | chr17 | + | 1669  | NM_006612    |
| WT_D3A | 3894 | 149347814 | 149347960 | 2.02 | KIF5C      | chr2  | + | -1401 | NM_004522    |
| WT_D3A | 4657 | 145656676 | 145656810 | 2.12 | KIFC2      | chr8  | + | -5802 | NM_145754    |
| WT_D3A | 3681 | 12856456  | 12856895  | 2.41 | KLF1       | chr19 | - | 2342  | NM_006563    |
| WT_D3A | 3631 | 1812600   | 1813249   | 2.29 | KLF16      | chr19 | - | 1640  | NM_031918    |
| WT_D3A | 4424 | 43086305  | 43086969  | 2.92 | KLHDC3     | chr6  | + | -3317 | NM_057161    |
| WT_D3A | 3409 | 86354041  | 86354277  | 2.21 | KLHDC4     | chr16 | - | 2884  | NM_017566    |
| WT_D3A | 2646 | 882242    | 883291    | 4.08 | KLHL17     | chr1  | + | -3063 | NM_198317    |
| WT_D3A | 2645 | 879538    | 879672    | 2.8  | KLHL17     | chr1  | + | -6224 | NM_198317    |
| WT_D3A | 3800 | 56049402  | 56049661  | 2.78 | KLK3       | chr19 | + | -451  | NM_001648    |
| WT_D3A | 3801 | 56050607  | 56051062  | 3.04 | KLK3       | chr19 | + | 852   | NM_001648    |
| WT_D3A | 2745 | 150998761 | 150998885 | 2.2  | KPRP       | chr1  | + | 1694  | NM_001025231 |
| WT_D3A | 3772 | 52678069  | 52678608  | 2.84 | KPTN       | chr19 | - | 995   | NM_007059    |
| WT_D3A | 3499 | 36933794  | 36933923  | 2.03 | KRT15      | chr17 | - | -5062 | NM_002275    |
| WT_D3A | 3500 | 37035651  | 37035970  | 2.5  | KRT17      | chr17 | - | -1402 | NM_000422    |
| WT_D3A | 3088 | 51623449  | 51625104  | 2.45 | KRT18      | chr12 | + | -4645 | NM_199187    |
| WT_D3A | 3088 | 51623449  | 51625104  | 2.45 | KRT18      | chr12 | + | -4833 | NM_000224    |
| WT_D3A | 3085 | 50871207  | 50871551  | 2.83 | KRT80      | chr12 | - | 672   | NM_182507    |
| WT_D3A | 3086 | 51046877  | 51047931  | 2.19 | KRT85      | chr12 | - | 172   | NM_002283    |
| WT_D3A | 3087 | 51051378  | 51051759  | 3.11 | KRT85      | chr12 | - | -3992 | NM_002283    |
| WT_D3A | 4087 | 44943139  | 44944288  | 2.32 | KRTAP10-12 | chr21 | + | 2199  | NM_198699    |
| WT_D3A | 4086 | 44847044  | 44847488  | 2.5  | KRTAP10-7  | chr21 | + | 2342  | NM_198689    |
| WT_D3A | 2893 | 1673506   | 1673950   | 2.7  | KRTAP5-6   | chr11 | + | -1272 | NM_001012416 |
| WT_D3A | 4857 | 153364095 | 153364254 | 2.41 | LAGE3      | chrX  | - | -3384 | NM_006014    |

|        |      |           |           |      |              |       |   |       |              |
|--------|------|-----------|-----------|------|--------------|-------|---|-------|--------------|
| WT_D3A | 4005 | 60382918  | 60383557  | 2.48 | LAMA5        | chr20 | - | -7474 | NM_005560    |
| WT_D3A | 4004 | 60373624  | 60373788  | 2.23 | LAMA5        | chr20 | - | 2057  | NM_005560    |
| WT_D3A | 3340 | 28902927  | 28903271  | 2.18 | LAT          | chr16 | + | -548  | NM_001014989 |
| WT_D3A | 3340 | 28902927  | 28903271  | 2.18 | LAT          | chr16 | + | -788  | NM_014387    |
| WT_D3A | 3368 | 66537878  | 66538037  | 2.41 | LCAT         | chr16 | - | -2441 | NM_000229    |
| WT_D3A | 3369 | 66538826  | 66539291  | 3.3  | LCAT         | chr16 | - | -3542 | NM_000229    |
| WT_D3A | 3367 | 66534088  | 66534227  | 2.11 | LCAT         | chr16 | - | 1359  | NM_000229    |
| WT_D3A | 4781 | 138760307 | 138760436 | 2.65 | LCN10        | chr9  | - | -3139 | NM_001001712 |
| WT_D3A | 4783 | 138969123 | 138969377 | 2.27 | LCN12        | chr9  | + | 2662  | NM_178536    |
| WT_D3A | 4781 | 138760307 | 138760436 | 2.65 | LCN6         | chr9  | - | 2430  | NM_198946    |
| WT_D3A | 4784 | 138996088 | 138997027 | 2.38 | LCNL1        | chr9  | + | -708  | NM_207510    |
| WT_D3A | 3893 | 136310852 | 136311176 | 2.39 | LCT          | chr2  | - | 206   | NM_002299    |
| WT_D3A | 2834 | 88415327  | 88415791  | 2.94 | LDB3         | chr10 | + | -2741 | NM_001080116 |
| WT_D3A | 2834 | 88415327  | 88415791  | 2.94 | LDB3         | chr10 | + | -2846 | NM_007078    |
| WT_D3A | 4411 | 33869107  | 33869440  | 2.71 | LEMD2        | chr6  | - | -6576 | NM_001143944 |
| WT_D3A | 4411 | 33869107  | 33869440  | 2.71 | LEMD2        | chr6  | - | -4389 | NM_181336    |
| WT_D3A | 3809 | 59358116  | 59359040  | 3.62 | LENG1        | chr19 | - | -3320 | NM_024316    |
| WT_D3A | 3070 | 6804854   | 6805486   | 3.43 | LEPREL2      | chr12 | + | -2662 | NM_014262    |
| WT_D3A | 3566 | 74487790  | 74488169  | 2.16 | LGALS3BP     | chr17 | - | -323  | NM_005567    |
| WT_D3A | 3731 | 40322197  | 40322351  | 2.53 | LGI4         | chr19 | - | -4256 | NM_139284    |
| WT_D3A | 3779 | 54215666  | 54216410  | 3.84 | LHB          | chr19 | - | -3879 | NM_000894    |
| WT_D3A | 4765 | 138240902 | 138241327 | 2.3  | LHX3         | chr9  | - | -6289 | NM_014564    |
| WT_D3A | 4765 | 138240902 | 138241327 | 2.3  | LHX3         | chr9  | - | -4338 | NM_178138    |
| WT_D3A | 4766 | 138243023 | 138243364 | 2.89 | LHX3         | chr9  | - | -6417 | NM_178138    |
| WT_D3A | 4138 | 28979357  | 28979700  | 2.98 | LIF          | chr22 | - | -6732 | NM_002309    |
| WT_D3A | 3811 | 59520795  | 59521334  | 2.19 | LILRA5       | chr19 | - | -4843 | NM_021250    |
| WT_D3A | 3811 | 59520795  | 59521334  | 2.19 | LILRA5       | chr19 | - | -4884 | NM_181985    |
| WT_D3A | 3890 | 128154913 | 128155276 | 2.18 | LIMS2        | chr2  | - | -5860 | NM_001161403 |
| WT_D3A | 3889 | 128135895 | 128136149 | 2.38 | LIMS2        | chr2  | - | 2615  | NM_017980    |
| WT_D3A | 3886 | 128117547 | 128119296 | 3.16 | LIMS2        | chr2  | - | 3802  | NR_027823    |
| WT_D3A | 3887 | 128122042 | 128122571 | 2.35 | LIMS2        | chr2  | - | -83   | NR_027823    |
| WT_D3A | 3888 | 128125280 | 128125959 | 3.12 | LIMS2        | chr2  | - | -3396 | NR_027823    |
| WT_D3A | 3890 | 128154913 | 128155276 | 2.18 | LIMS2        | chr2  | - | 736   | NM_001161404 |
| WT_D3A | 4010 | 60765541  | 60766270  | 2.87 | LOC100127888 | chr20 | - | 2513  | NR_024470    |
| WT_D3A | 2656 | 2119774   | 2120013   | 2.1  | LOC100128003 | chr1  | - | -5009 | NR_024445    |
| WT_D3A | 2711 | 32602207  | 32602535  | 2.46 | LOC100128071 | chr1  | - | -1940 | NM_001167676 |
| WT_D3A | 4704 | 126154992 | 126155824 | 2.76 | LOC100129034 | chr9  | + | -164  | NR_027406    |
| WT_D3A | 3407 | 86301908  | 86302343  | 2.59 | LOC100129637 | chr16 | - | -5334 | NR_024488    |
| WT_D3A | 4325 | 68730729  | 68730948  | 2.04 | LOC100130017 | chr4  | + | 234   | NR_015446    |
| WT_D3A | 3117 | 131359614 | 131359738 | 2.38 | LOC100130238 | chr12 | + | -2373 | NR_024563    |
| WT_D3A | 3118 | 131363914 | 131364138 | 3.1  | LOC100130238 | chr12 | + | 1977  | NR_024563    |
| WT_D3A | 4288 | 1191755   | 1191908   | 2.23 | LOC100130872 | chr4  | - | 919   | NR_024569    |
| WT_D3A | 3983 | 45382383  | 45382602  | 2.62 | LOC100131496 | chr20 | + | 1840  | NR_024594    |
| WT_D3A | 3511 | 40687961  | 40688280  | 3.31 | LOC100133991 | chr17 | + | -7220 | NR_024435    |
| WT_D3A | 3952 | 2745617   | 2746066   | 3.01 | LOC100288797 | chr20 | + | 866   | NM_001167670 |
| WT_D3A | 3291 | 1066907   | 1067226   | 2.56 | LOC146336    | chr16 | - | 1666  | NR_027242    |
| WT_D3A | 2776 | 206061428 | 206062202 | 3.22 | LOC148696    | chr1  | + | 3469  | NR_026817    |

|        |      |           |           |      |           |       |   |       |              |
|--------|------|-----------|-----------|------|-----------|-------|---|-------|--------------|
| WT_D3A | 2793 | 245020126 | 245020380 | 2.3  | LOC149134 | chr1  | + | 712   | NR_015422    |
| WT_D3A | 2794 | 245021536 | 245021675 | 2.99 | LOC149134 | chr1  | + | 2064  | NR_015422    |
| WT_D3A | 3881 | 110579226 | 110579355 | 2.22 | LOC151009 | chr2  | - | -2640 | NR_027244    |
| WT_D3A | 4666 | 35897022  | 35897571  | 2.91 | LOC158376 | chr9  | + | -2183 | NR_024283    |
| WT_D3A | 4074 | 44054801  | 44055855  | 3.11 | LOC284837 | chr21 | - | 1548  | NR_026961    |
| WT_D3A | 4075 | 44061978  | 44062327  | 2.65 | LOC284837 | chr21 | - | -5276 | NR_026961    |
| WT_D3A | 3577 | 76751058  | 76751377  | 2.4  | LOC388428 | chr17 | + | -2684 | NR_027255    |
| WT_D3A | 3418 | 87464906  | 87465030  | 2.36 | LOC390748 | chr16 | - | -4453 | NM_001080487 |
| WT_D3A | 4184 | 44860575  | 44860829  | 2.24 | LOC400931 | chr22 | + | 162   | NR_027033    |
| WT_D3A | 4185 | 44861780  | 44862914  | 2.77 | LOC400931 | chr22 | + | 1807  | NR_027033    |
| WT_D3A | 4539 | 149209122 | 149209352 | 2.19 | LOC401431 | chr7  | - | -7353 | NR_027040    |
| WT_D3A | 4864 | 18200570  | 18200719  | 2    | LOC401629 | chrY  | - | 82    | NR_002160    |
| WT_D3A | 4864 | 18200570  | 18200719  | 2    | LOC401630 | chrY  | - | 103   | NR_002161    |
| WT_D3A | 3541 | 71134417  | 71134646  | 2.66 | LOC643008 | chr17 | + | -6577 | NM_001162995 |
| WT_D3A | 3128 | 39951445  | 39952105  | 3.14 | LOC646982 | chr13 | - | 1368  | NR_024506    |
| WT_D3A | 4123 | 21229226  | 21229601  | 2.51 | LOC648691 | chr22 | + | -2342 | NR_027426    |
| WT_D3A | 2736 | 103914666 | 103914800 | 2.66 | LOC648740 | chr1  | + | 1185  | NR_024438    |
| WT_D3A | 2779 | 211100353 | 211101222 | 2.83 | LQK1      | chr1  | - | -2684 | NR_027286    |
| WT_D3A | 4517 | 100018591 | 100020356 | 3.46 | LRCH4     | chr7  | - | 2239  | NM_002319    |
| WT_D3A | 3737 | 41121488  | 41121642  | 2.5  | LRFN3     | chr19 | + | 1704  | NM_024509    |
| WT_D3A | 3023 | 66377980  | 66378219  | 2.28 | LRFN4     | chr11 | + | -3352 | NM_024036    |
| WT_D3A | 4131 | 24091527  | 24093606  | 2.81 | LRP5L     | chr22 | - | -4042 | NM_182492    |
| WT_D3A | 4789 | 139185918 | 139186857 | 2.98 | LRRC26    | chr9  | - | -2075 | NM_001013653 |
| WT_D3A | 4083 | 44701555  | 44701969  | 2.3  | LRRC3     | chr21 | + | 1942  | NM_030891    |
| WT_D3A | 3584 | 77575827  | 77575961  | 2.68 | LRRC45    | chr17 | + | 1326  | NM_144999    |
| WT_D3A | 2880 | 529723    | 530097    | 2.56 | LRRC56    | chr11 | + | 2389  | NM_198075    |
| WT_D3A | 3063 | 1799981   | 1800435   | 2.59 | LRTM2     | chr12 | + | 515   | NM_001163926 |
| WT_D3A | 3038 | 71470189  | 71470340  | 2.4  | LRTOMT    | chr11 | + | 924   | NM_001145307 |
| WT_D3A | 3038 | 71470189  | 71470340  | 2.4  | LRTOMT    | chr11 | + | 1235  | NM_001145308 |
| WT_D3A | 2901 | 1840526   | 1842048   | 3.45 | LSP1      | chr11 | + | -7442 | NM_001013255 |
| WT_D3A | 2900 | 1833626   | 1834255   | 2.76 | LSP1      | chr11 | + | 3165  | NM_002339    |
| WT_D3A | 2901 | 1840526   | 1842048   | 3.45 | LSP1      | chr11 | + | -7387 | NM_001013254 |
| WT_D3A | 2901 | 1840526   | 1842048   | 3.45 | LSP1      | chr11 | + | -5191 | NM_001013253 |
| WT_D3A | 3011 | 65083723  | 65085933  | 4.02 | LTBP3     | chr11 | - | -2553 | NM_021070    |
| WT_D3A | 4629 | 143830354 | 143830806 | 2.75 | LYPD2     | chr8  | - | 374   | NM_205545    |
| WT_D3A | 4429 | 90405075  | 90405244  | 2.25 | LYRM2     | chr6  | - | -222  | NR_028495    |
| WT_D3A | 4429 | 90405075  | 90405244  | 2.25 | LYRM2     | chr6  | - | 36    | NM_020466    |
| WT_D3A | 2843 | 102743018 | 102744149 | 2.18 | LZTS2     | chr10 | + | -3371 | NM_032429    |
| WT_D3A | 4465 | 2245332   | 2245596   | 2.45 | MAD1L1    | chr7  | - | -6355 | NM_003550    |
| WT_D3A | 2768 | 165224949 | 165225223 | 2.26 | MAEL      | chr1  | + | -56   | NM_032858    |
| WT_D3A | 4647 | 145226115 | 145227733 | 2.73 | MAF1      | chr8  | + | -4368 | NM_032272    |
| WT_D3A | 4635 | 144589269 | 144590008 | 2.95 | MAFA      | chr8  | - | -5919 | NM_201589    |
| WT_D3A | 4634 | 144586036 | 144586380 | 3.16 | MAFA      | chr8  | - | -2489 | NM_201589    |
| WT_D3A | 4457 | 1530111   | 1530375   | 2.22 | MAFK      | chr7  | + | -6650 | NM_002360    |
| WT_D3A | 4825 | 51943341  | 51943985  | 4.56 | MAGED4    | chrX  | + | -1084 | NM_001098800 |
| WT_D3A | 4825 | 51943341  | 51943985  | 4.56 | MAGED4B   | chrX  | + | -995  | NM_177535    |
| WT_D3A | 4786 | 139094774 | 139095233 | 2.54 | MAN1B1    | chr9  | + | -6234 | NM_016219    |

|        |      |           |           |      |           |       |   |       |              |
|--------|------|-----------|-----------|------|-----------|-------|---|-------|--------------|
| WT_D3A | 3012 | 65141498  | 65141951  | 3.46 | MAP3K11   | chr11 | - | -3428 | NM_002419    |
| WT_D3A | 3090 | 52184756  | 52185790  | 2.74 | MAP3K12   | chr12 | - | -5735 | NM_006301    |
| WT_D3A | 4267 | 185028987 | 185029515 | 3.26 | MAP6D1    | chr3  | - | -3164 | NM_024871    |
| WT_D3A | 2973 | 45861405  | 45862330  | 3.84 | MAPK8IP1  | chr11 | + | -1910 | NM_005456    |
| WT_D3A | 3763 | 50439991  | 50440150  | 2.23 | MARK4     | chr19 | + | -6611 | NM_031417    |
| WT_D3A | 2707 | 30967060  | 30967379  | 2.57 | MATN1     | chr1  | - | 1800  | NM_002379    |
| WT_D3A | 3341 | 29728578  | 29728817  | 2.56 | MAZ       | chr16 | + | 3342  | NM_002383    |
| WT_D3A | 3603 | 46066277  | 46067196  | 3.58 | MBD1      | chr18 | - | -4594 | NM_015845    |
| WT_D3A | 3992 | 54257725  | 54257944  | 2.34 | MC3R      | chr20 | + | 640   | NM_019888    |
| WT_D3A | 4424 | 43086305  | 43086969  | 2.92 | MEA1      | chr6  | - | 2959  | NM_014623    |
| WT_D3A | 3100 | 115203321 | 115203509 | 2.05 | MED13L    | chr12 | - | -4041 | NM_015335    |
| WT_D3A | 3597 | 78627556  | 78627730  | 2.44 | METRNL    | chr17 | + | -3212 | NM_001004431 |
| WT_D3A | 3089 | 51933932  | 51934281  | 2.52 | MFS5      | chr12 | + | 1960  | NM_032889    |
| WT_D3A | 4169 | 38206816  | 38207465  | 2.83 | MGAT3     | chr22 | + | -6034 | NM_001098270 |
| WT_D3A | 3480 | 20352588  | 20353147  | 2.39 | MGC102966 | chr17 | - | -4464 | NR_029393    |
| WT_D3A | 3414 | 87249897  | 87250046  | 3.17 | MGC23284  | chr16 | + | -7310 | NR_024402    |
| WT_D3A | 2651 | 1543859   | 1544308   | 2.73 | MIB2      | chr1  | + | 3337  | NM_080875    |
| WT_D3A | 2967 | 12266652  | 12267616  | 3.56 | MICALCL   | chr11 | + | 2112  | NM_032867    |
| WT_D3A | 3537 | 70775403  | 70776047  | 4.03 | MIF4GD    | chr17 | - | 3173  | NM_020679    |
| WT_D3A | 4480 | 7571857   | 7572323   | 2.08 | MIOS      | chr7  | + | -1050 | NM_019005    |
| WT_D3A | 4205 | 49269628  | 49269957  | 2.64 | MIOX      | chr22 | + | -2286 | NM_017584    |
| WT_D3A | 3204 | 100581418 | 100581647 | 3.47 | MIR1185-1 | chr14 | + | 2466  | NR_031575    |
| WT_D3A | 3204 | 100581418 | 100581647 | 3.47 | MIR1185-2 | chr14 | + | 1245  | NR_031571    |
| WT_D3A | 4654 | 145602633 | 145602992 | 2.31 | MIR1234   | chr8  | - | -6445 | NR_031600    |
| WT_D3A | 4402 | 32038368  | 32039410  | 2.9  | MIR1236   | chr6  | - | -6193 | NR_031601    |
| WT_D3A | 3575 | 76722051  | 76722385  | 2.39 | MIR1250   | chr17 | - | -515  | NR_031652    |
| WT_D3A | 3576 | 76723361  | 76723490  | 2.25 | MIR1250   | chr17 | - | -1722 | NR_031652    |
| WT_D3A | 4778 | 138682496 | 138682955 | 2.53 | MIR126    | chr9  | + | -2149 | NR_029695    |
| WT_D3A | 4114 | 18454060  | 18454886  | 2.4  | MIR1306   | chr22 | + | 893   | NR_031706    |
| WT_D3A | 3040 | 72006988  | 72007632  | 2.78 | MIR139    | chr11 | - | -3488 | NR_029603    |
| WT_D3A | 3075 | 6933687   | 6936514   | 4.27 | MIR141    | chr12 | + | -8420 | NR_029682    |
| WT_D3A | 4531 | 129200191 | 129201141 | 3.37 | MIR182    | chr7  | - | -3098 | NR_029614    |
| WT_D3A | 4531 | 129200191 | 129201141 | 3.37 | MIR183    | chr7  | - | 1424  | NR_029615    |
| WT_D3A | 4113 | 18396110  | 18397059  | 3.53 | MIR185    | chr22 | + | -4077 | NR_029706    |
| WT_D3A | 4031 | 62049017  | 62049366  | 2.69 | MIR1914   | chr20 | - | -5850 | NR_031735    |
| WT_D3A | 3484 | 26912160  | 26912304  | 2.42 | MIR193A   | chr17 | + | 1105  | NR_029710    |
| WT_D3A | 3461 | 6867512   | 6868345   | 2.16 | MIR195    | chr17 | - | -6184 | NR_029712    |
| WT_D3A | 3460 | 6863195   | 6863828   | 2.98 | MIR195    | chr17 | - | -1767 | NR_029712    |
| WT_D3A | 3671 | 10795623  | 10795882  | 2.76 | MIR199A1  | chr19 | - | -6580 | NR_029586    |
| WT_D3A | 3670 | 10790617  | 10790786  | 2.32 | MIR199A1  | chr19 | - | -1529 | NR_029586    |
| WT_D3A | 3075 | 6933687   | 6936514   | 4.27 | MIR200C   | chr12 | + | -8022 | NR_029779    |
| WT_D3A | 3462 | 7066161   | 7067216   | 4.05 | MIR324    | chr17 | - | 734   | NR_029896    |
| WT_D3A | 3360 | 65797420  | 65797665  | 2.44 | MIR328    | chr16 | - | -3743 | NR_029887    |
| WT_D3A | 3361 | 65799010  | 65799274  | 2.28 | MIR328    | chr16 | - | -5343 | NR_029887    |
| WT_D3A | 4449 | 1032415   | 1033297   | 2.42 | MIR339    | chr7  | - | -3668 | NR_029898    |
| WT_D3A | 3204 | 100581418 | 100581647 | 3.47 | MIR381    | chr14 | + | -477  | NR_029873    |
| WT_D3A | 4692 | 116007070 | 116007604 | 2.79 | MIR455    | chr9  | + | -4197 | NR_030255    |

|        |      |           |           |      |         |       |   |       |              |
|--------|------|-----------|-----------|------|---------|-------|---|-------|--------------|
| WT_D3A | 2916 | 2113527   | 2113661   | 2.28 | MIR483  | chr11 | - | -1579 | NR_030158    |
| WT_D3A | 4596 | 41641462  | 41642219  | 2.51 | MIR486  | chr8  | - | -4657 | NR_030161    |
| WT_D3A | 3204 | 100581418 | 100581647 | 3.47 | MIR487A | chr14 | + | -7003 | NR_030162    |
| WT_D3A | 3204 | 100581418 | 100581647 | 3.47 | MIR487B | chr14 | + | -1012 | NR_030267    |
| WT_D3A | 3203 | 100566632 | 100567348 | 2.33 | MIR494  | chr14 | + | 1267  | NR_030174    |
| WT_D3A | 3203 | 100566632 | 100567348 | 2.33 | MIR495  | chr14 | + | -2854 | NR_030175    |
| WT_D3A | 3461 | 6867512   | 6868345   | 2.16 | MIR497  | chr17 | - | -5863 | NR_030178    |
| WT_D3A | 3460 | 6863195   | 6863828   | 2.98 | MIR497  | chr17 | - | -1446 | NR_030178    |
| WT_D3A | 3204 | 100581418 | 100581647 | 3.47 | MIR539  | chr14 | + | -1878 | NR_030256    |
| WT_D3A | 3203 | 100566632 | 100567348 | 2.33 | MIR543  | chr14 | + | -1086 | NR_030619    |
| WT_D3A | 2667 | 3473550   | 3473784   | 2.39 | MIR551A | chr1  | - | -6453 | NR_030277    |
| WT_D3A | 4328 | 83898932  | 83900483  | 3.14 | MIR575  | chr4  | - | -6100 | NR_030301    |
| WT_D3A | 4478 | 5503911   | 5504145   | 2.78 | MIR589  | chr7  | - | -1954 | NR_030318    |
| WT_D3A | 4530 | 127502560 | 127502799 | 2.56 | MIR593  | chr7  | + | -6469 | NR_030324    |
| WT_D3A | 4563 | 158023886 | 158024155 | 2.27 | MIR595  | chr7  | - | -5754 | NR_030325    |
| WT_D3A | 4699 | 124913160 | 124913404 | 2.66 | MIR600  | chr9  | - | 461   | NR_030331    |
| WT_D3A | 4700 | 124914330 | 124914709 | 3.41 | MIR600  | chr9  | - | -776  | NR_030331    |
| WT_D3A | 4703 | 125204854 | 125205078 | 2.28 | MIR601  | chr9  | - | -263  | NR_030332    |
| WT_D3A | 4810 | 139846412 | 139846651 | 3.11 | MIR602  | chr9  | + | -6160 | NR_030333    |
| WT_D3A | 2810 | 29879472  | 29879691  | 2.24 | MIR604  | chr10 | - | -5549 | NR_030335    |
| WT_D3A | 3256 | 73439538  | 73441473  | 2.58 | MIR631  | chr15 | - | -7426 | NR_030360    |
| WT_D3A | 3644 | 3917883   | 3918132   | 2.26 | MIR637  | chr19 | - | -5497 | NR_030367    |
| WT_D3A | 4031 | 62049017  | 62049366  | 2.69 | MIR647  | chr20 | - | -4668 | NR_030377    |
| WT_D3A | 3204 | 100581418 | 100581647 | 3.47 | MIR655  | chr14 | + | -4107 | NR_030391    |
| WT_D3A | 4553 | 150565444 | 150565868 | 2.29 | MIR671  | chr7  | + | -783  | NR_030407    |
| WT_D3A | 2758 | 155176874 | 155177018 | 2.11 | MIR765  | chr1  | - | -4286 | NR_030527    |
| WT_D3A | 3769 | 51216558  | 51217792  | 3.11 | MIR769  | chr19 | + | 3146  | NR_030412    |
| WT_D3A | 3202 | 100388200 | 100388329 | 2.52 | MIR770  | chr14 | + | -215  | NR_030528    |
| WT_D3A | 3204 | 100581418 | 100581647 | 3.47 | MIR889  | chr14 | + | -2458 | NR_030595    |
| WT_D3A | 2753 | 153427091 | 153427240 | 2.12 | MIR92B  | chr1  | + | -4426 | NR_030281    |
| WT_D3A | 2752 | 153424796 | 153425155 | 2.56 | MIR92B  | chr1  | + | -6616 | NR_030281    |
| WT_D3A | 3806 | 59179500  | 59179635  | 2.51 | MIR935  | chr19 | + | 2195  | NR_030632    |
| WT_D3A | 3308 | 2261033   | 2261167   | 2.94 | MIR940  | chr16 | + | -648  | NR_030636    |
| WT_D3A | 4531 | 129200191 | 129201141 | 3.37 | MIR96   | chr7  | - | 1179  | NR_029512    |
| WT_D3A | 3489 | 34116624  | 34117478  | 3.51 | MLLT6   | chr17 | + | 1653  | NM_005937    |
| WT_D3A | 3504 | 37967118  | 37967862  | 3.76 | MLX     | chr17 | + | -5113 | NM_198205    |
| WT_D3A | 2835 | 88709455  | 88710034  | 3.71 | MMRN2   | chr10 | - | -2339 | NM_024756    |
| WT_D3A | 2730 | 46851425  | 46851744  | 2.56 | MOBKLC  | chr1  | - | 1808  | NM_145279    |
| WT_D3A | 2963 | 3210876   | 3211110   | 2.3  | MRGPRE  | chr11 | - | -801  | NM_001039165 |
| WT_D3A | 3517 | 43267847  | 43268401  | 2.47 | MRPL10  | chr17 | - | -4222 | NM_145255    |
| WT_D3A | 4347 | 1849548   | 1850027   | 3.2  | MRPL36  | chr5  | - | 3169  | NM_032479    |
| WT_D3A | 4800 | 139561239 | 139561993 | 2.22 | MRPL41  | chr9  | + | -4513 | NM_032477    |
| WT_D3A | 2842 | 102733300 | 102734879 | 2.51 | MRPL43  | chr10 | - | 3173  | NM_176792    |
| WT_D3A | 2843 | 102743018 | 102744149 | 2.18 | MRPL43  | chr10 | - | -6321 | NM_176792    |
| WT_D3A | 2717 | 36705076  | 36705613  | 2.59 | MRPS15  | chr1  | - | -2717 | NM_031280    |
| WT_D3A | 3299 | 1769444   | 1769588   | 2.1  | MRPS34  | chr16 | - | -6375 | NM_023936    |
| WT_D3A | 2985 | 62130341  | 62130555  | 2.47 | MTA2    | chr11 | - | -4569 | NM_004739    |

|        |      |           |           |      |            |       |   |       |              |
|--------|------|-----------|-----------|------|------------|-------|---|-------|--------------|
| WT_D3A | 3942 | 241696122 | 241696369 | 2.97 | MTERFD2    | chr2  | - | -5825 | NM_182501    |
| WT_D3A | 3941 | 241689473 | 241689862 | 2.39 | MTERFD2    | chr2  | - | 753   | NM_182501    |
| WT_D3A | 3098 | 105903159 | 105903693 | 3.08 | MTERFD3    | chr12 | - | 1633  | NM_025198    |
| WT_D3A | 2743 | 148172505 | 148173144 | 2.51 | MTMR11     | chr1  | - | 2066  | NM_181873    |
| WT_D3A | 2743 | 148172505 | 148173144 | 2.51 | MTMR11     | chr1  | - | 2591  | NM_001145862 |
| WT_D3A | 3526 | 53953334  | 53954061  | 2.66 | MTMR4      | chr17 | - | -3447 | NM_004687    |
| WT_D3A | 2753 | 153427091 | 153427240 | 2.12 | MUC1       | chr1  | - | 2159  | NM_001044392 |
| WT_D3A | 4295 | 2230509   | 2230858   | 2.78 | MXD4       | chr4  | - | 2854  | NM_006454    |
| WT_D3A | 3447 | 4411094   | 4411234   | 2.28 | MYBBP1A    | chr17 | - | -5734 | NM_001105538 |
| WT_D3A | 2977 | 47329134  | 47329383  | 2.57 | MYBPC3     | chr11 | - | 1571  | NM_000256    |
| WT_D3A | 3848 | 16003370  | 16003797  | 2.57 | MYCNOS     | chr2  | - | -4287 | NR_026766    |
| WT_D3A | 4221 | 46877268  | 46878487  | 2.67 | MYL3       | chr3  | - | 2100  | NM_000258    |
| WT_D3A | 3345 | 30290265  | 30292004  | 3.25 | MYLPF      | chr16 | + | -2489 | NM_013292    |
| WT_D3A | 3473 | 17952844  | 17954128  | 3.27 | MYO15A     | chr17 | + | 742   | NM_016239    |
| WT_D3A | 3472 | 17951247  | 17951503  | 2.65 | MYO15A     | chr17 | + | -1369 | NM_016239    |
| WT_D3A | 3437 | 1347920   | 1348045   | 2.1  | MYO1C      | chr17 | - | -6260 | NM_033375    |
| WT_D3A | 3437 | 1347920   | 1348045   | 2.1  | MYO1C      | chr17 | - | -5231 | NM_001080779 |
| WT_D3A | 3697 | 17049534  | 17049698  | 2.52 | MYO9B      | chr19 | + | 2026  | NM_004145    |
| WT_D3A | 3696 | 17041329  | 17042168  | 2.68 | MYO9B      | chr19 | + | -5842 | NM_004145    |
| WT_D3A | 2699 | 24309139  | 24309378  | 2.37 | MYOM3      | chr1  | - | 1994  | NM_152372    |
| WT_D3A | 4709 | 129868646 | 129868995 | 2.74 | NAIF1      | chr9  | - | 600   | NM_197956    |
| WT_D3A | 4329 | 89838483  | 89839104  | 2.66 | NAP1L5     | chr4  | - | -747  | NM_153757    |
| WT_D3A | 4638 | 144738769 | 144739108 | 2.25 | NAPRT1     | chr8  | - | -7282 | NM_145201    |
| WT_D3A | 2989 | 63459359  | 63459718  | 2.52 | NAT11      | chr11 | + | -3479 | NM_024771    |
| WT_D3A | 2970 | 19329177  | 19329411  | 2.48 | NAV2       | chr11 | + | 448   | NM_001111018 |
| WT_D3A | 3639 | 3139587   | 3139836   | 2.73 | NCLN       | chr19 | + | 2837  | NM_020170    |
| WT_D3A | 3638 | 3137868   | 3138317   | 2.96 | NCLN       | chr19 | + | 1218  | NM_020170    |
| WT_D3A | 3349 | 30845446  | 30845591  | 2.35 | NCRNA00095 | chr16 | - | -3427 | NR_024348    |
| WT_D3A | 4812 | 1473000   | 1473424   | 3.62 | NCRNA00105 | chrX  | + | -6211 | NR_026710    |
| WT_D3A | 4813 | 1481528   | 1481947   | 2.7  | NCRNA00105 | chrX  | + | 2314  | NR_026710    |
| WT_D3A | 4098 | 45670899  | 45671733  | 2.91 | NCRNA00175 | chr21 | - | -1903 | NR_027498    |
| WT_D3A | 4098 | 45670899  | 45671733  | 2.91 | NCRNA00175 | chr21 | - | -1933 | NR_028082    |
| WT_D3A | 4032 | 62131465  | 62131624  | 2.11 | NCRNA00176 | chr20 | + | -4596 | NR_027687    |
| WT_D3A | 4033 | 62134340  | 62134604  | 2.59 | NCRNA00176 | chr20 | + | -1668 | NR_027687    |
| WT_D3A | 4034 | 62136265  | 62136521  | 2.4  | NCRNA00176 | chr20 | + | 253   | NR_027687    |
| WT_D3A | 2801 | 1188891   | 1189320   | 2.85 | NCRNA00200 | chr10 | + | -6602 | NR_015376    |
| WT_D3A | 4178 | 43345294  | 43346848  | 4.1  | NCRNA00207 | chr22 | + | 2188  | NR_028411    |
| WT_D3A | 4232 | 49026420  | 49027254  | 3.25 | NDUFAF3    | chr3  | + | -6784 | NM_199073    |
| WT_D3A | 4232 | 49026420  | 49027254  | 3.25 | NDUFAF3    | chr3  | + | -6074 | NM_199074    |
| WT_D3A | 4232 | 49026420  | 49027254  | 3.25 | NDUFAF3    | chr3  | + | -7240 | NM_199069    |
| WT_D3A | 3046 | 77472589  | 77472834  | 2.61 | NDUFC2     | chr11 | - | -3798 | NM_004549    |
| WT_D3A | 2767 | 159428775 | 159429019 | 2.35 | NDUFS2     | chr1  | + | -6831 | NM_004550    |
| WT_D3A | 4347 | 1849548   | 1850027   | 3.2  | NDUFS6     | chr5  | + | -4708 | NM_004553    |
| WT_D3A | 3394 | 82556670  | 82557199  | 2.92 | NECAB2     | chr16 | + | -2803 | NM_019065    |
| WT_D3A | 3877 | 96538398  | 96539222  | 4.11 | NEURL3     | chr2  | - | -1237 | NR_026875    |
| WT_D3A | 3465 | 7171297   | 7171811   | 2.66 | NEURL4     | chr17 | - | 1808  | NM_032442    |
| WT_D3A | 3492 | 35022504  | 35023171  | 3.12 | NEUROD2    | chr17 | - | -5136 | NM_006160    |

|        |      |           |           |      |        |       |   |       |              |
|--------|------|-----------|-----------|------|--------|-------|---|-------|--------------|
| WT_D3A | 4243 | 52459910  | 52460059  | 2.48 | NISCH  | chr3  | + | -4579 | NM_007184    |
| WT_D3A | 4022 | 61361632  | 61362271  | 2.74 | NKAIN4 | chr20 | - | -5614 | NM_152864    |
| WT_D3A | 4396 | 28335215  | 28335434  | 2.37 | NKAPL  | chr6  | + | 248   | NM_001007531 |
| WT_D3A | 4339 | 1060477   | 1061026   | 2.6  | NKD2   | chr5  | + | -1416 | NM_033120    |
| WT_D3A | 4588 | 23595110  | 23595240  | 2.72 | NKX3-1 | chr8  | - | 1220  | NM_006167    |
| WT_D3A | 4595 | 41626855  | 41628414  | 2.35 | NKX6-3 | chr8  | - | -3599 | NM_152568    |
| WT_D3A | 4828 | 70283859  | 70283993  | 2.66 | NLGN3  | chrX  | + | 2521  | NM_001166660 |
| WT_D3A | 3970 | 35580035  | 35580769  | 2.41 | NNAT   | chr20 | + | -2618 | NM_181689    |
| WT_D3A | 2646 | 882242    | 883291    | 4.08 | NOC2L  | chr1  | - | 1776  | NM_015658    |
| WT_D3A | 3115 | 131196408 | 131196672 | 2.58 | NOC4L  | chr12 | + | 1595  | NM_024078    |
| WT_D3A | 2674 | 6538355   | 6538504   | 2.68 | NOL9   | chr1  | - | -1261 | NM_024654    |
| WT_D3A | 2845 | 103896631 | 103896970 | 2.73 | NOLC1  | chr10 | + | -5122 | NM_004741    |
| WT_D3A | 4370 | 175752460 | 175753829 | 3.43 | NOP16  | chr5  | - | -4998 | NM_016391    |
| WT_D3A | 4777 | 138557091 | 138557620 | 4.78 | NOTCH1 | chr9  | - | 2704  | NM_017617    |
| WT_D3A | 3090 | 52184756  | 52185790  | 2.74 | NPFF   | chr12 | - | 2416  | NM_003717    |
| WT_D3A | 3735 | 41031602  | 41032336  | 2.99 | NPHS1  | chr19 | - | 2766  | NM_004646    |
| WT_D3A | 4581 | 21938433  | 21939357  | 4.57 | NPM2   | chr8  | + | 596   | NM_182795    |
| WT_D3A | 3701 | 17221673  | 17222002  | 2.16 | NR2F6  | chr19 | - | -4686 | NM_005234    |
| WT_D3A | 4705 | 126308855 | 126309294 | 3.28 | NR5A1  | chr9  | - | 446   | NM_004959    |
| WT_D3A | 4797 | 139321465 | 139323256 | 3.03 | NRARP  | chr9  | - | -5836 | NM_001004354 |
| WT_D3A | 3365 | 66473801  | 66475140  | 2.62 | NRN1L  | chr16 | + | -1811 | NM_198443    |
| WT_D3A | 3364 | 66472016  | 66472630  | 3.47 | NRN1L  | chr16 | + | -3958 | NM_198443    |
| WT_D3A | 4837 | 151743190 | 151744541 | 3.63 | NSDHL  | chrX  | + | -6301 | NM_015922    |
| WT_D3A | 2729 | 46579307  | 46581134  | 4.44 | NSUN4  | chr1  | + | 1244  | NM_199044    |
| WT_D3A | 3328 | 15055366  | 15056411  | 2.72 | NTAN1  | chr16 | - | 1446  | NM_173474    |
| WT_D3A | 2757 | 155090302 | 155090946 | 2.77 | NTRK1  | chr1  | + | -6670 | NM_001012331 |
| WT_D3A | 4011 | 60806166  | 60806485  | 3.2  | NTSR1  | chr20 | + | -4308 | NM_002531    |
| WT_D3A | 4012 | 60808744  | 60809883  | 2.56 | NTSR1  | chr20 | + | -1320 | NM_002531    |
| WT_D3A | 4013 | 60812364  | 60813598  | 2.81 | NTSR1  | chr20 | + | 2348  | NM_002531    |
| WT_D3A | 3300 | 1771512   | 1771866   | 3.07 | NUBP2  | chr16 | + | -1244 | NM_012225    |
| WT_D3A | 3299 | 1769444   | 1769588   | 2.1  | NUBP2  | chr16 | + | -3417 | NM_012225    |
| WT_D3A | 3777 | 54090250  | 54090619  | 3.71 | NUCB1  | chr19 | + | -5418 | NM_006184    |
| WT_D3A | 4465 | 2245332   | 2245596   | 2.45 | NUDT1  | chr7  | + | -2918 | NM_198949    |
| WT_D3A | 4465 | 2245332   | 2245596   | 2.45 | NUDT1  | chr7  | + | -3601 | NM_198954    |
| WT_D3A | 4465 | 2245332   | 2245596   | 2.45 | NUDT1  | chr7  | + | -2957 | NM_198952    |
| WT_D3A | 3222 | 104716302 | 104716751 | 2.42 | NUDT14 | chr14 | - | 2179  | NM_177533    |
| WT_D3A | 2991 | 63747212  | 63748069  | 2.43 | NUDT22 | chr11 | + | -2673 | NM_001128613 |
| WT_D3A | 3030 | 67155670  | 67158249  | 3.07 | NUDT8  | chr11 | - | -2982 | NM_181843    |
| WT_D3A | 3038 | 71470189  | 71470340  | 2.4  | NUMA1  | chr11 | - | -1043 | NM_006185    |
| WT_D3A | 3183 | 72995674  | 72995798  | 2.48 | NUMB   | chr14 | - | -697  | NM_001005745 |
| WT_D3A | 3753 | 45891981  | 45892744  | 3.25 | NUMBL  | chr19 | - | -3966 | NM_004756    |
| WT_D3A | 3336 | 28455807  | 28456826  | 3.39 | NUPR1  | chr16 | - | 1680  | NM_012385    |
| WT_D3A | 3337 | 28457604  | 28458258  | 3.34 | NUPR1  | chr16 | - | 65    | NM_012385    |
| WT_D3A | 3520 | 45005510  | 45006644  | 3.23 | NXP3   | chr17 | + | -2219 | NM_007225    |
| WT_D3A | 3095 | 55889868  | 55890502  | 3.24 | NXP4   | chr12 | + | -6659 | NM_007224    |
| WT_D3A | 3700 | 17191045  | 17191779  | 3.13 | OCEL1  | chr19 | + | -6642 | NM_024578    |
| WT_D3A | 3843 | 10510854  | 10511296  | 2.53 | ODC1   | chr2  | - | -5171 | NM_002539    |



|        |      |           |           |      |         |       |   |       |              |
|--------|------|-----------|-----------|------|---------|-------|---|-------|--------------|
| WT_D3A | 3618 | 430998    | 431349    | 2.22 | ODF3L2  | chr19 | - | -5190 | NM_182577    |
| WT_D3A | 4015 | 60901679  | 60901848  | 2.39 | OGFR    | chr20 | + | -4858 | NM_007346    |
| WT_D3A | 3044 | 76488936  | 76490191  | 2.69 | OMP     | chr11 | + | -1970 | NM_006189    |
| WT_D3A | 3766 | 50785877  | 50786656  | 2.37 | OPA3    | chr19 | - | -6304 | NM_001017989 |
| WT_D3A | 4646 | 145190631 | 145190898 | 2.22 | OPLAH   | chr8  | - | -3192 | NM_017570    |
| WT_D3A | 4852 | 153057626 | 153057845 | 2.49 | OPN1LW  | chrX  | + | -5183 | NM_020061    |
| WT_D3A | 2833 | 88406885  | 88407324  | 2.39 | OPN4    | chr10 | + | 2811  | NM_033282    |
| WT_D3A | 4036 | 62176732  | 62177391  | 2.79 | OPRL1   | chr20 | + | -4870 | NM_000913    |
| WT_D3A | 4537 | 143457372 | 143457501 | 2.19 | OR2A14  | chr7  | + | 298   | NM_001001659 |
| WT_D3A | 4524 | 101857229 | 101857478 | 2.33 | ORAI2   | chr7  | + | -3647 | NM_032831    |
| WT_D3A | 4002 | 60239614  | 60240068  | 2.41 | OSBPL2  | chr20 | + | -7133 | NM_144498    |
| WT_D3A | 3807 | 59301788  | 59303853  | 3.12 | OSCAR   | chr19 | - | -6860 | NM_133168    |
| WT_D3A | 3851 | 26556914  | 26557198  | 2.8  | OTOF    | chr2  | - | -2642 | NM_194323    |
| WT_D3A | 3852 | 26560266  | 26560937  | 2.77 | OTOF    | chr2  | - | -6187 | NM_194323    |
| WT_D3A | 3863 | 42847831  | 42848265  | 2.22 | OXER1   | chr2  | - | -3143 | NM_148962    |
| WT_D3A | 3583 | 77417853  | 77418407  | 2.89 | P4HB    | chr17 | - | -6297 | NM_000918    |
| WT_D3A | 4172 | 41671326  | 41671540  | 2.39 | PACSLN2 | chr22 | - | 1558  | NM_007229    |
| WT_D3A | 2662 | 2446097   | 2446641   | 3.49 | PANK4   | chr1  | - | 1526  | NM_018216    |
| WT_D3A | 3313 | 2960791   | 2962470   | 4.26 | PAQR4   | chr16 | + | 2288  | NM_152341    |
| WT_D3A | 2756 | 154485663 | 154487312 | 3.82 | PAQR6   | chr1  | - | -2071 | NM_198406    |
| WT_D3A | 2756 | 154485663 | 154487312 | 3.82 | PAQR6   | chr1  | - | -2020 | NM_024897    |
| WT_D3A | 3363 | 66253184  | 66253718  | 2.89 | PARD6A  | chr16 | + | 1100  | NM_016948    |
| WT_D3A | 3616 | 76109895  | 76110159  | 3.12 | PARD6G  | chr18 | - | -3639 | NM_032510    |
| WT_D3A | 4645 | 145129215 | 145130159 | 2.64 | PARP10  | chr8  | - | 2936  | NM_032789    |
| WT_D3A | 4238 | 51946762  | 51946981  | 2.22 | PARP3   | chr3  | + | -4529 | NM_001003931 |
| WT_D3A | 4239 | 51953232  | 51953501  | 2.32 | PARP3   | chr3  | + | 1966  | NM_001003931 |
| WT_D3A | 4177 | 42749520  | 42749949  | 3.16 | PARVB   | chr22 | + | -1766 | NM_013327    |
| WT_D3A | 3943 | 241741556 | 241741961 | 3.61 | PASK    | chr2  | - | -4207 | NM_015148    |
| WT_D3A | 2819 | 72316322  | 72316766  | 2.76 | PCBD1   | chr10 | - | 2003  | NM_000281    |
| WT_D3A | 3132 | 57104859  | 57105123  | 2.72 | PCDH17  | chr13 | + | 1202  | NM_001040429 |
| WT_D3A | 4359 | 140850855 | 140851224 | 2.89 | PCDHGC5 | chr5  | + | 2048  | NM_018929    |
| WT_D3A | 3012 | 65141498  | 65141951  | 3.46 | PCNXL3  | chr11 | + | 1366  | NM_032223    |
| WT_D3A | 3656 | 7601442   | 7601701   | 3.19 | PCP2    | chr19 | - | 2999  | NM_174895    |
| WT_D3A | 3946 | 242446800 | 242447355 | 2.51 | PDCD1   | chr2  | - | 2654  | NM_005018    |
| WT_D3A | 3728 | 39582176  | 39582795  | 2.33 | PDCD2L  | chr19 | + | -4657 | NM_032346    |
| WT_D3A | 3580 | 77233402  | 77235024  | 3.2  | PDE6G   | chr17 | - | -201  | NM_002602    |
| WT_D3A | 4060 | 42944543  | 42945612  | 3.32 | PDE9A   | chr21 | + | -1853 | NM_001001569 |
| WT_D3A | 2838 | 97041688  | 97041847  | 2.24 | PDLIM1  | chr10 | - | -996  | NM_020992    |
| WT_D3A | 3309 | 2526112   | 2526682   | 2.34 | PDPK1   | chr16 | + | -1573 | NM_031268    |
| WT_D3A | 4072 | 43966234  | 43966658  | 2.39 | PDXK    | chr21 | + | 3041  | NM_003681    |
| WT_D3A | 4845 | 152750164 | 152751093 | 3.43 | PDZD4   | chrX  | - | -1431 | NM_032512    |
| WT_D3A | 3531 | 59814744  | 59815480  | 4.59 | PECAM1  | chr17 | - | 2631  | NM_000442    |
| WT_D3A | 3448 | 4556188   | 4556719   | 3.9  | PELP1   | chr17 | - | -2072 | NM_014389    |
| WT_D3A | 2660 | 2338596   | 2338945   | 2.72 | PEX10   | chr1  | - | -4900 | NM_153818    |
| WT_D3A | 2974 | 45893083  | 45893424  | 2.29 | PEX16   | chr11 | - | 2997  | NM_057174    |
| WT_D3A | 4266 | 181239744 | 181239888 | 2.34 | PEX5L   | chr3  | - | -2605 | NM_016559    |
| WT_D3A | 4081 | 44539209  | 44539543  | 3.19 | PFKL    | chr21 | + | -4981 | NM_002626    |

|        |      |           |           |      |          |       |   |       |              |
|--------|------|-----------|-----------|------|----------|-------|---|-------|--------------|
| WT_D3A | 4081 | 44539209  | 44539543  | 3.19 | PFKL     | chr21 | + | -4976 | NR_024108    |
| WT_D3A | 4373 | 176757306 | 176757455 | 2.24 | PFN3     | chr5  | - | 2863  | NM_001029886 |
| WT_D3A | 4484 | 44070710  | 44071359  | 3.21 | PGAM2    | chr7  | - | 677   | NM_000290    |
| WT_D3A | 3704 | 17477019  | 17477658  | 2.11 | PGLS     | chr19 | + | -6093 | NM_012088    |
| WT_D3A | 3769 | 51216558  | 51217792  | 3.11 | PGLYRP1  | chr19 | - | 988   | NM_005091    |
| WT_D3A | 2713 | 33617574  | 33617826  | 2.68 | PHC2     | chr1  | - | -3919 | NM_198040    |
| WT_D3A | 3237 | 38424557  | 38424924  | 2.06 | PHGR1    | chr15 | + | -5785 | NM_001145643 |
| WT_D3A | 3039 | 71638581  | 71640200  | 3.09 | PHOX2A   | chr11 | - | -6522 | NM_005169    |
| WT_D3A | 4275 | 480007    | 481253    | 2.58 | PIGG     | chr4  | + | -2358 | NM_017733    |
| WT_D3A | 4664 | 35090951  | 35091305  | 2.1  | PIGO     | chr9  | - | -4549 | NM_152850    |
| WT_D3A | 4664 | 35090951  | 35091305  | 2.1  | PIGO     | chr9  | - | -4582 | NM_032634    |
| WT_D3A | 3786 | 54645678  | 54646040  | 2.2  | PIH1D1   | chr19 | - | 1068  | NM_017916    |
| WT_D3A | 4515 | 99810009  | 99810980  | 4.29 | PILRA    | chr7  | + | 1491  | NM_178272    |
| WT_D3A | 2837 | 95711303  | 95711462  | 2.04 | PIPSL    | chr10 | - | 280   | NR_002319    |
| WT_D3A | 4141 | 30353065  | 30354109  | 2.95 | PISD     | chr22 | - | 3223  | NM_014338    |
| WT_D3A | 3315 | 2975776   | 2976547   | 3.01 | PKMYT1   | chr16 | - | -5686 | NM_004203    |
| WT_D3A | 3314 | 2971807   | 2972256   | 2.18 | PKMYT1   | chr16 | - | -1556 | NM_004203    |
| WT_D3A | 4713 | 130507327 | 130507771 | 2.54 | PKN3     | chr9  | + | 2927  | NM_013355    |
| WT_D3A | 4712 | 130505455 | 130506594 | 2.6  | PKN3     | chr9  | + | 1402  | NM_013355    |
| WT_D3A | 3244 | 40237811  | 40238190  | 2.09 | PLA2G4F  | chr15 | - | -1898 | NM_213600    |
| WT_D3A | 3450 | 4659906   | 4660460   | 3.48 | PLD2     | chr17 | + | 2806  | NM_002663    |
| WT_D3A | 3449 | 4650801   | 4651570   | 2.3  | PLD2     | chr17 | + | -6192 | NM_002663    |
| WT_D3A | 3471 | 17047257  | 17047411  | 2.27 | PLD6     | chr17 | - | 3037  | NM_178836    |
| WT_D3A | 4645 | 145129215 | 145130159 | 2.64 | PLEC1    | chr8  | - | -6786 | NM_000445    |
| WT_D3A | 4644 | 145117650 | 145118599 | 2.58 | PLEC1    | chr8  | - | 1561  | NM_201378    |
| WT_D3A | 3776 | 54061851  | 54062875  | 2.52 | PLEKHA4  | chr19 | - | 1333  | NM_020904    |
| WT_D3A | 2968 | 16993962  | 16994615  | 3.28 | PLEKHA7  | chr11 | - | -1749 | NM_175058    |
| WT_D3A | 4522 | 100652294 | 100652931 | 2.36 | PLOD3    | chr7  | - | -4881 | NM_001084    |
| WT_D3A | 4227 | 48442758  | 48443082  | 2.62 | PLXNB1   | chr3  | - | 2956  | NM_002673    |
| WT_D3A | 3902 | 218838096 | 218839176 | 2.26 | PNKD     | chr2  | + | -4722 | NM_015488    |
| WT_D3A | 4800 | 139561239 | 139561993 | 2.22 | PNPLA7   | chr9  | - | 3191  | NM_152286    |
| WT_D3A | 4801 | 139570276 | 139570615 | 2.83 | PNPLA7   | chr9  | - | -5638 | NM_152286    |
| WT_D3A | 3350 | 31014262  | 31014891  | 2.97 | POL3S    | chr16 | - | -6945 | NM_001039503 |
| WT_D3A | 3466 | 7321445   | 7322819   | 3.18 | POLR2A   | chr17 | + | -6441 | NM_000937    |
| WT_D3A | 4269 | 185557889 | 185558428 | 2.14 | POLR2H   | chr3  | + | -5729 | NM_006232    |
| WT_D3A | 4733 | 133153423 | 133154272 | 2.02 | PPAPDC3  | chr9  | + | -1054 | NM_032728    |
| WT_D3A | 4187 | 44921888  | 44923630  | 4.58 | PPARA    | chr22 | + | -2403 | NM_001001928 |
| WT_D3A | 4430 | 109874564 | 109875270 | 2.16 | PPIL6    | chr6  | - | -6377 | NM_001111298 |
| WT_D3A | 3025 | 66922729  | 66923348  | 3.34 | PPP1CA   | chr11 | - | 2914  | NM_206873    |
| WT_D3A | 3740 | 43435839  | 43436614  | 3.02 | PPP1R14A | chr19 | - | 2786  | NM_033256    |
| WT_D3A | 3776 | 54061851  | 54062875  | 2.52 | PPP1R15A | chr19 | + | -5097 | NM_014330    |
| WT_D3A | 3943 | 241741556 | 241741961 | 3.61 | PPP1R7   | chr2  | + | 3184  | NM_002712    |
| WT_D3A | 2866 | 133593984 | 133594400 | 3.04 | PPP2R2D  | chr10 | + | -3757 | NM_018461    |
| WT_D3A | 3770 | 51544557  | 51544916  | 2.32 | PPP5C    | chr19 | + | 2603  | NM_006247    |
| WT_D3A | 4123 | 21229226  | 21229601  | 2.51 | PRAME    | chr22 | - | 2283  | NM_206953    |
| WT_D3A | 4123 | 21229226  | 21229601  | 2.51 | PRAME    | chr22 | - | 2137  | NM_206956    |
| WT_D3A | 3548 | 72050080  | 72050743  | 2.73 | PRCD     | chr17 | + | 2696  | NM_001077620 |

|        |      |           |           |      |        |       |   |       |              |
|--------|------|-----------|-----------|------|--------|-------|---|-------|--------------|
| WT_D3A | 4054 | 42177909  | 42178152  | 2.7  | PRDM15 | chr21 | - | -5370 | NM_022115    |
| WT_D3A | 4054 | 42177909  | 42178152  | 2.7  | PRDM15 | chr21 | - | -5379 | NM_001040424 |
| WT_D3A | 4327 | 81330689  | 81331677  | 3.08 | PRDM8  | chr4  | + | -6497 | NM_001099403 |
| WT_D3A | 2994 | 63838586  | 63839335  | 2.66 | PRDX5  | chr11 | + | -3184 | NM_181652    |
| WT_D3A | 4556 | 151141394 | 151141933 | 3.48 | PRKAG2 | chr7  | - | 1227  | NM_001040633 |
| WT_D3A | 3927 | 238140188 | 238140322 | 3.24 | PRLH   | chr2  | + | 300   | NM_015893    |
| WT_D3A | 3326 | 11274458  | 11275102  | 3    | PRM2   | chr16 | - | 3058  | NM_002762    |
| WT_D3A | 3326 | 11274458  | 11275102  | 3    | PRM3   | chr16 | - | 173   | NM_021247    |
| WT_D3A | 3873 | 95306129  | 95307594  | 2.41 | PROM2  | chr2  | + | 2934  | NM_144707    |
| WT_D3A | 3807 | 59301788  | 59303853  | 3.12 | PRPF31 | chr19 | + | -7781 | NM_015629    |
| WT_D3A | 3131 | 56627576  | 56628170  | 3.09 | PRR20A | chr13 | + | -4893 | NM_198441    |
| WT_D3A | 3131 | 56627576  | 56628170  | 3.09 | PRR20A | chr13 | + | 1678  | NM_198441    |
| WT_D3A | 3131 | 56627576  | 56628170  | 3.09 | PRR20B | chr13 | + | 1678  | NM_001130404 |
| WT_D3A | 3131 | 56627576  | 56628170  | 3.09 | PRR20B | chr13 | + | -4893 | NM_001130404 |
| WT_D3A | 3131 | 56627576  | 56628170  | 3.09 | PRR20C | chr13 | + | -4893 | NM_001130405 |
| WT_D3A | 3131 | 56627576  | 56628170  | 3.09 | PRR20C | chr13 | + | 1678  | NM_001130405 |
| WT_D3A | 3131 | 56627576  | 56628170  | 3.09 | PRR20D | chr13 | + | 1678  | NM_001130406 |
| WT_D3A | 3131 | 56627576  | 56628170  | 3.09 | PRR20D | chr13 | + | -4893 | NM_001130406 |
| WT_D3A | 3131 | 56627576  | 56628170  | 3.09 | PRR20E | chr13 | + | -4893 | NM_001130407 |
| WT_D3A | 3131 | 56627576  | 56628170  | 3.09 | PRR20E | chr13 | + | 1678  | NM_001130407 |
| WT_D3A | 3654 | 5733811   | 5734260   | 2.27 | PRR22  | chr19 | - | 1575  | NM_153359    |
| WT_D3A | 3654 | 5733811   | 5734260   | 2.27 | PRR22  | chr19 | - | 1741  | NM_001134316 |
| WT_D3A | 3289 | 793374    | 793723    | 2.82 | PRR25  | chr16 | + | -1895 | NM_001013638 |
| WT_D3A | 3341 | 29728578  | 29728817  | 2.56 | PRRT2  | chr16 | + | -2212 | NM_145239    |
| WT_D3A | 2785 | 226070665 | 226072038 | 2.66 | PRSS38 | chr1  | + | 1311  | NM_183062    |
| WT_D3A | 2846 | 104166905 | 104167069 | 2.42 | PSD    | chr10 | - | 1904  | NM_002779    |
| WT_D3A | 3367 | 66534088  | 66534227  | 2.11 | PSMB10 | chr16 | - | -5903 | NM_002801    |
| WT_D3A | 4527 | 102770969 | 102771198 | 2.21 | PSMC2  | chr7  | + | -4241 | NM_002803    |
| WT_D3A | 3743 | 43550196  | 43550325  | 2.26 | PSMD8  | chr19 | + | -6769 | NM_002812    |
| WT_D3A | 3173 | 23690790  | 23691029  | 2.01 | PSME2  | chr14 | - | -5214 | NM_002818    |
| WT_D3A | 4727 | 131557274 | 131557423 | 2.59 | PTGES  | chr9  | - | -2183 | NM_004878    |
| WT_D3A | 3075 | 6933687   | 6936514   | 4.27 | PTPN6  | chr12 | + | 4406  | NM_002831    |
| WT_D3A | 3823 | 60412555  | 60413019  | 2.36 | PTPRH  | chr19 | - | -101  | NM_001161440 |
| WT_D3A | 3112 | 130973450 | 130974124 | 2.29 | PUS1   | chr12 | + | -5910 | NM_001002020 |
| WT_D3A | 3112 | 130973450 | 130974124 | 2.29 | PUS1   | chr12 | + | -5963 | NM_001002019 |
| WT_D3A | 3112 | 130973450 | 130974124 | 2.29 | PUS1   | chr12 | + | -5978 | NM_025215    |
| WT_D3A | 2782 | 224175997 | 224176126 | 2.58 | PYCR2  | chr1  | - | 2527  | NM_013328    |
| WT_D3A | 4640 | 144765619 | 144766563 | 2.87 | PYCR1  | chr8  | - | -3184 | NM_023078    |
| WT_D3A | 4233 | 49123149  | 49123878  | 2.89 | QARS   | chr3  | - | -6338 | NM_005051    |
| WT_D3A | 3976 | 42398845  | 42399419  | 2.72 | R3HDML | chr20 | + | 93    | NM_178491    |
| WT_D3A | 3928 | 238170865 | 238171024 | 2.34 | RAB17  | chr2  | - | -6469 | NM_022449    |
| WT_D3A | 3016 | 65786490  | 65786742  | 2.45 | RAB1B  | chr11 | + | -6015 | NM_030981    |
| WT_D3A | 3017 | 65790115  | 65791029  | 2.87 | RAB1B  | chr11 | + | -2059 | NM_030981    |
| WT_D3A | 3288 | 582216    | 582590    | 3.01 | RAB40C | chr16 | + | 2224  | NM_021168    |
| WT_D3A | 3584 | 77575827  | 77575961  | 2.68 | RAC3   | chr17 | + | -6926 | NM_005052    |
| WT_D3A | 4743 | 135018644 | 135019593 | 2.78 | RALGDS | chr9  | - | -4709 | NM_001042368 |
| WT_D3A | 4744 | 135020422 | 135021069 | 2.34 | RALGDS | chr9  | - | -6336 | NM_001042368 |

|        |      |           |           |      |           |       |   |       |              |
|--------|------|-----------|-----------|------|-----------|-------|---|-------|--------------|
| WT_D3A | 4740 | 134988372 | 134988816 | 3    | RALGDS    | chr9  | - | -2212 | NM_006266    |
| WT_D3A | 4741 | 134992799 | 134993743 | 2.58 | RALGDS    | chr9  | - | -6889 | NM_006266    |
| WT_D3A | 4739 | 134984497 | 134985136 | 3.87 | RALGDS    | chr9  | - | 1566  | NM_006266    |
| WT_D3A | 3666 | 10306729  | 10307555  | 3.07 | RAVER1    | chr19 | - | -1828 | NM_133452    |
| WT_D3A | 4865 | 22079194  | 22079363  | 2.17 | RBMY1A1   | chrY  | + | -3367 | NM_005058    |
| WT_D3A | 4865 | 22079194  | 22079363  | 2.17 | RBMY1B    | chrY  | + | -3367 | NM_001006121 |
| WT_D3A | 4865 | 22079194  | 22079363  | 2.17 | RBMY1D    | chrY  | + | -3373 | NM_001006120 |
| WT_D3A | 4865 | 22079194  | 22079363  | 2.17 | RBMY1E    | chrY  | + | -3373 | NM_001006118 |
| WT_D3A | 3076 | 7172040   | 7172399   | 2.14 | RBP5      | chr12 | - | 514   | NM_031491    |
| WT_D3A | 4402 | 32038368  | 32039410  | 2.9  | RDBP      | chr6  | - | -4046 | NM_002904    |
| WT_D3A | 3663 | 9978952   | 9979416   | 2.4  | RDH8      | chr19 | + | -5740 | NM_015725    |
| WT_D3A | 3542 | 71181263  | 71181888  | 2.39 | RECQL5    | chr17 | - | -6711 | NM_001003715 |
| WT_D3A | 3542 | 71181263  | 71181888  | 2.39 | RECQL5    | chr17 | - | -6715 | NM_004259    |
| WT_D3A | 4585 | 22061645  | 22062394  | 3.16 | REEP4     | chr8  | - | -6626 | NM_025232    |
| WT_D3A | 2659 | 2305728   | 2306109   | 3.39 | RER1      | chr1  | + | -7155 | NM_007033    |
| WT_D3A | 3630 | 1796967   | 1797226   | 2.62 | REXO1     | chr19 | - | 2356  | NM_020695    |
| WT_D3A | 4746 | 135269210 | 135270101 | 2.94 | REXO4     | chr9  | - | 3330  | NM_020385    |
| WT_D3A | 4747 | 135274139 | 135274678 | 4.21 | REXO4     | chr9  | - | -1423 | NM_020385    |
| WT_D3A | 3586 | 77606132  | 77607375  | 3.7  | RFNG      | chr17 | - | -3814 | NM_002917    |
| WT_D3A | 4137 | 28173308  | 28173759  | 2.54 | RFPL1S    | chr22 | - | -5415 | NR_002727    |
| WT_D3A | 4145 | 30932977  | 30933136  | 2.47 | RFPL2     | chr22 | - | -2338 | NM_001159545 |
| WT_D3A | 4145 | 30932977  | 30933136  | 2.47 | RFPL2     | chr22 | - | -3592 | NM_001098527 |
| WT_D3A | 4145 | 30932977  | 30933136  | 2.47 | RFPL2     | chr22 | - | -4519 | NM_001159546 |
| WT_D3A | 4148 | 31080587  | 31080821  | 2.56 | RFPL3     | chr22 | + | -3149 | NM_001098535 |
| WT_D3A | 4148 | 31080587  | 31080821  | 2.56 | RFPL3     | chr22 | + | -167  | NM_006604    |
| WT_D3A | 4125 | 22363757  | 22363883  | 2.41 | RGL4      | chr22 | + | 773   | NM_153615    |
| WT_D3A | 4300 | 3278692   | 3279023   | 2.53 | RGS12     | chr4  | + | -6814 | NM_198229    |
| WT_D3A | 4301 | 3336450   | 3336999   | 3.1  | RGS12     | chr4  | + | -4797 | NM_198227    |
| WT_D3A | 4257 | 130729388 | 130729532 | 3    | RHO       | chr3  | + | -711  | NM_000539    |
| WT_D3A | 3175 | 23876962  | 23877521  | 2.61 | RIPK3     | chr14 | - | 1841  | NM_006871    |
| WT_D3A | 4376 | 177483596 | 177485111 | 4.68 | RMND5B    | chr5  | + | -6280 | NM_022762    |
| WT_D3A | 3459 | 6854211   | 6854755   | 2.99 | RNASEK    | chr17 | + | -2038 | NM_001004333 |
| WT_D3A | 3506 | 38423924  | 38424068  | 2.54 | RND2      | chr17 | + | -6787 | NM_005440    |
| WT_D3A | 3453 | 4786989   | 4787448   | 3.06 | RNF167    | chr17 | + | 2844  | NM_015528    |
| WT_D3A | 3452 | 4781575   | 4781949   | 2.49 | RNF167    | chr17 | + | -2612 | NM_015528    |
| WT_D3A | 3308 | 2261033   | 2261167   | 2.94 | RNPS1     | chr16 | - | -3302 | NM_006711    |
| WT_D3A | 3308 | 2261033   | 2261167   | 2.94 | RNPS1     | chr16 | - | -2985 | NM_080594    |
| WT_D3A | 4166 | 38039227  | 38040496  | 2.7  | RNU86     | chr22 | - | 2986  | NR_000026    |
| WT_D3A | 3321 | 4793954   | 4794603   | 2.77 | ROGDI     | chr16 | - | -1603 | NM_024589    |
| WT_D3A | 2985 | 62130341  | 62130555  | 2.47 | ROM1      | chr11 | + | -6340 | NM_000327    |
| WT_D3A | 3491 | 34603225  | 34605199  | 2.66 | RPL19     | chr17 | + | -5849 | NM_000981    |
| WT_D3A | 4566 | 169534    | 169881    | 2.27 | RPL23AP53 | chr8  | - | 2611  | NR_003572    |
| WT_D3A | 3828 | 60582136  | 60582295  | 2.37 | RPL28     | chr19 | + | -6896 | NM_001136135 |
| WT_D3A | 3829 | 60590644  | 60591583  | 2.94 | RPL28     | chr19 | + | 2002  | NM_001136135 |
| WT_D3A | 4211 | 12855163  | 12855611  | 2.29 | RPL32     | chr3  | - | 2694  | NM_001007073 |
| WT_D3A | 4211 | 12855163  | 12855611  | 2.29 | RPL32     | chr3  | - | 1562  | NM_001007074 |
| WT_D3A | 3652 | 5635519   | 5635983   | 2.28 | RPL36     | chr19 | + | -5594 | NM_015414    |

|        |      |           |           |      |         |       |   |       |              |
|--------|------|-----------|-----------|------|---------|-------|---|-------|--------------|
| WT_D3A | 3653 | 5643538   | 5643667   | 2.83 | RPL36   | chr19 | + | 2257  | NM_015414    |
| WT_D3A | 3652 | 5635519   | 5635983   | 2.28 | RPL36   | chr19 | + | -5520 | NM_033643    |
| WT_D3A | 3653 | 5643538   | 5643667   | 2.83 | RPL36   | chr19 | + | 2331  | NM_033643    |
| WT_D3A | 3533 | 69708601  | 69708765  | 2.55 | RPL38   | chr17 | + | -2706 | NM_001035258 |
| WT_D3A | 4660 | 145986688 | 145986847 | 2.34 | RPL8    | chr8  | - | 1766  | NM_033301    |
| WT_D3A | 4660 | 145986688 | 145986847 | 2.34 | RPL8    | chr8  | - | 1842  | NM_000973    |
| WT_D3A | 2807 | 15175304  | 15175964  | 2.42 | RPP38   | chr10 | + | -3553 | NM_006414    |
| WT_D3A | 3516 | 42409000  | 42409864  | 2.93 | RPRML   | chr17 | - | 2181  | NM_203400    |
| WT_D3A | 3788 | 54685978  | 54686142  | 2.49 | RPS11   | chr19 | + | -5385 | NM_001015    |
| WT_D3A | 3748 | 44615540  | 44615774  | 2.97 | RPS16   | chr19 | - | 2801  | NM_001020    |
| WT_D3A | 2995 | 63876266  | 63877385  | 3.83 | RPS6KA4 | chr11 | + | -6375 | NM_003942    |
| WT_D3A | 3026 | 66947245  | 66947494  | 2.51 | RPS6KB2 | chr11 | + | -5141 | NM_003952    |
| WT_D3A | 3184 | 74456049  | 74456988  | 4.05 | RPS6KL1 | chr14 | - | 2380  | NM_031464    |
| WT_D3A | 2966 | 6587500   | 6587664   | 2.18 | RRP8    | chr11 | - | -6195 | NM_015324    |
| WT_D3A | 4239 | 51953232  | 51953501  | 2.32 | RRP9    | chr3  | - | -2404 | NM_004704    |
| WT_D3A | 3765 | 50689743  | 50689987  | 2.59 | RTN2    | chr19 | - | 2288  | NM_206900    |
| WT_D3A | 3765 | 50689743  | 50689987  | 2.59 | RTN2    | chr19 | - | -1551 | NM_206901    |
| WT_D3A | 3765 | 50689743  | 50689987  | 2.59 | RTN2    | chr19 | - | 2286  | NM_005619    |
| WT_D3A | 4270 | 188900939 | 188901130 | 2.03 | RTP2    | chr3  | - | 2005  | NM_001004312 |
| WT_D3A | 2700 | 25134581  | 25135422  | 2.64 | RUNX3   | chr1  | - | -5644 | NM_004350    |
| WT_D3A | 2701 | 25170235  | 25171062  | 3.71 | RUNX3   | chr1  | - | -6560 | NM_001031680 |
| WT_D3A | 2755 | 153561778 | 153561927 | 2.87 | RUSC1   | chr1  | + | 1011  | NM_014328    |
| WT_D3A | 2755 | 153561778 | 153561927 | 2.87 | RUSC1   | chr1  | + | 1501  | NM_001105205 |
| WT_D3A | 4256 | 129326023 | 129326546 | 3.38 | RUVBL1  | chr3  | - | -923  | NM_003707    |
| WT_D3A | 2748 | 151850348 | 151850817 | 3.75 | S100A16 | chr1  | - | 1556  | NM_080388    |
| WT_D3A | 2746 | 151810674 | 151811311 | 4.28 | S100A2  | chr1  | - | -6062 | NM_005978    |
| WT_D3A | 4311 | 6745202   | 6746276   | 3.67 | S100P   | chr4  | + | -727  | NM_005980    |
| WT_D3A | 2735 | 101477373 | 101478212 | 4.02 | S1PR1   | chr1  | + | 2900  | NM_001400    |
| WT_D3A | 2640 | 845694    | 845938    | 2.49 | SAMD11  | chr1  | + | -5167 | NM_152486    |
| WT_D3A | 3521 | 45567890  | 45568519  | 2.43 | SAMD14  | chr17 | - | -6038 | NM_174920    |
| WT_D3A | 3747 | 44526777  | 44527311  | 2.64 | SAMD4B  | chr19 | + | 2097  | NM_018028    |
| WT_D3A | 4204 | 49262421  | 49262580  | 2.5  | SBF1    | chr22 | - | -2170 | NM_002972    |
| WT_D3A | 3626 | 1122890   | 1123139   | 2.59 | SBNO2   | chr19 | - | 2268  | NM_014963    |
| WT_D3A | 3262 | 82968725  | 82969179  | 3.03 | SCAND2  | chr15 | + | -6742 | NR_003654    |
| WT_D3A | 4386 | 179953398 | 179953632 | 3.29 | SCGB3A1 | chr5  | - | -2422 | NM_052863    |
| WT_D3A | 4387 | 179957557 | 179957714 | 2.27 | SCGB3A1 | chr5  | - | -6542 | NM_052863    |
| WT_D3A | 3729 | 40206399  | 40207448  | 3.16 | SCN1B   | chr19 | + | -6508 | NM_001037    |
| WT_D3A | 3067 | 6354372   | 6355141   | 3.57 | SCNN1A  | chr12 | - | -105  | NM_001159576 |
| WT_D3A | 3067 | 6354372   | 6355141   | 3.57 | SCNN1A  | chr12 | - | 410   | NM_001038    |
| WT_D3A | 3067 | 6354372   | 6355141   | 3.57 | SCNN1A  | chr12 | - | 2028  | NM_001159575 |
| WT_D3A | 2649 | 1206601   | 1206740   | 2.04 | SCNN1D  | chr1  | + | -768  | NM_002978    |
| WT_D3A | 2649 | 1206601   | 1206740   | 2.04 | SCNN1D  | chr1  | + | -681  | NM_001130413 |
| WT_D3A | 4648 | 145386537 | 145386701 | 2.98 | SCXA    | chr8  | + | -6885 | NM_001008271 |
| WT_D3A | 4648 | 145386537 | 145386701 | 2.98 | SCXB    | chr8  | + | -6885 | NM_001080514 |
| WT_D3A | 3590 | 77890379  | 77890539  | 2.92 | SECTM1  | chr17 | - | -5249 | NM_003004    |
| WT_D3A | 3589 | 77887748  | 77888281  | 2.67 | SECTM1  | chr17 | - | -2804 | NM_003004    |
| WT_D3A | 4203 | 48975258  | 48975622  | 2.02 | SELO    | chr22 | + | -6094 | NM_031454    |

|        |      |           |           |      |          |       |   |       |              |
|--------|------|-----------|-----------|------|----------|-------|---|-------|--------------|
| WT_D3A | 4243 | 52459910  | 52460059  | 2.48 | SEMA3G   | chr3  | - | -5901 | NM_020163    |
| WT_D3A | 3646 | 4508706   | 4508953   | 2.44 | SEMA6B   | chr19 | - | 674   | NM_032108    |
| WT_D3A | 3468 | 7400802   | 7401156   | 2.38 | SENP3    | chr17 | + | -5063 | NM_015670    |
| WT_D3A | 3302 | 1930901   | 1931445   | 2.34 | SEPX1    | chr16 | - | 2122  | NM_016332    |
| WT_D3A | 2708 | 31653369  | 31653933  | 2.44 | SERINC2  | chr1  | + | -4898 | NM_178865    |
| WT_D3A | 3438 | 1595872   | 1596046   | 2.1  | SERPINF2 | chr17 | + | 3080  | NM_001165921 |
| WT_D3A | 3438 | 1595872   | 1596046   | 2.1  | SERPINF2 | chr17 | + | 2890  | NM_001165920 |
| WT_D3A | 2743 | 148172505 | 148173144 | 2.51 | SF3B4    | chr1  | - | -6498 | NM_005850    |
| WT_D3A | 4814 | 1673226   | 1673445   | 2.02 | SFRS17A  | chrX  | + | 2850  | NM_005088    |
| WT_D3A | 3891 | 128173066 | 128173630 | 3.45 | SFT2D3   | chr2  | + | -1718 | NM_032740    |
| WT_D3A | 3522 | 45599782  | 45601224  | 2.59 | SGCA     | chr17 | + | 2139  | NM_001135697 |
| WT_D3A | 3569 | 75805343  | 75806972  | 2.54 | SGSH     | chr17 | - | 2637  | NM_000199    |
| WT_D3A | 3570 | 75810225  | 75810374  | 2.43 | SGSH     | chr17 | - | -1505 | NM_000199    |
| WT_D3A | 3633 | 2729664   | 2731813   | 2.91 | SGTA     | chr19 | - | 3616  | NM_003021    |
| WT_D3A | 4297 | 2759684   | 2763103   | 4.71 | SH3BP2   | chr4  | + | -3154 | NM_001122681 |
| WT_D3A | 4862 | 504525    | 504729    | 2.12 | SHOX     | chrY  | + | -451  | NM_006883    |
| WT_D3A | 3050 | 116557809 | 116557958 | 2.39 | SIDT2    | chr11 | + | 2735  | NM_001040455 |
| WT_D3A | 2877 | 402899    | 403143    | 2.31 | SIGIRR   | chr11 | - | 1978  | NM_001135054 |
| WT_D3A | 3802 | 56653507  | 56654486  | 3.64 | SIGLEC8  | chr19 | - | -476  | NM_014442    |
| WT_D3A | 3013 | 65165976  | 65166435  | 2.95 | SIPA1    | chr11 | + | 2038  | NM_153253    |
| WT_D3A | 3214 | 104283542 | 104283791 | 2.86 | SIVA1    | chr14 | + | -6848 | NM_021709    |
| WT_D3A | 3215 | 104292452 | 104292821 | 2.13 | SIVA1    | chr14 | + | 2122  | NM_021709    |
| WT_D3A | 4341 | 1163142   | 1163591   | 2.98 | SLC12A7  | chr5  | - | 1806  | NM_006598    |
| WT_D3A | 3785 | 54642192  | 54642531  | 2.18 | SLC17A7  | chr19 | - | -5741 | NM_020309    |
| WT_D3A | 4018 | 61047627  | 61047971  | 2.28 | SLC17A9  | chr20 | + | -6644 | NM_022082    |
| WT_D3A | 2997 | 64117306  | 64117845  | 3.63 | SLC22A12 | chr11 | + | 2718  | NM_144585    |
| WT_D3A | 2952 | 2874608   | 2874952   | 2.75 | SLC22A18 | chr11 | + | -2746 | NM_183233    |
| WT_D3A | 2952 | 2874608   | 2874952   | 2.75 | SLC22A18 | chr11 | + | -5307 | NM_002555    |
| WT_D3A | 4357 | 138745812 | 138746356 | 2.4  | SLC23A1  | chr5  | - | 854   | NM_152685    |
| WT_D3A | 3453 | 4786989   | 4787448   | 3.06 | SLC25A11 | chr17 | - | -3011 | NM_001165418 |
| WT_D3A | 3452 | 4781575   | 4781949   | 2.49 | SLC25A11 | chr17 | - | 2445  | NM_001165418 |
| WT_D3A | 2884 | 783444    | 783893    | 3.41 | SLC25A22 | chr11 | - | 2553  | NM_024698    |
| WT_D3A | 3655 | 6417737   | 6418200   | 3.01 | SLC25A23 | chr19 | - | -7187 | NM_024103    |
| WT_D3A | 4709 | 129868646 | 129868995 | 2.74 | SLC25A25 | chr9  | + | -1479 | NM_001006641 |
| WT_D3A | 2686 | 15927101  | 15928625  | 2.73 | SLC25A34 | chr1  | + | -7532 | NM_207348    |
| WT_D3A | 3716 | 19030835  | 19031284  | 2.89 | SLC25A42 | chr19 | + | -4743 | NM_178526    |
| WT_D3A | 3009 | 64903526  | 64903780  | 2.64 | SLC25A45 | chr11 | - | 3065  | NM_182556    |
| WT_D3A | 4812 | 1473000   | 1473424   | 3.62 | SLC25A6  | chrX  | - | -2173 | NM_001636    |
| WT_D3A | 3569 | 75805343  | 75806972  | 2.54 | SLC26A11 | chr17 | + | -2637 | NM_001166349 |
| WT_D3A | 3570 | 75810225  | 75810374  | 2.43 | SLC26A11 | chr17 | + | 1505  | NM_001166349 |
| WT_D3A | 4231 | 48654268  | 48654716  | 2.54 | SLC26A6  | chr3  | - | -6562 | NM_134426    |
| WT_D3A | 2749 | 152016633 | 152016912 | 2.18 | SLC27A3  | chr1  | + | 2381  | NM_024330    |
| WT_D3A | 2820 | 72750250  | 72750664  | 2.33 | SLC29A3  | chr10 | + | 1442  | NM_018344    |
| WT_D3A | 3463 | 7127238   | 7128112   | 3.67 | SLC2A4   | chr17 | + | 1898  | NM_001042    |
| WT_D3A | 4320 | 9630933   | 9632077   | 2.48 | SLC2A9   | chr4  | - | 707   | NM_020041    |
| WT_D3A | 4372 | 176744169 | 176744530 | 2.7  | SLC34A1  | chr5  | + | 312   | NM_003052    |
| WT_D3A | 4794 | 139243386 | 139244110 | 2.87 | SLC34A3  | chr9  | + | -1457 | NM_080877    |

|        |      |           |           |      |           |       |   |       |              |
|--------|------|-----------|-----------|------|-----------|-------|---|-------|--------------|
| WT_D3A | 3695 | 16547706  | 16547945  | 2.19 | SLC35E1   | chr19 | - | -3632 | NM_024881    |
| WT_D3A | 4249 | 127257938 | 127259797 | 2.62 | SLC41A3   | chr3  | - | -559  | NM_001008487 |
| WT_D3A | 4250 | 127262982 | 127263261 | 2.4  | SLC41A3   | chr3  | - | -4813 | NM_001008487 |
| WT_D3A | 4614 | 142311556 | 142311807 | 2.05 | SLC45A4   | chr8  | - | -3826 | NM_001080431 |
| WT_D3A | 4615 | 142312997 | 142314154 | 4.24 | SLC45A4   | chr8  | - | -5720 | NM_001080431 |
| WT_D3A | 3479 | 19560912  | 19561061  | 2.45 | SLC47A2   | chr17 | - | -351  | NM_152908    |
| WT_D3A | 4547 | 150389870 | 150390094 | 2.13 | SLC4A2    | chr7  | + | 2393  | NM_003040    |
| WT_D3A | 4546 | 150388770 | 150388905 | 2.31 | SLC4A2    | chr7  | + | 1248  | NM_003040    |
| WT_D3A | 4358 | 139718392 | 139718951 | 2.24 | SLC4A9    | chr5  | + | -1299 | NM_031467    |
| WT_D3A | 4209 | 10834513  | 10834652  | 2.67 | SLC6A11   | chr3  | + | 1666  | NM_014229    |
| WT_D3A | 4343 | 1276046   | 1276711   | 2.57 | SLC6A18   | chr5  | + | -2091 | NM_182632    |
| WT_D3A | 4842 | 152602888 | 152603162 | 2.66 | SLC6A8    | chrX  | + | -3920 | NM_005629    |
| WT_D3A | 4843 | 152605013 | 152605542 | 2.41 | SLC6A8    | chrX  | + | -1668 | NM_005629    |
| WT_D3A | 4842 | 152602888 | 152603162 | 2.66 | SLC6A8    | chrX  | + | -5134 | NM_001142806 |
| WT_D3A | 4843 | 152605013 | 152605542 | 2.41 | SLC6A8    | chrX  | + | -2882 | NM_001142806 |
| WT_D3A | 2725 | 44254297  | 44254436  | 2.24 | SLC6A9    | chr1  | - | 1218  | NM_006934    |
| WT_D3A | 2726 | 44272443  | 44272771  | 2.57 | SLC6A9    | chr1  | - | -2886 | NM_001024845 |
| WT_D3A | 3371 | 66852553  | 66852885  | 2.87 | SLC7A6    | chr16 | + | -3204 | NM_003983    |
| WT_D3A | 3370 | 66851433  | 66851697  | 2.26 | SLC7A6    | chr16 | + | -4358 | NM_003983    |
| WT_D3A | 3305 | 2015921   | 2016170   | 2.64 | SLC9A3R2  | chr16 | + | -843  | NM_004785    |
| WT_D3A | 3474 | 18160117  | 18160481  | 3.14 | SMCR8     | chr17 | + | 981   | NM_144775    |
| WT_D3A | 2792 | 244739211 | 244739335 | 2.54 | SMYD3     | chr1  | - | -2006 | NM_001167740 |
| WT_D3A | 3659 | 7894030   | 7894494   | 3.09 | SNAPC2    | chr19 | + | 2396  | NR_030717    |
| WT_D3A | 3659 | 7894030   | 7894494   | 3.09 | SNAPC2    | chr19 | + | 3069  | NM_003083    |
| WT_D3A | 2835 | 88709455  | 88710034  | 3.71 | SNCG      | chr10 | + | 1477  | NM_003087    |
| WT_D3A | 3327 | 11671312  | 11671981  | 3.6  | SNN       | chr16 | + | 1845  | NM_003498    |
| WT_D3A | 4825 | 51943341  | 51943985  | 4.56 | SNORA11D  | chrX  | + | -6794 | NR_003711    |
| WT_D3A | 4824 | 51824905  | 51825059  | 2.26 | SNORA11D  | chrX  | - | -1673 | NR_003711    |
| WT_D3A | 4824 | 51824905  | 51825059  | 2.26 | SNORA11E  | chrX  | + | 1800  | NR_003712    |
| WT_D3A | 4859 | 153656517 | 153656876 | 2.72 | SNORA56   | chrX  | + | 230   | NR_002984    |
| WT_D3A | 3974 | 36492961  | 36493408  | 2.76 | SNORA71A  | chr20 | - | -3684 | NR_002911    |
| WT_D3A | 3974 | 36492961  | 36493408  | 2.76 | SNORA71B  | chr20 | - | -5792 | NR_002910    |
| WT_D3A | 3974 | 36492961  | 36493408  | 2.76 | SNORA71C  | chr20 | - | -1323 | NR_003017    |
| WT_D3A | 3974 | 36492961  | 36493408  | 2.76 | SNORA71D  | chr20 | - | 2872  | NR_003018    |
| WT_D3A | 4211 | 12855163  | 12855611  | 2.29 | SNORA7A   | chr3  | - | 1562  | NR_002582    |
| WT_D3A | 3843 | 10510854  | 10511296  | 2.53 | SNORA80B  | chr2  | - | -6649 | NR_028374    |
| WT_D3A | 4662 | 33922208  | 33922447  | 2.56 | SNORD121B | chr9  | + | -1958 | NR_003690    |
| WT_D3A | 4134 | 28060436  | 28060680  | 2.3  | SNORD125  | chr22 | - | -1311 | NR_003686    |
| WT_D3A | 4135 | 28061920  | 28062371  | 2.8  | SNORD125  | chr22 | - | -2898 | NR_003686    |
| WT_D3A | 4136 | 28063686  | 28063949  | 2.5  | SNORD125  | chr22 | - | -4570 | NR_003686    |
| WT_D3A | 4133 | 28057143  | 28057372  | 2.96 | SNORD125  | chr22 | - | 1990  | NR_003686    |
| WT_D3A | 3788 | 54685978  | 54686142  | 2.49 | SNORD32A  | chr19 | + | 1026  | NR_000021    |
| WT_D3A | 3788 | 54685978  | 54686142  | 2.49 | SNORD33   | chr19 | + | 375   | NR_000020    |
| WT_D3A | 3788 | 54685978  | 54686142  | 2.49 | SNORD34   | chr19 | + | 85    | NR_000019    |
| WT_D3A | 3788 | 54685978  | 54686142  | 2.49 | SNORD35A  | chr19 | + | -183  | NR_000018    |
| WT_D3A | 3788 | 54685978  | 54686142  | 2.49 | SNORD35B  | chr19 | + | -6727 | NR_001285    |
| WT_D3A | 4734 | 133343804 | 133344869 | 4.16 | SNORD62A  | chr9  | + | -6536 | NR_002914    |

|        |      |           |           |      |          |       |   |       |              |
|--------|------|-----------|-----------|------|----------|-------|---|-------|--------------|
| WT_D3A | 4734 | 133343804 | 133344869 | 4.16 | SNORD62B | chr9  | + | -6536 | NR_003050    |
| WT_D3A | 4166 | 38039227  | 38040496  | 2.7  | SNORD83A | chr22 | - | 1397  | NR_000027    |
| WT_D3A | 4166 | 38039227  | 38040496  | 2.7  | SNORD83B | chr22 | - | 1     | NR_000028    |
| WT_D3A | 3014 | 65355692  | 65357161  | 2.98 | SNX32    | chr11 | + | -1559 | NM_152760    |
| WT_D3A | 4761 | 137728325 | 137728469 | 2.14 | SOHLH1   | chr9  | - | 2798  | NM_001101677 |
| WT_D3A | 4762 | 137730495 | 137731665 | 2.79 | SOHLH1   | chr9  | - | 115   | NM_001101677 |
| WT_D3A | 3287 | 519855    | 520204    | 2.47 | SOLH     | chr16 | + | 2173  | NM_005632    |
| WT_D3A | 3862 | 39203585  | 39203749  | 2.24 | SOS1     | chr2  | - | -2559 | NM_005633    |
| WT_D3A | 4035 | 62157691  | 62157840  | 2.61 | SOX18    | chr20 | - | -6342 | NM_018419    |
| WT_D3A | 4412 | 34632285  | 34632539  | 2.43 | SPDEF    | chr6  | - | -343  | NM_012391    |
| WT_D3A | 3428 | 88096036  | 88096160  | 2.7  | SPG7     | chr16 | + | -6207 | NM_003119    |
| WT_D3A | 3775 | 53809115  | 53809764  | 2.42 | SPHK2    | chr19 | + | -4920 | NM_020126    |
| WT_D3A | 3796 | 55614028  | 55615478  | 2.89 | SPIB     | chr19 | + | 747   | NM_003121    |
| WT_D3A | 3300 | 1771512   | 1771866   | 3.07 | SPSB3    | chr16 | - | 893   | NM_080861    |
| WT_D3A | 3299 | 1769444   | 1769588   | 2.1  | SPSB3    | chr16 | - | 3066  | NM_080861    |
| WT_D3A | 3022 | 66244878  | 66245712  | 2.83 | SPTBN2   | chr11 | - | 151   | NM_006946    |
| WT_D3A | 3243 | 39972498  | 39973917  | 3.67 | SPTBN5   | chr15 | - | 360   | NM_016642    |
| WT_D3A | 4521 | 100306904 | 100307343 | 3.03 | SRRT     | chr7  | + | -3513 | NM_015908    |
| WT_D3A | 4791 | 139199421 | 139199660 | 2.63 | SSNA1    | chr9  | + | -3334 | NM_003731    |
| WT_D3A | 4790 | 139197516 | 139197985 | 2.29 | SSNA1    | chr9  | + | -5124 | NM_003731    |
| WT_D3A | 4538 | 149106857 | 149107106 | 2.78 | SSPO     | chr7  | + | 2918  | NM_198455    |
| WT_D3A | 4844 | 152708244 | 152708673 | 2.86 | SSR4     | chrX  | + | -4829 | NM_006280    |
| WT_D3A | 4155 | 35934718  | 35936437  | 3.13 | SSTR3    | chr22 | - | 2722  | NM_001051    |
| WT_D3A | 3291 | 1066907   | 1067226   | 2.56 | SSTR5    | chr16 | + | -1715 | NM_001053    |
| WT_D3A | 4244 | 52498726  | 52499690  | 2.27 | STAB1    | chr3  | + | -5187 | NM_015136    |
| WT_D3A | 4592 | 38128368  | 38128942  | 3.14 | STAR     | chr8  | - | -898  | NM_000349    |
| WT_D3A | 3513 | 41430091  | 41430360  | 2.38 | STH      | chr17 | + | -2227 | NM_001007532 |
| WT_D3A | 2964 | 3833439   | 3833583   | 2.09 | STIM1    | chr11 | + | 3     | NM_003156    |
| WT_D3A | 3906 | 219816068 | 219816729 | 3.47 | STK16    | chr2  | + | -2046 | NR_026909    |
| WT_D3A | 3906 | 219816068 | 219816729 | 3.47 | STK16    | chr2  | + | -2037 | NM_001008910 |
| WT_D3A | 4403 | 32045530  | 32045979  | 2.55 | STK19    | chr6  | + | -1870 | NM_032454    |
| WT_D3A | 4403 | 32045530  | 32045979  | 2.55 | STK19    | chr6  | + | -1176 | NR_026717    |
| WT_D3A | 3135 | 97970677  | 97971326  | 2.47 | STK24    | chr13 | - | 1341  | NM_003576    |
| WT_D3A | 3136 | 97978554  | 97979004  | 2.53 | STK24    | chr13 | - | -6437 | NM_003576    |
| WT_D3A | 4664 | 35090951  | 35091305  | 2.1  | STOML2   | chr9  | - | 2026  | NM_013442    |
| WT_D3A | 3584 | 77575827  | 77575961  | 2.68 | STRA13   | chr17 | - | -1832 | NM_144998    |
| WT_D3A | 3656 | 7601442   | 7601701   | 3.19 | STXBP2   | chr19 | + | -6419 | NM_006949    |
| WT_D3A | 3774 | 53748671  | 53749210  | 3.18 | SULT2B1  | chr19 | + | 1700  | NM_177973    |
| WT_D3A | 3525 | 53790618  | 53790787  | 2.38 | SUPT4H1  | chr17 | - | -6140 | NM_003168    |
| WT_D3A | 4745 | 135235305 | 135235539 | 2.31 | SURF4    | chr9  | - | -2631 | NM_033161    |
| WT_D3A | 4408 | 33491004  | 33491524  | 2.58 | SYNGAP1  | chr6  | + | -4560 | NM_006772    |
| WT_D3A | 4167 | 38085837  | 38086801  | 2.62 | SYNGR1   | chr22 | + | -3801 | NM_145738    |
| WT_D3A | 3560 | 73673698  | 73674045  | 2.36 | SYNGR2   | chr17 | + | -2394 | NM_004710    |
| WT_D3A | 2826 | 75088424  | 75088685  | 2.42 | SYNPO2L  | chr10 | - | -2716 | NM_001114133 |
| WT_D3A | 4823 | 48948317  | 48948580  | 2.34 | SYP      | chrX  | - | -4843 | NM_003179    |
| WT_D3A | 2898 | 1803525   | 1805154   | 2.3  | SYT8     | chr11 | + | -7910 | NM_138567    |
| WT_D3A | 2899 | 1811724   | 1811948   | 2.74 | SYT8     | chr11 | + | -413  | NM_138567    |



|        |      |           |           |      |          |       |   |       |              |
|--------|------|-----------|-----------|------|----------|-------|---|-------|--------------|
| WT_D3A | 4435 | 158988520 | 158988769 | 2.68 | SYTL3    | chr6  | + | -2389 | NM_001009991 |
| WT_D3A | 2817 | 70845894  | 70846153  | 2.16 | TACR2    | chr10 | - | 657   | NM_001057    |
| WT_D3A | 2966 | 6587500   | 6587664   | 2.18 | TAF10    | chr11 | - | 2439  | NM_006284    |
| WT_D3A | 3051 | 116577957 | 116578216 | 2.31 | TAGLN    | chr11 | + | 2837  | NM_003186    |
| WT_D3A | 2763 | 158165514 | 158165671 | 2.53 | TAGLN2   | chr1  | - | -3684 | NM_003564    |
| WT_D3A | 4407 | 33395469  | 33397328  | 3.32 | TAPBP    | chr6  | - | -6256 | NM_172209    |
| WT_D3A | 3090 | 52184756  | 52185790  | 2.74 | TARBP2   | chr12 | + | 3630  | NM_134324    |
| WT_D3A | 2674 | 6538355   | 6538504   | 2.68 | TAS1R1   | chr1  | + | 409   | NM_177540    |
| WT_D3A | 3345 | 30290265  | 30292004  | 3.25 | TBC1D10B | chr16 | - | -2111 | NM_015527    |
| WT_D3A | 3025 | 66922729  | 66923348  | 3.34 | TBC1D10C | chr11 | + | -4949 | NM_198517    |
| WT_D3A | 3791 | 55073257  | 55073411  | 2.25 | TBC1D17  | chr19 | + | 841   | NM_001168222 |
| WT_D3A | 4384 | 179264493 | 179265047 | 3.33 | TBC1D9B  | chr5  | - | 2692  | NM_015043    |
| WT_D3A | 2789 | 233592005 | 233592149 | 2.04 | TBCE     | chr1  | + | -5273 | NM_003193    |
| WT_D3A | 4112 | 18126046  | 18126185  | 2.11 | TBX1     | chr22 | + | 1890  | NM_005992    |
| WT_D3A | 3642 | 3554274   | 3555123   | 3.17 | TBXA2R   | chr19 | - | 3133  | NM_201636    |
| WT_D3A | 4035 | 62157691  | 62157840  | 2.61 | TCEA2    | chr20 | + | -6688 | NM_003195    |
| WT_D3A | 4035 | 62157691  | 62157840  | 2.61 | TCEA2    | chr20 | + | -1117 | NM_198723    |
| WT_D3A | 3602 | 42814370  | 42814639  | 3.03 | TCEB3B   | chr18 | - | 1482  | NM_016427    |
| WT_D3A | 3602 | 42814370  | 42814639  | 3.03 | TCEB3C   | chr18 | - | -4057 | NM_145653    |
| WT_D3A | 3602 | 42814370  | 42814639  | 3.03 | TCEB3CL  | chr18 | - | -4293 | NM_001100817 |
| WT_D3A | 3433 | 88464320  | 88464679  | 2.16 | TCF25    | chr16 | + | -2995 | NM_014972    |
| WT_D3A | 3629 | 1609448   | 1610195   | 2.53 | TCF3     | chr19 | - | -6495 | NM_003200    |
| WT_D3A | 3033 | 67560218  | 67561942  | 4.83 | TCIRG1   | chr11 | + | -1978 | NM_006019    |
| WT_D3A | 3033 | 67560218  | 67561942  | 4.83 | TCIRG1   | chr11 | + | -5942 | NM_006053    |
| WT_D3A | 4039 | 32881645  | 32881808  | 2.2  | TCP10L   | chr21 | - | -2010 | NM_144659    |
| WT_D3A | 4038 | 32876268  | 32876700  | 2.41 | TCP10L   | chr21 | - | 3232  | NM_144659    |
| WT_D3A | 4426 | 44379678  | 44380213  | 2.93 | TCTE1    | chr6  | - | -6509 | NM_182539    |
| WT_D3A | 4274 | 197535025 | 197536381 | 4.01 | TCTEX1D2 | chr3  | - | -6147 | NM_152773    |
| WT_D3A | 4414 | 35569834  | 35569988  | 2.38 | TEAD3    | chr6  | - | 2928  | NM_003214    |
| WT_D3A | 2714 | 36325463  | 36326422  | 2.94 | TEKT2    | chr1  | + | 3680  | NM_014466    |
| WT_D3A | 4665 | 35597681  | 35598150  | 2.32 | TESK1    | chr9  | + | 2635  | NM_006285    |
| WT_D3A | 4058 | 42658727  | 42659146  | 3.44 | TFF1     | chr21 | - | 777   | NM_003225    |
| WT_D3A | 4059 | 42661123  | 42661347  | 2.68 | TFF1     | chr21 | - | -1522 | NM_003225    |
| WT_D3A | 4518 | 100077506 | 100077955 | 2.3  | TFR2     | chr7  | - | -621  | NM_003227    |
| WT_D3A | 3185 | 75515821  | 75516344  | 2.67 | TGFB3    | chr14 | - | 1763  | NM_003239    |
| WT_D3A | 3186 | 75517016  | 75517843  | 3.07 | TGFB3    | chr14 | - | 416   | NM_003239    |
| WT_D3A | 3174 | 23806725  | 23806959  | 2.61 | TGM1     | chr14 | - | -4586 | NM_000359    |
| WT_D3A | 2917 | 2150923   | 2151247   | 3.45 | TH       | chr11 | - | -1474 | NM_000360    |
| WT_D3A | 3317 | 3015407   | 3015861   | 2.34 | THOC6    | chr16 | + | 1602  | NM_001142350 |
| WT_D3A | 3633 | 2729664   | 2731813   | 2.91 | THOP1    | chr19 | + | -5767 | NM_003249    |
| WT_D3A | 4639 | 144746556 | 144746710 | 2.19 | TIGD5    | chr8  | + | -4583 | NM_032862    |
| WT_D3A | 4242 | 52238054  | 52238580  | 2.23 | TLR9     | chr3  | - | -3098 | NM_017442    |
| WT_D3A | 3557 | 73642588  | 73643342  | 2.9  | TMC6     | chr17 | - | -2882 | NM_007267    |
| WT_D3A | 3558 | 73644693  | 73646544  | 3.18 | TMC6     | chr17 | - | -5535 | NM_007267    |
| WT_D3A | 3557 | 73642588  | 73643342  | 2.9  | TMC6     | chr17 | - | -6509 | NM_001127198 |
| WT_D3A | 3556 | 73631863  | 73632042  | 2.39 | TMC8     | chr17 | + | -6501 | NM_152468    |
| WT_D3A | 3672 | 10806710  | 10806974  | 2.47 | TMED1    | chr19 | - | 1141  | NM_006858    |

|        |      |           |           |      |                 |       |   |       |              |
|--------|------|-----------|-----------|------|-----------------|-------|---|-------|--------------|
| WT_D3A | 4782 | 138808031 | 138808210 | 2.47 | TMEM141         | chr9  | + | 2523  | NM_032928    |
| WT_D3A | 4459 | 1564493   | 1565057   | 3.36 | TMEM184A        | chr7  | - | -2183 | NM_001097620 |
| WT_D3A | 3828 | 60582136  | 60582295  | 2.37 | TMEM190         | chr19 | + | 2200  | NM_139172    |
| WT_D3A | 3294 | 1525275   | 1528112   | 2.75 | TMEM204         | chr16 | + | 2462  | NM_024600    |
| WT_D3A | 3854 | 27102350  | 27103174  | 2.48 | TMEM214         | chr2  | + | -6515 | NM_001083590 |
| WT_D3A | 2652 | 1843540   | 1843789   | 2.62 | TMEM52          | chr1  | - | -3064 | NM_178545    |
| WT_D3A | 3824 | 60429318  | 60429652  | 2.44 | TMEM86B         | chr19 | - | 2959  | NM_173804    |
| WT_D3A | 3469 | 7694925   | 7695159   | 3.22 | TMEM88          | chr17 | + | -4066 | NM_203411    |
| WT_D3A | 4749 | 135385527 | 135386046 | 2.72 | TMEM8C          | chr9  | - | -5897 | NM_001080483 |
| WT_D3A | 4748 | 135383302 | 135384346 | 3.15 | TMEM8C          | chr9  | - | -3935 | NM_001080483 |
| WT_D3A | 3445 | 3512851   | 3513306   | 2.64 | TMEM93          | chr17 | + | -5760 | NM_031298    |
| WT_D3A | 3312 | 2829485   | 2830299   | 2.96 | TMPRSS8         | chr16 | - | 2861  | NR_026864    |
| WT_D3A | 3868 | 84982179  | 84982348  | 2.03 | TMSB10          | chr2  | + | -4010 | NM_021103    |
| WT_D3A | 3207 | 102664449 | 102664768 | 2.75 | TNFAIP2         | chr14 | + | 2192  | NM_006291    |
| WT_D3A | 3648 | 4592352   | 4592993   | 3.49 | TNFAIP8L1       | chr19 | + | 1644  | NM_001167942 |
| WT_D3A | 3647 | 4591062   | 4591386   | 3.2  | TNFAIP8L1       | chr19 | + | 196   | NM_001167942 |
| WT_D3A | 3648 | 4592352   | 4592993   | 3.49 | TNFAIP8L1       | chr19 | + | 2146  | NM_152362    |
| WT_D3A | 3647 | 4591062   | 4591386   | 3.2  | TNFAIP8L1       | chr19 | + | 698   | NM_152362    |
| WT_D3A | 3316 | 3003840   | 3004169   | 2.48 | TNFRSF12A       | chr16 | + | -6309 | NM_016639    |
| WT_D3A | 4171 | 40659166  | 40659795  | 2.9  | TNFRSF13C       | chr22 | - | -6713 | NM_052945    |
| WT_D3A | 2664 | 2483371   | 2483830   | 2.6  | TNFRSF14        | chr1  | - | 3013  | NM_003820    |
| WT_D3A | 2682 | 12146454  | 12146828  | 2.4  | TNFRSF1B        | chr1  | + | -3005 | NM_001066    |
| WT_D3A | 2680 | 12039132  | 12039376  | 2.45 | TNFRSF8         | chr1  | + | -6766 | NM_001243    |
| WT_D3A | 2681 | 12110177  | 12110401  | 3.04 | TNFRSF8         | chr1  | + | 1745  | NM_152942    |
| WT_D3A | 3467 | 7394430   | 7395654   | 3.7  | TNFSF12         | chr17 | + | 1944  | NM_003809    |
| WT_D3A | 3467 | 7394430   | 7395654   | 3.7  | TNFSF12-TNFSF13 | chr17 | + | 1903  | NM_172089    |
| WT_D3A | 3467 | 7394430   | 7395654   | 3.7  | TNFSF13         | chr17 | + | -7290 | NM_172088    |
| WT_D3A | 3468 | 7400802   | 7401156   | 2.38 | TNFSF13         | chr17 | + | -1353 | NM_172088    |
| WT_D3A | 4273 | 197103863 | 197104582 | 3.77 | TNK2            | chr3  | - | 2607  | NM_001010938 |
| WT_D3A | 4243 | 52459910  | 52460059  | 2.48 | TNNC1           | chr3  | - | 3113  | NM_003280    |
| WT_D3A | 2899 | 1811724   | 1811948   | 2.74 | TNNI2           | chr11 | + | -6171 | NM_001145841 |
| WT_D3A | 2899 | 1811724   | 1811948   | 2.74 | TNNI2           | chr11 | + | -4972 | NM_003282    |
| WT_D3A | 2899 | 1811724   | 1811948   | 2.74 | TNNI2           | chr11 | + | -5458 | NM_001145829 |
| WT_D3A | 3822 | 60362207  | 60362936  | 2.57 | TNNI3           | chr19 | - | -1659 | NM_000363    |
| WT_D3A | 2903 | 1894822   | 1895776   | 3.6  | TNNT3           | chr11 | + | -2075 | NM_001042782 |
| WT_D3A | 3899 | 217432462 | 217432586 | 2.66 | TNP1            | chr2  | - | 503   | NM_003284    |
| WT_D3A | 3326 | 11274458  | 11275102  | 3    | TNP2            | chr16 | - | -4119 | NM_005425    |
| WT_D3A | 4489 | 47546657  | 47547489  | 3.59 | TNS3            | chr7  | - | -1349 | NM_022748    |
| WT_D3A | 4404 | 32123595  | 32124129  | 2.67 | TNXB            | chr6  | - | -1979 | NM_032470    |
| WT_D3A | 3474 | 18160117  | 18160481  | 3.14 | TOP3A           | chr17 | - | -1253 | NM_004618    |
| WT_D3A | 3475 | 18162822  | 18162973  | 2.47 | TOP3A           | chr17 | - | -3851 | NM_004618    |
| WT_D3A | 4706 | 129540108 | 129540242 | 2.43 | TOR2A           | chr9  | - | -2750 | NM_001085347 |
| WT_D3A | 3058 | 128317011 | 128317560 | 2.64 | TP53AIP1        | chr11 | - | 747   | NM_022112    |
| WT_D3A | 3072 | 6842780   | 6843734   | 2.62 | TPI1            | chr12 | + | -3587 | NM_001159287 |
| WT_D3A | 3073 | 6848488   | 6848717   | 2.56 | TPI1            | chr12 | + | 1758  | NM_001159287 |
| WT_D3A | 3072 | 6842780   | 6843734   | 2.62 | TPI1            | chr12 | + | -3696 | NM_000365    |
| WT_D3A | 3073 | 6848488   | 6848717   | 2.56 | TPI1            | chr12 | + | 1649  | NM_000365    |

|        |      |           |           |      |          |       |   |       |              |
|--------|------|-----------|-----------|------|----------|-------|---|-------|--------------|
| WT_D3A | 3072 | 6842780   | 6843734   | 2.62 | TPI1     | chr12 | + | -4281 | NR_027483    |
| WT_D3A | 3073 | 6848488   | 6848717   | 2.56 | TPI1     | chr12 | + | 1064  | NR_027483    |
| WT_D3A | 3362 | 65990238  | 65990569  | 3.51 | TPPP3    | chr16 | - | -5481 | NM_015964    |
| WT_D3A | 3416 | 87444290  | 87444719  | 2.53 | TRAPPC2L | chr16 | + | -6502 | NM_016209    |
| WT_D3A | 4265 | 161653396 | 161653523 | 2.72 | TRIM59   | chr3  | - | -3139 | NM_173084    |
| WT_D3A | 2994 | 63838586  | 63839335  | 2.66 | TRMT112  | chr11 | - | 2649  | NM_016404    |
| WT_D3A | 2933 | 2401817   | 2402141   | 2.61 | TRPM5    | chr11 | - | -1128 | NM_014555    |
| WT_D3A | 2934 | 2404512   | 2404841   | 2.36 | TRPM5    | chr11 | - | -3825 | NM_014555    |
| WT_D3A | 4603 | 116748861 | 116749285 | 2.74 | TRPS1    | chr8  | - | 1329  | NM_014112    |
| WT_D3A | 2991 | 63747212  | 63748069  | 2.43 | TRPT1    | chr11 | - | 2662  | NM_001160392 |
| WT_D3A | 2991 | 63747212  | 63748069  | 2.43 | TRPT1    | chr11 | - | 2277  | NM_001160393 |
| WT_D3A | 4535 | 142343376 | 142343625 | 2.56 | TRPV5    | chr7  | - | -2558 | NM_019841    |
| WT_D3A | 4534 | 142291635 | 142292064 | 2.5  | TRPV6    | chr7  | - | 1750  | NM_018646    |
| WT_D3A | 4735 | 134813754 | 134814404 | 2.65 | TSC1     | chr9  | - | -4238 | NM_001162427 |
| WT_D3A | 3306 | 2032041   | 2032210   | 2.42 | TSC2     | chr16 | + | -5865 | NM_001077183 |
| WT_D3A | 3307 | 2033152   | 2034181   | 2.6  | TSC2     | chr16 | + | -4324 | NM_001077183 |
| WT_D3A | 4620 | 143487146 | 143487619 | 2.44 | TSNARE1  | chr8  | - | -4934 | NM_145003    |
| WT_D3A | 4621 | 143488828 | 143489293 | 2.4  | TSNARE1  | chr8  | - | -6612 | NM_145003    |
| WT_D3A | 4619 | 143479967 | 143481526 | 3.76 | TSNARE1  | chr8  | - | 1702  | NM_145003    |
| WT_D3A | 3579 | 77222115  | 77222649  | 3.5  | TSPAN10  | chr17 | + | 2629  | NM_031945    |
| WT_D3A | 2832 | 82198050  | 82198381  | 2.04 | TSPAN14  | chr10 | + | -5802 | NM_001128309 |
| WT_D3A | 3865 | 54336155  | 54336504  | 2.79 | TSPYL6   | chr2  | - | 584   | NM_001003937 |
| WT_D3A | 2711 | 32602207  | 32602535  | 2.46 | TSSK3    | chr1  | + | 1923  | NM_052841    |
| WT_D3A | 3245 | 41005442  | 41005787  | 2.91 | TTBK2    | chr15 | - | -5315 | NM_173500    |
| WT_D3A | 2732 | 51580917  | 51581046  | 2.01 | TTC39A   | chr1  | - | 2392  | NM_001144832 |
| WT_D3A | 4392 | 24776908  | 24777048  | 2.06 | TTRAP    | chr6  | - | -1884 | NM_016614    |
| WT_D3A | 3907 | 219824755 | 219825314 | 2.62 | TUBA4A   | chr2  | - | 1848  | NM_006000    |
| WT_D3A | 3907 | 219824755 | 219825314 | 2.62 | TUBA4B   | chr2  | + | -1174 | NR_003063    |
| WT_D3A | 4795 | 139256699 | 139256848 | 3.11 | TUBB2C   | chr9  | + | 1242  | NM_006088    |
| WT_D3A | 4796 | 139258179 | 139259513 | 3.02 | TUBB2C   | chr9  | + | 3315  | NM_006088    |
| WT_D3A | 3599 | 12294359  | 12295608  | 3.1  | TUBB6    | chr18 | + | -3273 | NM_032525    |
| WT_D3A | 2875 | 134978429 | 134978683 | 2.27 | TUBGCP2  | chr10 | - | -5922 | NM_006659    |
| WT_D3A | 2874 | 134969361 | 134969695 | 2.31 | TUBGCP2  | chr10 | - | 3106  | NM_006659    |
| WT_D3A | 3339 | 28763567  | 28763791  | 2.58 | TUFM     | chr16 | - | 1551  | NM_003321    |
| WT_D3A | 3777 | 54090250  | 54090619  | 3.71 | TULP2    | chr19 | - | 3374  | NM_003323    |
| WT_D3A | 3778 | 54100689  | 54100850  | 2.08 | TULP2    | chr19 | - | -6961 | NM_003323    |
| WT_D3A | 4236 | 50343474  | 50343693  | 2.85 | TUSC2    | chr3  | - | -2911 | NM_007275    |
| WT_D3A | 3436 | 1129840   | 1130574   | 2.68 | TUSC5    | chr17 | + | 501   | NM_172367    |
| WT_D3A | 3382 | 70687882  | 70688409  | 2.5  | TXNL4B   | chr16 | - | -3105 | NM_017853    |
| WT_D3A | 3383 | 70690058  | 70690199  | 2.28 | TXNL4B   | chr16 | - | -5088 | NM_017853    |
| WT_D3A | 3382 | 70687882  | 70688409  | 2.5  | TXNL4B   | chr16 | - | -2876 | NM_001142317 |
| WT_D3A | 3383 | 70690058  | 70690199  | 2.28 | TXNL4B   | chr16 | - | -4859 | NM_001142317 |
| WT_D3A | 3382 | 70687882  | 70688409  | 2.5  | TXNL4B   | chr16 | - | -2429 | NM_001142318 |
| WT_D3A | 3383 | 70690058  | 70690199  | 2.28 | TXNL4B   | chr16 | - | -4412 | NM_001142318 |
| WT_D3A | 3239 | 39640158  | 39641402  | 2.9  | TYRO3    | chr15 | + | 2257  | NM_006293    |
| WT_D3A | 4786 | 139094774 | 139095233 | 2.54 | UAP1L1   | chr9  | + | 3230  | NM_207309    |
| WT_D3A | 2648 | 1195480   | 1196829   | 2.81 | UBE2J2   | chr1  | - | 2943  | NM_058167    |

|        |      |           |           |      |         |       |   |       |              |
|--------|------|-----------|-----------|------|---------|-------|---|-------|--------------|
| WT_D3A | 4031 | 62049017  | 62049366  | 2.69 | UCKL1A5 | chr20 | + | -5989 | NR_027287    |
| WT_D3A | 4229 | 48578244  | 48578403  | 2.58 | UCN2    | chr3  | - | -2118 | NM_033199    |
| WT_D3A | 4230 | 48579315  | 48580977  | 2.64 | UCN2    | chr3  | - | -3941 | NM_033199    |
| WT_D3A | 4326 | 69577000  | 69577245  | 2.6  | UGT2B15 | chr4  | - | -6143 | NM_001076    |
| WT_D3A | 3254 | 72921950  | 72922274  | 2.86 | ULK3    | chr15 | - | 493   | NM_001099436 |
| WT_D3A | 3545 | 71354017  | 71354166  | 2.33 | UNC13D  | chr17 | - | -1698 | NM_199242    |
| WT_D3A | 3546 | 71356002  | 71356656  | 3.42 | UNC13D  | chr17 | - | -3936 | NM_199242    |
| WT_D3A | 3879 | 98589002  | 98589136  | 2.53 | UNC50   | chr2  | + | -2404 | NM_014044    |
| WT_D3A | 4164 | 37486582  | 37487032  | 3    | UNC84B  | chr22 | - | -4914 | NM_015374    |
| WT_D3A | 4442 | 167627524 | 167627743 | 2.61 | UNC93A  | chr6  | + | 2841  | NM_001143947 |
| WT_D3A | 2728 | 45245489  | 45245808  | 3    | UROD    | chr1  | + | -4768 | NM_000374    |
| WT_D3A | 3699 | 17184879  | 17185348  | 2.76 | USE1    | chr19 | + | -2041 | NM_018467    |
| WT_D3A | 3732 | 40453852  | 40454181  | 2.65 | USF2    | chr19 | + | 2281  | NM_207291    |
| WT_D3A | 4819 | 46970264  | 46971708  | 3.23 | USP11   | chrX  | + | -6271 | NM_004651    |
| WT_D3A | 3047 | 77579624  | 77580063  | 2.01 | USP35   | chr11 | + | 2238  | NM_020798    |
| WT_D3A | 3564 | 74351733  | 74352856  | 4.07 | USP36   | chr17 | - | -3730 | NM_025090    |
| WT_D3A | 4753 | 135845636 | 135845775 | 3.03 | VAV2    | chr9  | - | 1562  | NM_003371    |
| WT_D3A | 4214 | 38010136  | 38010295  | 2.22 | VILL    | chr3  | + | 134   | NM_015873    |
| WT_D3A | 4432 | 153116031 | 153116200 | 2.11 | VIP     | chr6  | + | 2490  | NM_194435    |
| WT_D3A | 4565 | 158636953 | 158637087 | 2.18 | VIPR2   | chr7  | - | -6610 | NM_003382    |
| WT_D3A | 4564 | 158631502 | 158631712 | 2.13 | VIPR2   | chr7  | - | -1197 | NM_003382    |
| WT_D3A | 3350 | 31014262  | 31014891  | 2.97 | VKORC1  | chr16 | - | -799  | NM_024006    |
| WT_D3A | 4655 | 145628310 | 145628935 | 2.9  | VPS28   | chr8  | - | -3887 | NM_016208    |
| WT_D3A | 4498 | 72789487  | 72789721  | 3    | WBSCR26 | chr7  | + | 2270  | NR_026690    |
| WT_D3A | 4754 | 135997157 | 135997615 | 2.55 | WDR5    | chr9  | + | 2652  | NM_052821    |
| WT_D3A | 3259 | 76383515  | 76383646  | 2.13 | WDR61   | chr15 | - | -4585 | NM_025234    |
| WT_D3A | 3978 | 43858863  | 43859212  | 2.47 | WFDC3   | chr20 | - | -5083 | NM_080614    |
| WT_D3A | 3656 | 7601442   | 7601701   | 3.19 | XAB2    | chr19 | - | -1132 | NM_020196    |
| WT_D3A | 2706 | 28157721  | 28157860  | 2.17 | XKR8    | chr1  | + | -1300 | NM_018053    |
| WT_D3A | 3760 | 48774388  | 48774705  | 2.88 | XRCC1   | chr19 | - | -2976 | NM_006297    |
| WT_D3A | 4120 | 20316930  | 20317254  | 3.18 | YDJC    | chr22 | - | -2752 | NM_001017964 |
| WT_D3A | 3674 | 10895716  | 10897465  | 3.14 | YIPF2   | chr19 | - | 3767  | NM_024029    |
| WT_D3A | 4121 | 20423379  | 20423632  | 2.4  | YPEL1   | chr22 | - | -3434 | NM_013313    |
| WT_D3A | 4407 | 33395469  | 33397328  | 3.32 | ZBTB22  | chr6  | - | -2701 | NM_001145338 |
| WT_D3A | 4407 | 33395469  | 33397328  | 3.32 | ZBTB22  | chr6  | - | -2908 | NM_005453    |
| WT_D3A | 3466 | 7321445   | 7322819   | 3.18 | ZBTB4   | chr17 | - | 1536  | NM_001128833 |
| WT_D3A | 4409 | 33523956  | 33524300  | 2.71 | ZBTB9   | chr6  | + | -6205 | NM_152735    |
| WT_D3A | 2718 | 37713539  | 37715513  | 3.8  | ZC3H12A | chr1  | + | 1821  | NM_025079    |
| WT_D3A | 4714 | 130524038 | 130524377 | 3.2  | ZDHHC12 | chr9  | - | 2022  | NM_032799    |
| WT_D3A | 3020 | 66065699  | 66067153  | 3.15 | ZDHHC24 | chr11 | - | 3821  | NM_207340    |
| WT_D3A | 4115 | 18493476  | 18494445  | 5.26 | ZDHHC8  | chr22 | + | -5404 | NM_013373    |
| WT_D3A | 4607 | 135777290 | 135777859 | 2.87 | ZFAT    | chr8  | - | 407   | NM_001167583 |
| WT_D3A | 3412 | 87040342  | 87041261  | 3.79 | ZFPM1   | chr16 | + | -6713 | NM_153813    |
| WT_D3A | 3311 | 2819363   | 2819587   | 2.53 | ZG16B   | chr16 | + | -698  | NM_145252    |
| WT_D3A | 4396 | 28335215  | 28335434  | 2.37 | ZKSCAN4 | chr6  | - | -7343 | NM_019110    |
| WT_D3A | 4487 | 44760377  | 44760631  | 2.69 | ZMIZ2   | chr7  | + | -1807 | NM_174929    |
| WT_D3A | 4488 | 44762787  | 44763231  | 2.93 | ZMIZ2   | chr7  | + | 698   | NM_174929    |

|        |      |           |           |      |         |       |   |       |              |
|--------|------|-----------|-----------|------|---------|-------|---|-------|--------------|
| WT_D3A | 3984 | 45423625  | 45423852  | 2.39 | ZMYND8  | chr20 | - | -4857 | NM_183048    |
| WT_D3A | 3762 | 49694502  | 49695976  | 2.84 | ZNF180  | chr19 | - | 1175  | NM_013256    |
| WT_D3A | 3991 | 51631673  | 51633222  | 2.71 | ZNF217  | chr20 | - | 596   | NM_006526    |
| WT_D3A | 3432 | 88311333  | 88312587  | 4    | ZNF276  | chr16 | + | -2933 | NM_152287    |
| WT_D3A | 3432 | 88311333  | 88312587  | 4    | ZNF276  | chr16 | + | -3492 | NM_001113525 |
| WT_D3A | 4660 | 145986688 | 145986847 | 2.34 | ZNF34   | chr8  | - | -3238 | NM_030580    |
| WT_D3A | 3835 | 63116791  | 63117253  | 2.24 | ZNF417  | chr19 | - | 2768  | NM_152475    |
| WT_D3A | 3761 | 48819880  | 48820425  | 3.33 | ZNF428  | chr19 | - | -4298 | NM_182498    |
| WT_D3A | 4538 | 149106857 | 149107106 | 2.78 | ZNF467  | chr7  | - | -5753 | NM_207336    |
| WT_D3A | 2795 | 245558680 | 245559219 | 2.53 | ZNF496  | chr1  | - | 2719  | NM_032752    |
| WT_D3A | 2796 | 245564402 | 245565435 | 2.85 | ZNF496  | chr1  | - | -3250 | NM_032752    |
| WT_D3A | 2828 | 76836430  | 76836583  | 2.34 | ZNF503  | chr10 | - | -4987 | NM_032772    |
| WT_D3A | 2873 | 134966536 | 134967510 | 3.06 | ZNF511  | chr10 | + | -5389 | NM_145806    |
| WT_D3A | 2874 | 134969361 | 134969695 | 2.31 | ZNF511  | chr10 | + | -2884 | NM_145806    |
| WT_D3A | 3635 | 2766624   | 2767761   | 3.35 | ZNF554  | chr19 | + | -3679 | NM_001102651 |
| WT_D3A | 3661 | 8795035   | 8795269   | 2.61 | ZNF558  | chr19 | - | -587  | NM_144693    |
| WT_D3A | 3738 | 42396048  | 42396361  | 2.94 | ZNF585B | chr19 | - | -2913 | NM_152279    |
| WT_D3A | 4566 | 169534    | 169881    | 2.27 | ZNF596  | chr8  | + | -2676 | NM_001042416 |
| WT_D3A | 4566 | 169534    | 169881    | 2.27 | ZNF596  | chr8  | + | -2492 | NM_173539    |
| WT_D3A | 3304 | 1997726   | 1998365   | 3.6  | ZNF598  | chr16 | - | 1719  | NM_178167    |
| WT_D3A | 2784 | 225815897 | 225816236 | 2.8  | ZNF678  | chr1  | + | -1800 | NM_178549    |
| WT_D3A | 4633 | 144438499 | 144438633 | 2.11 | ZNF696  | chr8  | + | -6367 | NM_030895    |
| WT_D3A | 4661 | 146016475 | 146017209 | 2.35 | ZNF7    | chr8  | + | -6864 | NM_003416    |
| WT_D3A | 4276 | 487172    | 487423    | 2.74 | ZNF721  | chr4  | - | -3855 | NM_133474    |
| WT_D3A | 4275 | 480007    | 481253    | 2.58 | ZNF721  | chr4  | - | 2812  | NM_133474    |
| WT_D3A | 3595 | 78389990  | 78390157  | 2.37 | ZNF750  | chr17 | - | 1147  | NM_024702    |
| WT_D3A | 3123 | 132119469 | 132119723 | 2.19 | ZNF84   | chr12 | + | -4456 | NM_001127372 |
| WT_D3A | 3123 | 132119469 | 132119723 | 2.19 | ZNF84   | chr12 | + | -4354 | NM_003428    |

**D3A\_WT: DNA hypermethylation in samples with DNMT3A mutations (D3A) compared to those without DNMT3A mutations (WT). WT\_D3A: DNA hypermethylation in samples without DNMT3A mutations (WT) compared to those with DNMT3A mutations (D3A). Peak: DNA methylation enrichment region. PeakID: A serial number given by SQL software for each peak. PeakScore: The average  $-\log_{10}$  (P-value) from probes within the peak. The scores reflect the probability of positive enrichment. (Cut off=2). GeneName: The gene which the peak overlaps its promoter region. PeakToTSS: The distance from the centre of the peak to the translation start site (TSS).**

**Supplementary Table 10. Multivariate analysis of clinical and molecular variables**

| Variables                 | CR    |                        | OS    |                        | TTF   |                        |
|---------------------------|-------|------------------------|-------|------------------------|-------|------------------------|
|                           | P     | OR (95% CI)            | P     | OR (95% CI)            | P     | OR (95% CI)            |
| Age                       | NS    | -                      | NS    | -                      | NS    | -                      |
| Gender                    | NS    | -                      | NS    | -                      | NS    | -                      |
| WBC count                 | 0.046 | 0.994<br>(0.988-1.000) | 0.002 | 1.005<br>(1.002-1.007) | 0.009 | 1.004<br>(1.001-1.007) |
| Monoblasts in BM          | NS    | -                      | NS    | -                      | NS    | -                      |
| <i>DNMT3A</i> mutations   | 0.047 | 0.349<br>(0.122-1.002) | 0.009 | 2.169<br>(1.217-3.867) | 0.019 | 2.018<br>(1.123-3.626) |
| <i>MLL</i> abnormalities  | NS    | -                      | NS    | -                      | 0.072 | 1.817<br>(0.948-3.480) |
| <i>NPM1</i> mutations     | NS    | -                      | NS    | -                      | NS    | -                      |
| <i>NRAS</i> mutations     | NS    | -                      | NS    | -                      | NS    | -                      |
| <i>FLT3</i> abnormalities | NS    | -                      | NS    | -                      | NS    | -                      |

NS: no significance.

Binary logistic regression was used for the multivariate analysis of CR rate. A Cox model was used to identify prognostic variables for OS and TTF. A limited backward selection procedure was used to exclude redundant or unnecessary variables. To provide quantitative information on the relevance of results, 95% confidence intervals (CI) of odds ratios (OR) was calculated.

**Supplementary Table 11. Sequenom BS-MS analysis primers.**

|                 |                                |
|-----------------|--------------------------------|
| HOXB2_BS-MS_F   | ATTTGGAAAAGAGGAAGGTTTTTTT      |
| HOXB2_BS-MS_R   | AAAACCTCTCTATTAACCCAAAACCTC    |
| HOXB4_BS-MS_F   | GGGTTTTTGGAAAGGTATAGAATGTT     |
| HOXB4_BS-MS_R   | CCCTCCTACTTACTATCAAATAAAACAAAA |
| HOXB5_BS-MS_F   | TGATTTTAAGAGGTAATTTATGTTTTATGG |
| HOXB5_BS-MS_R   | TAAATAAAAAACCCAACCCCTACTC      |
| HOXB7_BS-MS_F   | TGGTTTGGTTTAATAAAGAATAGATTTG   |
| HOXB7_BS-MS_R   | AAAATCCAAATTTACACCAAAAAAAA     |
| IDH1_BS-MS_F    | GATGGAGAATTTATGGTGTTATTTTT     |
| IDH1_BS-MS_R    | TTTTCCATCCTTTACATTAACAAC       |
| T7-promoter tag | CAGTAATACGACTCACTATAGGGAGA     |
| Decamer linker  | AGGAAGAGAG                     |
